# Supplementary material for: A novel application of hectorite nanoclay for preparation of colorectal cancer spheroids with malignant potential
Source: Royal Society of Chemistry journal article supplement (doi:10.1039/d2lc00750a), 2023-01-01
Supplement: d2lc00750a1.xlsx [file d2lc00750a1.xlsx]

## Sheet: Dataset_S1
Gene Symbol	Entrez ID	Description	F-hectorite Avg (log2)	Ctrl Avg (log2)	Fold Change	P-val	FDR P-val
FGF19	9965	fibroblast growth factor 19	9.57841	6.03106	11.6912	6.39e-08	5.02e-05
TGM2	7052	transglutaminase 2	12.4477	9.32267	8.72451	2.63e-06	0.000538131
XKRX	402415	X-linked Kx blood group related, X-linked	9.5101	6.51518	7.9719	1.82e-07	0.000100225
SEMA3A	10371	sema domain, immunoglobulin domain (Ig), short basic domain, secreted, (semaphorin) 3A	12.4968	9.99052	5.68151	4.51e-08	3.87e-05
SERPINA3	12	serpin peptidase inhibitor, clade A (alpha-1 antiproteinase, antitrypsin), member 3	8.18895	5.69128	5.64774	6.14e-06	0.000978554
ASIC1	41	acid sensing ion channel 1	6.72627	4.281	5.44629	0.000865877	0.0246631
ENG	2022	endoglin	11.8973	9.57727	4.99332	5.53e-07	0.000178642
MGAM2	93432	maltase-glucoamylase 2 (putative)	11.2181	8.92947	4.88602	6.79e-07	0.000199581
ERMP1	79956	endoplasmic reticulum metallopeptidase 1	13.3425	11.0817	4.79265	3.47e-07	0.000140045
ATP13A2	23400	ATPase type 13A2	9.74449	7.49196	4.76519	4.73e-06	0.00080647
ALDH2	217	aldehyde dehydrogenase 2 family (mitochondrial)	11.4262	9.18926	4.71406	7.12e-06	0.00107521
TEAD2	8463	TEA domain family member 2	11.4262	9.2428	4.54223	5.56e-06	0.00091198
LRIG1	26018	leucine-rich repeats and immunoglobulin-like domains 1	10.3713	8.18945	4.53723	8.21e-07	0.000222808
AQP5	362	aquaporin 5	12.9372	10.7687	4.4955	1.68e-05	0.00179391
HOXB8	3218	homeobox B8	6.11208	3.97774	4.39034	0.000157848	0.00825736
TESC	54997	tescalcin	12.0769	9.95754	4.34492	2.6e-07	0.000118736
TGFBI	7045	transforming growth factor, beta-induced, 68kDa	10.7658	8.72474	4.11533	3.19e-06	0.00060599
ROR1	4919	receptor tyrosine kinase-like orphan receptor 1	13.1123	11.0928	4.05446	2.99e-07	0.000125572
COL9A3	1299	collagen, type IX, alpha 3	9.27779	7.28438	3.98178	2.52e-06	0.000523889
LMO4	8543	LIM domain only 4	12.6255	10.6863	3.83494	1.07e-06	0.000268038
CREB3L1	90993	cAMP responsive element binding protein 3-like 1	7.9006	5.96684	3.8205	3.68e-06	0.000663958
TGFB2	7042	transforming growth factor beta 2	9.17933	7.30731	3.66045	6.05e-05	0.00441995
DOCK9	23348	dedicator of cytokinesis 9	9.37019	7.49879	3.65888	2.52e-05	0.00240537
MMP7	4316	matrix metallopeptidase 7	11.9132	10.0741	3.57789	3.64e-05	0.00309969
FAM131B	9715	family with sequence similarity 131, member B	5.73094	3.9205	3.50748	1.23e-05	0.00151151
ZYX	7791	zyxin	9.8827	8.07289	3.50595	1.47e-06	0.00033918
PPM1L	151742	protein phosphatase, Mg2+/Mn2+ dependent, 1L	7.32168	5.53157	3.45842	1.03e-05	0.00131646
SEMA3A		Transcript Identified by AceView, Entrez Gene ID(s) 10371	6.49079	4.70575	3.4463	8.98e-06	0.00122556
DKK1	22943	dickkopf WNT signaling pathway inhibitor 1	11.9074	10.1362	3.41341	7.65e-06	0.00109376
ANXA9	8416	annexin A9	10.6485	8.906	3.34622	6.16e-06	0.000978554
WFS1	7466	Wolfram syndrome 1 (wolframin)	11.636	9.90672	3.31561	2.56e-05	0.00241472
SREBF1	6720	sterol regulatory element binding transcription factor 1	12.6256	10.9002	3.30663	3.83e-05	0.00320722
STEAP4	79689	STEAP family member 4	9.24943	7.52506	3.30436	2.2e-06	0.000468563
MCTP1	79772	multiple C2 domains, transmembrane 1	11.8313	10.1103	3.29675	1.72e-05	0.00182037
SERPINA5	5104	serpin peptidase inhibitor, clade A (alpha-1 antiproteinase, antitrypsin), member 5	5.20568	3.49401	3.27541	9.94e-05	0.00617925
PTPN13	5783	protein tyrosine phosphatase, non-receptor type 13 (APO-1/CD95 (Fas)-associated phosphatase)	9.32993	7.63504	3.23751	6.76e-06	0.00104918
HOXB9	3219	homeobox B9	12.691	11.0042	3.21955	4.58e-06	0.00079831
PTGS1	5742	prostaglandin-endoperoxide synthase 1 (prostaglandin G/H synthase and cyclooxygenase)	8.73407	7.05234	3.20811	0.000166763	0.00853633
SMC6		Transcript Identified by AceView, Entrez Gene ID(s) 79677	4.48839	2.81058	3.19943	0.0710681	0.327307
CLCN7	1186	chloride channel, voltage-sensitive 7	9.52055	7.84662	3.19082	1.23e-05	0.00151151
LRIG1			9.50013	7.82721	3.18859	5.67e-05	0.0042644
RAPGEF3	10411	Rap guanine nucleotide exchange factor 3	6.76389	5.10034	3.16795	0.000196358	0.00944962
GATA2	2624	GATA binding protein 2	6.12854	4.48981	3.11393	0.00193145	0.0402973
BCAM	4059	basal cell adhesion molecule (Lutheran blood group)	9.37667	7.74735	3.09367	1.86e-05	0.00193073
PLXNA2	5362	plexin A2	8.22906	6.61303	3.0653	1.3e-05	0.00153519
ATP11A	23250	ATPase, class VI, type 11A	9.96805	8.3532	3.0628	6.8e-06	0.00104918
SLITRK6	84189	SLIT and NTRK-like family, member 6	14.9496	13.3482	3.03452	9.1e-06	0.00122769
ZNF703	80139	zinc finger protein 703	6.61046	5.01794	3.01575	8.6e-05	0.00567578
EPN3	55040	epsin 3	6.00971	4.4262	2.99699	3.07e-05	0.00272048
PTMS	5763	parathymosin	12.6851	11.1024	2.99528	3.95e-06	0.000699808
PTK7	5754	protein tyrosine kinase 7 (inactive)	8.61002	7.03328	2.98294	4.64e-05	0.00367103
CEMIP	57214	cell migration inducing protein, hyaluronan binding	11.0998	9.52543	2.97801	7.43e-06	0.00108948
ARSD	414	arylsulfatase D	11.2533	9.68509	2.9653	7.47e-06	0.00108948
STXBP6	29091	syntaxin binding protein 6 (amisyn)	8.51865	6.9707	2.924	0.00138545	0.0332299
F2R	2149	coagulation factor II (thrombin) receptor	7.93008	6.39025	2.90762	9.1e-05	0.00585728
CLDN2	9075	claudin 2	10.0699	8.53383	2.90011	1.02e-05	0.00131215
SOX9	6662	SRY box 9	11.325	9.79165	2.89462	3.05e-05	0.00272048
KIAA1161	57462	KIAA1161	10.549	9.03284	2.86023	0.000140825	0.00768551
GALNT11	63917	polypeptide N-acetylgalactosaminyltransferase 11	7.49729	5.98367	2.85525	0.000212465	0.00982762
CLEC3A	10143	C-type lectin domain family 3, member A	8.79438	7.28348	2.84988	0.00104137	0.0274728
ADAMTS6	11174	ADAM metallopeptidase with thrombospondin type 1 motif 6	11.6242	10.118	2.84075	2.13e-05	0.00211114
LAMB1	3912	laminin, beta 1	11.4894	9.99665	2.81432	9.45e-06	0.00125052
NT5C3B	115024	5-nucleotidase, cytosolic IIIB	10.9004	9.4077	2.81409	0.000131193	0.00731671
EPHX1	2052	epoxide hydrolase 1, microsomal (xenobiotic)	12.4255	10.9362	2.8076	3.67e-06	0.000663958
NHS	4810	Nance-Horan syndrome (congenital cataracts and dental anomalies)	9.06615	7.57698	2.80727	0.000106131	0.00641209
ST6GAL1	6480	ST6 beta-galactosamide alpha-2,6-sialyltranferase 1	8.73346	7.25104	2.79416	1.29e-05	0.00153441
RING1	6015	ring finger protein 1	6.55822	5.08191	2.78236	0.0150238	0.138297
MEIS2	4212	Meis homeobox 2	11.5274	10.0624	2.76068	1.76e-05	0.00185156
MGAT5	4249	mannosyl (alpha-1,6-)-glycoprotein beta-1,6-N-acetyl-glucosaminyltransferase	11.3296	9.87319	2.74425	5.26e-05	0.00402539
MGAT4B	11282	mannosyl (alpha-1,3-)-glycoprotein beta-1,4-N-acetylglucosaminyltransferase, isozyme B	10.8771	9.42902	2.72836	2.71e-05	0.00250772
RBPMS	11030	RNA binding protein with multiple splicing	9.74231	8.30133	2.71505	0.00024642	0.0107205
GLIPR1	11010	GLI pathogenesis-related 1	6.98827	5.54906	2.71173	9.04e-05	0.0058389
ARID5B	84159	AT rich interactive domain 5B (MRF1-like)	12.3418	10.9034	2.71017	5.5e-05	0.0041716
LY75-CD302	100526664	LY75-CD302 readthrough	9.82643	8.39036	2.70583	6.73e-05	0.0047292
SLC38A11	151258	solute carrier family 38, member 11	11.0266	9.59099	2.70489	1.46e-05	0.00161855
SLCO1B3	28234	solute carrier organic anion transporter family, member 1B3	10.3227	8.88718	2.70483	8.87e-05	0.00579001
TTYH3	80727	tweety family member 3	10.3777	8.9436	2.70211	1.44e-05	0.00161558
BGN	633	biglycan	15.6769	14.256	2.67768	7.27e-06	0.00108948
ASAH1	427	N-acylsphingosine amidohydrolase (acid ceramidase) 1	11.9785	10.5579	2.67684	0.000341288	0.0132368
EFNB2	1948	ephrin-B2	10.1749	8.75681	2.6723	4.78e-05	0.00375812
RASGRF2	5924	Ras protein-specific guanine nucleotide-releasing factor 2	10.424	9.00759	2.66921	0.00118254	0.0297689
WWC1	23286	WW and C2 domain containing 1	11.2837	9.87183	2.66082	0.00105483	0.0276577
CTDSPL	10217	CTD small phosphatase like	12.9178	11.5078	2.65741	0.000142991	0.00773754
RNPEPL1	57140	arginyl aminopeptidase (aminopeptidase B)-like 1	9.36971	7.96103	2.65495	0.00262952	0.0494059
RASSF10	644943	Ras association (RalGDS/AF-6) domain family (N-terminal) member 10	7.58648	6.17956	2.6517	0.00113416	0.0289934
CXCR4	7852	chemokine (C-X-C motif) receptor 4	13.8541	12.4481	2.65006	3.34e-05	0.00291955
NOL4L	140688	nucleolar protein 4-like	11.668	10.2652	2.64419	7.49e-05	0.00504955
ESRRA	2101	estrogen-related receptor alpha	7.17976	5.77717	2.64375	0.00182549	0.0390587
ACOT4	122970	acyl-CoA thioesterase 4	5.13837	3.73677	2.64195	0.0037068	0.0612953
PRSS22	64063	protease, serine, 22	9.50485	8.10507	2.63861	0.000559195	0.018444
QPRT	23475	quinolinate phosphoribosyltransferase	8.17846	6.77948	2.63715	0.00629276	0.0830195
SIPA1L3	23094	signal-induced proliferation-associated 1 like 3	11.9507	10.5537	2.63349	9.28e-06	0.00124001
SDC1	6382	syndecan 1	10.3315	8.94012	2.62332	6.79e-05	0.00475717
LRP6	4040	LDL receptor related protein 6	7.7658	6.37478	2.62264	0.000120461	0.0069172
HOXB5	3215	homeobox B5	9.45489	8.06484	2.62088	2.16e-05	0.00213733
HCAR1	27198	hydroxycarboxylic acid receptor 1	12.2849	10.9025	2.60695	2.8e-05	0.00255227
ARHGEF17	9828	Rho guanine nucleotide exchange factor 17	7.27123	5.8897	2.60544	0.00133419	0.032481
PTPRF	5792	protein tyrosine phosphatase, receptor type, F	11.5312	10.1509	2.60335	5.45e-05	0.00414529
CACNA1D	776	calcium channel, voltage-dependent, L type, alpha 1D subunit	9.00374	7.64016	2.57324	4.1e-05	0.00336943
ASNS	440	asparagine synthetase (glutamine-hydrolyzing)	14.1652	12.802	2.57252	1.94e-05	0.00198656
FKBP2	2286	FK506 binding protein 2	10.235	8.87348	2.56966	0.0295664	0.202213
DDX26B	203522	DEAD/H (Asp-Glu-Ala-Asp/His) box polypeptide 26B	4.5	3.14058	2.56583	0.00230065	0.0452958
ZFP69B	65243	ZFP69 zinc finger protein B	5.95586	4.59862	2.56195	0.00162466	0.0364494
GALNT7	51809	polypeptide N-acetylgalactosaminyltransferase 7	12.1073	10.7537	2.55539	2.88e-05	0.00259245
MYO10	4651	myosin X	12.149	10.7985	2.55007	0.000109566	0.0065648
CFTR	1080	cystic fibrosis transmembrane conductance regulator	12.4056	11.0606	2.54027	1.65e-05	0.00177179
SMARCA4	6597	SWI/SNF related, matrix associated, actin dependent regulator of chromatin, subfamily a, member 4	10.5563	9.21576	2.53255	7.39e-05	0.00502089
PLXNA1	5361	plexin A1	10.148	8.80838	2.53086	0.000150497	0.00806965
TARBP1	6894	TAR (HIV-1) RNA binding protein 1	9.41605	8.07859	2.52706	0.00044841	0.0158967
MANSC1	54682	MANSC domain containing 1	11.9332	10.5966	2.52546	0.000607635	0.0196866
LRIG1			7.45537	6.12046	2.5226	0.00011141	0.00660086
NIPSNAP1	8508	nipsnap homolog 1 (C. elegans)	9.27472	7.94158	2.51952	0.00285935	0.05185
ANKRD50	57182	ankyrin repeat domain 50	9.26683	7.93972	2.50899	7.8e-05	0.00520862
SLC39A8	64116	solute carrier family 39 (zinc transporter), member 8	9.1833	7.85695	2.50767	4.3e-05	0.00345493
EPHB3	2049	EPH receptor B3	6.36565	5.04017	2.50615	0.000163481	0.0084085
UGDH	7358	UDP-glucose 6-dehydrogenase	14.751	13.429	2.50012	1.55e-05	0.00169187
RAB26	25837	RAB26, member RAS oncogene family	9.59388	8.27323	2.49779	0.00073838	0.0220568
PGAP3	93210	post-GPI attachment to proteins 3	8.54022	7.22061	2.49598	5.8e-05	0.00427398
DRAM1	55332	DNA-damage regulated autophagy modulator 1	7.68647	6.36703	2.49569	2.63e-05	0.00244905
RNF187	149603	ring finger protein 187	8.97435	7.65782	2.49066	3.19e-05	0.00281237
NHSL1	57224	NHS-like 1	7.72341	6.40721	2.4901	0.00204928	0.0419397
NCMAP	400746	noncompact myelin associated protein	9.18091	7.86678	2.48653	0.000171202	0.0086807
NFIB	4781	nuclear factor I/B	12.7973	11.4852	2.48303	0.00011564	0.00672151
LRP5	4041	LDL receptor related protein 5	12.1099	10.799	2.48104	0.000195434	0.00944068
VWA1	64856	von Willebrand factor A domain containing 1	7.99859	6.68767	2.48101	0.00551295	0.0767966
PLEKHG2	64857	pleckstrin homology domain containing, family G (with RhoGef domain) member 2	6.29065	4.9809	2.47899	0.0021992	0.0440801
CORO1B	57175	coronin, actin binding protein, 1B	11.1765	9.87215	2.46966	0.000301356	0.0122878
LAPTM4A		Memczak2013 ALT_ACCEPTOR, ALT_DONOR, coding, INTERNAL, intronic best transcript NM_014713	5.42739	4.12334	2.46921	0.110626	0.411355
EPPK1	83481	epiplakin 1	10.6685	9.36522	2.46794	0.000308841	0.0124746
BLOC1S1	2647	biogenesis of lysosomal organelles complex-1, subunit 1	13.9571	12.6569	2.46268	0.0191051	0.156998
RNF144B	255488	ring finger protein 144B	7.47066	6.17466	2.45547	2.83e-05	0.00257437
SRP72		Memczak2013 ANTISENSE, coding, INTERNAL, intronic best transcript NM_006947	6.49237	5.19643	2.45537	0.000103243	0.00634487
ZNRF3	84133	zinc and ring finger 3	9.47465	8.18003	2.45314	1.99e-05	0.00203181
TBXAS1	6916	thromboxane A synthase 1 (platelet)	12.4805	11.187	2.45133	0.00121835	0.030389
IFNE	338376	interferon, epsilon	8.77088	7.47872	2.44894	0.000129042	0.00725054
CP	1356	ceruloplasmin (ferroxidase)	7.11675	5.825	2.44825	0.00168459	0.0373516
RHOBTB3	22836	Rho-related BTB domain containing 3	7.25301	5.96342	2.4446	8.88e-05	0.00579001
CNIH2	254263	cornichon family AMPA receptor auxiliary protein 2	5.02228	3.73291	2.44421	0.00709582	0.0886042
BST2	684	bone marrow stromal cell antigen 2	8.459	7.17122	2.44152	0.0079984	0.0944247
IL20RA	53832	interleukin 20 receptor, alpha	6.02247	4.74913	2.4172	0.000131668	0.00731671
ITGB5	3693	integrin beta 5	10.8734	9.60435	2.41002	0.000124325	0.00707298
BDNF	627	brain-derived neurotrophic factor	6.11942	4.85218	2.40701	0.00582679	0.0796645
IGF2R	3482	insulin-like growth factor 2 receptor	10.1385	8.87344	2.40338	0.000418581	0.0152943
FASN	2194	fatty acid synthase	11.9241	10.6597	2.40234	2.27e-05	0.00223176
ZFP36L1	677	ZFP36 ring finger protein-like 1	11.8512	10.5902	2.39674	4.01e-05	0.00331739
PARP11	57097	poly(ADP-ribose) polymerase family member 11	8.13833	6.8822	2.38855	0.0137862	0.131809
PCGF2	7703	polycomb group ring finger 2	10.1308	8.87603	2.38625	6.66e-05	0.00471559
ZNF827	152485	zinc finger protein 827	8.10897	6.85435	2.38604	0.00192669	0.0402765
INTS1	26173	integrator complex subunit 1	8.67451	7.42057	2.38492	0.000100409	0.00622328
KHDRBS1	10657	KH domain containing, RNA binding, signal transduction associated 1	12.7488	11.4967	2.38197	7.06e-05	0.00490167
C16orf62	57020	chromosome 16 open reading frame 62	5.33953	4.08847	2.38017	0.000280657	0.0117569
MAN2B2	23324	mannosidase, alpha, class 2B, member 2	10.4765	9.22678	2.37788	3.9e-05	0.00325109
PHACTR2	9749	phosphatase and actin regulator 2	8.46401	7.21442	2.37773	0.000766606	0.0227731
FMN1	342184	formin 1	6.86343	5.61746	2.37179	6.42e-05	0.00461591
ANKH	56172	ANKH inorganic pyrophosphate transport regulator	10.8625	9.61845	2.36855	0.000401531	0.0148483
DNASE2	1777	deoxyribonuclease II, lysosomal	7.62758	6.38558	2.36525	0.000156358	0.0082397
KIF1C	10749	kinesin family member 1C	9.54106	8.3005	2.3629	0.000345145	0.0133622
GATAD2A	54815	GATA zinc finger domain containing 2A	8.90523	7.66702	2.35905	0.000386598	0.0145214
GMDS	2762	GDP-mannose 4,6-dehydratase	9.56507	8.32931	2.35505	9.62e-05	0.00604746
C4orf19	55286	chromosome 4 open reading frame 19	9.51474	8.27966	2.35393	0.00612928	0.0820092
SLC12A7	10723	solute carrier family 12 (potassium/chloride transporter), member 7	12.0569	10.8259	2.34724	3.2e-05	0.00281237
FMN1	342184	formin 1	7.36972	6.14085	2.34382	7.21e-05	0.00492724
DAB2IP	153090	DAB2 interacting protein	8.07559	6.84991	2.33866	0.0437951	0.251693
VAT1	10493	vesicle amine transport 1	11.5667	10.3432	2.33519	0.000210148	0.00979276
SLC7A5	8140	solute carrier family 7 (amino acid transporter light chain, L system), member 5	13.8252	12.6026	2.33362	0.000145766	0.00785527
NAALADL2	254827	N-acetylated alpha-linked acidic dipeptidase-like 2	10.2963	9.07496	2.33159	0.000274027	0.0115923
CD44	960	CD44 molecule (Indian blood group)	13.1914	11.9721	2.32828	0.00116877	0.0295983
VCL	7414	vinculin	11.0149	9.80143	2.31897	0.000138066	0.00761246
PLCXD1	55344	phosphatidylinositol-specific phospholipase C, X domain containing 1	5.80785	4.59539	2.31733	0.00674701	0.0863939
ROCK2	9475	Rho-associated, coiled-coil containing protein kinase 2	13.5214	12.3108	2.31432	0.00056941	0.0187024
ATP6V1B1	525	ATPase, H+ transporting, lysosomal 56/58kDa, V1 subunit B1	10.4608	9.25035	2.31407	0.01965	0.158863
HOXB6	3216	homeobox B6	9.84125	8.6315	2.31297	0.00149467	0.0350355
RRM2B	50484	ribonucleotide reductase M2 B (TP53 inducible)	9.62966	8.42322	2.30768	0.00220929	0.0441611
ARSJ	79642	arylsulfatase family, member J	10.8544	9.64934	2.30542	0.000415263	0.0151989
POGZ		Transcript Identified by AceView, Entrez Gene ID(s) 23126	7.16326	5.95877	2.30456	0.000795168	0.0231878
QARS	5859	glutaminyl-tRNA synthetase	12.7898	11.5873	2.30137	0.0529284	0.279884
CMTM4	146223	CKLF-like MARVEL transmembrane domain containing 4	11.3163	10.1143	2.30063	0.000450905	0.0159331
PCYOX1L	78991	prenylcysteine oxidase 1 like	6.19568	4.99474	2.2989	0.00287899	0.0520207
FAM198B	51313	family with sequence similarity 198, member B	12.3018	11.1016	2.29773	6.1e-05	0.00443121
PTOV1	53635	prostate tumor overexpressed 1	8.69999	7.50023	2.29701	0.00705848	0.088429
ITPR3	3710	inositol 1,4,5-trisphosphate receptor, type 3	11.1004	9.90244	2.29409	7.69e-05	0.0051705
NOX1	27035	NADPH oxidase 1	11.8624	10.6653	2.29286	5.29e-05	0.00403425
PSAT1	29968	phosphoserine aminotransferase 1	14.2318	13.0404	2.28364	0.000122234	0.00697252
PHGDH	26227	phosphoglycerate dehydrogenase	10.3853	9.1958	2.28076	0.000163077	0.0084085
KLK6	5653	kallikrein related peptidase 6	14.2433	13.0538	2.28075	9.65e-05	0.00604746
ZHX2	22882	zinc fingers and homeoboxes 2	7.76332	6.5743	2.27997	0.000134214	0.00743829
CSPG4	1464	chondroitin sulfate proteoglycan 4	8.7023	7.51565	2.27623	0.000194708	0.00942687
SRGAP1	57522	SLIT-ROBO Rho GTPase activating protein 1	8.8878	7.70116	2.27621	0.000228489	0.0102524
EHD2	30846	EH domain containing 2	12.103	10.917	2.27536	3.49e-05	0.00300257
GRHL3	57822	grainyhead-like transcription factor 3	7.4722	6.29254	2.26524	0.0172556	0.149286
TEK	7010	TEK tyrosine kinase, endothelial	5.84864	4.6723	2.26003	0.00380323	0.062079
MFGE8	4240	milk fat globule-EGF factor 8 protein	13.0875	11.9116	2.25929	0.0009271	0.0257237
PTPRG	5793	protein tyrosine phosphatase, receptor type, G	4.6666	3.49371	2.25463	0.000685079	0.0212642
HNF1B	6928	HNF1 homeobox B	10.4047	9.233	2.25281	0.000157303	0.00825736
ADAM32	203102	ADAM metallopeptidase domain 32	4.91391	3.74269	2.25201	0.00195532	0.0407161
APTX	54840	aprataxin	5.70612	4.53827	2.24676	0.00768977	0.0926053
PLXND1	23129	plexin D1	10.698	9.53143	2.24482	0.000158637	0.00825836
ZNF710	374655	zinc finger protein 710	10.1317	8.96514	2.24473	8.17e-05	0.00543989
SMARCD2	6603	SWI/SNF related, matrix associated, actin dependent regulator of chromatin, subfamily d, member 2	13.3208	12.1555	2.24276	0.000139271	0.00762014
SYTL2	54843	synaptotagmin-like 2	9.93262	8.76905	2.2401	0.000105484	0.006391
TNRC18	84629	trinucleotide repeat containing 18	6.35465	5.19113	2.24004	0.0125619	0.124332
ZNF592	9640	zinc finger protein 592	11.3291	10.1663	2.23896	0.00438453	0.0667799
B4GALNT3	283358	beta-1,4-N-acetyl-galactosaminyl transferase 3	9.21684	8.05556	2.23655	0.000100684	0.00622328
ULBP1	80329	UL16 binding protein 1	7.11496	5.95405	2.23598	0.000483931	0.0167951
LPP	4026	LIM domain containing preferred translocation partner in lipoma	10.2773	9.1172	2.2347	0.000301824	0.0122878
ARHGAP23	57636	Rho GTPase activating protein 23	11.5396	10.3804	2.23319	5.73e-05	0.00427398
PROM2	150696	prominin 2	7.45749	6.30436	2.22396	0.000212608	0.00982762
AP3D1	8943	adaptor-related protein complex 3, delta 1 subunit	9.35118	8.19934	2.22197	0.000549455	0.0183065
SEMA4A	64218	sema domain, immunoglobulin domain (Ig), transmembrane domain (TM) and short cytoplasmic domain, (semaphorin) 4A	9.30083	8.14953	2.22113	5.18e-05	0.00399431
ST8SIA2	8128	ST8 alpha-N-acetyl-neuraminide alpha-2,8-sialyltransferase 2	5.31704	4.16896	2.21618	0.0044182	0.0671116
MARCH9	92979	membrane associated ring finger 9	7.35451	6.20728	2.21488	0.00475262	0.0702444
RASGEF1B	153020	RasGEF domain family member 1B	5.10081	3.95581	2.21145	0.0526516	0.279177
RCBTB2	1102	regulator of chromosome condensation (RCC1) and BTB (POZ) domain containing protein 2	5.19491	4.05252	2.20747	0.0201996	0.161356
TBC1D2B	23102	TBC1 domain family, member 2B	9.61122	8.46883	2.20746	0.000386586	0.0145214
GPX8	493869	glutathione peroxidase 8 (putative)	4.45438	3.31317	2.20566	0.00186889	0.0396872
GLMP	112770	glycosylated lysosomal membrane protein	9.91705	8.77733	2.20338	0.000360037	0.013764
MTA1	9112	metastasis associated 1	10.2013	9.06335	2.20071	0.000182837	0.00903569
PON3	5446	paraoxonase 3	6.76314	5.62585	2.19968	0.012084	0.121224
FRMD5	84978	FERM domain containing 5	8.40403	7.26681	2.19957	0.000393914	0.0146678
LGALS1	3956	lectin, galactoside-binding, soluble, 1	7.72137	6.58467	2.19877	3.36e-05	0.00291955
SORT1	6272	sortilin 1	12.0636	10.9286	2.19615	0.00038826	0.0145579
JDP2	122953	Jun dimerization protein 2	7.51036	6.3775	2.19292	0.000174329	0.00877702
FOXP4	116113	forkhead box P4	9.48556	8.35431	2.19048	8.51e-05	0.00563368
SULT1A2	6799	sulfotransferase family 1A member 2	9.67566	8.54923	2.18317	0.0185095	0.154725
FZD7	8324	frizzled class receptor 7	6.60786	5.48255	2.18149	0.00764484	0.0923235
EPHA1	2041	EPH receptor A1	7.91951	6.79599	2.17878	0.000126036	0.00713251
PARVA	55742	parvin, alpha	12.0231	10.9006	2.1772	0.000223125	0.0101175
SPRED2	200734	sprouty-related, EVH1 domain containing 2	11.112	9.99008	2.17631	8.25e-05	0.00548115
TMEM164	84187	transmembrane protein 164	9.39191	8.2729	2.17198	0.00799481	0.0944247
KMT2D	8085	lysine (K)-specific methyltransferase 2D	8.70538	7.58705	2.17096	0.000394762	0.0146739
PYGB	5834	phosphorylase, glycogen; brain	14.3158	13.1981	2.17001	0.000168912	0.00860528
SPATC1L	84221	spermatogenesis and centriole associated 1-like	5.01744	3.90007	2.16952	0.0509612	0.273802
TKFC	26007	triokinase/FMN cyclase	9.51193	8.39476	2.16921	0.0164528	0.145495
GALNT10	55568	polypeptide N-acetylgalactosaminyltransferase 10	7.3921	6.27504	2.16904	9.62e-05	0.00604746
NUDT9	53343	nudix hydrolase 9	7.09491	5.97832	2.16833	0.000837786	0.0239904
NACC1	112939	nucleus accumbens associated 1, BEN and BTB (POZ) domain containing	9.58042	8.46495	2.16665	0.000330387	0.0129546
HDAC9		Jeck2013 ALT_ACCEPTOR, ALT_DONOR, coding, INTERNAL, intronic best transcript NM_178423	3.72376	2.60863	2.16615	0.000673116	0.0210452
TRIM15	89870	tripartite motif containing 15	6.76494	5.6503	2.16541	0.00579924	0.0795282
CHST6	4166	carbohydrate (N-acetylglucosamine 6-O) sulfotransferase 6	5.06618	3.95166	2.16523	0.0118122	0.119636
DOCK11	139818	dedicator of cytokinesis 11	5.33989	4.22689	2.16294	0.00709088	0.0886042
TSPAN17	26262	tetraspanin 17	7.64409	6.53177	2.16193	0.00162392	0.0364494
NT5E	4907	5-nucleotidase, ecto (CD73)	13.8683	12.7577	2.15939	0.000243529	0.0106508
PLXNB1	5364	plexin B1	7.98713	6.87688	2.15883	0.000189029	0.00925636
H6PD	9563	hexose-6-phosphate dehydrogenase (glucose 1-dehydrogenase)	7.62186	6.51192	2.15836	0.00143856	0.0340931
NETO2	81831	neuropilin (NRP) and tolloid (TLL)-like 2	9.35249	8.24282	2.15797	0.00101037	0.0270529
PHLDB1	23187	pleckstrin homology-like domain, family B, member 1	9.52651	8.41887	2.15493	0.000918445	0.0256161
GYS1	2997	glycogen synthase 1 (muscle)	10.7103	9.60679	2.14878	0.000542758	0.0182273
PBX2	5089	pre-B-cell leukemia homeobox 2	9.10582	8.0051	2.14461	7.15e-05	0.00492633
ATP2C2	9914	ATPase, Ca++ transporting, type 2C, member 2	10.2586	9.15872	2.14338	0.000213509	0.00984804
SLC2A12	154091	solute carrier family 2 (facilitated glucose transporter), member 12	8.2862	7.18659	2.14296	0.00106169	0.0278036
CLDN10	9071	claudin 10	5.22711	4.12916	2.1405	0.000435566	0.0156845
ORAI2	80228	ORAI calcium release-activated calcium modulator 2	7.85151	6.75416	2.13962	0.00275723	0.0508549
BABAM1		Zhang2013 ALT_ACCEPTOR, ALT_DONOR, coding, INTERNAL, intronic best transcript NM_001033549	8.04191	6.94509	2.13883	0.0142723	0.134319
PAPSS2	9060	3-phosphoadenosine 5-phosphosulfate synthase 2	10.237	9.14443	2.13257	0.000500739	0.017111
GSTZ1	2954	glutathione S-transferase zeta 1	6.72703	5.63696	2.12885	0.00161607	0.0364494
ZNF516	9658	zinc finger protein 516	5.19589	4.10611	2.12843	0.194868	0.527725
CNGA1	1259	cyclic nucleotide gated channel alpha 1	6.69525	5.60551	2.12836	0.0561482	0.289272
MBNL3	55796	muscleblind-like splicing regulator 3	9.73129	8.64271	2.12664	0.000227292	0.0102416
EXOC3	11336	exocyst complex component 3	6.29612	5.20897	2.12455	0.0639503	0.310464
SERPINA4	5267	serpin peptidase inhibitor, clade A (alpha-1 antiproteinase, antitrypsin), member 4	8.05381	6.96833	2.12208	0.000918243	0.0256161
USP9Y	8287	ubiquitin specific peptidase 9, Y-linked	5.40719	4.32218	2.12139	0.0228392	0.173439
SF1	7536	splicing factor 1	7.06375	5.97971	2.11996	0.0243035	0.181106
SLC7A7	9056	solute carrier family 7 (amino acid transporter light chain, y+L system), member 7	6.11232	5.02877	2.11924	0.0327491	0.214786
LYRM5		Memczak2013 ANTISENSE, coding, INTERNAL, intronic best transcript NM_001001660	6.33978	5.25713	2.11792	0.126485	0.435965
FBXL17	64839	F-box and leucine-rich repeat protein 17	9.04551	7.9638	2.11654	0.000636696	0.0202067
CKB	1152	creatine kinase, brain	11.2603	10.1789	2.11608	0.00233946	0.0458493
ONECUT2	9480	one cut homeobox 2	9.45504	8.37487	2.11429	0.00358981	0.0601987
CFH	3075	complement factor H	9.77126	8.69132	2.11395	5.55e-05	0.00419249
PON2	5445	paraoxonase 2	12.3737	11.2945	2.11285	0.0047347	0.0700998
FOXA1	3169	forkhead box A1	11.9612	10.8825	2.11217	0.000207186	0.00973039
CBLC	23624	Cbl proto-oncogene C, E3 ubiquitin protein ligase	6.72752	5.64934	2.11137	0.000785684	0.0231676
ZBTB12	221527	zinc finger and BTB domain containing 12	6.50993	5.43214	2.1108	0.0025905	0.0488663
LATS2	26524	large tumor suppressor kinase 2	7.56539	6.48935	2.10824	0.00185374	0.0394434
DUSP6	1848	dual specificity phosphatase 6	12.1435	11.0678	2.10772	0.000473227	0.0165576
HOXB-AS3	404266	HOXB cluster antisense RNA 3	11.5524	10.4771	2.10708	0.00103521	0.0273904
ABCA2	20	ATP binding cassette subfamily A member 2	9.03153	7.9569	2.10617	0.00446678	0.0675587
CEACAM1	634	carcinoembryonic antigen-related cell adhesion molecule 1 (biliary glycoprotein)	15.5902	14.5163	2.10507	7.17e-05	0.00492633
HOXC13	3229	homeobox C13	5.01325	3.94029	2.10375	0.0017239	0.0378447
LIX1L	128077	limb and CNS expressed 1 like	7.1159	6.04344	2.10301	0.002176	0.0437136
ETV4	2118	ets variant 4	10.3703	9.29883	2.10163	0.000576074	0.0188636
CREG1	8804	cellular repressor of E1A-stimulated genes 1	11.2508	10.1802	2.10039	0.0870431	0.363847
SCAF11		Memczak2013 ANTISENSE, CDS, coding, INTERNAL best transcript NM_004719	9.38709	8.31737	2.09902	0.035171	0.223908
FILIP1L	11259	filamin A interacting protein 1-like	6.8724	5.80378	2.09743	0.00587661	0.0801282
UNG	7374	uracil DNA glycosylase	8.74575	7.67845	2.0955	0.0104308	0.111414
ITGB2		Memczak2013 ANTISENSE, CDS, coding, INTERNAL best transcript NM_001127491	5.014	3.94673	2.09546	0.0469773	0.261735
NDNF	79625	neuron-derived neurotrophic factor	4.85294	3.78631	2.09453	0.000910813	0.0255545
TLE4	7091	transducin-like enhancer of split 4	8.50452	7.43832	2.09391	0.000277778	0.0116865
FURIN	5045	furin (paired basic amino acid cleaving enzyme)	7.41458	6.34872	2.09342	0.000707981	0.0218172
CCDC129	223075	coiled-coil domain containing 129	5.84631	4.78093	2.09272	0.00112089	0.0287893
CABLES1	91768	Cdk5 and Abl enzyme substrate 1	11.6457	10.5806	2.09234	0.000442442	0.0158096
ZNF713	349075	zinc finger protein 713	5.8399	4.77522	2.0917	0.00354076	0.0596561
OR2W1	26692	olfactory receptor, family 2, subfamily W, member 1	3.7904	2.72597	2.09133	0.117393	0.422598
RYR3	6263	ryanodine receptor 3	3.96156	2.89747	2.09085	0.0314427	0.21016
LYN	4067	LYN proto-oncogene, Src family tyrosine kinase	4.32452	3.26043	2.09084	0.331623	0.667467
PTPRO	5800	protein tyrosine phosphatase, receptor type, O	6.99985	5.93688	2.08924	0.000235446	0.0104551
HSPG2	3339	heparan sulfate proteoglycan 2	10.4566	9.39421	2.08839	0.00117949	0.0297291
S100A14	57402	S100 calcium binding protein A14	10.3589	9.29665	2.08818	0.00225927	0.0447845
UQCR11	10975	ubiquinol-cytochrome c reductase, complex III subunit XI	11.7609	10.6989	2.08776	0.012104	0.121281
PACS2	23241	phosphofurin acidic cluster sorting protein 2	6.8242	5.7633	2.08624	0.00446787	0.0675587
RASSF9	9182	Ras association (RalGDS/AF-6) domain family (N-terminal) member 9	4.43607	3.37625	2.08468	0.00911063	0.10236
TET3	200424	tet methylcytosine dioxygenase 3	7.21736	6.15777	2.08433	0.0164596	0.145495
TNS2	23371	tensin 2	6.78062	5.72313	2.08131	0.000636876	0.0202067
COL27A1	85301	collagen, type XXVII, alpha 1	8.37475	7.31731	2.08124	5.75e-05	0.00427398
PLCZ1	89869	phospholipase C, zeta 1	4.85271	3.79531	2.08118	0.0150869	0.138568
MPRIP	23164	myosin phosphatase Rho interacting protein	11.539	10.4816	2.08116	0.000101089	0.00623035
FAM219B	57184	family with sequence similarity 219, member B	7.07463	6.01737	2.08098	0.000339871	0.0132096
POLR2G	5436	polymerase (RNA) II (DNA directed) polypeptide G	9.53021	8.47437	2.07893	0.0247773	0.18306
ADCY6	112	adenylate cyclase 6	9.95591	8.90032	2.07857	0.00290557	0.0524127
PHC2	1912	polyhomeotic homolog 2 (Drosophila)	10.0288	8.97614	2.07437	0.000270396	0.0115297
AP1B1	162	adaptor-related protein complex 1, beta 1 subunit	10.2151	9.1633	2.0731	0.000183521	0.00904864
ARSG	22901	arylsulfatase G	4.68189	3.63081	2.07208	0.0167593	0.146675
ZDHHC8	29801	zinc finger, DHHC-type containing 8	7.21625	6.16556	2.07152	0.049594	0.269153
MFSD12	126321	major facilitator superfamily domain containing 12	5.50967	4.45914	2.07129	0.0032215	0.0561289
CCND1	595	cyclin D1	10.8066	9.75684	2.0702	0.000112713	0.0066546
ARID1B	57492	AT rich interactive domain 1B (SWI1-like)	7.05349	6.00376	2.07015	0.000727268	0.0219387
NRG1	3084	neuregulin 1	4.29929	3.25031	2.06907	0.238961	0.579646
EPHB4	2050	EPH receptor B4	10.7804	9.73199	2.06821	0.000254685	0.0110353
WASH1	100287171	WAS protein family homolog 1	8.88484	7.83743	2.06682	0.000881483	0.0249749
RAPGEF4	11069	Rap guanine nucleotide exchange factor 4	4.51917	3.47346	2.06438	0.32748	0.664317
LINC01089	338799	long intergenic non-protein coding RNA 1089	8.35102	7.30578	2.06371	0.00876	0.0996206
SF3B2	10992	splicing factor 3b subunit 2	9.15073	8.10554	2.06364	0.00256216	0.0485029
ARHGAP15	55843	Rho GTPase activating protein 15	3.86493	2.82121	2.06154	0.229818	0.569514
GLMN	11146	glomulin, FKBP associated protein	5.84132	4.79837	2.06043	0.000432449	0.0156845
ABLIM1	3983	actin binding LIM protein 1	15.2708	14.2285	2.05955	0.000791894	0.0231676
CAMTA2	23125	calmodulin binding transcription activator 2	8.93773	7.89599	2.05872	0.00220113	0.0440801
PRRC2A	7916	proline-rich coiled-coil 2A	10.5595	9.52026	2.05519	0.000697319	0.0215506
HDAC7	51564	histone deacetylase 7	6.62843	5.59071	2.05298	0.00201599	0.0414165
SPRY3	10251	sprouty RTK signaling antagonist 3	6.201	5.16726	2.04732	0.00870326	0.0995029
SPRY3		Homo sapiens sprouty RTK signaling antagonist 3 (SPRY3), transcript variant 1, mRNA.	6.201	5.16726	2.04732	0.00870326	0.0995029
SMARCA5	8467	SWI/SNF related, matrix associated, actin dependent regulator of chromatin, subfamily a, member 5	12.0474	11.0137	2.0473	0.00106413	0.0278059
CCR7	1236	chemokine (C-C motif) receptor 7	3.85527	2.82226	2.04629	0.23048	0.570134
MSI2	124540	musashi RNA binding protein 2	11.1822	10.15	2.04519	9.84e-05	0.00613717
MAP2K5	5607	mitogen-activated protein kinase kinase 5	7.32687	6.29485	2.04488	0.00203916	0.0417727
FAM189B	10712	family with sequence similarity 189, member B	6.19936	5.16761	2.04451	0.000198927	0.00949596
STK39	27347	serine threonine kinase 39	13.129	12.0996	2.0412	0.00154117	0.0354424
GATAD1	57798	GATA zinc finger domain containing 1	12.025	10.996	2.04069	0.00028133	0.0117619
ERBB2	2064	erb-b2 receptor tyrosine kinase 2	7.3995	6.37168	2.03895	0.0037128	0.0612953
CORO1A	11151	coronin, actin binding protein, 1A	6.97897	5.95213	2.03755	0.00275677	0.0508549
SLC6A16	28968	solute carrier family 6, member 16	5.8098	4.78491	2.03481	0.00325928	0.0563396
CCDC92	80212	coiled-coil domain containing 92	8.05006	7.02517	2.0348	0.00217406	0.0437136
RBM12	10137	RNA binding motif protein 12	13.7493	12.7247	2.03436	0.00190756	0.0400718
HDAC5	10014	histone deacetylase 5	8.59021	7.56608	2.03374	0.0300613	0.204554
TOLLIP	54472	toll interacting protein	8.4249	7.40085	2.03362	0.0204968	0.162339
LZTS2	84445	leucine zipper, putative tumor suppressor 2	6.46542	5.44203	2.03269	0.0166193	0.145993
CD2BP2	10421	CD2 (cytoplasmic tail) binding protein 2	7.27691	6.2544	2.03145	0.00639552	0.0835391
TGOLN2	10618	trans-golgi network protein 2	12.496	11.4745	2.03004	0.000531439	0.0179908
YIPF7	285525	Yip1 domain family member 7	4.76556	3.7452	2.02843	0.283503	0.624984
DAB2	1601	Dab, mitogen-responsive phosphoprotein, homolog 2 (Drosophila)	7.23639	6.21721	2.02677	0.000670957	0.021039
HIBCH	26275	3-hydroxyisobutyryl-CoA hydrolase	9.42368	8.40604	2.02461	0.000777008	0.0229866
FRAS1	80144	Fraser extracellular matrix complex subunit 1	9.51075	8.49537	2.02144	0.00016489	0.00846065
HIPK2	28996	homeodomain interacting protein kinase 2	10.6605	9.64561	2.02081	0.000404743	0.0149157
FOXK1	221937	forkhead box K1	8.40084	7.38681	2.01955	0.000356767	0.0137114
HPGD	3248	hydroxyprostaglandin dehydrogenase 15-(NAD)	8.97014	7.95733	2.01783	0.372461	0.699768
ZBED3	84327	zinc finger, BED-type containing 3	7.07875	6.06749	2.01567	0.0323683	0.213217
SP6	80320	Sp6 transcription factor	7.87624	6.86603	2.01421	0.00480353	0.0706626
PRKX	5613	protein kinase, X-linked	8.41514	7.40548	2.01343	0.00176309	0.0384974
NUP210	23225	nucleoporin 210kDa	8.7934	7.78404	2.01301	0.00234291	0.0458493
QRICH2	84074	glutamine rich 2	5.12514	4.11688	2.01148	0.0593895	0.297892
ARID1A	8289	AT rich interactive domain 1A (SWI-like)	10.0152	9.00851	2.00933	0.000327045	0.0128706
C16orf72		Memczak2013 ANTISENSE, coding, INTERNAL, intronic best transcript NM_014117	6.33461	5.32834	2.00871	0.00804792	0.0945818
SCAMP5	192683	secretory carrier membrane protein 5	4.0257	3.0197	2.00834	0.103712	0.398218
WNK4	65266	WNK lysine deficient protein kinase 4	6.43239	5.42764	2.00661	0.000642644	0.0203295
RGL2	5863	ral guanine nucleotide dissociation stimulator-like 2	10.2786	9.27388	2.00658	0.000155333	0.00820588
ZNF860	344787	zinc finger protein 860	8.21556	7.21145	2.0057	0.00102603	0.0272693
PLS3	5358	plastin 3	10.5552	9.55115	2.00558	0.00400708	0.063615
AP2A2	161	adaptor-related protein complex 2, alpha 2 subunit	12.0592	11.056	2.00435	0.000110946	0.00659161
EBPL	84650	emopamil binding protein-like	11.2395	10.2367	2.00389	0.0524571	0.27849
BCR	613	breakpoint cluster region	8.35667	7.35406	2.00363	0.000381238	0.0144175
OSBPL10	114884	oxysterol binding protein-like 10	11.6217	10.6194	2.00324	0.000191035	0.00933329
SCAF4	57466	SR-related CTD-associated factor 4	11.2668	10.2646	2.00303	0.0111006	0.1156
DYNC1H1	1778	dynein, cytoplasmic 1, heavy chain 1	11.3827	10.3809	2.00253	0.000823629	0.0237435
ZKSCAN5	23660	zinc finger with KRAB and SCAN domains 5	7.44814	6.44801	2.00018	0.101373	0.3936
FREM2	341640	FRAS1 related extracellular matrix protein 2	7.59858	6.59862	1.99995	0.000583557	0.0190106
USP46	64854	ubiquitin specific peptidase 46	8.6399	7.64009	1.99975	0.000260359	0.0112358
FBL	2091	fibrillarin	14.7112	13.7116	1.99946	0.00142067	0.0338374
PANK2	80025	pantothenate kinase 2	6.25579	5.2566	1.99889	0.0203769	0.162048
CC2D2A		Transcript Identified by AceView, Entrez Gene ID(s) 57545	4.49279	3.494	1.99832	0.042169	0.246509
SH3BGRL	6451	SH3 domain binding glutamate-rich protein like	10.7456	9.74686	1.99824	0.00276862	0.0509712
CD99L2	83692	CD99 molecule-like 2	5.93922	4.94135	1.99705	0.00772382	0.092807
ATP8B1	5205	ATPase, aminophospholipid transporter, class I, type 8B, member 1	12.2894	11.2925	1.99581	0.000984909	0.0267735
RERE	473	arginine-glutamic acid dipeptide (RE) repeats	9.0164	8.01983	1.99525	0.000197773	0.0094684
SMG9	56006	SMG9 nonsense mediated mRNA decay factor	8.14083	7.14477	1.99455	0.00362201	0.0603861
FAM222B	55731	family with sequence similarity 222, member B	6.61317	5.61732	1.99426	0.00164057	0.0366768
ERP29	10961	endoplasmic reticulum protein 29	8.63088	7.6354	1.99375	0.00153113	0.03535
CIRBP	1153	cold inducible RNA binding protein	11.1296	10.1343	1.9935	0.00603595	0.0814721
COBLL1	22837	cordon-bleu WH2 repeat protein like 1	11.3681	10.3728	1.99339	0.00317679	0.055521
CHD3	1107	chromodomain helicase DNA binding protein 3	7.67825	6.68328	1.99304	0.000232879	0.0104058
P3H4	10609	prolyl 3-hydroxylase family member 4 (non-enzymatic)	7.54327	6.54923	1.99176	0.00180084	0.0388669
ANK3	288	ankyrin 3, node of Ranvier (ankyrin G)	10.9053	9.91127	1.99174	0.0002406	0.01064
TOX3	27324	TOX high mobility group box family member 3	11.0715	10.0778	1.99131	0.000310124	0.0124794
SMARCD1	6602	SWI/SNF related, matrix associated, actin dependent regulator of chromatin, subfamily d, member 1	10.3518	9.35846	1.99077	0.000187799	0.00921721
KLF15	28999	Kruppel-like factor 15	6.65196	5.6588	1.99054	0.00635947	0.0833947
ARHGDIA	396	Rho GDP dissociation inhibitor (GDI) alpha	11.5703	10.578	1.98939	0.000382372	0.0144175
MMP15	4324	matrix metallopeptidase 15 (membrane-inserted)	9.79847	8.80657	1.9888	0.00263126	0.0494059
TBC1D24	57465	TBC1 domain family, member 24	6.66108	5.66949	1.98838	0.000284955	0.0118245
PPP1R9B	84687	protein phosphatase 1, regulatory subunit 9B	6.75163	5.76322	1.98399	0.00110576	0.0285053
ADGRG1	9289	adhesion G protein-coupled receptor G1	12.7566	11.7691	1.98279	0.000320388	0.0127489
CDCA7	83879	cell division cycle associated 7	9.21484	8.22731	1.98278	0.000109577	0.0065648
BCORL1	63035	BCL6 corepressor-like 1	8.0061	7.02	1.98082	0.00774183	0.0928673
NF2	4771	neurofibromin 2 (merlin)	8.63365	7.64837	1.9797	0.00324631	0.0562414
PDE8A	5151	phosphodiesterase 8A	9.63035	8.64606	1.97835	0.00343079	0.0584925
NACC2	138151	NACC family member 2, BEN and BTB (POZ) domain containing	5.38485	4.40118	1.97749	0.00481606	0.0707499
ARFGEF3	57221	ARFGEF family member 3	8.76527	7.78203	1.9769	0.00601945	0.0814721
DDAH2	23564	dimethylarginine dimethylaminohydrolase 2	9.7381	8.75588	1.9755	0.0522149	0.277892
KDM2B	84678	lysine (K)-specific demethylase 2B	7.48798	6.5072	1.97354	0.0171551	0.148844
C6orf10	10665	chromosome 6 open reading frame 10	3.72481	2.74458	1.97278	0.0680207	0.319936
SLC25A12	8604	solute carrier family 25 (aspartate/glutamate carrier), member 12	9.09758	8.11736	1.97277	0.0469798	0.261735
ALDH6A1	4329	aldehyde dehydrogenase 6 family, member A1	6.91287	5.93518	1.9693	0.00340252	0.0582421
PKP2	5318	plakophilin 2	13.1284	12.1508	1.96912	0.00063232	0.0201816
ESPNL	339768	espin-like	6.348	5.3735	1.96496	0.154075	0.475575
FAM213B		Memczak2013 ANTISENSE, coding, INTERNAL, UTR3 best transcript NM_001195737	5.76521	4.79198	1.96323	0.0125601	0.124332
PBX1	5087	pre-B-cell leukemia homeobox 1	7.73566	6.76278	1.96275	0.0107667	0.113532
CERCAM	51148	cerebral endothelial cell adhesion molecule	4.86112	3.88832	1.96265	0.00629918	0.0830195
ZNF580	51157	zinc finger protein 580	5.51653	4.54389	1.96242	0.146893	0.46519
PLK2	10769	polo-like kinase 2	15.5009	14.5289	1.96149	0.000217909	0.00998657
CCDC183	84960	coiled-coil domain containing 183	12.4324	11.4616	1.95989	0.0014632	0.0346006
CLHC1	130162	clathrin heavy chain linker domain containing 1	5.29896	4.32875	1.95913	0.651409	0.868167
CTSZ	1522	cathepsin Z	13.6287	12.6627	1.95341	0.000450923	0.0159331
NEDD4L	23327	neural precursor cell expressed, developmentally down-regulated 4-like, E3 ubiquitin protein ligase	12.8948	11.9299	1.95195	0.00112941	0.0289063
CLSTN1	22883	calsyntenin 1	11.8314	10.8685	1.94917	0.000728786	0.0219536
GPER1	2852	G protein-coupled estrogen receptor 1	4.51512	3.55253	1.9488	0.000672021	0.0210416
SLC12A2	6558	solute carrier family 12 (sodium/potassium/chloride transporter), member 2	16.5841	15.6225	1.94748	0.000228353	0.0102524
MARVELD1	83742	MARVEL domain containing 1	8.61033	7.64923	1.94678	0.000338072	0.0132013
RBMS2	5939	RNA binding motif, single stranded interacting protein 2	9.82561	8.86598	1.94482	0.0042935	0.0661441
NISCH	11188	nischarin	7.56679	6.60788	1.94383	0.00142826	0.0339411
CEP170	9859	centrosomal protein 170kDa	9.13078	8.17224	1.94334	0.0534619	0.281525
DNTTIP1	116092	deoxynucleotidyltransferase, terminal, interacting protein 1	10.1793	9.22103	1.94293	0.0104905	0.11179
MORC4	79710	MORC family CW-type zinc finger 4	8.85935	7.90173	1.94211	0.00200124	0.0412322
C16orf52	730094	chromosome 16 open reading frame 52	8.67092	7.71395	1.94123	0.000679284	0.0211763
ANXA6	309	annexin A6	6.48275	5.52628	1.94056	0.0313798	0.209995
KCNC3	3748	potassium channel, voltage gated Shaw related subfamily C, member 3	5.86081	4.905	1.93966	0.00310676	0.0550238
STX4	6810	syntaxin 4	8.36767	7.41201	1.93946	0.00118473	0.029789
ZNF318	24149	zinc finger protein 318	7.37187	6.41859	1.93628	0.00159374	0.036203
MEGF9	1955	multiple EGF-like-domains 9	5.7189	4.76593	1.93585	0.0118222	0.119662
CHKA	1119	choline kinase alpha	11.6786	10.7257	1.9357	0.00216072	0.0435966
CCDC102B	79839	coiled-coil domain containing 102B	4.30982	3.35718	1.9354	0.105188	0.400793
SLC35D2	11046	solute carrier family 35 (UDP-GlcNAc/UDP-glucose transporter), member D2	10.973	10.0207	1.93493	0.0258975	0.187191
OGFOD3	79701	2-oxoglutarate and iron-dependent oxygenase domain containing 3	6.38901	5.43736	1.93408	0.000647905	0.0204057
VPS26B	112936	VPS26 retromer complex component B	10.7829	9.83296	1.93181	0.00126479	0.0311448
RAI1	10743	retinoic acid induced 1	7.94275	6.99467	1.9293	0.0162589	0.144398
TSPAN9	10867	tetraspanin 9	7.88049	6.93324	1.92819	0.000550245	0.0183065
NCOR2	9612	nuclear receptor corepressor 2	9.62162	8.67483	1.92758	0.000315126	0.0126333
FRRS1	391059	ferric-chelate reductase 1	9.38948	8.44285	1.92736	0.000791023	0.0231676
LAMP1	3916	lysosomal-associated membrane protein 1	10.8709	9.92433	1.92734	0.000360656	0.013764
PPL	5493	periplakin	7.86923	6.92281	1.92708	0.000719328	0.0218608
RAB13	5872	RAB13, member RAS oncogene family	11.5384	10.5922	1.92679	0.000277887	0.0116865
LRRC58		Memczak2013 ANTISENSE, CDS, coding, INTERNAL, intronic, UTR3 best transcript NM_001099678	6.48292	5.53699	1.92643	0.0167163	0.146459
PEX1	5189	peroxisomal biogenesis factor 1	8.55392	7.60813	1.92624	0.0035338	0.0595857
METTL7B	196410	methyltransferase like 7B	9.8875	8.94204	1.9258	0.00947408	0.104703
PIK3R3	8503	phosphoinositide-3-kinase, regulatory subunit 3 (gamma)	8.05038	7.10543	1.92512	0.0158678	0.142458
HTR3E	285242	5-hydroxytryptamine (serotonin) receptor 3E, ionotropic	4.62527	3.68155	1.92348	0.170488	0.49845
PRKCA	5578	protein kinase C, alpha	7.41052	6.4669	1.92335	0.00155013	0.0355966
HOXB3	3213	homeobox B3	11.6657	10.723	1.92222	0.0118604	0.119822
USP13	8975	ubiquitin specific peptidase 13 (isopeptidase T-3)	6.74904	5.8072	1.92097	0.00548403	0.0765267
FAM195B	348262	family with sequence similarity 195, member B	7.67223	6.73043	1.92093	0.0107002	0.113017
NFASC	23114	neurofascin	3.8488	2.90817	1.91936	0.00698762	0.0880644
OPHN1	4983	oligophrenin 1	7.33165	6.39122	1.91911	0.0022714	0.0449418
SMARCC1	6599	SWI/SNF related, matrix associated, actin dependent regulator of chromatin, subfamily c, member 1	12.1136	11.1732	1.91899	0.000267799	0.0114418
NUP188		Memczak2013 ANTISENSE, coding, INTERNAL, UTR3 best transcript NM_015354	6.25044	5.3104	1.91858	0.491053	0.780651
SNX27	81609	sorting nexin family member 27	10.999	10.0591	1.91833	0.000352741	0.0135827
PYROXD2	84795	pyridine nucleotide-disulphide oxidoreductase domain 2	7.54665	6.60757	1.9173	0.00577668	0.0793202
RAB3D	9545	RAB3D, member RAS oncogene family	10.1088	9.16988	1.91709	0.00115737	0.0294464
TNS4	84951	tensin 4	11.7543	10.8161	1.91616	0.000721815	0.0218608
CBX6	23466	chromobox homolog 6	5.8373	4.89939	1.91574	0.00214143	0.0433296
ZFP36L2	678	ZFP36 ring finger protein-like 2	13.3186	12.3816	1.91453	0.000297539	0.0122253
FRMPD2B	728798	FERM and PDZ domain containing 2B, pseudogene	4.48001	3.54306	1.91448	0.0177173	0.151334
FAM3D	131177	family with sequence similarity 3, member D	8.08804	7.15123	1.91428	0.0311183	0.209184
CNN2	1265	calponin 2	11.5728	10.6366	1.91347	0.000221	0.0100424
NOA1	84273	nitric oxide associated 1	12.2429	11.3074	1.91259	0.000951041	0.0261544
PNPLA4	8228	patatin-like phospholipase domain containing 4	6.30432	5.36994	1.91107	0.112521	0.415022
PTPN9	5780	protein tyrosine phosphatase, non-receptor type 9	8.9356	8.00172	1.91041	0.0110083	0.115062
ABCG2	9429	ATP binding cassette subfamily G member 2 (Junior blood group)	10.2053	9.27209	1.90958	0.0295202	0.202054
SURF1	6834	surfeit 1	6.91651	5.98351	1.90923	0.000612859	0.0197682
PRRT1	80863	proline-rich transmembrane protein 1	5.95385	5.02149	1.90839	0.13153	0.443684
KSR2	283455	kinase suppressor of ras 2	6.6083	5.67688	1.90715	0.056681	0.290261
TCEB2	6923	transcription elongation factor B (SIII), polypeptide 2 (18kDa, elongin B)	9.90866	8.97828	1.90579	0.418225	0.733385
NBEAL2	23218	neurobeachin like 2	9.25361	8.32519	1.90319	0.0046382	0.0692276
OR2T3	343173	olfactory receptor, family 2, subfamily T, member 3	5.58775	4.66036	1.90184	0.00996836	0.108309
POLR2A	5430	polymerase (RNA) II (DNA directed) polypeptide A, 220kDa	10.9419	10.0148	1.90149	0.000518521	0.0176527
TM4SF19-AS1	100874214	TM4SF19 antisense RNA 1	7.93729	7.01039	1.90119	0.208441	0.543487
ZFHX3	463	zinc finger homeobox 3	7.07773	6.15088	1.90111	0.000300366	0.0122878
FCGRT	2217	Fc fragment of IgG, receptor, transporter, alpha	7.35433	6.42773	1.90079	0.0560775	0.289123
NMRK1	54981	nicotinamide riboside kinase 1	8.88667	7.96118	1.89933	0.119368	0.425209
UNC93B1	81622	unc-93 homolog B1 (C. elegans)	10.2173	9.29189	1.89919	0.00215739	0.0435704
ABCB9	23457	ATP binding cassette subfamily B member 9	4.3365	3.41192	1.89813	0.0562436	0.289423
TCF7L2	6934	transcription factor 7-like 2 (T-cell specific, HMG-box)	8.64776	7.72445	1.89647	0.00728656	0.0899725
MARK4	57787	MAP/microtubule affinity-regulating kinase 4	8.96379	8.04068	1.89619	0.00438399	0.0667799
BRMS1L		Transcript Identified by AceView, Entrez Gene ID(s) 84312	5.73766	4.81461	1.89611	0.00137484	0.0330949
FAM89B	23625	family with sequence similarity 89, member B	9.95763	9.03562	1.89475	0.0119424	0.120311
TMEM8A	58986	transmembrane protein 8A	10.4026	9.48117	1.89397	0.00109313	0.0282815
PRKG1		Memczak2013 ALT_ACCEPTOR, ALT_DONOR, coding, INTERNAL, intronic best transcript NM_001098512	4.5985	3.67807	1.89267	0.0871736	0.364182
L3MBTL3	84456	l(3)mbt-like 3 (Drosophila)	7.86563	6.94612	1.89147	0.00684876	0.0871246
SEMA3E	9723	sema domain, immunoglobulin domain (Ig), short basic domain, secreted, (semaphorin) 3E	8.87185	7.95427	1.88894	0.00267568	0.0499895
TBC1D1	23216	TBC1 (tre-2/USP6, BUB2, cdc16) domain family, member 1	9.39436	8.47695	1.88872	0.000242373	0.0106508
PPP1R10	5514	protein phosphatase 1, regulatory subunit 10	11.069	10.1518	1.88842	0.00190392	0.0400718
NR2F1	7025	nuclear receptor subfamily 2, group F, member 1	7.66285	6.74659	1.88721	0.00413793	0.0646569
HNRNPLL	92906	heterogeneous nuclear ribonucleoprotein L-like	9.30471	8.38986	1.88537	0.00873901	0.0995768
PGLS	25796	6-phosphogluconolactonase	8.91494	8.00021	1.88522	0.00643157	0.0837549
LRP6	4040	LDL receptor related protein 6	8.77284	7.85848	1.88473	0.00253518	0.0482044
ARPIN	348110	actin-related protein 2/3 complex inhibitor	8.23641	7.32223	1.88449	0.000612465	0.0197682
ARHGEF1	9138	Rho guanine nucleotide exchange factor 1	5.6074	4.69356	1.88406	0.0153236	0.140035
TSPAN6	7105	tetraspanin 6	11.0979	10.1852	1.88257	0.0168913	0.147457
SLC44A1	23446	solute carrier family 44 (choline transporter), member 1	11.1394	10.2272	1.88191	0.000670803	0.021039
ACPP	55	acid phosphatase, prostate	5.56228	4.65015	1.88182	0.0103839	0.111139
KREMEN1	83999	kringle containing transmembrane protein 1	8.74655	7.83514	1.88088	0.000887227	0.0250986
FUS	2521	FUS RNA binding protein	11.8526	10.9415	1.88048	0.00169283	0.0373537
TST	7263	thiosulfate sulfurtransferase (rhodanese)	10.2984	9.38751	1.88017	0.00375412	0.0615583
FAM107B	83641	family with sequence similarity 107, member B	9.30307	8.39247	1.87982	0.0217576	0.16859
ZNF512	84450	zinc finger protein 512	8.40788	7.49738	1.87969	0.0265217	0.190183
YAP1	10413	Yes-associated protein 1	10.9998	10.0898	1.87915	0.00388378	0.0628673
KLRAP1	10748	killer cell lectin-like receptor subfamily A pseudogene 1	5.35986	4.44987	1.87903	0.119785	0.425809
PLCXD1	55344	phosphatidylinositol-specific phospholipase C, X domain containing 1	5.85794	4.94826	1.87864	0.00495473	0.0720468
CD82	3732	CD82 molecule	12.3374	11.4281	1.87817	0.000796785	0.0231878
CPD	1362	carboxypeptidase D	10.7339	9.82483	1.87786	0.00479526	0.0706626
ABHD17C	58489	abhydrolase domain containing 17C	9.41342	8.5046	1.87751	0.00243938	0.0472627
CCNJL	79616	cyclin J-like	7.29882	6.39054	1.87681	0.00155718	0.0356439
HMGN5	79366	high mobility group nucleosome binding domain 5	7.07522	6.1672	1.87647	0.00625259	0.0827813
PTGFRN	5738	prostaglandin F2 receptor inhibitor	9.13989	8.23212	1.87614	0.00399603	0.0635133
C1orf21	81563	chromosome 1 open reading frame 21	11.4326	10.525	1.87597	0.000624557	0.0199933
CLSTN3	9746	calsyntenin 3	6.32629	5.41992	1.87432	0.015579	0.141062
MANSC1	54682	MANSC domain containing 1	6.69121	5.78485	1.87431	0.00253091	0.0482044
PGBD4	161779	piggyBac transposable element derived 4	7.84888	6.94273	1.87403	0.00690185	0.0876822
AP2A1	160	adaptor-related protein complex 2, alpha 1 subunit	7.95885	7.05468	1.87147	0.00372195	0.0613121
FARP1	10160	FERM, ARH/RhoGEF and pleckstrin domain protein 1	12.9497	12.0467	1.86986	0.000546694	0.0182925
TPMT	7172	thiopurine S-methyltransferase	11.5839	10.6813	1.86935	0.071245	0.32791
LYZL6	57151	lysozyme-like 6	4.60846	3.70634	1.86881	0.0346704	0.221577
AC008753.6			5.23857	4.33657	1.86866	0.109833	0.410183
ZDHHC18	84243	zinc finger, DHHC-type containing 18	10.2906	9.38917	1.86793	0.00266172	0.0498451
NAIP	4671	NLR family, apoptosis inhibitory protein	6.2027	5.30146	1.86766	0.000619786	0.0198702
KHSRP	8570	KH-type splicing regulatory protein	11.3654	10.4641	1.86764	0.000973257	0.026524
RFESD	317671	Rieske (Fe-S) domain containing	3.84949	2.94893	1.86678	0.293725	0.634851
KIAA0930	23313	KIAA0930	9.92542	9.02489	1.86675	0.000638503	0.0202284
NDRG3	57446	NDRG family member 3	13.3785	12.4792	1.86519	0.000566793	0.018645
ITGB8	3696	integrin beta 8	8.74264	7.84449	1.86367	0.00524573	0.0743625
STXBP1	6812	syntaxin binding protein 1	11.3672	10.4702	1.86217	0.000718996	0.0218608
SOX13	9580	SRY box 13	11.0831	10.1866	1.86155	0.00198916	0.0411017
GABRA3	2556	gamma-aminobutyric acid (GABA) A receptor, alpha 3	6.23298	5.33653	1.86148	0.00102148	0.027198
RARG	5916	retinoic acid receptor, gamma	9.01914	8.12354	1.8604	0.00758952	0.0921744
ETV1	2115	ets variant 1	8.51577	7.62069	1.8597	0.00587209	0.0801175
SLC25A1	6576	solute carrier family 25 (mitochondrial carrier; citrate transporter), member 1	10.0078	9.11299	1.85942	0.000612918	0.0197682
P3H2	55214	prolyl 3-hydroxylase 2	5.76012	4.86574	1.85881	0.000888187	0.0250986
NCLN	56926	nicalin	8.72107	7.82787	1.8573	0.0251332	0.184015
SLC25A23	79085	solute carrier family 25 (mitochondrial carrier; phosphate carrier), member 23	7.82787	6.9361	1.85546	0.000266674	0.0114164
SPRY2	10253	sprouty RTK signaling antagonist 2	7.98215	7.09041	1.85541	0.0976335	0.386141
C20orf196	149840	chromosome 20 open reading frame 196	6.26854	5.37722	1.85488	0.0888942	0.36729
DAZ4	57135	deleted in azoospermia 4	3.51162	2.62031	1.85486	0.0453512	0.256986
MYRF	745	myelin regulatory factor	10.3612	9.47049	1.8541	0.0222956	0.170717
PRKY	5616	protein kinase, Y-linked, pseudogene	6.52413	5.63396	1.8534	0.00501016	0.0724598
LRP12	29967	LDL receptor related protein 12	5.10085	4.2112	1.85272	0.0325408	0.213828
SLC41A1	254428	solute carrier family 41 (magnesium transporter), member 1	10.0661	9.17742	1.85143	0.0115769	0.118519
GTF3C1	2975	general transcription factor IIIC subunit 1	7.80834	6.91985	1.85124	0.00189158	0.0399088
ZDHHC7	55625	zinc finger, DHHC-type containing 7	11.1973	10.3095	1.85034	0.00127107	0.0311563
CRABP2	1382	cellular retinoic acid binding protein 2	13.584	12.6966	1.84976	0.00781797	0.0932028
USP22	23326	ubiquitin specific peptidase 22	11.6809	10.7936	1.84965	0.000988644	0.0268411
TK2	7084	thymidine kinase 2, mitochondrial	5.51882	4.63234	1.84866	0.107303	0.405252
SEMA6C	10500	sema domain, transmembrane domain (TM), and cytoplasmic domain, (semaphorin) 6C	4.95055	4.06414	1.84858	0.0952426	0.380639
ANP32D	23519	acidic nuclear phosphoprotein 32 family member D	6.46855	5.58216	1.84854	0.256935	0.595498
ATF6B	1388	activating transcription factor 6 beta	12.9715	12.0853	1.84825	0.000734982	0.0220374
ABL1	25	ABL proto-oncogene 1, non-receptor tyrosine kinase	7.80646	6.92118	1.84712	0.00281057	0.0513468
MICAL1	64780	microtubule associated monooxygenase, calponin and LIM domain containing 1	6.99674	6.11157	1.84698	0.0381099	0.233872
CROT	54677	carnitine O-octanoyltransferase	8.1646	7.27987	1.84641	0.00341057	0.0583332
ACTB	60	actin, beta	11.2124	10.3282	1.84579	0.00105016	0.0276147
ZNF708	7562	zinc finger protein 708	8.1695	7.28538	1.84564	0.0430062	0.249246
CD44		Memczak2013 ALT_ACCEPTOR, ALT_DONOR, coding, INTERNAL, intronic best transcript NM_001202557	4.05051	3.16641	1.84561	0.0104112	0.11135
BMPR2	659	bone morphogenetic protein receptor type II	9.08151	8.19791	1.84498	0.00645887	0.0840084
MARCH5	54708	membrane associated ring finger 5	10.6294	9.74582	1.84496	0.000492429	0.0170074
PKMYT1	9088	protein kinase, membrane associated tyrosine/threonine 1	4.71995	3.83663	1.8446	0.0314371	0.21016
LRP5L	91355	LDL receptor related protein 5 like	6.56654	5.68332	1.84448	0.319353	0.657088
VPS51	738	vacuolar protein sorting 51 homolog (S. cerevisiae)	8.2023	7.3191	1.84446	0.00165084	0.0368443
CSNK2A2	1459	casein kinase 2, alpha prime polypeptide	12.4217	11.5391	1.84369	0.00079285	0.0231676
PROSER2	254427	proline and serine rich 2	8.79658	7.91451	1.84301	0.00602705	0.0814721
CDC34	997	cell division cycle 34	4.75631	3.87453	1.84264	0.027643	0.194517
TGOLN2		Memczak2013 ANTISENSE, CDS, coding, INTERNAL best transcript NM_001206844	7.80898	6.92758	1.84216	0.0222663	0.170717
MAML3	55534	mastermind-like transcriptional coactivator 3	8.02316	7.14192	1.84196	0.0187473	0.155488
GJB1	2705	gap junction protein beta 1	11.9625	11.0822	1.84064	0.000896801	0.0252754
SRR	63826	serine racemase	7.70545	6.82547	1.84036	0.00617659	0.0823853
ZNF780A	284323	zinc finger protein 780A	10.2643	9.38472	1.83978	0.00457995	0.0687409
PLEKHB1	58473	pleckstrin homology domain containing, family B (evectins) member 1	13.4669	12.5876	1.83939	0.000555772	0.018437
PYCR1	5831	pyrroline-5-carboxylate reductase 1	10.1723	9.2933	1.83906	0.000730282	0.0219679
TMEM139	135932	transmembrane protein 139	9.575	8.69625	1.83879	0.0115535	0.118337
TCIRG1	10312	T-cell, immune regulator 1, ATPase, H+ transporting, lysosomal V0 subunit A3	10.6656	9.78707	1.83848	0.000272536	0.0115749
CAPN1	823	calpain 1, (mu/I) large subunit	10.951	10.0736	1.83702	0.000727075	0.0219387
FERMT1	55612	fermitin family member 1	14.9334	14.0576	1.83495	0.00227552	0.0449819
KIR3DX1	90011	killer cell immunoglobulin-like receptor, three domains, X1	4.44779	3.57304	1.83368	0.114485	0.418363
RCN1	5954	reticulocalbin 1, EF-hand calcium binding domain	13.5925	12.718	1.83336	0.00112215	0.0287893
IDO1	3620	indoleamine 2,3-dioxygenase 1	4.86829	3.99388	1.83325	0.0397746	0.238692
SEMA4G	57715	sema domain, immunoglobulin domain (Ig), transmembrane domain (TM) and short cytoplasmic domain, (semaphorin) 4G	9.97514	9.10138	1.83244	0.0039093	0.0629479
UROS	7390	uroporphyrinogen III synthase	10.4518	9.57852	1.83178	0.00568324	0.0782579
SLC35E2B	728661	solute carrier family 35, member E2B	11.2995	10.4263	1.83175	0.000338527	0.0132013
CIZ1	25792	CDKN1A interacting zinc finger protein 1	11.878	11.0052	1.83126	0.00465491	0.0694288
DDAH1	23576	dimethylarginine dimethylaminohydrolase 1	12.9139	12.0413	1.83098	0.000787422	0.0231676
RCAN3	11123	RCAN family member 3	7.15158	6.27956	1.83022	0.0112776	0.116851
SLC19A2	10560	solute carrier family 19 (thiamine transporter), member 2	10.1903	9.31835	1.83014	0.0260928	0.188051
ATP13A1	57130	ATPase type 13A1	8.68506	7.81311	1.83014	0.011138	0.11574
SDHAF4	135154	succinate dehydrogenase complex assembly factor 4	7.32158	6.44968	1.83007	0.0227137	0.172815
PARVB	29780	parvin, beta	5.08136	4.20962	1.82987	0.0553055	0.287144
TLN1	7094	talin 1	7.17014	6.2995	1.82848	0.0610733	0.30274
MAN1B1	11253	mannosidase, alpha, class 1B, member 1	7.15256	6.28238	1.8279	0.0061545	0.082244
ANP32B	10541	acidic nuclear phosphoprotein 32 family member B	14.7514	13.8821	1.82666	0.00280629	0.0513468
FAM84B	157638	family with sequence similarity 84, member B	11.9722	11.1033	1.82625	0.00105061	0.0276147
BMPR1B	658	bone morphogenetic protein receptor type IB	5.17655	4.30823	1.82553	0.632092	0.859137
ZNF91	7644	zinc finger protein 91	3.76461	2.89779	1.82364	0.017832	0.151951
FPGS	2356	folylpolyglutamate synthase	10.2331	9.36649	1.8234	0.00102126	0.027198
PIK3CB		Salzman2013 ANNOTATED, CDS, coding, INTERNAL, OVCODE, OVEXON best transcript NM_006219	9.67316	8.80715	1.82262	0.000435842	0.0156845
RFPL3S	10737	RFPL3 antisense	5.44897	4.58302	1.82253	0.543986	0.813994
PPP2R4	5524	protein phosphatase 2A activator, regulatory subunit 4	10.1598	9.29412	1.82215	0.000832019	0.0238891
PRKAR1A	5573	protein kinase, cAMP-dependent, regulatory, type I, alpha	10.4127	9.5472	1.82202	0.0176269	0.150922
COLCA1	399948	colorectal cancer associated 1	7.37385	6.5091	1.82103	0.0130585	0.127251
USP34		Memczak2013 ANTISENSE, CDS, coding, INTERNAL best transcript NM_014709	8.7801	7.9158	1.82047	0.42511	0.737504
LPAR6	10161	lysophosphatidic acid receptor 6	8.76847	7.90494	1.81948	0.000321682	0.0127767
PER3	8863	period circadian clock 3	8.04584	7.18249	1.81926	0.00446969	0.0675587
EFNA2	1943	ephrin-A2	7.09729	6.23414	1.81901	0.0155287	0.141062
ENTPD1	953	ectonucleoside triphosphate diphosphohydrolase 1	6.59467	5.73183	1.8186	0.0110374	0.115199
HERC2	8924	HECT and RLD domain containing E3 ubiquitin protein ligase 2	7.66916	6.80737	1.8173	0.00246475	0.0474541
IDUA	3425	iduronidase, alpha-L-	7.79962	6.93826	1.81675	0.000813267	0.0235715
PATZ1	23598	POZ (BTB) and AT hook containing zinc finger 1	8.62384	7.76367	1.81526	0.000442758	0.0158096
DHTKD1	55526	dehydrogenase E1 and transketolase domain containing 1	10.0517	9.19173	1.81495	0.0138182	0.131845
CAT	847	catalase	10.266	9.40747	1.81313	0.0032345	0.0562214
INTS3	65123	integrator complex subunit 3	11.0186	10.1602	1.81305	0.000999892	0.0269231
RNASE12	493901	ribonuclease, RNase A family, 12 (non-active)	3.68387	2.82568	1.81276	0.0206353	0.162955
SUPT3H	8464	SPT3 homolog, SAGA and STAGA complex component	7.12333	6.26578	1.81195	0.00892677	0.100716
NUDT3	11165	nudix hydrolase 3	10.6682	9.81168	1.81063	0.000958789	0.0262322
DSTYK	25778	dual serine/threonine and tyrosine protein kinase	4.32547	3.46912	1.81045	0.0826569	0.354069
CAMK2B		Transcript Identified by AceView, Entrez Gene ID(s) 816	5.77132	4.91503	1.81037	0.146232	0.4641
TTL	150465	tubulin tyrosine ligase	7.87669	7.02085	1.80981	0.0606681	0.301555
NUDT19	390916	nudix hydrolase 19	8.41403	7.5582	1.8098	0.000802047	0.0233093
TMPRSS2	7113	transmembrane protease, serine 2	7.32916	6.4735	1.80959	0.000995117	0.0269231
ZDHHC14	79683	zinc finger, DHHC-type containing 14	4.69145	3.83613	1.80916	0.00583147	0.0796645
LRP10	26020	LDL receptor related protein 10	11.2662	10.4114	1.80863	0.00669421	0.086026
RFX7	64864	regulatory factor X, 7	9.91877	9.0645	1.80784	0.00441683	0.0671116
PIP5K1C	23396	phosphatidylinositol-4-phosphate 5-kinase, type I, gamma	8.58465	7.73039	1.80783	0.0270134	0.192167
RHBDL1	9028	rhomboid, veinlet-like 1 (Drosophila)	5.53307	4.67951	1.80695	0.0116555	0.118929
SHISA4	149345	shisa family member 4	5.21032	4.35685	1.80684	0.00101886	0.027198
MAPK8IP3	23162	mitogen-activated protein kinase 8 interacting protein 3	8.5249	7.67174	1.80646	0.00705798	0.088429
SEMA4D	10507	sema domain, immunoglobulin domain (Ig), transmembrane domain (TM) and short cytoplasmic domain, (semaphorin) 4D	8.45759	7.60474	1.80606	0.0047993	0.0706626
NUPR2	389493	nuclear protein 2, transcriptional regulator	4.45349	3.60086	1.80579	0.0286236	0.19853
CNIH3		Transcript Identified by AceView, Entrez Gene ID(s) 149111	4.06449	3.21194	1.80569	0.190048	0.522545
SREBF2	6721	sterol regulatory element binding transcription factor 2	11.5355	10.683	1.80564	0.000584109	0.0190106
NT5C	30833	5, 3-nucleotidase, cytosolic	8.34314	7.49068	1.80558	0.0689903	0.322516
ZNF546	339327	zinc finger protein 546	4.36365	3.51122	1.80554	0.00613586	0.0820461
USP17L1	401447	ubiquitin specific peptidase 17-like family member 1	4.14515	3.29352	1.80454	0.136816	0.450852
NOB1	28987	NIN1/RPN12 binding protein 1 homolog	13.6594	12.808	1.80425	0.00100903	0.0270529
SERPINA1	5265	serpin peptidase inhibitor, clade A (alpha-1 antiproteinase, antitrypsin), member 1	15.3219	14.471	1.80374	0.00738453	0.0908161
TSEN15	116461	TSEN15 tRNA splicing endonuclease subunit	7.6289	6.77801	1.80361	0.00206056	0.0421216
SLC7A2	6542	solute carrier family 7 (cationic amino acid transporter, y+ system), member 2	9.16883	8.31799	1.80354	0.00110897	0.0285537
TTC23	64927	tetratricopeptide repeat domain 23	8.19289	7.34252	1.80297	0.00455682	0.0684897
MLXIP	22877	MLX interacting protein	11.2834	10.4334	1.8024	0.00135496	0.0328004
ZMYM2	7750	zinc finger, MYM-type 2	11.2934	10.4437	1.80215	0.0219639	0.169553
CREBBP	1387	CREB binding protein	11.6027	10.7533	1.80169	0.00063577	0.0202067
RAB11B	9230	RAB11B, member RAS oncogene family	10.5113	9.66225	1.80124	0.00103506	0.0273904
PRDX5	25824	peroxiredoxin 5	11.0521	10.2041	1.80004	0.00432931	0.0665151
TSTD3	100130890	thiosulfate sulfurtransferase (rhodanese)-like domain containing 3	6.38695	5.53991	1.79881	0.0339489	0.218857
WASF2		Memczak2013 ANTISENSE, coding, INTERNAL, intronic best transcript NM_006990	3.9311	3.08407	1.79879	0.93593	0.981417
PLXNB2	23654	plexin B2	10.2812	9.43448	1.79838	0.00236454	0.0461462
AHCY	191	adenosylhomocysteinase	11.4301	10.5848	1.79661	0.00188865	0.0399088
SOX4	6659	SRY box 4	11.5938	10.7488	1.79627	0.000792248	0.0231676
TSPYL4	23270	TSPY-like 4	6.79846	5.95351	1.7962	0.0061734	0.0823853
MYPN	84665	myopalladin	4.50843	3.66453	1.79489	0.143521	0.459783
MPO		Memczak2013 ANTISENSE, CDS, coding, INTERNAL best transcript NM_000250	3.47679	2.63325	1.79445	0.197303	0.530227
MAGEB6	158809	MAGE family member B6	3.35826	2.515	1.7941	0.262028	0.601252
DLGAP4	22839	discs, large (Drosophila) homolog-associated protein 4	8.11835	7.27561	1.79346	0.00244419	0.0472923
MYH14	79784	myosin, heavy chain 14, non-muscle	8.4074	7.56481	1.79326	0.351071	0.682837
BORCS7	119032	BLOC-1 related complex subunit 7	8.27121	7.42892	1.79289	0.0656876	0.314199
TFCP2L1	29842	transcription factor CP2-like 1	4.85693	4.01503	1.7924	0.04041	0.240224
SUGP2	10147	SURP and G-patch domain containing 2	6.84308	6.00124	1.79233	0.00116886	0.0295983
ZNF311	282890	zinc finger protein 311	5.87875	5.03707	1.79214	0.0114673	0.118053
RDX	5962	radixin	9.18388	8.34268	1.79154	0.0018026	0.0388669
ETV5	2119	ets variant 5	9.89186	9.05096	1.79118	0.00437274	0.066752
NFYB	4801	nuclear transcription factor Y subunit beta	8.46661	7.62619	1.79058	0.0532475	0.280788
SEPT9	10801	septin 9	9.22926	8.38955	1.78969	0.00126798	0.0311519
TNFAIP2	7127	tumor necrosis factor, alpha-induced protein 2	10.2113	9.37161	1.78967	0.0142003	0.133817
ZNF197	10168	zinc finger protein 197	6.21082	5.37257	1.78789	0.00283519	0.0516207
B4GALT6	9331	UDP-Gal:betaGlcNAc beta 1,4- galactosyltransferase, polypeptide 6	5.9708	5.13286	1.78749	0.00135988	0.0328335
RCC2	55920	regulator of chromosome condensation 2	13.269	12.4315	1.78703	0.00147482	0.0347603
PPDPF	79144	pancreatic progenitor cell differentiation and proliferation factor	9.75583	8.91827	1.78703	0.012636	0.124666
SGK1	6446	serum/glucocorticoid regulated kinase 1	10.1394	9.30297	1.78559	0.00300393	0.0538892
KANK1	23189	KN motif and ankyrin repeat domains 1	7.30324	6.4671	1.78527	0.00328694	0.0566707
RHOBTB1	9886	Rho-related BTB domain containing 1	7.22378	6.38769	1.78521	0.0179323	0.152346
TRIM66	9866	tripartite motif containing 66	6.92786	6.09179	1.78519	0.0121527	0.121603
SYT7	9066	synaptotagmin VII	8.49954	7.66355	1.78508	0.0170657	0.148189
MTHFD2L	441024	methylenetetrahydrofolate dehydrogenase (NADP+ dependent) 2-like	6.2578	5.42203	1.78481	0.00423107	0.0654276
TANK	10010	TRAF family member-associated NFKB activator	12.6194	11.7837	1.78475	0.00563668	0.0777963
COX10	1352	COX10 heme A:farnesyltransferase cytochrome c oxidase assembly factor	7.61129	6.77591	1.78433	0.0148268	0.137602
CSK	1445	c-src tyrosine kinase	8.00546	7.17071	1.78354	0.00517818	0.0737461
GLTSCR2	29997	glioma tumor suppressor candidate region gene 2	9.98951	9.15522	1.78298	0.00190651	0.0400718
RBFOX2	23543	RNA binding protein, fox-1 homolog (C. elegans) 2	9.14604	8.31176	1.78297	0.00758213	0.0921667
KLK1	3816	kallikrein 1	5.1682	4.33411	1.78273	0.444643	0.75294
LOC441178	441178	uncharacterized LOC441178	5.63133	4.79783	1.78201	0.0102017	0.110016
UPK3B	80761	uroplakin 3B	7.88678	7.05336	1.7819	0.0119037	0.120111
REPS2	9185	RALBP1 associated Eps domain containing 2	8.2799	7.44669	1.78164	0.0105542	0.11217
CCKBR	887	cholecystokinin B receptor	7.04367	6.21053	1.78156	0.108879	0.408616
METTL7A	25840	methyltransferase like 7A	6.64734	5.81466	1.781	0.00311149	0.0550393
CD72	971	CD72 molecule	6.30566	5.47516	1.7783	0.406054	0.724787
IQGAP2	10788	IQ motif containing GTPase activating protein 2	7.7576	6.92712	1.77828	0.00621483	0.0825823
LRRC8D	55144	leucine rich repeat containing 8 family, member D	10.9309	10.1006	1.77809	0.00277913	0.0510333
PLCG1	5335	phospholipase C, gamma 1	7.10126	6.27146	1.77745	0.00509737	0.0730805
EEFSEC	60678	eukaryotic elongation factor, selenocysteine-tRNA-specific	8.80521	7.97541	1.77744	0.0269359	0.191743
NF1	4763	neurofibromin 1	12.9697	12.1399	1.77741	0.0085294	0.0983019
MYH9	4627	myosin, heavy chain 9, non-muscle	12.1054	11.276	1.77698	0.000811199	0.0235434
PRM2	5620	protamine 2	6.94151	6.11242	1.77656	0.0373137	0.231235
RRS1	23212	ribosome biogenesis regulator homolog	8.53915	7.71007	1.77654	0.00196163	0.0408079
NFIX	4784	nuclear factor I/X (CCAAT-binding transcription factor)	11.2203	10.3918	1.77584	0.000709674	0.021838
MAML2	84441	mastermind-like transcriptional coactivator 2	8.91209	8.08365	1.77577	0.0018747	0.0397318
TFAP4	7023	transcription factor AP-4 (activating enhancer binding protein 4)	9.4889	8.66141	1.7746	0.00674348	0.0863939
LRIG3	121227	leucine-rich repeats and immunoglobulin-like domains 3	8.07166	7.24436	1.77436	0.0074736	0.0912835
GIT2	9815	G protein-coupled receptor kinase interacting ArfGAP 2	9.08012	8.25361	1.77339	0.0948966	0.379941
TRAPPC5	126003	trafficking protein particle complex 5	7.95952	7.13351	1.77277	0.01406	0.132963
MYO1C	4641	myosin IC	12.0841	11.2592	1.77141	0.00636503	0.0833947
IL2RA	3559	interleukin 2 receptor, alpha	4.01633	3.19207	1.77063	0.0185624	0.154973
RASSF3	283349	Ras association (RalGDS/AF-6) domain family member 3	10.0147	9.19079	1.77023	0.00406614	0.0641726
DEXI	28955	Dexi homolog (mouse)	8.0537	7.23041	1.76943	0.00216748	0.0436508
PPP1R13L	10848	protein phosphatase 1, regulatory subunit 13 like	6.85761	6.03489	1.76874	0.000616936	0.0198084
MAP2K3	5606	mitogen-activated protein kinase kinase 3	7.37282	6.5504	1.76837	0.00114849	0.0292551
RPS4Y2	140032	ribosomal protein S4, Y-linked 2	3.85196	3.03076	1.76688	0.592912	0.84089
MACROD2	140733	MACRO domain containing 2	3.78583	2.96523	1.76615	0.0179422	0.152346
OR6C65	403282	olfactory receptor, family 6, subfamily C, member 65	4.29806	3.47798	1.7655	0.0156092	0.141201
PTPN2	5771	protein tyrosine phosphatase, non-receptor type 2	11.536	10.7162	1.76519	0.002072	0.0421633
FSD1	79187	fibronectin type III and SPRY domain containing 1	3.86005	3.04228	1.76268	0.0204351	0.162266
PMVK	10654	phosphomevalonate kinase	7.86907	7.05142	1.76254	0.00854014	0.0983124
INF2	64423	inverted formin, FH2 and WH2 domain containing	6.49186	5.67439	1.76232	0.00169031	0.0373516
S100P	6286	S100 calcium binding protein P	12.2973	11.4801	1.76202	0.00709726	0.0886042
ERN2	10595	endoplasmic reticulum to nucleus signaling 2	7.59665	6.77975	1.76161	0.00177371	0.0385436
EVC2	132884	Ellis van Creveld syndrome 2	3.53341	2.71679	1.76128	0.0577147	0.293472
NKIRAS2		Memczak2013 ANTISENSE, coding, INTERNAL, UTR3 best transcript NM_001001349	8.03346	7.21689	1.76122	0.0551637	0.286791
BCL9L	283149	B-cell CLL/lymphoma 9-like	10.3037	9.48877	1.75924	0.00161442	0.0364494
CLTA	1211	clathrin, light chain A	10.5121	9.69726	1.75915	0.00706988	0.0884683
HEXIM1	10614	hexamethylene bis-acetamide inducible 1	9.51512	8.70024	1.75914	0.0159122	0.142737
STX10	8677	syntaxin 10	7.29086	6.47727	1.75758	0.0303045	0.205557
PABPC4	8761	poly(A) binding protein, cytoplasmic 4 (inducible form)	11.5553	10.7418	1.75748	0.00181543	0.0390165
ANKS6	203286	ankyrin repeat and sterile alpha motif domain containing 6	8.0542	7.24143	1.75658	0.00621491	0.0825823
NTMT1	28989	N-terminal Xaa-Pro-Lys N-methyltransferase 1	8.16079	7.34825	1.75631	0.00854412	0.0983124
CEP295NL	100653515	CEP295 N-terminal like	9.15619	8.34375	1.75618	0.00224888	0.0447025
IRF2BP1	26145	interferon regulatory factor 2 binding protein 1	6.54294	5.73153	1.75492	0.158113	0.481172
ALDH7A1	501	aldehyde dehydrogenase 7 family, member A1	8.98841	8.17847	1.75314	0.0115891	0.118532
SIX4	51804	SIX homeobox 4	6.63638	5.82662	1.75292	0.00548008	0.0765213
DEGS1	8560	delta(4)-desaturase, sphingolipid 1	6.83187	6.02287	1.75199	0.0411373	0.242794
ZNF428	126299	zinc finger protein 428	5.97551	5.16659	1.75189	0.0168515	0.147222
THSD7A	221981	thrombospondin type 1 domain containing 7A	4.865	4.05631	1.75162	0.307371	0.647099
PRRC2B	84726	proline-rich coiled-coil 2B	9.27568	8.46733	1.7512	0.00123586	0.030679
MMD	23531	monocyte to macrophage differentiation-associated	8.10678	7.29941	1.75002	0.00123956	0.0307355
HIBADH		Salzman2013 ALT_ACCEPTOR, ALT_DONOR, coding, INTERNAL, intronic best transcript NM_152740	4.18676	3.37995	1.74934	0.00220659	0.0441482
RBM26		Transcript Identified by AceView, Entrez Gene ID(s) 64062	6.76182	5.95544	1.74881	0.165984	0.492747
MAPRE2	10982	microtubule-associated protein, RP/EB family, member 2	8.59248	7.78669	1.74811	0.00139596	0.0334158
YLPM1	56252	YLP motif containing 1	9.47116	8.66626	1.74702	0.00715592	0.089129
NELFB	25920	negative elongation factor complex member B	8.71786	7.91358	1.74627	0.00507206	0.0728346
SERPINA13P	388007	serpin peptidase inhibitor, clade A (alpha-1 antiproteinase, antitrypsin), member 13, pseudogene	3.77251	2.96913	1.74519	0.212411	0.548256
SOGA3	387104	SOGA family member 3	3.78185	2.97881	1.74477	0.145359	0.462447
LHPP	64077	phospholysine phosphohistidine inorganic pyrophosphate phosphatase	5.36128	4.55836	1.74463	0.0007212	0.0218608
RNFT2	84900	ring finger protein, transmembrane 2	6.52558	5.72267	1.74462	0.000890723	0.0251371
JOSD2	126119	Josephin domain containing 2	7.809	7.00614	1.74456	0.00922022	0.103051
ACVR1B	91	activin A receptor type IB	8.16089	7.35849	1.74399	0.0137412	0.131455
PYGO2	90780	pygopus family PHD finger 2	8.34376	7.54138	1.74399	0.0170291	0.148147
DEFB130	245940	defensin, beta 130	4.23763	3.43587	1.74322	0.00800814	0.0944247
DEFB130	245940	defensin, beta 130	4.23763	3.43587	1.74322	0.00800814	0.0944247
SKAP2	8935	src kinase associated phosphoprotein 2	10.8245	10.0229	1.74302	0.0139988	0.132676
PSPH	5723	phosphoserine phosphatase	8.93962	8.13828	1.74272	0.00101158	0.0270529
SDHAF3	57001	succinate dehydrogenase complex assembly factor 3	8.46203	7.66117	1.74214	0.0101624	0.109849
BCL2L14	79370	BCL2-like 14 (apoptosis facilitator)	7.28172	6.48096	1.74201	0.00772361	0.092807
BTNL10	100129094	butyrophilin-like 10	5.59696	4.79697	1.74109	0.0956422	0.381076
EFCAB14	9813	EF-hand calcium binding domain 14	11.5202	10.7204	1.7408	0.00399771	0.0635133
PCGF3	10336	polycomb group ring finger 3	9.19889	8.39942	1.74046	0.00547307	0.0764732
BPY2B	442867	basic charge, Y-linked, 2B	3.96541	3.16606	1.74032	0.166502	0.493342
SLC16A7	9194	solute carrier family 16 (monocarboxylate transporter), member 7	7.22167	6.42284	1.73968	0.0026633	0.0498451
BRSK2	9024	BR serine/threonine kinase 2	5.05899	4.26021	1.73962	0.0515335	0.275634
SLC35E2	9906	solute carrier family 35, member E2	11.5562	10.7578	1.73913	0.000711698	0.0218608
HSF2BP	11077	heat shock transcription factor 2 binding protein	4.60273	3.80469	1.73873	0.0135372	0.130258
LARP1	23367	La ribonucleoprotein domain family, member 1	13.1991	12.4013	1.73844	0.00116158	0.0294836
ZNF317	57693	zinc finger protein 317	8.93821	8.14094	1.73781	0.0733957	0.332315
ZNF257	113835	zinc finger protein 257	6.58916	5.79196	1.73773	0.0352336	0.224174
ATP13A3	79572	ATPase type 13A3	13.315	12.5188	1.73657	0.00487395	0.0713499
NME8	51314	NME/NM23 family member 8	3.41388	2.61771	1.73649	0.224873	0.56391
NCOA6	23054	nuclear receptor coactivator 6	11.162	10.366	1.73629	0.0111137	0.1156
SPTAN1	6709	spectrin, alpha, non-erythrocytic 1	9.61246	8.8166	1.73612	0.0240995	0.179987
PEX6	5190	peroxisomal biogenesis factor 6	5.20079	4.40516	1.73584	0.0424533	0.247362
CAMLG	819	calcium modulating ligand	9.37801	8.58291	1.73521	0.023585	0.177614
FAM83H	286077	family with sequence similarity 83, member H	10.3112	9.51657	1.73465	0.00896255	0.101014
ATP11B	23200	ATPase, class VI, type 11B	9.79123	8.99674	1.73446	0.0354367	0.224782
LPGAT1	9926	lysophosphatidylglycerol acyltransferase 1	7.93511	7.14084	1.7342	0.344557	0.678299
AKR7A2	8574	aldo-keto reductase family 7, member A2	9.43916	8.64573	1.73319	0.434169	0.744309
SNX8	29886	sorting nexin 8	9.63922	8.84584	1.73313	0.00382203	0.0621964
GLCCI1	113263	glucocorticoid induced 1	7.07011	6.27673	1.73312	0.00370195	0.0612928
FAAP100	80233	Fanconi anemia core complex associated protein 100	6.34042	5.54717	1.73298	0.00206892	0.0421408
SULT2B1	6820	sulfotransferase family 2B member 1	7.9107	7.11761	1.73278	0.0485587	0.266686
RCC2	55920	regulator of chromosome condensation 2	12.256	11.4637	1.73172	0.000854352	0.0243996
MFSD3	113655	major facilitator superfamily domain containing 3	7.06861	6.27656	1.73153	0.326118	0.663371
CHN2	1124	chimerin 2	5.39046	4.59845	1.73149	0.00536817	0.0755224
MAP2K2	5605	mitogen-activated protein kinase kinase 2	11.3013	10.5095	1.7312	0.00162148	0.0364494
TRIO	7204	trio Rho guanine nucleotide exchange factor	9.59955	8.80795	1.731	0.00151353	0.0352213
INHA	3623	inhibin alpha	4.54986	3.75828	1.73097	0.0239081	0.178919
HSF1	3297	heat shock transcription factor 1	9.52159	8.7305	1.73039	0.00199782	0.0412012
FCER1A	2205	Fc fragment of IgE, high affinity I, receptor for; alpha polypeptide	3.82727	3.03662	1.72985	0.00109659	0.0283369
ZNF780B	163131	zinc finger protein 780B	8.97975	8.18978	1.72905	0.0113379	0.11725
ZNF780B	163131	zinc finger protein 780B	8.97975	8.18978	1.72905	0.0113379	0.11725
UPF3B	65109	UPF3 regulator of nonsense transcripts homolog B (yeast)	10.0886	9.29864	1.72898	0.0312215	0.209458
AGO1	26523	argonaute RISC catalytic component 1	8.87484	8.08499	1.72889	0.00182655	0.0390587
BPTF	2186	bromodomain PHD finger transcription factor	12.0274	11.238	1.72837	0.00168086	0.03732
EPHB2	2048	EPH receptor B2	4.67257	3.88336	1.72812	0.490902	0.780554
LRRC4B	94030	leucine rich repeat containing 4B	3.77409	2.98494	1.72806	0.0196505	0.158863
GIT1	28964	G protein-coupled receptor kinase interacting ArfGAP 1	10.1171	9.32845	1.72747	0.00349599	0.0593506
GGT6	124975	gamma-glutamyltransferase 6	4.49045	3.70255	1.72656	0.15024	0.470074
PDE1A		Transcript Identified by AceView, Entrez Gene ID(s) 5136	3.30654	2.51877	1.7264	0.0754363	0.33792
PLBD2	196463	phospholipase B domain containing 2	8.95332	8.16589	1.726	0.00161674	0.0364494
VWA2	340706	von Willebrand factor A domain containing 2	6.95071	6.16513	1.72378	0.00251947	0.0480335
SOSTDC1	25928	sclerostin domain containing 1	7.65964	6.87411	1.72372	0.0659902	0.315084
NR4A1	3164	nuclear receptor subfamily 4, group A, member 1	7.90161	7.11618	1.72361	0.0248532	0.183189
DRG2	1819	developmentally regulated GTP binding protein 2	7.90932	7.12425	1.72317	0.00716799	0.0891758
NBPF4	148545	neuroblastoma breakpoint family, member 4	4.38666	3.60234	1.72228	0.072946	0.331682
CAT		Memczak2013 ANTISENSE, CDS, coding, INTERNAL, UTR3 best transcript NM_001752	4.63205	3.84781	1.72218	0.622882	0.854759
METTL17	64745	methyltransferase like 17	6.94648	6.16237	1.72202	0.00612492	0.0820092
KCNA1	3736	potassium channel, voltage gated shaker related subfamily A, member 1	3.75585	2.9722	1.72148	0.0573995	0.292285
ATP9A	10079	ATPase, class II, type 9A	12.6849	11.9016	1.72111	0.000533338	0.0179908
SCAPER		Transcript Identified by AceView, Entrez Gene ID(s) 49855	4.61747	3.83424	1.72098	0.0191554	0.157043
MLXIP	22877	MLX interacting protein	11.871	11.088	1.72069	0.00389863	0.0629479
OTUD7B	56957	OTU deubiquitinase 7B	6.61082	5.82803	1.72045	0.00127103	0.0311563
KIF12	113220	kinesin family member 12	5.49068	4.70799	1.72034	0.0011381	0.0290302
ZNF274		Memczak2013 ANTISENSE, CDS, coding, INTERNAL best transcript NM_133502	4.82001	4.03754	1.72006	0.00768287	0.0926053
DMAP1	55929	DNA methyltransferase 1 associated protein 1	7.03176	6.24934	1.72002	0.00916841	0.102794
PVRL1	5818	poliovirus receptor-related 1 (herpesvirus entry mediator C)	10.1715	9.38993	1.71902	0.00231473	0.0454636
BCL2L15	440603	BCL2-like 15	6.34061	5.55928	1.71871	0.445017	0.753095
GDPD1	284161	glycerophosphodiester phosphodiesterase domain containing 1	5.65053	4.86937	1.71851	0.0184734	0.154725
TENM2	57451	teneurin transmembrane protein 2	4.93216	4.15159	1.71781	0.131129	0.443485
CGNL1	84952	cingulin-like 1	6.61989	5.83938	1.71774	0.00679393	0.0869428
KIF1B	23095	kinesin family member 1B	8.53206	7.75193	1.7173	0.00852515	0.0983019
EIF4EBP1	1978	eukaryotic translation initiation factor 4E binding protein 1	10.1004	9.32027	1.7173	0.00311751	0.0550777
NYNRIN	57523	NYN domain and retroviral integrase containing	8.15276	7.37267	1.71724	0.00226739	0.0449039
TCEB3CL	728929	transcription elongation factor B polypeptide 3C-like	5.9459	5.1662	1.71677	0.801406	0.932475
MAGI1	9223	membrane associated guanylate kinase, WW and PDZ domain containing 1	6.3766	5.59729	1.71631	0.0329304	0.215596
SMARCB1	6598	SWI/SNF related, matrix associated, actin dependent regulator of chromatin, subfamily b, member 1	9.9574	9.17832	1.71604	0.01081	0.113765
NPDC1	56654	neural proliferation, differentiation and control, 1	8.53238	7.75359	1.71569	0.00300501	0.0538892
MSH3	4437	mutS homolog 3	9.5998	8.82117	1.7155	0.00471563	0.0699452
DTX4	23220	deltex 4, E3 ubiquitin ligase	7.46832	6.68989	1.71526	0.00362243	0.0603861
CHSY1	22856	chondroitin sulfate synthase 1	9.15913	8.38078	1.71517	0.00384777	0.0624418
GOLT1A	127845	golgi transport 1A	7.1512	6.37302	1.71497	0.188785	0.521541
KRT73	319101	keratin 73, type II	4.18079	3.4029	1.71463	0.16265	0.487224
GIPC1	10755	GIPC PDZ domain containing family, member 1	8.71797	7.94059	1.71402	0.00569254	0.0783033
EYS	346007	eyes shut homolog (Drosophila)	4.93078	4.15361	1.71377	0.00604856	0.0814885
NTN4	59277	netrin 4	10.752	9.97504	1.71348	0.0527307	0.27932
NLE1	54475	notchless homolog 1 (Drosophila)	8.91688	8.14038	1.71297	0.00437052	0.066752
WDR6	11180	WD repeat domain 6	7.08415	6.3077	1.71291	0.00375147	0.0615583
EPB41L2	2037	erythrocyte membrane protein band 4.1-like 2	8.03145	7.25502	1.71288	0.00668953	0.0860174
PRAME	23532	preferentially expressed antigen in melanoma	4.38177	3.60609	1.71199	0.283457	0.624957
LTBP3	4054	latent transforming growth factor beta binding protein 3	7.80373	7.02897	1.71091	0.0582638	0.295284
BRWD3	254065	bromodomain and WD repeat domain containing 3	9.18315	8.40863	1.71062	0.115309	0.41996
SH3BP4	23677	SH3-domain binding protein 4	12.4056	11.6321	1.70941	0.000934597	0.0258648
NNMT	4837	nicotinamide N-methyltransferase	4.30055	3.52712	1.70934	0.000764457	0.0227407
CAPSL	133690	calcyphosine-like	3.65507	2.88166	1.7093	0.0117018	0.119288
TMEM80	283232	transmembrane protein 80	10.7937	10.0204	1.70921	0.0179324	0.152346
SRD5A1	6715	steroid-5-alpha-reductase, alpha polypeptide 1 (3-oxo-5 alpha-steroid delta 4-dehydrogenase alpha 1)	9.34693	8.57372	1.70907	0.0022541	0.0447647
FAM234A	83986	family with sequence similarity 234, member A	10.4924	9.72004	1.70806	0.0037378	0.0614316
EHMT2	10919	euchromatic histone-lysine N-methyltransferase 2	8.79466	8.02383	1.70625	0.0103099	0.110563
PPA1	5464	pyrophosphatase (inorganic) 1	12.6448	11.8743	1.70585	0.0115339	0.118251
UQCRC1	7384	ubiquinol-cytochrome c reductase core protein I	11.2083	10.4383	1.70522	0.0940705	0.37847
MICAL2	9645	microtubule associated monooxygenase, calponin and LIM domain containing 2	11.3701	10.6001	1.70519	0.0120179	0.120684
CAMSAP3	57662	calmodulin regulated spectrin-associated protein family, member 3	6.40682	5.63739	1.7046	0.00345285	0.0587285
ELMSAN1	91748	ELM2 and Myb/SANT-like domain containing 1	7.05768	6.28834	1.7045	0.0291722	0.200798
IVD	3712	isovaleryl-CoA dehydrogenase	9.45998	8.69087	1.70422	0.00407475	0.0642612
BICC1	80114	BicC family RNA binding protein 1	3.0601	2.29117	1.70401	0.378824	0.705031
DPP7	29952	dipeptidyl-peptidase 7	8.30507	7.53738	1.70254	0.00197346	0.0410058
RIPK1	8737	receptor (TNFRSF)-interacting serine-threonine kinase 1	8.39908	7.6317	1.70217	0.0103042	0.110558
ALPK3	57538	alpha kinase 3	10.5093	9.74211	1.70191	0.000635893	0.0202067
SPNS2	124976	spinster homolog 2 (Drosophila)	6.37218	5.6055	1.70135	0.00791549	0.0940041
APOBEC3G	60489	apolipoprotein B mRNA editing enzyme, catalytic polypeptide-like 3G	3.5982	2.83165	1.70119	0.0287191	0.198811
HCFC1	3054	host cell factor C1	11.1094	10.3434	1.70052	0.00427652	0.0659402
CETN3	1070	centrin 3	7.58283	6.81692	1.70044	0.0245187	0.18195
SCPEP1	59342	serine carboxypeptidase 1	7.81871	7.05282	1.70042	0.00872941	0.0995688
PLCD3	113026	phospholipase C, delta 3	7.59975	6.8341	1.70014	0.000874234	0.0248352
POLD1	5424	polymerase (DNA directed), delta 1, catalytic subunit	5.38907	4.62358	1.69995	0.114091	0.417511
RAB11FIP1	80223	RAB11 family interacting protein 1 (class I)	7.55881	6.79366	1.69955	0.00105474	0.0276577
ZNF503-AS2	100131213	ZNF503 antisense RNA 2	4.3186	3.55363	1.69934	0.119549	0.425647
TRPS1		Transcript Identified by AceView, Entrez Gene ID(s) 7227	7.23116	6.4662	1.69932	0.0480006	0.265057
DNMT3A	1788	DNA (cytosine-5-)-methyltransferase 3 alpha	8.56622	7.80154	1.69899	0.00609628	0.0818742
UBE2H	7328	ubiquitin conjugating enzyme E2H	11.9212	11.1565	1.69892	0.00095116	0.0261544
NRARP	441478	NOTCH-regulated ankyrin repeat protein	7.18483	6.42049	1.6986	0.0214188	0.166961
EED	8726	embryonic ectoderm development	7.88236	7.11817	1.69841	0.0428346	0.248705
CHPT1	56994	choline phosphotransferase 1	8.82354	8.06046	1.6971	0.00200932	0.041333
NSMAF	8439	neutral sphingomyelinase activation associated factor	9.82839	9.066	1.6963	0.00263292	0.0494059
KLHDC7A	127707	kelch domain containing 7A	5.01097	4.24878	1.69607	0.0622611	0.305788
FNDC4	64838	fibronectin type III domain containing 4	5.97314	5.21133	1.69563	0.0670522	0.317217
ZNF524	147807	zinc finger protein 524	4.78418	4.02277	1.69515	0.00592938	0.0806937
PCDH1	5097	protocadherin 1	8.93715	8.17586	1.69502	0.138999	0.454133
ALDH1A1	216	aldehyde dehydrogenase 1 family, member A1	13.3446	12.5837	1.69456	0.00100045	0.0269231
MXD4	10608	MAX dimerization protein 4	8.55422	7.79333	1.69454	0.00192012	0.040263
ERGIC1	57222	endoplasmic reticulum-golgi intermediate compartment 1	15.1854	14.4247	1.69431	0.00215037	0.0434694
ACSL1	2180	acyl-CoA synthetase long-chain family member 1	9.58793	8.82835	1.693	0.0410663	0.242794
SETD1B	23067	SET domain containing 1B	8.12468	7.36544	1.6926	0.00702161	0.0882019
MC4R	4160	melanocortin 4 receptor	4.35354	3.59497	1.69182	0.243728	0.583845
GLT6D1	360203	glycosyltransferase 6 domain containing 1	5.46832	4.70987	1.69168	0.445306	0.753151
HES1	3280	hes family bHLH transcription factor 1	9.83373	9.0759	1.69095	0.00551412	0.0767966
TTC32	130502	tetratricopeptide repeat domain 32	7.33643	6.57959	1.68978	0.0703499	0.325402
ARHGEF11	9826	Rho guanine nucleotide exchange factor 11	4.40448	3.64828	1.68903	0.00413751	0.0646569
RRAGC	64121	Ras-related GTP binding C	11.1085	10.353	1.68819	0.0323813	0.213238
CNIH3	149111	cornichon family AMPA receptor auxiliary protein 3	4.12157	3.36741	1.68665	0.666982	0.875636
PCNXL3	399909	pecanex-like 3 (Drosophila)	9.38262	8.62856	1.68653	0.01975	0.159367
AKT2	208	v-akt murine thymoma viral oncogene homolog 2	11.3808	10.6268	1.68647	0.00256148	0.0485029
TMC8	147138	transmembrane channel like 8	6.50388	5.75009	1.68622	0.0250969	0.183918
R3HDM2	22864	R3H domain containing 2	10.1067	9.3533	1.68577	0.00168968	0.0373516
FAM63A	55793	family with sequence similarity 63, member A	6.46251	5.70964	1.68515	0.00595582	0.0810021
MTSS1L	92154	metastasis suppressor 1-like	8.89729	8.14445	1.6851	0.00727289	0.0899071
SNAP29	9342	synaptosome associated protein 29kDa	10.9339	10.1811	1.68506	0.00436256	0.06675
DAPL1	92196	death associated protein like 1	4.32677	3.57433	1.68464	0.123687	0.431362
ROCK1	6093	Rho-associated, coiled-coil containing protein kinase 1	8.44004	7.68855	1.68354	0.00279492	0.0511916
CLOCK	9575	clock circadian regulator	9.82528	9.07432	1.68292	0.131056	0.443485
SELL		Memczak2013 ALT_ACCEPTOR, ALT_DONOR, coding, INTERNAL, intronic best transcript NM_000655	4.06078	3.30997	1.68273	0.308719	0.648015
RNF122	79845	ring finger protein 122	7.04099	6.2903	1.6826	0.00642535	0.0837549
TINAGL1	64129	tubulointerstitial nephritis antigen-like 1	10.7958	10.0456	1.68204	0.00523259	0.0743236
TNFSF15	9966	tumor necrosis factor (ligand) superfamily, member 15	10.0118	9.26206	1.68151	0.00149846	0.0350355
ETV6	2120	ets variant 6	12.6803	11.9308	1.68122	0.0104993	0.111812
FAM26E	254228	family with sequence similarity 26, member E	4.76848	4.01931	1.68082	0.022147	0.170254
SURF1	6834	surfeit 1	6.78404	6.03499	1.68069	0.00397718	0.0634692
FAM173B		Transcript Identified by AceView, Entrez Gene ID(s) 134145	7.19363	6.44463	1.68063	0.00647079	0.0841124
CMIP	80790	c-Maf inducing protein	10.9459	10.197	1.6806	0.004227	0.0654117
PGD	5226	phosphogluconate dehydrogenase	10.8901	10.1421	1.67948	0.152101	0.473341
SEC14L2	23541	SEC14-like lipid binding 2	6.32754	5.57967	1.6793	0.561112	0.823958
CLTC	1213	clathrin, heavy chain (Hc)	13.8147	13.0669	1.67928	0.0364173	0.228319
RASGRP4	115727	RAS guanyl releasing protein 4	4.23778	3.48996	1.67925	0.00930711	0.103752
TSHR	7253	thyroid stimulating hormone receptor	3.54383	2.79615	1.67909	0.151235	0.471957
FBXO11	80204	F-box protein 11	9.42963	8.68203	1.67899	0.00269944	0.0502707
ALDH4A1	8659	aldehyde dehydrogenase 4 family, member A1	7.02906	6.28181	1.67858	0.00147448	0.0347603
TCEB3CL2	100506888	transcription elongation factor B polypeptide 3C-like 2	5.31258	4.56584	1.67799	0.262909	0.602029
GLYR1	84656	glyoxylate reductase 1 homolog (Arabidopsis)	11.4135	10.6672	1.67747	0.00101111	0.0270529
GLB1	2720	galactosidase beta 1	10.3825	9.63647	1.67714	0.00308205	0.0547216
GALNT2	2590	polypeptide N-acetylgalactosaminyltransferase 2	7.5822	6.83632	1.677	0.00889381	0.100556
PHACTR4	65979	phosphatase and actin regulator 4	9.93968	9.19408	1.67667	0.00181767	0.0390165
SIX3	6496	SIX homeobox 3	4.12562	3.38007	1.67662	0.0940422	0.378427
MMS19	64210	MMS19 homolog, cytosolic iron-sulfur assembly component	10.0912	9.34564	1.6766	0.10495	0.400313
UVRAG		Memczak2013 ALT_ACCEPTOR, ALT_DONOR, coding, INTERNAL, intronic best transcript NM_003369	6.71266	5.96799	1.67559	0.00251707	0.0480303
POM121C	100101267	POM121 transmembrane nucleoporin C	12.7782	12.0336	1.67553	0.00578632	0.0794018
SP5	389058	Sp5 transcription factor	4.35677	3.61221	1.67546	0.0369637	0.230365
SUOX	6821	sulfite oxidase	9.13463	8.39053	1.67493	0.00117957	0.0297291
ZNF570	148268	zinc finger protein 570	3.40058	2.6565	1.67491	0.0491573	0.268004
PITPNC1	26207	phosphatidylinositol transfer protein, cytoplasmic 1	10.7275	9.98359	1.67472	0.000614493	0.0197893
SLC1A5	6510	solute carrier family 1 (neutral amino acid transporter), member 5	14.1744	13.4306	1.67463	0.00310206	0.0549859
LPCAT4	254531	lysophosphatidylcholine acyltransferase 4	9.53062	8.78735	1.67396	0.149027	0.467782
TNRC6A	27327	trinucleotide repeat containing 6A	10.9661	10.2231	1.67367	0.00697165	0.0879981
UHRF1BP1	54887	UHRF1 binding protein 1	8.92349	8.18048	1.67366	0.00107203	0.0279379
CASD1	64921	CAS1 domain containing 1	10.0269	9.28396	1.67356	0.00468596	0.0696979
MSX2	4488	msh homeobox 2	5.02554	4.28274	1.67342	0.120645	0.4278
FAM175A	84142	family with sequence similarity 175, member A	9.27657	8.53389	1.67327	0.147634	0.466479
DDHD2	23259	DDHD domain containing 2	9.49711	8.75453	1.67317	0.00119024	0.0298576
PTPN14	5784	protein tyrosine phosphatase, non-receptor type 14	7.72065	6.97812	1.6731	0.00512176	0.0732344
ZNF594	84622	zinc finger protein 594	6.97357	6.23109	1.67304	0.00181744	0.0390165
TCAF1	9747	TRPM8 channel-associated factor 1	8.20245	7.46055	1.67238	0.0036235	0.0603861
STRN4	29888	striatin, calmodulin binding protein 4	9.27962	8.53812	1.67192	0.0989945	0.388871
PPP1R1B	84152	protein phosphatase 1, regulatory (inhibitor) subunit 1B	5.70361	4.96256	1.67139	0.0341963	0.219775
FAM195A	84331	family with sequence similarity 195, member A	6.37665	5.63577	1.67119	0.269023	0.608586
DAG1	1605	dystroglycan 1 (dystrophin-associated glycoprotein 1)	10.8035	10.063	1.67078	0.00933022	0.103848
PRAMEF25	441873	PRAME family member 25	5.58176	4.84148	1.67049	0.0204705	0.162287
UBR3	130507	ubiquitin protein ligase E3 component n-recognin 3 (putative)	8.77353	8.03327	1.67048	0.00760608	0.0922206
FAM98B	283742	family with sequence similarity 98, member B	11.5101	10.7702	1.67012	0.00172355	0.0378447
MYO6	4646	myosin VI	12.1789	11.4392	1.66977	0.00795225	0.094284
DNPH1	10591	2-deoxynucleoside 5-phosphate N-hydrolase 1	9.2789	8.53989	1.66902	0.157395	0.480064
PLD2	5338	phospholipase D2	6.61791	5.87904	1.66886	0.00187375	0.0397318
CYTH2	9266	cytohesin 2	11.9892	11.2503	1.6688	0.00354908	0.0597494
NOSTRIN	115677	nitric oxide synthase trafficking	8.96266	8.22398	1.66864	0.00948598	0.104766
MTHFS	10588	5,10-methenyltetrahydrofolate synthetase (5-formyltetrahydrofolate cyclo-ligase)	7.62998	6.89179	1.66808	0.559102	0.822768
HOMER1	9456	homer scaffolding protein 1	8.41559	7.67751	1.66795	0.00137155	0.0330528
MBD6	114785	methyl-CpG binding domain protein 6	8.77326	8.03536	1.66775	0.00248176	0.047696
BCL9	607	B-cell CLL/lymphoma 9	8.93802	8.20016	1.66771	0.00206405	0.0421216
SERHL	94009	serine hydrolase-like (pseudogene)	6.13881	5.40095	1.6677	0.00997783	0.108357
CCIN	881	calicin	4.1004	3.36263	1.6676	0.96608	0.990992
PIK3R2	5296	phosphoinositide-3-kinase, regulatory subunit 2 (beta)	5.93037	5.19284	1.66732	0.0555845	0.288035
NCDN	23154	neurochondrin	5.97969	5.24306	1.66629	0.0174256	0.149989
MYCBP2	23077	MYC binding protein 2, E3 ubiquitin protein ligase	10.3767	9.64048	1.66584	0.0349521	0.222647
GSTM4	2948	glutathione S-transferase mu 4	4.71501	3.97997	1.66445	0.00477642	0.0705056
MAVS	57506	mitochondrial antiviral signaling protein	8.79197	8.05712	1.66423	0.0166602	0.146086
VPS18	57617	VPS18 CORVET/HOPS core subunit	8.12716	7.39235	1.66419	0.00134593	0.0326938
AHR	196	aryl hydrocarbon receptor	14.4407	13.7061	1.66394	0.00142146	0.0338374
ANKRD52	283373	ankyrin repeat domain 52	6.97642	6.24222	1.66348	0.00718844	0.0893676
FAM120A	23196	family with sequence similarity 120A	12.3321	11.5981	1.66323	0.000871362	0.0247864
AP1M2	10053	adaptor-related protein complex 1, mu 2 subunit	11.8289	11.0952	1.66282	0.0108803	0.114285
GSE1	23199	Gse1 coiled-coil protein	9.78653	9.053	1.66271	0.0421176	0.24641
CACNB3	784	calcium channel, voltage-dependent, beta 3 subunit	8.94637	8.21298	1.66254	0.0652179	0.312752
GALNT12	79695	polypeptide N-acetylgalactosaminyltransferase 12	10.9356	10.2024	1.66236	0.00312538	0.0551259
RAB1B	81876	RAB1B, member RAS oncogene family	15.4464	14.7134	1.66212	0.00408591	0.0643017
GTF2I	2969	general transcription factor IIi	14.078	13.3452	1.66189	0.00221375	0.0442091
ATP1A2	477	ATPase, Na+/K+ transporting, alpha 2 polypeptide	4.89087	4.15915	1.66062	0.00491606	0.0716712
ZNF687	57592	zinc finger protein 687	8.69584	7.96414	1.66059	0.0409316	0.24238
H3F3AP4		Homo sapiens H3 histone, family 3A, pseudogene 4 (H3F3AP4), non-coding RNA.	14.2365	13.5055	1.65974	0.00175288	0.0383391
VAMP2	6844	vesicle associated membrane protein 2	6.87194	6.14105	1.65966	0.00813	0.0951814
FDXR		Zhang2013 ALT_ACCEPTOR, ALT_DONOR, coding, INTERNAL, intronic best transcript NM_004110	3.65212	2.92136	1.65951	0.0798484	0.348796
OR8D4	338662	olfactory receptor, family 8, subfamily D, member 4	3.57877	2.8482	1.65929	0.133784	0.446644
PCYOX1	51449	prenylcysteine oxidase 1	11.6898	10.9596	1.65889	0.00256659	0.0485073
TRIM28	10155	tripartite motif containing 28	11.146	10.4159	1.65877	0.000911471	0.0255545
HNRNPA0	10949	heterogeneous nuclear ribonucleoprotein A0	10.5679	9.83787	1.65868	0.00115884	0.0294488
PIEZO2	63895	piezo-type mechanosensitive ion channel component 2	4.78571	4.05594	1.65837	0.012727	0.124986
KLK5	25818	kallikrein related peptidase 5	4.07164	3.34201	1.65822	0.143294	0.459583
EP300	2033	E1A binding protein p300	8.58662	7.85701	1.65819	0.00338825	0.0580905
FOXQ1	94234	forkhead box Q1	4.6138	3.88459	1.65773	0.11197	0.414056
FOXRED2	80020	FAD-dependent oxidoreductase domain containing 2	6.07567	5.34653	1.65765	0.00228693	0.045152
SATB1	6304	SATB homeobox 1	9.90306	9.17393	1.65765	0.00268129	0.0500507
TRPS1	7227	trichorhinophalangeal syndrome I	9.36211	8.63337	1.65719	0.00180309	0.0388669
DGKZ	8525	diacylglycerol kinase, zeta	7.08676	6.35834	1.65682	0.00294867	0.0530563
BRD4	23476	bromodomain containing 4	11.3997	10.6714	1.65673	0.00467141	0.0696029
PORCN	64840	porcupine homolog (Drosophila)	7.28393	6.55569	1.65661	0.00335206	0.057562
PLEKHH1	57475	pleckstrin homology domain containing, family H (with MyTH4 domain) member 1	8.00853	7.28074	1.65609	0.00415489	0.0647229
ADRB2	154	adrenoceptor beta 2, surface	3.61705	2.88927	1.65609	0.242103	0.582666
ZNF276	92822	zinc finger protein 276	5.11781	4.39028	1.6558	0.0590078	0.297024
CTSB	1508	cathepsin B	12.98	12.2526	1.65562	0.0126115	0.124572
NEXN	91624	nexilin (F actin binding protein)	4.45875	3.73158	1.65539	0.283733	0.625115
DAP	1611	death-associated protein	10.6765	9.95026	1.65435	0.00243848	0.0472627
NMNAT1	64802	nicotinamide nucleotide adenylyltransferase 1	7.31023	6.5844	1.65386	0.00351206	0.0593506
KIAA1522	57648	KIAA1522	8.34923	7.62359	1.65364	0.0153985	0.140519
NAA60	79903	N(alpha)-acetyltransferase 60, NatF catalytic subunit	12.3145	11.5896	1.65283	0.0211531	0.165642
ADRBK1	156	adrenergic, beta, receptor kinase 1	9.10318	8.37827	1.65279	0.00384876	0.0624418
AKR7A3	22977	aldo-keto reductase family 7, member A3 (aflatoxin aldehyde reductase)	8.78025	8.05542	1.6527	0.0242865	0.181056
ARFGEF1	10565	ADP-ribosylation factor guanine nucleotide-exchange factor 1 (brefeldin A-inhibited)	9.80179	9.0772	1.65243	0.0118375	0.119734
ZNF780A	284323	zinc finger protein 780A	8.71598	7.9914	1.65242	0.0065985	0.0852044
IPP	3652	intracisternal A particle-promoted polypeptide	7.57217	6.84822	1.65169	0.0444873	0.254308
CPT1A	1374	carnitine palmitoyltransferase 1A (liver)	9.01795	8.29403	1.65166	0.000752672	0.0224213
MEAF6	64769	MYST/Esa1-associated factor 6	10.3379	9.61419	1.65147	0.40568	0.724523
TRMT2A		Memczak2013 ANTISENSE, CDS, coding, INTERNAL, UTR3 best transcript NM_022727	3.69068	2.96711	1.65126	0.00443101	0.067211
ARMT1	79624	acidic residue methyltransferase 1	10.4468	9.72345	1.65097	0.262992	0.60212
POLR2E	5434	polymerase (RNA) II (DNA directed) polypeptide E, 25kDa	11.6843	10.9611	1.65087	0.0175437	0.150571
YBX2	51087	Y box binding protein 2	6.03522	5.31205	1.65081	0.00638269	0.0835241
FBP1	2203	fructose-1,6-bisphosphatase 1	11.1761	10.4529	1.65081	0.034204	0.219775
TIAM2	26230	T-cell lymphoma invasion and metastasis 2	4.83576	4.11316	1.65016	0.0369418	0.230328
NARS	4677	asparaginyl-tRNA synthetase	12.6386	11.9162	1.64989	0.0624161	0.306059
NAT1	9	N-acetyltransferase 1 (arylamine N-acetyltransferase)	5.53469	4.81248	1.64971	0.251909	0.590711
HSBP1L1	440498	heat shock factor binding protein 1-like 1	8.93902	8.21714	1.64933	0.0193312	0.157601
CATSPERB	79820	catsper channel auxiliary subunit beta	5.67791	4.95604	1.64932	0.000961325	0.0262322
TMTC2	160335	transmembrane and tetratricopeptide repeat containing 2	10.3007	9.57917	1.64896	0.00556131	0.077199
AGRN	375790	agrin	11.1625	10.4419	1.64793	0.0135143	0.130161
NLN	57486	neurolysin (metallopeptidase M3 family)	10.9133	10.193	1.6476	0.00198544	0.0411017
HSD17B10	3028	hydroxysteroid (17-beta) dehydrogenase 10	9.63398	8.91368	1.64753	0.0040976	0.0643674
SNX1	6642	sorting nexin 1	10.0515	9.33117	1.6475	0.0401606	0.240001
WNK1	65125	WNK lysine deficient protein kinase 1	9.90834	9.1881	1.64746	0.00547295	0.0764732
NFIA	4774	nuclear factor I/A	9.5946	8.87499	1.64675	0.00961054	0.105574
RCBTB1	55213	regulator of chromosome condensation (RCC1) and BTB (POZ) domain containing protein 1	9.40719	8.68783	1.64644	0.0464381	0.260462
POR	5447	P450 (cytochrome) oxidoreductase	9.45727	8.73816	1.64617	0.00684027	0.08712
GSK3B	2932	glycogen synthase kinase 3 beta	12.8443	12.1258	1.64542	0.0109417	0.114533
PTPN6	5777	protein tyrosine phosphatase, non-receptor type 6	6.88127	6.1635	1.64464	0.092189	0.374361
KIF3B	9371	kinesin family member 3B	11.0516	10.3339	1.64451	0.00350364	0.0593506
ARHGAP35	2909	Rho GTPase activating protein 35	11.7162	10.9987	1.64441	0.00371522	0.0612953
KIAA2026	158358	KIAA2026	5.33863	4.62139	1.64403	0.0404163	0.240224
FZD3	7976	frizzled class receptor 3	7.15231	6.43513	1.64396	0.0039415	0.0631819
TBCD	6904	tubulin folding cofactor D	9.43145	8.71428	1.64395	0.0145305	0.135796
HOXB7	3217	homeobox B7	9.50769	8.79057	1.6439	0.00159848	0.036203
SLC22A20	440044	solute carrier family 22, member 20	4.9977	4.28083	1.64362	0.229874	0.569551
GPR176	11245	G protein-coupled receptor 176	4.59169	3.87515	1.64324	0.136857	0.450852
IKBKAP	8518	inhibitor of kappa light polypeptide gene enhancer in B-cells, kinase complex-associated protein	8.39925	7.68295	1.64297	0.0150462	0.138377
CDH7	1005	cadherin 7, type 2	6.14409	5.42781	1.64294	0.121077	0.42828
NFIC	4782	nuclear factor I/C (CCAAT-binding transcription factor)	9.4008	8.68458	1.64287	0.00235756	0.0460939
CRYBA2	1412	crystallin beta A2	4.08831	3.37213	1.64282	0.0341912	0.219775
BCL7A	605	B-cell CLL/lymphoma 7A	7.30331	6.58726	1.64268	0.0445774	0.254484
ANGPTL7	10218	angiopoietin like 7	4.5347	3.81884	1.64247	0.00937967	0.104128
LRP6	4040	LDL receptor related protein 6	9.95516	9.24039	1.64122	0.00155484	0.0356439
TSTD1	100131187	thiosulfate sulfurtransferase (rhodanese)-like domain containing 1	10.6516	9.93686	1.64118	0.0202615	0.161524
ELAVL1	1994	ELAV like RNA binding protein 1	12.229	11.5146	1.64087	0.00556461	0.077199
DYRK1B	9149	dual specificity tyrosine-(Y)-phosphorylation regulated kinase 1B	7.21412	6.49988	1.64062	0.0718529	0.329436
TBX3	6926	T-box 3	9.33763	8.62372	1.64024	0.101528	0.393918
MPHOSPH6	10200	M-phase phosphoprotein 6	9.67876	8.96492	1.64016	0.233726	0.573828
EXTL2	2135	exostosin-like glycosyltransferase 2	8.7389	8.02507	1.64015	0.0275561	0.194477
RRP36	88745	ribosomal RNA processing 36	6.1368	5.42303	1.64008	0.00973053	0.106371
RNF123	63891	ring finger protein 123	8.7848	8.07103	1.64008	0.0129976	0.126772
SLC39A5	283375	solute carrier family 39 (zinc transporter), member 5	7.26956	6.55583	1.64004	0.100414	0.391582
GNB1	2782	guanine nucleotide binding protein (G protein), beta polypeptide 1	14.698	13.9843	1.64002	0.0033733	0.0578804
PSG6	5675	pregnancy specific beta-1-glycoprotein 6	5.10729	4.394	1.63953	0.0885916	0.366817
CXXC5	51523	CXXC finger protein 5	8.61191	7.89872	1.63943	0.00536578	0.0755224
SEPT8	23176	septin 8	9.52292	8.80978	1.63937	0.0029273	0.0527603
WDR81	124997	WD repeat domain 81	5.45007	4.73704	1.63925	0.0208361	0.163877
CCZ1B	221960	CCZ1 homolog B, vacuolar protein trafficking and biogenesis associated	4.51891	3.80594	1.63917	0.416973	0.732812
CD52	1043	CD52 molecule	6.87982	6.16686	1.63916	0.00213588	0.0432581
WDR1		Jeck2013 ANTISENSE, CDS, coding, INTERNAL, intronic, OVCODE, OVEXON best transcript NM_017491	4.88162	4.1691	1.63866	0.670991	0.878167
INTS2	57508	integrator complex subunit 2	8.15296	7.44068	1.6384	0.0076794	0.0926053
MINK1	50488	misshapen-like kinase 1	7.4958	6.78385	1.63802	0.00323735	0.0562214
SLC39A3	29985	solute carrier family 39 (zinc transporter), member 3	7.55983	6.84799	1.6379	0.00467632	0.0696029
ZNF277	11179	zinc finger protein 277	10.1079	9.39613	1.63778	0.102537	0.396113
SIL1	64374	SIL1 nucleotide exchange factor	5.06599	4.35433	1.63769	0.0097245	0.10636
TAF15	8148	TATA box binding protein associated factor 15	14.2767	13.5651	1.63757	0.00524005	0.0743311
C21orf33	8209	chromosome 21 open reading frame 33	9.88501	9.17378	1.6372	0.180674	0.51143
KRT3	3850	keratin 3, type II	3.0728	2.36165	1.63711	0.0157884	0.141989
C11orf96	387763	chromosome 11 open reading frame 96	4.55421	3.84341	1.63672	0.128164	0.438194
GSTO2	119391	glutathione S-transferase omega 2	9.34387	8.63351	1.63622	0.0330207	0.215857
GLIS2	84662	GLIS family zinc finger 2	8.28463	7.57428	1.63619	0.0228613	0.173506
ETS2	2114	v-ets avian erythroblastosis virus E26 oncogene homolog 2	15.8909	15.1806	1.63618	0.00251128	0.0480053
C1QTNF6	114904	C1q and tumor necrosis factor related protein 6	7.92356	7.21352	1.63586	0.0248565	0.183189
PGBD2	267002	piggyBac transposable element derived 2	6.29185	5.58185	1.63581	0.0355437	0.225145
CD24	100133941	CD24 molecule	16.5472	15.8376	1.63534	0.00314101	0.0552487
RBM3	5935	RNA binding motif (RNP1, RRM) protein 3	13.3649	12.656	1.63463	0.0591403	0.297328
SCMH1	22955	sex comb on midleg homolog 1 (Drosophila)	9.35886	8.65009	1.63441	0.0811624	0.350962
SRC	6714	SRC proto-oncogene, non-receptor tyrosine kinase	11.7689	11.0605	1.63397	0.00899664	0.101238
DNAJC13	23317	DnaJ (Hsp40) homolog, subfamily C, member 13	11.5194	10.8113	1.6336	0.00970928	0.106247
FNIP1	96459	folliculin interacting protein 1	10.9945	10.2877	1.63223	0.204274	0.538101
USE1	55850	unconventional SNARE in the ER 1 homolog (S. cerevisiae)	10.9224	10.2157	1.63213	0.0503535	0.271879
BEND3	57673	BEN domain containing 3	5.64224	4.93551	1.63211	0.00778378	0.0930065
GLT8D2	83468	glycosyltransferase 8 domain containing 2	3.42379	2.71733	1.63179	0.0668959	0.317109
LMOD3	56203	leiomodin 3 (fetal)	3.32914	2.62281	1.63165	0.0313009	0.209729
ZBTB7B	51043	zinc finger and BTB domain containing 7B	8.76549	8.05946	1.63131	0.172862	0.501155
SLC39A10	57181	solute carrier family 39 (zinc transporter), member 10	11.2102	10.5044	1.63107	0.013247	0.128562
PHF23	79142	PHD finger protein 23	7.30626	6.60065	1.63084	0.00653837	0.0847341
ENTPD2	954	ectonucleoside triphosphate diphosphohydrolase 2	6.9592	6.25365	1.63076	0.00180138	0.0388669
CDC42EP4	23580	CDC42 effector protein (Rho GTPase binding) 4	5.98232	5.27679	1.63074	0.286438	0.627724
RAVER1	125950	ribonucleoprotein, PTB-binding 1	7.79552	7.0901	1.63062	0.0296769	0.202648
HINT3	135114	histidine triad nucleotide binding protein 3	9.12709	8.4217	1.63059	0.00631083	0.0830907
RS1	6247	retinoschisin 1	3.47575	2.77089	1.62999	0.118275	0.423486
SSH2	85464	slingshot protein phosphatase 2	9.51531	8.8107	1.6297	0.0647326	0.311878
SCG3	29106	secretogranin III	3.69814	2.9937	1.62952	0.0353332	0.224474
GYG2	8908	glycogenin 2	5.37794	4.6736	1.62939	0.0563038	0.289663
MAVS		Jeck2013 ANTISENSE, coding, INTERNAL, OVEXON, UTR3 best transcript NM_020746	11.2591	10.555	1.62913	0.0317848	0.211452
CXorf36	79742	chromosome X open reading frame 36	3.22305	2.51951	1.6285	0.145827	0.463043
CBX5	23468	chromobox homolog 5	11.5881	10.8849	1.62813	0.00730297	0.0901232
LASP1	3927	LIM and SH3 protein 1	13.3694	12.6663	1.62798	0.00381265	0.062091
SOWAHC	65124	sosondowah ankyrin repeat domain family member C	6.85798	6.15494	1.62793	0.00986456	0.107453
HOXC9	3225	homeobox C9	5.59875	4.89599	1.62762	0.00701358	0.0882019
MAGEF1	64110	MAGE family member F1	9.4464	8.74364	1.62762	0.10364	0.398156
SSBP4	170463	single stranded DNA binding protein 4	5.07353	4.37162	1.62665	0.0716551	0.32928
OVOL2	58495	ovo-like zinc finger 2	6.7478	6.04604	1.6265	0.13615	0.450082
U2AF2		Memczak2013 ALT_ACCEPTOR, ALT_DONOR, coding, INTERNAL, intronic best transcript NM_001012478	8.38615	7.68441	1.62647	0.00364336	0.0606228
ARV1	64801	ARV1 homolog, fatty acid homeostasis modulator	9.59528	8.89363	1.62637	0.00197496	0.0410058
VDR	7421	vitamin D (1,25- dihydroxyvitamin D3) receptor	10.4948	9.79318	1.62629	0.00396092	0.0633983
COX6C	1345	cytochrome c oxidase subunit VIc	11.2998	10.5984	1.62604	0.0394054	0.23754
SERPINI2	5276	serpin peptidase inhibitor, clade I (pancpin), member 2	4.91076	4.21022	1.6251	0.468365	0.766031
WSB2	55884	WD repeat and SOCS box containing 2	12.9009	12.2005	1.62498	0.00420563	0.0651751
ARHGEF1	9138	Rho guanine nucleotide exchange factor 1	5.79589	5.09569	1.62473	0.00712777	0.0888817
CXXC1	30827	CXXC finger protein 1	6.78736	6.08718	1.62472	0.00384381	0.0624418
ADAMTS17		Memczak2013 ANTISENSE, coding, INTERNAL, intronic best transcript NM_139057	6.58874	5.88859	1.62467	0.483931	0.775857
OR11H7	390441	olfactory receptor, family 11, subfamily H, member 7 (gene/pseudogene)	4.38463	3.68466	1.62448	0.293127	0.633996
FOXO3	2309	forkhead box O3	10.8225	10.1229	1.62413	0.00272221	0.0505069
PRPF8	10594	pre-mRNA processing factor 8	11.0492	10.35	1.62365	0.00403435	0.0637648
PASK	23178	PAS domain containing serine/threonine kinase	5.05252	4.35335	1.62357	0.134568	0.447212
MACF1	23499	microtubule-actin crosslinking factor 1	11.0584	10.3604	1.62234	0.0118405	0.119734
MTRNR2L13	100463500	MT-RNR2-like 13	4.06383	3.36613	1.62192	0.279222	0.619377
BLOC1S1-RDH5	100528022	BLOC1S1-RDH5 readthrough	8.805	8.10752	1.62167	0.300822	0.641163
CYP2B6	1555	cytochrome P450, family 2, subfamily B, polypeptide 6	7.78991	7.09253	1.62155	0.00228833	0.045152
TTC6	319089	tetratricopeptide repeat domain 6	5.61583	4.91889	1.62106	0.150444	0.470573
UBE2E3	10477	ubiquitin-conjugating enzyme E2E 3	9.07437	8.37757	1.62091	0.00888691	0.100556
LIPC	3990	lipase, hepatic	4.2878	3.59112	1.62077	0.0204421	0.162266
OR2AG1	144125	olfactory receptor, family 2, subfamily AG, member 1 (gene/pseudogene)	3.91256	3.21595	1.62069	0.179674	0.510146
RALGAPA2	57186	Ral GTPase activating protein, alpha subunit 2 (catalytic)	10.3249	9.62832	1.62067	0.00278803	0.0511091
CDK11A	728642	cyclin-dependent kinase 11A	10.8745	10.1779	1.62064	0.309121	0.648349
WFIKKN1	117166	WAP, follistatin/kazal, immunoglobulin, kunitz and netrin domain containing 1	6.08511	5.38866	1.62051	0.0224451	0.17144
DGKD	8527	diacylglycerol kinase, delta 130kDa	5.02104	4.32463	1.62047	0.113383	0.416841
TPP2	7174	tripeptidyl peptidase II	11.4561	10.7606	1.61954	0.00408931	0.0643017
LGALSL	29094	lectin, galactoside-binding-like	8.49876	7.80326	1.61944	0.00733071	0.0904135
GAMT	2593	guanidinoacetate N-methyltransferase	4.18529	3.48999	1.61923	0.00926897	0.103381
MED28	80306	mediator complex subunit 28	10.2595	9.56421	1.61921	0.0060478	0.0814885
HNRNPM	4670	heterogeneous nuclear ribonucleoprotein M	15.3804	14.6853	1.61899	0.0104885	0.11179
ARHGEF37	389337	Rho guanine nucleotide exchange factor 37	3.50635	2.81128	1.61896	0.160125	0.483557
MAN2C1	4123	mannosidase, alpha, class 2C, member 1	6.89323	6.19843	1.61865	0.0964736	0.382541
DIP2B	57609	disco-interacting protein 2 homolog B	12.2956	11.6009	1.61858	0.00664405	0.0856379
LRBA	987	LPS-responsive vesicle trafficking, beach and anchor containing	13.5495	12.8553	1.61795	0.00301691	0.0540123
TRPM7	54822	transient receptor potential cation channel, subfamily M, member 7	8.78819	8.09454	1.61737	0.534006	0.809407
PVRL2	5819	poliovirus receptor-related 2 (herpesvirus entry mediator B)	12.3477	11.6541	1.61732	0.00645613	0.0840084
PRAMEF25	441873	PRAME family member 25	4.9454	4.2518	1.61731	0.0120189	0.120684
HNMT	3176	histamine N-methyltransferase	10.8051	10.1116	1.61722	0.0780331	0.344444
GPR157	80045	G protein-coupled receptor 157	7.2938	6.60048	1.617	0.0732389	0.332315
BAIAP3	8938	BAI1-associated protein 3	6.41552	5.72303	1.61607	0.0712605	0.327911
FOXA3	3171	forkhead box A3	4.99726	4.30508	1.61573	0.0933844	0.376983
AGPAT1	10554	1-acylglycerol-3-phosphate O-acyltransferase 1	9.67669	8.98472	1.61549	0.00815575	0.0954307
CDH6	1004	cadherin 6, type 2, K-cadherin (fetal kidney)	3.48649	2.79459	1.61541	0.0370651	0.230427
MBD3	53615	methyl-CpG binding domain protein 3	8.21341	7.52154	1.61538	0.182061	0.513079
GNAI2	2771	guanine nucleotide binding protein (G protein), alpha inhibiting activity polypeptide 2	12.0172	11.3256	1.61512	0.00392398	0.0630423
ACTL7B	10880	actin-like 7B	6.32808	5.63731	1.61415	0.107052	0.404661
CEP76	79959	centrosomal protein 76kDa	7.33703	6.6465	1.61388	0.0317486	0.211308
HMBS	3145	hydroxymethylbilane synthase	3.61503	2.92459	1.61377	0.455348	0.759051
BRD7	29117	bromodomain containing 7	11.0153	10.325	1.61366	0.0157055	0.141819
ELAC1	55520	elaC ribonuclease Z 1	6.36584	5.67589	1.61323	0.00489524	0.0715699
ERCC1	2067	excision repair cross-complementation group 1	11.2066	10.5168	1.61306	0.1364	0.450495
EDC4	23644	enhancer of mRNA decapping 4	5.99348	5.30394	1.61277	0.0264067	0.18956
FRAT2	23401	frequently rearranged in advanced T-cell lymphomas 2	4.04199	3.3526	1.6126	0.0164232	0.145438
TMEM52	339456	transmembrane protein 52	8.59664	7.90745	1.61238	0.356403	0.687201
DOPEY1	23033	dopey family member 1	8.52025	7.83126	1.61216	0.0338926	0.218827
PLEKHA2	59339	pleckstrin homology domain containing, family A (phosphoinositide binding specific) member 2	6.02938	5.34065	1.61187	0.00286549	0.0518642
GUCY1A3	2982	guanylate cyclase 1, soluble, alpha 3	3.1258	2.43738	1.61151	0.153085	0.474956
FAM102A	399665	family with sequence similarity 102, member A	7.3914	6.70299	1.6115	0.0119512	0.120343
STXBP5L	9515	syntaxin binding protein 5-like	4.71604	4.02793	1.61118	0.306723	0.646481
SNRNP200	23020	small nuclear ribonucleoprotein, U5 200kDa subunit	13.7535	13.0655	1.61109	0.00494632	0.0720159
PTGR2	145482	prostaglandin reductase 2	7.16829	6.48051	1.61081	0.0783546	0.3451
PIEZO1	9780	piezo-type mechanosensitive ion channel component 1	6.65977	5.97213	1.61065	0.0190059	0.156525
SLAMF9	89886	SLAM family member 9	3.98654	3.29897	1.61056	0.066017	0.315142
GJC2	57165	gap junction protein gamma 2	7.45137	6.76382	1.61054	0.0114381	0.117868
DCTN3	11258	dynactin 3 (p22)	9.65983	8.97257	1.61023	0.0498466	0.269977
ANKRD20A4	728747	ankyrin repeat domain 20 family, member A4	3.85897	3.17176	1.61016	0.0857848	0.361607
ACSL5	51703	acyl-CoA synthetase long-chain family member 5	14.8826	14.1957	1.6098	0.00197748	0.0410183
AP2M1	1173	adaptor-related protein complex 2, mu 1 subunit	11.9308	11.2441	1.60963	0.0590423	0.297054
NAT8	9027	N-acetyltransferase 8 (GCN5-related, putative)	4.10238	3.41605	1.60919	0.199691	0.532564
SHROOM1	134549	shroom family member 1	5.76815	5.08237	1.60858	0.00932185	0.103848
BCL2L14	79370	BCL2-like 14 (apoptosis facilitator)	6.29658	5.61102	1.60832	0.0137062	0.131237
GAP43	2596	growth associated protein 43	5.26583	4.58046	1.60811	0.00390886	0.0629479
NYX	60506	nyctalopin	5.277	4.59197	1.60774	0.0212955	0.166294
L3MBTL4		Memczak2013 ANTISENSE, coding, INTERNAL, intronic best transcript NM_173464	3.00196	2.3172	1.60743	0.0174418	0.150057
MIDN	90007	midnolin	10.8956	10.2109	1.60738	0.00444824	0.0673771
TRIM24	8805	tripartite motif containing 24	10.7174	10.0328	1.60723	0.00106592	0.0278124
PTGES3L-AARSD1	100885850	PTGES3L-AARSD1 readthrough	8.75756	8.07351	1.60664	0.235801	0.576151
SKAP1	8631	src kinase associated phosphoprotein 1	7.49156	6.80752	1.60663	0.0222021	0.170523
SPAG7	9552	sperm associated antigen 7	6.83517	6.15156	1.60616	0.335312	0.669742
FKBP10	60681	FK506 binding protein 10	9.31731	8.63372	1.60613	0.00412396	0.0645625
HK1	3098	hexokinase 1	10.0447	9.36118	1.60599	0.064131	0.310874
BCAS1	8537	breast carcinoma amplified sequence 1	12.4098	11.7263	1.60598	0.0145746	0.136148
MLXIP	22877	MLX interacting protein	9.74722	9.0639	1.60584	0.00381204	0.062091
ACTL8	81569	actin-like 8	4.03856	3.35528	1.60579	0.0101665	0.109849
WASF1	8936	WAS protein family, member 1	8.08048	7.39729	1.60569	0.00253341	0.0482044
ANKRD6	22881	ankyrin repeat domain 6	5.04967	4.36657	1.60558	0.0185204	0.154743
BUD31	8896	BUD31 homolog	9.52921	8.84613	1.60556	0.0700114	0.324952
NSD1	64324	nuclear receptor binding SET domain protein 1	10.1777	9.49492	1.60522	0.00432211	0.066452
LCOR	84458	ligand dependent nuclear receptor corepressor	11.8687	11.1861	1.60498	0.00837103	0.0972148
SH2B1	25970	SH2B adaptor protein 1	6.34268	5.66018	1.60492	0.147945	0.466773
VPS11		VPS11, CORVET/HOPS core subunit [Source:HGNC Symbol;Acc:HGNC:14583]	9.07667	8.39434	1.60473	0.0384494	0.235308
PUSL1	126789	pseudouridylate synthase-like 1	6.55042	5.86819	1.60462	0.104494	0.39941
DEPTOR	64798	DEP domain containing MTOR-interacting protein	5.38031	4.69826	1.60442	0.00351464	0.0593506
CR2	1380	complement component (3d/Epstein Barr virus) receptor 2	4.0723	3.39039	1.60426	0.00374797	0.0615516
VILL	50853	villin-like	4.07648	3.39459	1.60425	0.101298	0.393379
PLPP1	8611	phospholipid phosphatase 1	9.27605	8.59521	1.60308	0.0893458	0.367982
FBL	2091	fibrillarin	13.693	13.0122	1.60307	0.014471	0.135476
HSDL2	84263	hydroxysteroid dehydrogenase like 2	12.1501	11.4695	1.60289	0.0182627	0.153933
FBL	2091	fibrillarin	13.441	12.7604	1.60277	0.0150394	0.138377
ZNF780A	284323	zinc finger protein 780A	7.65949	6.97933	1.60231	0.0647516	0.311878
C20orf27	54976	chromosome 20 open reading frame 27	8.68906	8.00908	1.60211	0.0585605	0.295809
BCL2L14	79370	BCL2-like 14 (apoptosis facilitator)	3.91186	3.23196	1.60203	0.00136092	0.0328335
LSS	4047	lanosterol synthase (2,3-oxidosqualene-lanosterol cyclase)	9.9739	9.29423	1.60178	0.00550403	0.0767557
GPR37	2861	G protein-coupled receptor 37 (endothelin receptor type B-like)	5.24756	4.56802	1.60163	0.0439091	0.251986
MAFF	23764	v-maf avian musculoaponeurotic fibrosarcoma oncogene homolog F	6.88926	6.20989	1.60144	0.0518873	0.2766
VASN	114990	vasorin	4.33346	3.6543	1.60121	0.0199181	0.160181
SF3A1	10291	splicing factor 3a, subunit 1, 120kDa	10.8001	10.121	1.60109	0.00540106	0.0757136
CCS	9973	copper chaperone for superoxide dismutase	7.52293	6.84393	1.60103	0.0161965	0.144142
METTL9	51108	methyltransferase like 9	12.9056	12.2266	1.60096	0.0233681	0.176479
LDB1	8861	LIM domain binding 1	13.2205	12.5416	1.60091	0.00166825	0.0371168
KCNN2	3781	potassium channel, calcium activated intermediate/small conductance subfamily N alpha, member 2	3.164	2.48585	1.60009	0.513975	0.797044
MYO9B		Memczak2013 ANTISENSE, CDS, coding, INTERNAL best transcript NM_004145	7.17793	6.49992	1.59993	0.00424443	0.0655396
HOXA3	3200	homeobox A3	10.9655	10.2881	1.59915	0.00690894	0.0876822
TDRKH	11022	tudor and KH domain containing	8.62879	7.95151	1.59913	0.032077	0.212606
NCOA2	10499	nuclear receptor coactivator 2	10.0171	9.3407	1.59813	0.0133962	0.129657
INPP5D	3635	inositol polyphosphate-5-phosphatase D	5.77691	5.10059	1.59806	0.152748	0.474391
KDELR1	10945	KDEL (Lys-Asp-Glu-Leu) endoplasmic reticulum protein retention receptor 1	14.479	13.8028	1.59792	0.00177811	0.0385849
USP7	7874	ubiquitin specific peptidase 7 (herpes virus-associated)	8.70667	8.0306	1.59777	0.00670275	0.0860842
SAT2	112483	spermidine/spermine N1-acetyltransferase family member 2	5.53775	4.86181	1.59764	0.00469432	0.0697569
C2orf69	205327	chromosome 2 open reading frame 69	7.0945	6.41899	1.59717	0.631083	0.858832
LINC00602	441177	long intergenic non-protein coding RNA 602	3.7397	3.06448	1.59684	0.0475035	0.26327
TGFBR2	7048	transforming growth factor beta receptor II	12.6288	11.9541	1.59626	0.00302192	0.0540569
ZNF506		Transcript Identified by AceView, Entrez Gene ID(s) 284440; 440515	3.74083	3.06627	1.59611	0.0584948	0.295616
ORAOV1	220064	oral cancer overexpressed 1	6.81731	6.14276	1.5961	0.0719853	0.329761
ATXN7L3	56970	ataxin 7-like 3	7.65798	6.98347	1.59605	0.036716	0.229587
GFOD2	81577	glucose-fructose oxidoreductase domain containing 2	4.93798	4.26398	1.59549	0.03228	0.213165
HTR5A	3361	5-hydroxytryptamine (serotonin) receptor 5A, G protein-coupled	4.14312	3.46935	1.59523	0.0288531	0.199369
SGPL1	8879	sphingosine-1-phosphate lyase 1	10.2661	9.59295	1.59455	0.0159645	0.142895
LINC00663	284440	long intergenic non-protein coding RNA 663	4.61585	3.94274	1.59451	0.600915	0.845031
SLC25A6	293	solute carrier family 25 (mitochondrial carrier; adenine nucleotide translocator), member 6	15.2095	14.5369	1.59385	0.00959127	0.105559
TLX1	3195	T-cell leukemia homeobox 1	4.73995	4.06771	1.59355	0.0469313	0.261735
ZMIZ2	83637	zinc finger, MIZ-type containing 2	8.31674	7.64457	1.59348	0.022923	0.173825
C9orf9	11092	chromosome 9 open reading frame 9	4.92019	4.24802	1.59346	0.192111	0.524692
SAMM50	25813	SAMM50 sorting and assembly machinery component	10.0526	9.38065	1.59324	0.0174079	0.149945
OTUD6B		Transcript Identified by AceView, Entrez Gene ID(s) 51633	5.66404	4.99213	1.59318	0.0929778	0.37612
ZNF792	126375	zinc finger protein 792	7.31491	6.64333	1.59282	0.07809	0.344483
TP53I11	9537	tumor protein p53 inducible protein 11	12.9254	12.254	1.5927	0.0600242	0.299861
SURF1	6834	surfeit 1	6.85508	6.18362	1.59269	0.0136843	0.131144
LRPPRC	10128	leucine-rich pentatricopeptide repeat containing	12.1288	11.4574	1.59259	0.0721409	0.329888
MANEA	79694	mannosidase, endo-alpha	11.8602	11.189	1.59234	0.0142517	0.134184
ANO6	196527	anoctamin 6	12.9775	12.3063	1.59231	0.00459891	0.0688327
GMPR2	51292	guanosine monophosphate reductase 2	9.19045	8.51934	1.5923	0.00872225	0.0995688
TNFRSF11A	8792	tumor necrosis factor receptor superfamily, member 11a, NFKB activator	7.40877	6.73768	1.59228	0.0296773	0.202648
KDM6B	23135	lysine (K)-specific demethylase 6B	8.12133	7.45045	1.59204	0.0677705	0.319271
SYNE2	23224	spectrin repeat containing, nuclear envelope 2	7.75322	7.08236	1.59202	0.0127243	0.124986
DOCK10		Transcript Identified by AceView, Entrez Gene ID(s) 55619	4.87551	4.2047	1.59197	0.28559	0.627299
ZNF197	10168	zinc finger protein 197	4.94657	4.27684	1.59077	0.0474161	0.263057
OTUB2	78990	OTU deubiquitinase, ubiquitin aldehyde binding 2	7.03431	6.36461	1.59074	0.0611103	0.302841
CRYZ	1429	crystallin zeta	11.2859	10.6162	1.59074	0.0223428	0.170902
IYD	389434	iodotyrosine deiodinase	4.62515	3.95564	1.59054	0.406242	0.724892
PCED1A	64773	PC-esterase domain containing 1A	9.29173	8.62246	1.59028	0.00189393	0.0399088
ZMYM3	9203	zinc finger, MYM-type 3	8.59718	7.92796	1.59021	0.144341	0.460894
DYRK1B	9149	dual specificity tyrosine-(Y)-phosphorylation regulated kinase 1B	4.84525	4.17607	1.59016	0.333681	0.66875
AIF1	199	allograft inflammatory factor 1	3.22399	2.55486	1.59011	0.428854	0.740465
RGSL1	353299	regulator of G-protein signaling like 1	4.05936	3.39042	1.5899	0.11804	0.423486
LYRM1	57149	LYR motif containing 1	9.55053	8.8822	1.58923	0.0187346	0.155473
TTC39A	22996	tetratricopeptide repeat domain 39A	6.50312	5.83528	1.58869	0.185652	0.517462
ST6GALNAC2	10610	ST6 (alpha-N-acetyl-neuraminyl-2,3-beta-galactosyl-1,3)-N-acetylgalactosaminide alpha-2,6-sialyltransferase 2	6.48293	5.81555	1.58819	0.014199	0.133817
IRX5	10265	iroquois homeobox 5	4.26442	3.5971	1.58811	0.011959	0.120364
C5orf58	133874	chromosome 5 open reading frame 58	4.19123	3.52397	1.58805	0.0780856	0.344483
ENTPD6	955	ectonucleoside triphosphate diphosphohydrolase 6 (putative)	11.2397	10.5724	1.58803	0.0112965	0.11699
TAGLN3	29114	transgelin 3	4.63814	3.97093	1.588	0.0432473	0.249951
NOX3	50508	NADPH oxidase 3	3.51432	2.84713	1.58797	0.297267	0.638423
ADD1	118	adducin 1 (alpha)	11.6313	10.9647	1.58731	0.00350005	0.0593506
HPS6	79803	Hermansky-Pudlak syndrome 6	4.47588	3.80934	1.58726	0.0470068	0.261735
LIN54	132660	lin-54 DREAM MuvB core complex component	7.40547	6.73899	1.5872	0.330369	0.666267
SLC35D1	23169	solute carrier family 35 (UDP-GlcA/UDP-GalNAc transporter), member D1	7.34112	6.67489	1.58691	0.0814393	0.351465
MYO1F		Memczak2013 ANTISENSE, CDS, coding, INTERNAL best transcript NM_012335	6.20242	5.53627	1.58684	0.0157321	0.141889
EFR3B	22979	EFR3 homolog B	3.97952	3.31379	1.58637	0.212578	0.548265
PLD5	200150	phospholipase D family, member 5	4.1665	3.50081	1.58633	0.0836138	0.356672
SHANK2	22941	SH3 and multiple ankyrin repeat domains 2	6.03478	5.36911	1.58631	0.00177921	0.0385849
IKZF3	22806	IKAROS family zinc finger 3	5.78542	5.1203	1.5857	0.0493272	0.268657
TMEM135	65084	transmembrane protein 135	8.27395	7.60908	1.58543	0.0154551	0.140756
ABCA13		Memczak2013 ALT_ACCEPTOR, ALT_DONOR, coding, INTERNAL, intronic best transcript NM_152701	3.94058	3.27575	1.58539	0.385759	0.710476
RABEP1	9135	rabaptin, RAB GTPase binding effector protein 1	9.77828	9.11373	1.58508	0.0389302	0.236483
DIO1	1733	deiodinase, iodothyronine, type I	4.39251	3.72912	1.5838	0.188087	0.520865
ZHX3	23051	zinc fingers and homeoboxes 3	8.01276	7.34961	1.58353	0.0121122	0.121281
HNRNPU	3192	heterogeneous nuclear ribonucleoprotein U (scaffold attachment factor A)	16.0734	15.4103	1.58343	0.00355632	0.0598242
ACSF2	80221	acyl-CoA synthetase family member 2	9.01998	8.35693	1.58343	0.409382	0.727337
MED29	55588	mediator complex subunit 29	8.33515	7.67283	1.58263	0.00725731	0.0898181
CCDC70	83446	coiled-coil domain containing 70	3.82386	3.16171	1.58244	0.337325	0.671894
MMP8	4317	matrix metallopeptidase 8	3.79799	3.13587	1.58241	0.124107	0.431977
FMN1	342184	formin 1	5.94773	5.28567	1.58235	0.0565504	0.290096
CYB561D1	284613	cytochrome b561 family, member D1	5.16318	4.50113	1.58232	0.218728	0.556265
LMTK2	22853	lemur tyrosine kinase 2	11.2333	10.5713	1.58231	0.0184756	0.154725
APEH	327	acylaminoacyl-peptide hydrolase	10.7882	10.1264	1.5821	0.148334	0.467049
SURF1	6834	surfeit 1	5.30468	4.64288	1.58205	0.0322296	0.213165
EPAS1	2034	endothelial PAS domain protein 1	9.97168	9.31029	1.5816	0.011171	0.115914
C3orf62	375341	chromosome 3 open reading frame 62	5.80561	5.14423	1.5816	0.366457	0.695446
ZNF124	7678	zinc finger protein 124	7.95319	7.29203	1.58134	0.0200839	0.160851
CRTAP	10491	cartilage associated protein	10.4537	9.79262	1.58126	0.00773671	0.0928673
MLEC	9761	malectin	14.1519	13.4908	1.58126	0.0021909	0.0439574
EIF3F		Eukaryotic translation initiation factor 3 subunit F [Source:UniProtKB/Swiss-Prot;Acc:O00303]	5.29874	4.63767	1.58125	0.0426772	0.248333
FRYL	285527	FRY like transcription coactivator	9.3023	8.64144	1.58102	0.00397479	0.0634692
CEP68	23177	centrosomal protein 68kDa	8.29601	7.6352	1.58098	0.142207	0.457909
MYO9B	4650	myosin IXB	9.32684	8.66702	1.57989	0.00537126	0.0755224
DEFB121	245934	defensin, beta 121	4.28939	3.62959	1.57987	0.149028	0.467782
OR52H1	390067	olfactory receptor, family 52, subfamily H, member 1	3.95236	3.29267	1.57975	0.0703116	0.325402
TMEM261	90871	transmembrane protein 261	10.5945	9.93517	1.57933	0.00482507	0.0708337
ADAMTS13	11093	ADAM metallopeptidase with thrombospondin type 1 motif 13	6.03128	5.37197	1.57933	0.276387	0.616596
ZG16B	124220	zymogen granule protein 16B	7.37518	6.71591	1.57928	0.13114	0.443485
LRIG1			4.70478	4.04554	1.57925	0.026182	0.188314
KRTAP12-1	353332	keratin associated protein 12-1	5.99945	5.34059	1.57883	0.0180047	0.152533
PALM	5064	paralemmin	5.21572	4.5574	1.57825	0.166369	0.493241
DHX35		Memczak2013 ANTISENSE, coding, INTERNAL, intronic best transcript NM_021931	4.04108	3.38285	1.57814	0.088393	0.366561
RHOD	29984	ras homolog family member D	7.47394	6.81606	1.57777	0.398711	0.719405
NPRL3	8131	NPR3-like, GATOR1 complex subunit	8.54374	7.88595	1.57767	0.00189362	0.0399088
C14orf169	79697	chromosome 14 open reading frame 169	7.91465	7.25707	1.57744	0.154916	0.47663
PCBP2	5094	poly(rC) binding protein 2	16.3431	15.6855	1.57741	0.00334495	0.057562
TLE3	7090	transducin-like enhancer of split 3	8.37659	7.71961	1.57679	0.00920029	0.102969
CCDC9	26093	coiled-coil domain containing 9	7.35593	6.69902	1.57671	0.122263	0.429393
NDST2	8509	N-deacetylase/N-sulfotransferase (heparan glucosaminyl) 2	6.62134	5.96495	1.57613	0.142257	0.457991
FNIP2	57600	folliculin interacting protein 2	8.90081	8.24453	1.57601	0.00126432	0.0311448
GLP1R	2740	glucagon-like peptide 1 receptor	5.28567	4.62948	1.57592	0.197882	0.530929
REEP3	221035	receptor accessory protein 3	9.73393	9.07798	1.57566	0.0613646	0.30333
ECSIT	51295	ECSIT signalling integrator	7.47656	6.82078	1.57546	0.0188873	0.155926
CNOT6	57472	CCR4-NOT transcription complex subunit 6	10.4993	9.84359	1.57543	0.0114225	0.117868
EEF2	1938	eukaryotic translation elongation factor 2	17.0522	16.3966	1.57533	0.00474273	0.0701531
ARPC1B	10095	actin related protein 2/3 complex subunit 1B	12.0473	11.3917	1.57526	0.0182667	0.153933
HECTD4	283450	HECT domain containing E3 ubiquitin protein ligase 4	9.41537	8.75991	1.57513	0.0250618	0.183832
CCDC120	90060	coiled-coil domain containing 120	6.83312	6.17767	1.57511	0.190123	0.522545
LRFN4	78999	leucine rich repeat and fibronectin type III domain containing 4	6.82061	6.16529	1.57496	0.0757573	0.338438
UBQLN2	29978	ubiquilin 2	9.19828	8.54316	1.57475	0.00388349	0.0628673
PIK3R1	5295	phosphoinositide-3-kinase, regulatory subunit 1 (alpha)	11.4183	10.7633	1.57464	0.00639348	0.0835391
RBM10	8241	RNA binding motif protein 10	8.00271	7.34786	1.57445	0.00539281	0.075697
PIGN	23556	phosphatidylinositol glycan anchor biosynthesis class N	8.30503	7.65027	1.57436	0.0314849	0.210334
OR2M4	26245	olfactory receptor, family 2, subfamily M, member 4	4.05877	3.4041	1.57425	0.666546	0.875181
ZNF787	126208	zinc finger protein 787	8.18472	7.5309	1.57333	0.0404714	0.240224
MTFR1	9650	mitochondrial fission regulator 1	6.5187	5.86493	1.57328	0.240086	0.58108
CEP70	80321	centrosomal protein 70kDa	8.0893	7.43571	1.57308	0.0181384	0.153163
ABCC4	10257	ATP binding cassette subfamily C member 4	10.0511	9.39774	1.57286	0.00635841	0.0833947
CSRP1	1465	cysteine and glycine-rich protein 1	13.5299	12.8765	1.57286	0.0149248	0.137978
CBLN2	147381	cerebellin 2 precursor	3.58705	2.93381	1.57269	0.0488231	0.267054
BRAT1	221927	BRCA1-associated ATM activator 1	5.7199	5.06667	1.57269	0.0364858	0.228512
SHB	6461	Src homology 2 domain containing adaptor protein B	8.84644	8.19337	1.57251	0.005746	0.0789495
ZC3H13		Memczak2013 ANTISENSE, CDS, coding, INTERNAL best transcript NM_015070	5.05094	4.3979	1.57248	0.0554837	0.287692
PPM1F	9647	protein phosphatase, Mg2+/Mn2+ dependent, 1F	5.10721	4.45483	1.57176	0.0053432	0.0753459
ABCD1	215	ATP binding cassette subfamily D member 1	7.31688	6.66471	1.57154	0.0738109	0.333846
PPP1R9A	55607	protein phosphatase 1, regulatory subunit 9A	6.68505	6.03299	1.57141	0.0218271	0.168913
PPA2	27068	pyrophosphatase (inorganic) 2	7.40343	6.75149	1.57129	0.173364	0.501524
RFTN2	130132	raftlin family member 2	3.42739	2.77562	1.57109	0.0418997	0.245553
NCOA5	57727	nuclear receptor coactivator 5	9.46045	8.80945	1.57026	0.0061213	0.0820092
FAM110A	83541	family with sequence similarity 110, member A	8.46523	7.81442	1.57005	0.00389579	0.0629479
HDAC4	9759	histone deacetylase 4	8.65239	8.00177	1.56984	0.0130401	0.127129
FGD3	89846	FYVE, RhoGEF and PH domain containing 3	7.40517	6.75481	1.56957	0.0567769	0.290563
ST20-AS1	283687	ST20 antisense RNA 1	3.42385	2.77351	1.56954	0.0310942	0.209184
DENND2A	27147	DENN/MADD domain containing 2A	6.3342	5.684	1.56939	0.243052	0.583716
PTPRA	5786	protein tyrosine phosphatase, receptor type, A	12.4954	11.8453	1.56929	0.0190103	0.156525
FAM217B	63939	family with sequence similarity 217, member B	8.70613	8.05655	1.56871	0.00372496	0.0613146
MCM3AP-AS1	114044	MCM3AP antisense RNA 1	6.71176	6.06219	1.56869	0.00271952	0.0505069
RPS9	6203	ribosomal protein S9	15.4027	14.7532	1.56869	0.106497	0.40368
PPP1R2	5504	protein phosphatase 1, regulatory (inhibitor) subunit 2	9.79983	9.15095	1.56795	0.108051	0.406708
GPR137C	283554	G protein-coupled receptor 137C	7.14003	6.49148	1.56759	0.358644	0.688826
SCAP	22937	SREBF chaperone	9.44501	8.79649	1.56755	0.00245193	0.0472923
LEMD2	221496	LEM domain containing 2	7.92492	7.27649	1.56746	0.0238326	0.178728
STAP1	26228	signal transducing adaptor family member 1	4.22901	3.58094	1.56707	0.317791	0.655321
ATF4	468	activating transcription factor 4	13.5077	12.8598	1.56688	0.00379958	0.0620665
ZNF195	7748	zinc finger protein 195	11.1313	10.4839	1.56631	0.0272638	0.193307
CDH26	60437	cadherin 26	5.39882	4.75151	1.56624	0.160815	0.484502
ID2	3398	inhibitor of DNA binding 2, dominant negative helix-loop-helix protein	10.9296	10.2824	1.56607	0.010886	0.114285
FMN1	342184	formin 1	4.73971	4.09265	1.56597	0.0704141	0.325553
PNPLA3	80339	patatin-like phospholipase domain containing 3	4.34481	3.69786	1.56585	0.56725	0.826745
RNF214	257160	ring finger protein 214	8.32087	7.67398	1.56579	0.0228802	0.173589
ENDOG	2021	endonuclease G	4.90014	4.25368	1.56532	0.0353265	0.224474
ETFA	2108	electron-transfer-flavoprotein, alpha polypeptide	12.5545	11.908	1.56529	0.127341	0.437055
HGH1	51236	HGH1 homolog	7.59661	6.9502	1.56527	0.0136423	0.130975
ALK		Transcript Identified by AceView, Entrez Gene ID(s) 238	3.53	2.8842	1.5646	0.577606	0.832839
ACSL3	2181	acyl-CoA synthetase long-chain family member 3	13.5694	12.9237	1.56449	0.00442613	0.0671844
REST	5978	RE1-silencing transcription factor	10.1075	9.46213	1.56408	0.0105328	0.112056
PPP6R1	22870	protein phosphatase 6, regulatory subunit 1	9.83765	9.19249	1.56391	0.0226052	0.172169
HTR1F	3355	5-hydroxytryptamine (serotonin) receptor 1F, G protein-coupled	3.93716	3.29204	1.56386	0.0354655	0.224782
CMC1	152100	C-x(9)-C motif containing 1	6.82079	6.17592	1.5636	0.0159658	0.142895
DOCK1	1793	dedicator of cytokinesis 1	8.30458	7.65972	1.56358	0.0938922	0.378178
RPGRIP1L	23322	RPGRIP1-like	8.88608	8.24137	1.56343	0.015539	0.141062
RGS6	9628	regulator of G-protein signaling 6	4.3167	3.67218	1.56322	0.866429	0.956761
SCML4	256380	sex comb on midleg-like 4 (Drosophila)	3.53633	2.89193	1.56309	0.0161589	0.143927
SCRT1	83482	scratch family zinc finger 1	3.48769	2.84345	1.56292	0.11545	0.419994
AVIL	10677	advillin	5.18256	4.53841	1.56282	0.0525172	0.27874
TRAF7	84231	TNF receptor-associated factor 7, E3 ubiquitin protein ligase	11.2856	10.6415	1.56278	0.00458913	0.0687824
LY9	4063	lymphocyte antigen 9	3.81422	3.17027	1.5626	0.0328592	0.215313
TGM1	7051	transglutaminase 1	4.77077	4.12728	1.56211	0.439634	0.748889
VAV2	7410	vav 2 guanine nucleotide exchange factor	8.56848	7.92511	1.56197	0.0220146	0.169723
HDAC10	83933	histone deacetylase 10	4.22836	3.58521	1.56175	0.0704789	0.325712
TCEB3C	162699	transcription elongation factor B polypeptide 3C (elongin A3)	5.49026	4.84713	1.56171	0.246423	0.5858
SYT13	57586	synaptotagmin XIII	3.51369	2.87057	1.5617	0.290926	0.632196
ZNF718	255403	zinc finger protein 718	5.52869	4.88564	1.56163	0.240527	0.581406
HEBP2	23593	heme binding protein 2	11.0509	10.4082	1.56126	0.0124946	0.124009
SLC4A5	57835	solute carrier family 4 (sodium bicarbonate cotransporter), member 5	4.56343	3.9212	1.56074	0.258911	0.597689
STAP2	55620	signal transducing adaptor family member 2	7.76493	7.1227	1.56074	0.00556107	0.077199
SCN1A	6323	sodium channel, voltage gated, type I alpha subunit	3.67146	3.02939	1.56056	0.392904	0.715487
CES4A	283848	carboxylesterase 4A	4.6352	3.99315	1.56054	0.196545	0.52913
DNAJB11	51726	DnaJ (Hsp40) homolog, subfamily B, member 11	7.7917	7.15005	1.56011	0.0269079	0.191667
ZNF641	121274	zinc finger protein 641	6.64874	6.00709	1.5601	0.18563	0.517462
MCOLN2	255231	mucolipin 2	2.88099	2.23974	1.55968	0.0596459	0.298968
MRPS9	64965	mitochondrial ribosomal protein S9	9.33543	8.69477	1.55904	0.00416136	0.0647229
EEPD1	80820	endonuclease/exonuclease/phosphatase family domain containing 1	7.62392	6.9833	1.559	0.00458397	0.0687532
PDZD8	118987	PDZ domain containing 8	14.1763	13.5358	1.55883	0.00855366	0.0983693
ARHGEF26	26084	Rho guanine nucleotide exchange factor 26	6.75755	6.1173	1.55859	0.00696959	0.0879981
MBIP	51562	MAP3K12 binding inhibitory protein 1	9.70041	9.06029	1.55847	0.0564075	0.289818
GPAT4	137964	glycerol-3-phosphate acyltransferase 4	9.76797	9.12793	1.55838	0.00544915	0.0762988
STX19	415117	syntaxin 19	6.56609	5.92605	1.55837	0.0742919	0.335051
ZNF689	115509	zinc finger protein 689	5.65134	5.01133	1.55835	0.0664925	0.316145
ZNF316	100131017	zinc finger protein 316	8.50466	7.86496	1.558	0.00435833	0.06675
CEP290	80184	centrosomal protein 290kDa	8.57312	7.9336	1.55781	0.00966732	0.105896
METTL10	399818	methyltransferase like 10	8.74181	8.10287	1.55718	0.00668176	0.0860174
DYRK1B	9149	dual specificity tyrosine-(Y)-phosphorylation regulated kinase 1B	7.31891	6.68057	1.55654	0.00315097	0.0552487
BBS10	79738	Bardet-Biedl syndrome 10	8.3813	7.74317	1.55632	0.216229	0.552839
USP44	84101	ubiquitin specific peptidase 44	3.24153	2.60371	1.55598	0.0126076	0.124572
STK3	6788	serine/threonine kinase 3	11.5084	10.8707	1.55582	0.0407946	0.241702
CC2D1B	200014	coiled-coil and C2 domain containing 1B	6.15127	5.51371	1.55569	0.0155185	0.141062
HUWE1	10075	HECT, UBA and WWE domain containing 1, E3 ubiquitin protein ligase	12.1338	11.4963	1.55563	0.00503295	0.0726424
GRINA	2907	glutamate receptor, ionotropic, N-methyl D-aspartate-associated protein 1 (glutamate binding)	9.70749	9.0703	1.5553	0.00198856	0.0411017
ZNF480	147657	zinc finger protein 480	7.22516	6.58798	1.55529	0.0161467	0.143878
OR6F1	343169	olfactory receptor, family 6, subfamily F, member 1	4.53435	3.89751	1.55492	0.186079	0.517972
PCSK4	54760	proprotein convertase subtilisin/kexin type 4	6.987	6.35067	1.55436	0.00271601	0.0505069
ZNF30	90075	zinc finger protein 30	5.41943	4.78315	1.55432	0.291185	0.632312
GNPTG	84572	N-acetylglucosamine-1-phosphate transferase, gamma subunit	6.97274	6.33679	1.55395	0.104564	0.39941
VPS72	6944	vacuolar protein sorting 72 homolog (S. cerevisiae)	9.28431	8.64858	1.55372	0.044601	0.254551
GSTK1	373156	glutathione S-transferase kappa 1	12.9585	12.3231	1.55339	0.124434	0.432894
CXCL17	284340	chemokine (C-X-C motif) ligand 17	7.01298	6.37769	1.55325	0.00798088	0.0944247
CSNK1G2	1455	casein kinase 1, gamma 2	7.0549	6.41965	1.55321	0.0210794	0.165306
ZNF76	7629	zinc finger protein 76	7.17094	6.53585	1.55303	0.00216402	0.0436221
NCBP3	55421	nuclear cap binding subunit 3	8.26899	7.63404	1.55288	0.0288075	0.199118
SERP1	27230	stress-associated endoplasmic reticulum protein 1	5.9307	5.29578	1.55285	0.0862061	0.36243
PHF12	57649	PHD finger protein 12	8.80358	8.16895	1.55254	0.057187	0.291839
ACTN4	81	actinin, alpha 4	14.9584	14.3239	1.55244	0.0221171	0.170242
SLC35A4	113829	solute carrier family 35, member A4	11.7353	11.1015	1.55161	0.00626695	0.0829202
PRKAR1B	5575	protein kinase, cAMP-dependent, regulatory, type I, beta	6.48482	5.85117	1.55148	0.0268633	0.191544
BCHE	590	butyrylcholinesterase	3.1866	2.55301	1.55142	0.103503	0.397839
RAB15	376267	RAB15, member RAS oncogene family	11.0417	10.4084	1.55114	0.00799059	0.0944247
SLC2A4RG	56731	SLC2A4 regulator	7.40829	6.77501	1.55109	0.473032	0.768664
NTSR1	4923	neurotensin receptor 1 (high affinity)	13.7214	13.0881	1.55105	0.00659188	0.0851703
KRTAP21-3	100288323	keratin associated protein 21-3	4.2425	3.60974	1.55053	0.173259	0.501524
GAB1	2549	GRB2-associated binding protein 1	10.4284	9.79571	1.55048	0.00174897	0.0383166
C18orf63	644041	chromosome 18 open reading frame 63	3.73656	3.10395	1.55037	0.0788168	0.346108
IDNK	414328	idnK, gluconokinase homolog (E. coli)	6.88332	6.25071	1.55036	0.00409949	0.0643674
MS4A15	219995	membrane-spanning 4-domains, subfamily A, member 15	4.34736	3.71487	1.55024	0.00410456	0.0643998
REPIN1	29803	replication initiator 1	6.57048	5.93833	1.54987	0.0390631	0.236607
CHRNA5	1138	cholinergic receptor, nicotinic alpha 5	10.4476	9.8155	1.54979	0.00507343	0.0728346
FDXR	2232	ferredoxin reductase	6.83295	6.20115	1.5495	0.00460949	0.068943
RNF115	27246	ring finger protein 115	9.08479	8.45312	1.54936	0.0195655	0.158415
SKIV2L	6499	SKI2 homolog, superkiller viralicidic activity 2-like	6.49685	5.8652	1.54933	0.031745	0.211308
AXIN2	8313	axin 2	9.06734	8.43574	1.54928	0.0036583	0.0608241
ATMIN	23300	ATM interactor	11.0188	10.3872	1.54923	0.0761061	0.339219
CCRL2	9034	chemokine (C-C motif) receptor-like 2	8.38967	7.75844	1.54889	0.230487	0.570134
MAPT	4137	microtubule associated protein tau	6.51037	5.87923	1.54879	0.166543	0.493371
ZNF470	388566	zinc finger protein 470	4.58183	3.95125	1.54818	0.357731	0.68811
NANOGNB	360030	NANOG neighbor homeobox	4.74436	4.11381	1.54816	0.10951	0.409414
TRPV3	162514	transient receptor potential cation channel, subfamily V, member 3	4.15117	3.5207	1.54807	0.386922	0.711418
GYPE	2996	glycophorin E (MNS blood group)	4.22215	3.59209	1.54764	0.139367	0.454829
CNOT3	4849	CCR4-NOT transcription complex subunit 3	8.22494	7.59488	1.54763	0.036898	0.230283
GYLTL1B	120071	glycosyltransferase-like 1B	7.94189	7.31198	1.54747	0.0247608	0.18306
SLC25A6	293	solute carrier family 25 (mitochondrial carrier; adenine nucleotide translocator), member 6	15.1695	14.5396	1.54741	0.0214228	0.166961
SH3BGRL2		Transcript Identified by AceView, Entrez Gene ID(s) 83699	3.28074	2.65117	1.5471	0.207967	0.543068
KCNAB2	8514	potassium channel, voltage gated subfamily A regulatory beta subunit 2	7.60057	6.97118	1.54691	0.0286765	0.198646
C3orf33	285315	chromosome 3 open reading frame 33	5.24454	4.61527	1.54678	0.198756	0.531726
HBM	3042	hemoglobin, mu	3.49792	2.86868	1.54676	0.0594812	0.298282
LSM14A	26065	LSM14A mRNA processing body assembly factor	10.7347	10.1057	1.54653	0.0172446	0.149286
ZNF275	10838	zinc finger protein 275	6.68976	6.06125	1.54597	0.0152023	0.139355
CCDC88C	440193	coiled-coil domain containing 88C	8.5715	7.94329	1.54565	0.0119058	0.120111
NDUFA4	4697	NDUFA4, mitochondrial complex associated	14.2894	13.6612	1.54562	0.0362734	0.228139
SEPN1	57190	selenoprotein N, 1	4.47764	3.84955	1.54553	0.166264	0.493149
NAT14	57106	N-acetyltransferase 14 (GCN5-related, putative)	8.45281	7.82513	1.54508	0.175759	0.505011
FMN1	342184	formin 1	6.28899	5.66138	1.54501	0.302304	0.641912
FNBP1	23048	formin binding protein 1	5.00317	4.37608	1.54445	0.502197	0.788054
SMARCC2	6601	SWI/SNF related, matrix associated, actin dependent regulator of chromatin, subfamily c, member 2	13.7869	13.1598	1.54443	0.00285141	0.0518279
RRAGB	10325	Ras-related GTP binding B	7.38975	6.7628	1.5443	0.206438	0.541148
NBPF19	101060226	neuroblastoma breakpoint family, member 19	8.27351	7.64675	1.5441	0.0757208	0.338346
IKZF4	64375	IKAROS family zinc finger 4	5.4715	4.84529	1.54351	0.0210688	0.165283
ZNF780A	284323	zinc finger protein 780A	8.67749	8.05136	1.54342	0.00975644	0.106438
CERK	64781	ceramide kinase	8.03194	7.40584	1.54339	0.0114318	0.117868
LRIG2	9860	leucine-rich repeats and immunoglobulin-like domains 2	7.44352	6.81749	1.54332	0.0958858	0.381551
SERPINB10	5273	serpin peptidase inhibitor, clade B (ovalbumin), member 10	4.01717	3.39116	1.54329	0.426681	0.738967
TAS2R38	5726	taste receptor, type 2, member 38	3.90227	3.2763	1.54325	0.124977	0.434077
TLE6	79816	transducin-like enhancer of split 6	4.77851	4.15287	1.5429	0.0115823	0.118519
MMP17	4326	matrix metallopeptidase 17 (membrane-inserted)	3.83547	3.20984	1.54288	0.00522669	0.074289
TYMSOS	494514	TYMS opposite strand	4.68844	4.06282	1.54287	0.0402275	0.240224
RP11-875O11.1			4.99668	4.37115	1.54278	0.169149	0.496812
CYTH4	27128	cytohesin 4	5.33378	4.70826	1.54278	0.29987	0.640301
TRIM69	140691	tripartite motif containing 69	3.26406	2.63857	1.54274	0.177242	0.50705
PLA2G7	7941	phospholipase A2, group VII (platelet-activating factor acetylhydrolase, plasma)	3.81277	3.18732	1.54269	0.0332716	0.216968
ESRP2	80004	epithelial splicing regulatory protein 2	9.93746	9.31202	1.54269	0.0234609	0.176868
SRGN		Memczak2013 ANTISENSE, coding, INTERNAL, UTR3 best transcript NM_002727	4.28366	3.65823	1.54266	0.00308096	0.0547216
ARHGAP10		Transcript Identified by AceView, Entrez Gene ID(s) 79658	4.87465	4.24925	1.54264	0.317111	0.654988
CPSF7	79869	cleavage and polyadenylation specific factor 7	10.5269	9.9017	1.54248	0.0491054	0.267856
EXOC3-AS1	116349	EXOC3 antisense RNA 1	5.7207	5.09561	1.54231	0.0381233	0.233887
DRAP1	10589	DR1-associated protein 1 (negative cofactor 2 alpha)	9.25511	8.63002	1.5423	0.0129888	0.126745
HRG	3273	histidine-rich glycoprotein	4.66821	4.04316	1.54227	0.225013	0.564188
USF3	205717	upstream transcription factor family member 3	10.5956	9.97092	1.5419	0.00692825	0.0877715
ERGIC1		Memczak2013 ALT_ACCEPTOR, ALT_DONOR, coding, INTERNAL, intronic best transcript NM_001031711	5.95753	5.33298	1.54172	0.148749	0.467782
SOCS5	9655	suppressor of cytokine signaling 5	8.47889	7.85488	1.54115	0.319117	0.65679
TBL1Y	90665	transducin (beta)-like 1, Y-linked	4.66517	4.04148	1.54082	0.202677	0.53627
ADCY10	55811	adenylate cyclase 10 (soluble)	4.03064	3.40703	1.54072	0.0155974	0.141154
PTCD1	26024	pentatricopeptide repeat domain 1	4.99587	4.37243	1.54054	0.202597	0.536178
C1orf116	79098	chromosome 1 open reading frame 116	10.3419	9.71874	1.54027	0.0205585	0.162628
ATHL1	80162	ATH1, acid trehalase-like 1 (yeast)	8.79194	8.16884	1.54018	0.0248946	0.183189
EP400	57634	E1A binding protein p400	8.81369	8.19083	1.53993	0.0920125	0.373907
ZNF286B	729288	zinc finger protein 286B	6.18095	5.5582	1.53981	0.0700718	0.325022
KCNAB3	9196	potassium channel, voltage gated subfamily A regulatory beta subunit 3	3.88203	3.25939	1.53969	0.0445254	0.25439
CAV3	859	caveolin 3	4.67462	4.05201	1.53965	0.351395	0.682859
ABCC1		Jeck2013 ALT_ACCEPTOR, ALT_DONOR, coding, INTERNAL, intronic best transcript NM_004996	4.94206	4.32013	1.53893	0.787265	0.926743
METTL14	57721	methyltransferase like 14	9.46047	8.83867	1.53879	0.0385192	0.235408
F3	2152	coagulation factor III (thromboplastin, tissue factor)	4.96504	4.34343	1.53859	0.00629719	0.0830195
MLLT11	10962	myeloid/lymphoid or mixed-lineage leukemia; translocated to, 11	6.49083	5.86937	1.53843	0.245937	0.585443
FAM168A	23201	family with sequence similarity 168, member A	6.3541	5.73295	1.53809	0.00600028	0.0813489
DLG5	9231	discs, large homolog 5 (Drosophila)	7.28388	6.66277	1.53806	0.00788404	0.0937344
FGFR3	2261	fibroblast growth factor receptor 3	5.82357	5.20246	1.53806	0.0312784	0.209643
CDC42BPA	8476	CDC42 binding protein kinase alpha (DMPK-like)	9.56649	8.94547	1.53796	0.0998021	0.390541
ERMAP	114625	erythroblast membrane-associated protein (Scianna blood group)	8.05497	7.43416	1.53774	0.0871742	0.364182
CXorf57	55086	chromosome X open reading frame 57	3.79898	3.17836	1.53754	0.0397047	0.23854
HERC6		Memczak2013 ANTISENSE, coding, INTERNAL, intronic best transcript NM_001165136	3.50499	2.88465	1.53724	0.125628	0.435134
PPIC	5480	peptidylprolyl isomerase C (cyclophilin C)	10.7804	10.1602	1.53706	0.173503	0.501819
RFXANK	8625	regulatory factor X-associated ankyrin-containing protein	10.564	9.94391	1.53702	0.00715027	0.0891104
ZACN	353174	zinc activated ligand-gated ion channel	3.57452	2.95453	1.53686	0.035594	0.225198
TM7SF2	7108	transmembrane 7 superfamily member 2	11.7809	11.161	1.53676	0.00311277	0.0550393
TMSB4X	7114	thymosin beta 4, X-linked	14.9793	14.3595	1.5367	0.00557462	0.0772381
C9orf50	375759	chromosome 9 open reading frame 50	5.18538	4.56571	1.53652	0.112946	0.415907
CAMK2D	817	calcium/calmodulin-dependent protein kinase II delta	13.2767	12.6571	1.53646	0.00408668	0.0643017
KAT2B	8850	K(lysine) acetyltransferase 2B	5.21983	4.60083	1.53581	0.0110911	0.115589
RGS13	6003	regulator of G-protein signaling 13	4.62639	4.00746	1.53574	0.0742946	0.335051
HMG20A	10363	high mobility group 20A	9.99209	9.37316	1.53574	0.197251	0.530155
C19orf67	646457	chromosome 19 open reading frame 67	4.93049	4.31163	1.53566	0.155523	0.477614
VWC2L	402117	von Willebrand factor C domain containing protein 2-like	3.51069	2.8925	1.53494	0.0386871	0.236134
KIAA1462	57608	KIAA1462	4.77475	4.15659	1.53491	0.0371379	0.230612
PHC1	1911	polyhomeotic homolog 1 (Drosophila)	5.29277	4.67467	1.53485	0.0154804	0.140867
DOCK4	9732	dedicator of cytokinesis 4	6.83217	6.21411	1.5348	0.0183938	0.154588
TMEM42	131616	transmembrane protein 42	5.14393	4.52598	1.53469	0.0394845	0.237816
FGF21	26291	fibroblast growth factor 21	3.76143	3.14375	1.5344	0.00753261	0.0916909
RPRML	388394	reprimo-like	5.12913	4.5116	1.53425	0.0474224	0.263057
SLC17A7	57030	solute carrier family 17 (vesicular glutamate transporter), member 7	4.84851	4.23136	1.53385	0.0510983	0.274401
LRP6	4040	LDL receptor related protein 6	7.9949	7.37779	1.53381	0.00797949	0.0944247
ARL6IP4	51329	ADP-ribosylation factor like GTPase 6 interacting protein 4	10.174	9.55697	1.53373	0.00397538	0.0634692
ATP6V1F	9296	ATPase, H+ transporting, lysosomal 14kDa, V1 subunit F	13.3141	12.6974	1.53339	0.105112	0.400649
SNX30	401548	sorting nexin family member 30	6.40048	5.78387	1.53327	0.0166239	0.145993
ABCA1	19	ATP binding cassette subfamily A member 1	5.82087	5.20428	1.53325	0.0200468	0.160734
RNF125	54941	ring finger protein 125, E3 ubiquitin protein ligase	5.68506	5.06853	1.53319	0.0147845	0.137332
SNRPE	6635	small nuclear ribonucleoprotein polypeptide E	12.2319	11.6157	1.53284	0.297333	0.638423
C4orf36	132989	chromosome 4 open reading frame 36	5.24024	4.62426	1.5326	0.0324531	0.213448
FNBP1L	54874	formin binding protein 1-like	12.4342	11.8183	1.53252	0.00499713	0.0724179
PXN	5829	paxillin	10.376	9.76014	1.53246	0.0117845	0.119619
PSMB5	5693	proteasome subunit beta 5	10.6572	10.0417	1.53204	0.391988	0.714912
PRAMEF25	441873	PRAME family member 25	4.34753	3.73227	1.53184	0.0190459	0.156572
TRAPPC13	80006	trafficking protein particle complex 13	5.87843	5.26345	1.53154	0.0159647	0.142895
RAD51B		Jeck2013 ALT_ACCEPTOR, ALT_DONOR, coding, INTERNAL, intronic best transcript NM_133509	8.55586	7.94148	1.5309	0.0371887	0.230727
STARD6	147323	StAR-related lipid transfer domain containing 6	4.23922	3.62535	1.53036	0.249601	0.588258
MAP2K6	5608	mitogen-activated protein kinase kinase 6	6.65091	6.03719	1.53019	0.0661885	0.315399
NQO1	1728	NAD(P)H dehydrogenase, quinone 1	15.1866	14.5729	1.53016	0.101472	0.393842
SLPI	6590	secretory leukocyte peptidase inhibitor	5.6257	5.01231	1.52985	0.010126	0.109522
SEMA3C	10512	sema domain, immunoglobulin domain (Ig), short basic domain, secreted, (semaphorin) 3C	12.255	11.6419	1.52953	0.0437074	0.251386
SYDE2	84144	synapse defective 1, Rho GTPase, homolog 2 (C. elegans)	7.84631	7.23324	1.52951	0.0158107	0.142124
TEF	7008	thyrotrophic embryonic factor	5.29644	4.68359	1.52928	0.343452	0.677179
MSMO1	6307	methylsterol monooxygenase 1	16.3003	15.6876	1.52909	0.131197	0.443485
LEO1	123169	LEO1 homolog, Paf1/RNA polymerase II complex component	10.5232	9.91063	1.52898	0.0100101	0.108598
SIGLEC6	946	sialic acid binding Ig-like lectin 6	4.62407	4.01222	1.52822	0.400918	0.721263
UBE2G1	7326	ubiquitin conjugating enzyme E2G 1	11.5881	10.9765	1.52792	0.0109397	0.114533
KLHL2	11275	kelch-like family member 2	8.71371	8.10225	1.5278	0.190985	0.523215
TMEM255B	348013	transmembrane protein 255B	4.00505	3.39361	1.52779	0.0652281	0.312752
CYP4V2	285440	cytochrome P450, family 4, subfamily V, polypeptide 2	5.22475	4.6141	1.52695	0.0139673	0.132612
SIRT1	23411	sirtuin 1	9.77702	9.16651	1.5268	0.0719526	0.329682
NIPSNAP3A	25934	nipsnap homolog 3A (C. elegans)	5.77448	5.16435	1.52639	0.183643	0.515055
CTDSP2	10106	CTD small phosphatase 2	10.6058	9.99571	1.52633	0.0930023	0.376148
FGF17	8822	fibroblast growth factor 17	5.14975	4.53973	1.52628	0.0187061	0.155446
PRSS8	5652	protease, serine, 8	14.148	13.5383	1.52603	0.068226	0.32034
AKIRIN1	79647	akirin 1	10.2505	9.64117	1.52557	0.020281	0.161525
LYSMD4	145748	LysM, putative peptidoglycan-binding, domain containing 4	7.62003	7.01119	1.52504	0.00655375	0.0848763
MRPS30	10884	mitochondrial ribosomal protein S30	13.4168	12.8087	1.52434	0.0241096	0.179987
TMEM259	91304	transmembrane protein 259	9.77333	9.1652	1.52429	0.0139236	0.132256
SLC25A26	115286	solute carrier family 25 (S-adenosylmethionine carrier), member 26	4.04335	3.43529	1.52421	0.322424	0.659735
DEFB123	245936	defensin, beta 123	5.298	4.69013	1.524	0.314103	0.652332
CTSA	5476	cathepsin A	13.798	13.1903	1.52382	0.00179222	0.0388279
OSBPL5	114879	oxysterol binding protein-like 5	6.94469	6.33711	1.52369	0.0118706	0.119868
STRBP	55342	spermatid perinuclear RNA binding protein	7.9428	7.33537	1.52354	0.029036	0.200181
WASF2	10163	WAS protein family, member 2	11.4956	10.8882	1.52347	0.00529989	0.0748335
STX3	6809	syntaxin 3	11.9042	11.2968	1.52347	0.0322506	0.213165
OR10AC1		olfactory receptor, family 10, subfamily AC, member 1 (gene/pseudogene) [Source:HGNC Symbol;Acc:HGNC:14758]	5.27447	4.66715	1.52343	0.0205841	0.16273
RMDN2	151393	regulator of microtubule dynamics 2	5.48822	4.88096	1.52337	0.0223954	0.171182
SMOC2	64094	SPARC related modular calcium binding 2	4.85644	4.24932	1.52322	0.159552	0.482615
GPR143	4935	G protein-coupled receptor 143	5.73146	5.12442	1.52313	0.202422	0.535927
ZNF211	10520	zinc finger protein 211	6.16763	5.56097	1.52274	0.0359108	0.226667
CDH23	64072	cadherin-related 23	4.89619	4.28979	1.52245	0.0986974	0.388059
NUTM1	256646	NUT midline carcinoma, family member 1	5.52272	4.91642	1.52234	0.150823	0.471415
MGST2	4258	microsomal glutathione S-transferase 2	9.91032	9.30403	1.52234	0.00697065	0.0879981
SCN3A	6328	sodium channel, voltage gated, type III alpha subunit	3.10277	2.49657	1.52224	0.0809565	0.350567
SCAI	286205	suppressor of cancer cell invasion	8.14984	7.54366	1.52222	0.0630335	0.307905
LAMTOR1	55004	late endosomal/lysosomal adaptor, MAPK and MTOR activator 1	8.18728	7.58112	1.52221	0.122261	0.429393
ATXN2L	11273	ataxin 2-like	12.9212	12.3153	1.52189	0.00432025	0.066452
GFPT2	9945	glutamine-fructose-6-phosphate transaminase 2	4.42953	3.82387	1.52167	0.608003	0.847633
DNAJC22	79962	DnaJ (Hsp40) homolog, subfamily C, member 22	7.35069	6.74591	1.52075	0.0459701	0.258996
STAT6	6778	signal transducer and activator of transcription 6, interleukin-4 induced	9.86037	9.25614	1.52017	0.00513147	0.0733243
BDH1	622	3-hydroxybutyrate dehydrogenase, type 1	8.82075	8.21689	1.51978	0.01806	0.152801
EMC10	284361	ER membrane protein complex subunit 10	12.0894	11.4856	1.51973	0.101993	0.395079
TCF3	6929	transcription factor 3	10.843	10.2393	1.51964	0.00376172	0.0615889
PRPF38B	55119	pre-mRNA processing factor 38B	8.80182	8.19836	1.51936	0.122756	0.430026
EPRS	2058	glutamyl-prolyl-tRNA synthetase	13.0168	12.4134	1.51929	0.069999	0.324952
GFOD1	54438	glucose-fructose oxidoreductase domain containing 1	5.11211	4.5088	1.5192	0.0124453	0.123806
HDDC2	51020	HD domain containing 2	9.40957	8.80667	1.51877	0.408138	0.72621
SLC7A1	6541	solute carrier family 7 (cationic amino acid transporter, y+ system), member 1	14.7701	14.1674	1.51857	0.00373071	0.0613621
MYH11	4629	myosin, heavy chain 11, smooth muscle	4.76438	4.16195	1.51827	0.0716945	0.32928
SLAIN2	57606	SLAIN motif family member 2	13.4723	12.8699	1.51826	0.00798012	0.0944247
FBXO31		Memczak2013 ANTISENSE, INTERNAL, intronic, ncRNA best transcript NR_024568	3.97699	3.3746	1.51823	0.607044	0.847161
CACFD1	11094	calcium channel flower domain containing 1	7.60816	7.00583	1.51817	0.0225648	0.171989
BAIAP2	10458	BAI1-associated protein 2	9.74793	9.14575	1.51801	0.13767	0.451767
PCSK9	255738	proprotein convertase subtilisin/kexin type 9	5.28132	4.67925	1.51789	0.28817	0.629259
ERAP2	64167	endoplasmic reticulum aminopeptidase 2	10.9113	10.3093	1.51784	0.0115141	0.11817
MMD2	221938	monocyte to macrophage differentiation-associated 2	3.1479	2.54593	1.51778	0.132868	0.445846
SMAD1	4086	SMAD family member 1	7.91711	7.31517	1.51775	0.0139124	0.132256
CWC27	10283	CWC27 spliceosome-associated protein homolog	10.9957	10.394	1.5175	0.00545213	0.0762988
EGLN3	112399	egl-9 family hypoxia-inducible factor 3	4.37709	3.77547	1.51742	0.114433	0.41826
VPS37C	55048	vacuolar protein sorting 37 homolog C (S. cerevisiae)	8.26003	7.6585	1.51732	0.0135647	0.130406
AMDHD2	51005	amidohydrolase domain containing 2	6.78526	6.18377	1.51729	0.0404579	0.240224
TPRG1L	127262	tumor protein p63 regulated 1-like	12.0104	11.409	1.51721	0.0649185	0.312379
FBL	2091	fibrillarin	13.8836	13.2826	1.5168	0.0206348	0.162955
KRT35	3886	keratin 35, type I	5.05582	4.4548	1.51678	0.0866838	0.363423
EIF3A	8661	eukaryotic translation initiation factor 3, subunit A	14.8484	14.2475	1.51673	0.0128555	0.125774
NCS1	23413	neuronal calcium sensor 1	6.98458	6.38363	1.51672	0.836384	0.946922
SPPL3	121665	signal peptide peptidase like 3	10.3191	9.71828	1.51656	0.00599725	0.0813489
USP32	84669	ubiquitin specific peptidase 32	8.67329	8.07252	1.51652	0.10699	0.404542
SYK	6850	spleen tyrosine kinase	6.49873	5.89801	1.51647	0.00628586	0.0830195
AKT1	207	v-akt murine thymoma viral oncogene homolog 1	9.69103	9.09035	1.51643	0.023874	0.178763
TXK	7294	TXK tyrosine kinase	7.19777	6.59733	1.51618	0.0115027	0.118156
NCKAP1	10787	NCK-associated protein 1	12.5126	11.9122	1.51617	0.112482	0.414951
TEX36	387718	testis expressed 36	4.03956	3.43926	1.51603	0.0576928	0.29343
OPLAH	26873	5-oxoprolinase (ATP-hydrolysing)	5.97725	5.37704	1.51593	0.190731	0.52303
SLC48A1	55652	solute carrier family 48 (heme transporter), member 1	8.8226	8.22248	1.51584	0.168911	0.496698
SCOC	60592	short coiled-coil protein	10.8302	10.2301	1.51576	0.0929162	0.375942
RAD50	10111	RAD50 homolog, double strand break repair protein	13.4237	12.8239	1.51556	0.00839239	0.0973651
NOP9	161424	NOP9 nucleolar protein	5.14577	4.54595	1.51553	0.0212151	0.166066
MINPP1	9562	multiple inositol-polyphosphate phosphatase 1	8.82242	8.22323	1.51487	0.0144846	0.1355
KSR1	8844	kinase suppressor of ras 1	6.21125	5.61212	1.5148	0.0119808	0.120414
WDR38	401551	WD repeat domain 38	5.2679	4.66879	1.51479	0.15374	0.475575
HRSP12	10247	heat-responsive protein 12	7.7666	7.16756	1.51471	0.0170073	0.148041
DBN1	1627	drebrin 1	9.31289	8.71392	1.51463	0.0505212	0.272504
COX18	285521	COX18 cytochrome c oxidase assembly factor	8.28975	7.69121	1.51418	0.0157877	0.141989
MAP2K7	5609	mitogen-activated protein kinase kinase 7	6.22556	5.62742	1.51377	0.0126651	0.124828
RBM24	221662	RNA binding motif protein 24	5.28899	4.69103	1.51357	0.0215879	0.167699
IL21	59067	interleukin 21	4.90494	4.30705	1.5135	0.0784274	0.345261
ESD		Transcript Identified by AceView, Entrez Gene ID(s) 2098	5.36084	4.763	1.51345	0.0272213	0.19307
SCN8A		Jeck2013 ANTISENSE, coding, INTERNAL, intronic best transcript NM_014191	10.7875	10.1898	1.51323	0.0055682	0.077199
TAF9B	51616	TAF9B RNA polymerase II, TATA box binding protein (TBP)-associated factor, 31kDa	9.11191	8.51439	1.51311	0.0153694	0.140334
ENPP4	22875	ectonucleotide pyrophosphatase/phosphodiesterase 4 (putative)	8.16968	7.57223	1.51303	0.0446461	0.25474
HARS	3035	histidyl-tRNA synthetase	10.7622	10.1649	1.51289	0.00692625	0.0877715
NAALADL1	10004	N-acetylated alpha-linked acidic dipeptidase-like 1	5.54612	4.94891	1.51279	0.419305	0.733764
GARS	2617	glycyl-tRNA synthetase	15.0751	14.478	1.51258	0.0041708	0.0647769
KRTAP4-5	85289	keratin associated protein 4-5	5.2015	4.60466	1.51241	0.206428	0.541148
MZT2A	653784	mitotic spindle organizing protein 2A	9.65978	9.06303	1.51231	0.226249	0.565698
CYP3A43	64816	cytochrome P450, family 3, subfamily A, polypeptide 43	3.40106	2.80482	1.51178	0.0431748	0.249869
ZCWPW1	55063	zinc finger, CW type with PWWP domain 1	4.72468	4.12901	1.51117	0.11863	0.423708
C19orf70	125988	chromosome 19 open reading frame 70	6.55331	5.95812	1.51067	0.193363	0.525933
ZNF888	388559	zinc finger protein 888	8.5609	7.96572	1.51067	0.0370332	0.230405
F2	2147	coagulation factor II (thrombin)	3.82686	3.23199	1.51034	0.956504	0.988081
SERPINH1	871	serpin peptidase inhibitor, clade H (heat shock protein 47), member 1, (collagen binding protein 1)	8.52816	7.93343	1.51019	0.0368491	0.230151
LRRC56	115399	leucine rich repeat containing 56	9.15283	8.55815	1.51014	0.0378448	0.233112
MMP25	64386	matrix metallopeptidase 25	4.08798	3.49356	1.50987	0.0782659	0.344904
ASXL2	55252	additional sex combs like transcriptional regulator 2	11.1062	10.5119	1.50983	0.0228443	0.173439
ZBTB26	57684	zinc finger and BTB domain containing 26	8.04233	7.448	1.50978	0.0284761	0.197847
CSN2	1447	casein beta	3.24192	2.6476	1.50976	0.0928152	0.375604
AGBL2	79841	ATP/GTP binding protein-like 2	6.27191	5.67791	1.50942	0.209603	0.545175
JARID2	3720	jumonji, AT rich interactive domain 2	7.91378	7.31992	1.50928	0.0146973	0.137056
USF2	7392	upstream transcription factor 2, c-fos interacting	9.42763	8.83388	1.50917	0.00668617	0.0860174
EMILIN2	84034	elastin microfibril interfacer 2	6.42731	5.83357	1.50916	0.0701212	0.32518
KRBA2	124751	KRAB-A domain containing 2	3.91364	3.32003	1.50901	0.0109286	0.114533
FAM132B	151176	family with sequence similarity 132, member B	5.80243	5.20891	1.50892	0.678051	0.880629
AGBL5	60509	ATP/GTP binding protein-like 5	11.1916	10.5985	1.50851	0.00509375	0.0730775
CARS2	79587	cysteinyl-tRNA synthetase 2, mitochondrial (putative)	9.04686	8.45433	1.50788	0.503711	0.789217
COA6	388753	cytochrome c oxidase assembly factor 6	9.01895	8.42672	1.50758	0.0215341	0.167463
MFAP3	4238	microfibrillar associated protein 3	3.93279	3.34074	1.50739	0.504499	0.789817
SERINC5		Memczak2013 ALT_ACCEPTOR, ALT_DONOR, coding, INTERNAL, intronic best transcript NM_001174072	6.53826	5.94651	1.50707	0.0862048	0.36243
ZNF112	7771	zinc finger protein 112	5.22457	4.63283	1.50707	0.021534	0.167463
PELO	53918	pelota homolog (Drosophila)	9.00895	8.41742	1.50684	0.0048324	0.0708444
TDGF1	6997	teratocarcinoma-derived growth factor 1	6.25183	5.66034	1.5068	0.1651	0.491202
UBE2R2	54926	ubiquitin-conjugating enzyme E2R 2	10.3848	9.79334	1.50678	0.00786981	0.0936171
BACH2		Memczak2013 ALT_ACCEPTOR, ALT_DONOR, coding, INTERNAL, intronic best transcript NM_001170794	3.77029	3.17889	1.50672	0.115449	0.419994
UPF1	5976	UPF1 regulator of nonsense transcripts homolog (yeast)	7.14936	6.55845	1.50619	0.0216246	0.167862
ANKEF1	63926	ankyrin repeat and EF-hand domain containing 1	7.9306	7.33994	1.50594	0.231999	0.571855
LINGO1-AS1	253044	LINGO1 antisense RNA 1	4.00916	3.41861	1.50582	0.0459696	0.258996
DHRS11	79154	dehydrogenase/reductase (SDR family) member 11	9.61716	9.0268	1.50562	0.0125394	0.124224
WDR89	112840	WD repeat domain 89	9.27479	8.68447	1.50558	0.0128601	0.125774
INSC	387755	inscuteable homolog (Drosophila)	4.15473	3.56442	1.50557	0.161214	0.485362
SASH1	23328	SAM and SH3 domain containing 1	7.80356	7.21354	1.50527	0.0130891	0.12744
MYEOV2	150678	myeloma overexpressed 2	9.35801	8.76802	1.50524	0.147682	0.466562
NCR3	259197	natural cytotoxicity triggering receptor 3	5.72091	5.1311	1.50506	0.0154375	0.140756
MED25	81857	mediator complex subunit 25	5.32024	4.73066	1.50481	0.231945	0.571812
VAC14	55697	Vac14 homolog (S. cerevisiae)	8.13973	7.55026	1.50469	0.00339212	0.0581104
RPAP3	79657	RNA polymerase II associated protein 3	10.6982	10.1087	1.50464	0.247504	0.587219
COX5A	9377	cytochrome c oxidase subunit Va	12.7659	12.1766	1.50458	0.0117821	0.119619
MANSC1	54682	MANSC domain containing 1	10.3099	9.72057	1.50451	0.00398811	0.0635133
SNX17	9784	sorting nexin 17	9.17579	8.58708	1.5039	0.0127675	0.125268
KCNQ5		Jeck2013 ALT_ACCEPTOR, ALT_DONOR, coding, INTERNAL, intronic best transcript NM_001160133	3.13713	2.5485	1.50382	0.400233	0.721
CUX1	1523	cut-like homeobox 1	11.6112	11.0229	1.50345	0.0148585	0.137602
LLGL1	3996	lethal giant larvae homolog 1 (Drosophila)	7.26857	6.68038	1.50335	0.0141098	0.133258
SLC44A3	126969	solute carrier family 44, member 3	9.00161	8.41346	1.50331	0.0907807	0.371152
CALR3	125972	calreticulin 3	4.66659	4.07852	1.50323	0.69783	0.889885
ERCC2	2068	excision repair cross-complementation group 2	9.80981	9.22199	1.50297	0.00752856	0.0916909
UBTD1	80019	ubiquitin domain containing 1	9.15927	8.57155	1.50286	0.117783	0.423249
PRAMEF25	441873	PRAME family member 25	4.20561	3.61802	1.50274	0.152829	0.474505
CENPB	1059	centromere protein B	7.21631	6.62912	1.50232	0.027919	0.195625
HTRA1	5654	HtrA serine peptidase 1	3.75463	3.16755	1.5022	0.0209472	0.164634
POP5	51367	POP5 homolog, ribonuclease P/MRP subunit	6.39174	5.80501	1.50185	0.140047	0.455129
ST3GAL2	6483	ST3 beta-galactoside alpha-2,3-sialyltransferase 2	4.96007	4.3734	1.50177	0.0251309	0.184015
ACTN1	87	actinin, alpha 1	12.946	12.3596	1.50156	0.00837168	0.0972148
AFMID	125061	arylformamidase	7.32321	6.73679	1.50152	0.0237742	0.178477
ZNF780A	284323	zinc finger protein 780A	8.50651	7.92018	1.50143	0.0134376	0.129883
C2CD2L	9854	C2CD2-like	6.67357	6.08732	1.50134	0.198955	0.531726
D2HGDH	728294	D-2-hydroxyglutarate dehydrogenase	6.55351	5.96753	1.50106	0.00514995	0.0734904
EPS8L2	64787	EPS8-like 2	11.4138	10.8279	1.50088	0.00335008	0.057562
SFPQ	6421	splicing factor proline/glutamine-rich	13.2709	12.6851	1.50084	0.0317534	0.211308
SMIM22	440335	small integral membrane protein 22	8.59979	8.01411	1.50075	0.0195456	0.158415
TPM2	7169	tropomyosin 2 (beta)	10.0125	9.42683	1.50072	0.00878902	0.0998503
ZNF768	79724	zinc finger protein 768	8.86158	8.27597	1.50067	0.00836513	0.0972148
PSMG3-AS1	114796	PSMG3 antisense RNA 1 (head to head)	6.80054	6.21503	1.50057	0.038864	0.236335
C9orf129	445577	chromosome 9 open reading frame 129	4.97011	4.38463	1.50054	0.0237275	0.178289
SF3A2	8175	splicing factor 3a subunit 2	11.7556	11.1701	1.50048	0.00417087	0.0647769
CDC42		Transcript Identified by AceView, Entrez Gene ID(s) 998	7.97478	7.38954	1.50028	0.0644615	0.31153
HOXD9	3235	homeobox D9	3.62808	3.04342	1.49968	0.106387	0.403572
RILP	83547	Rab interacting lysosomal protein	6.8624	6.27776	1.49967	0.240891	0.581735
FAAP20	199990	Fanconi anemia core complex associated protein 20	6.71329	6.1288	1.49951	0.0943685	0.379036
RSPO4	343637	R-spondin 4	6.18053	5.59623	1.49931	0.00737317	0.0908047
ANKRD26	22852	ankyrin repeat domain 26	8.36941	7.78518	1.49924	0.0390751	0.236613
SEPT1	1731	septin 1	4.21199	3.62785	1.49914	0.0320872	0.212606
CDT1	81620	chromatin licensing and DNA replication factor 1	4.12059	3.53681	1.49877	0.157212	0.479983
FOCAD	54914	focadhesin	8.39637	7.81278	1.49857	0.0362929	0.228139
SLC25A44	9673	solute carrier family 25, member 44	7.66615	7.0833	1.49781	0.0220588	0.170003
ZNHIT2	741	zinc finger, HIT-type containing 2	5.27051	4.68787	1.49759	0.341708	0.67604
GSKIP	51527	GSK3B interacting protein	9.14895	8.5666	1.49728	0.049575	0.269153
CYB5D2	124936	cytochrome b5 domain containing 2	6.1186	5.53635	1.49718	0.0388519	0.236335
ZNF32	7580	zinc finger protein 32	6.05853	5.47634	1.49712	0.0080676	0.0946487
NRIP3	56675	nuclear receptor interacting protein 3	3.3762	2.79404	1.49708	0.0455374	0.257565
IQCF1	132141	IQ motif containing F1	3.53844	2.95633	1.49704	0.517838	0.799017
FMNL2	114793	formin like 2	9.02166	8.43976	1.49682	0.00959954	0.105559
NLK	51701	nemo-like kinase	10.0935	9.51168	1.49671	0.00682737	0.0870866
WFDC10B	280664	WAP four-disulfide core domain 10B	4.02843	3.44677	1.49658	0.0326551	0.214448
GLT1D1	144423	glycosyltransferase 1 domain containing 1	5.43981	4.85827	1.49645	0.210936	0.546328
SLC10A5	347051	solute carrier family 10, member 5	7.85501	7.27349	1.49642	0.0922297	0.374361
EN2	2020	engrailed homeobox 2	3.75162	3.17015	1.49638	0.0339475	0.218857
ADO	84890	2-aminoethanethiol (cysteamine) dioxygenase	8.79864	8.21723	1.49631	0.205389	0.539718
RREB1	6239	ras responsive element binding protein 1	11.1435	10.5621	1.49627	0.00510806	0.0731245
SBSPON	157869	somatomedin B and thrombospondin type 1 domain containing	10.7097	10.1284	1.4962	0.106024	0.402691
ZNF513	130557	zinc finger protein 513	7.00901	6.42777	1.49613	0.0174076	0.149945
LOC79999		Homo sapiens uncharacterized LOC79999 (LOC79999), mRNA.	6.26218	5.68109	1.49599	0.0258441	0.187075
CCDC84	338657	coiled-coil domain containing 84	6.04762	5.46654	1.49597	0.0922635	0.374361
CASP2	835	caspase 2	13.149	12.5681	1.49581	0.00630156	0.0830195
LARP4	113251	La ribonucleoprotein domain family, member 4	10.4307	9.84999	1.49554	0.0218387	0.168913
HTR3B	9177	5-hydroxytryptamine (serotonin) receptor 3B, ionotropic	4.00821	3.42775	1.49533	0.086119	0.36243
MRPL10	124995	mitochondrial ribosomal protein L10	9.25747	8.67726	1.49507	0.0167684	0.146675
RAB43	339122	RAB43, member RAS oncogene family	8.31804	7.73834	1.49454	0.389408	0.713634
TRRAP	8295	transformation/transcription domain-associated protein	7.99488	7.41566	1.49405	0.0132146	0.128364
CAAP1	79886	caspase activity and apoptosis inhibitor 1	10.5241	9.94491	1.49401	0.0114983	0.118156
RPS14	6208	ribosomal protein S14	14.8587	14.2796	1.49401	0.0171044	0.148464
SLC25A30	253512	solute carrier family 25, member 30	6.45992	5.88073	1.49401	0.0967775	0.383281
PNMA5	114824	paraneoplastic Ma antigen family member 5	4.69864	4.11946	1.494	0.228578	0.568279
GUCA1C	9626	guanylate cyclase activator 1C	4.13987	3.56125	1.49342	0.343822	0.677404
FAM109A	144717	family with sequence similarity 109, member A	4.59739	4.01878	1.49341	0.0355234	0.225083
IKBKB	3551	inhibitor of kappa light polypeptide gene enhancer in B-cells, kinase beta	7.49442	6.91583	1.49339	0.0173604	0.149838
NOXO1	124056	NADPH oxidase organizer 1	4.91119	4.33296	1.49302	0.0299976	0.20438
LAMA5	3911	laminin, alpha 5	9.10299	8.52486	1.49292	0.0568115	0.290671
PCK2	5106	phosphoenolpyruvate carboxykinase 2 (mitochondrial)	6.52418	5.9462	1.49276	0.0516955	0.276224
SBNO1	55206	strawberry notch homolog 1 (Drosophila)	10.627	10.0493	1.49241	0.0432977	0.250137
SNF8	11267	SNF8, ESCRT-II complex subunit	11.6848	11.1072	1.49237	0.0148542	0.137602
VPRBP	9730	Vpr (HIV-1) binding protein	8.10623	7.52877	1.49222	0.0578957	0.293905
RERG	85004	RAS-like, estrogen-regulated, growth inhibitor	4.3125	3.7351	1.49216	0.423311	0.736167
SLC4A4	8671	solute carrier family 4 (sodium bicarbonate cotransporter), member 4	6.72109	6.14396	1.49188	0.0179959	0.152533
SKP2		Transcript Identified by AceView, Entrez Gene ID(s) 6502	5.5218	4.94475	1.4918	0.317507	0.655088
BRI3	25798	brain protein I3	9.03889	8.46193	1.4917	0.0497659	0.269744
DGKQ	1609	diacylglycerol kinase theta	5.44411	4.86717	1.49167	0.888559	0.965435
OGG1	4968	8-oxoguanine DNA glycosylase	7.80182	7.22492	1.49164	0.00959804	0.105559
GPR132	29933	G protein-coupled receptor 132	3.91871	3.34202	1.49142	0.0613042	0.303205
HOXC11	3227	homeobox C11	3.42916	2.85259	1.4913	0.238576	0.579286
BEX4	56271	brain expressed X-linked 4	4.3352	3.75891	1.49101	0.917473	0.974118
CUL9	23113	cullin 9	5.29651	4.72028	1.49094	0.013905	0.132256
CNKSR3	154043	CNKSR family member 3	5.45085	4.87494	1.49062	0.133534	0.446644
CETP	1071	cholesteryl ester transfer protein, plasma	4.1715	3.59562	1.49059	0.245	0.584494
MRAP	56246	melanocortin 2 receptor accessory protein	4.95039	4.37451	1.49058	0.0184535	0.154666
LY6K	54742	lymphocyte antigen 6 complex, locus K	4.10977	3.53422	1.49024	0.467314	0.766031
TSTA3	7264	tissue specific transplantation antigen P35B	12.5723	11.9968	1.49017	0.0182102	0.153647
NREP	9315	neuronal regeneration related protein	8.20234	7.62693	1.4901	0.0274613	0.194106
SIX5	147912	SIX homeobox 5	5.77495	5.19972	1.48992	0.0699059	0.324891
SWSAP1	126074	SWIM-type zinc finger 7 associated protein 1	4.43495	3.85996	1.48967	0.191781	0.523991
OR7A5	26659	olfactory receptor, family 7, subfamily A, member 5	3.94165	3.36672	1.48961	0.0182943	0.153933
BTBD2	55643	BTB (POZ) domain containing 2	10.0791	9.50428	1.4895	0.00965461	0.105811
PRTN3	5657	proteinase 3	4.47168	3.89708	1.48927	0.0917883	0.373681
MED12	9968	mediator complex subunit 12	10.7938	10.2194	1.48913	0.0179688	0.15245
ULK3	25989	unc-51 like kinase 3	9.65385	9.07947	1.48904	0.0125064	0.124069
ARL2	402	ADP-ribosylation factor like GTPase 2	9.69646	9.12223	1.48888	0.0115151	0.11817
GXYLT1	283464	glucoside xylosyltransferase 1	8.40342	7.82924	1.48883	0.0249937	0.183773
RAB3IL1	5866	RAB3A interacting protein (rabin3)-like 1	7.94569	7.37157	1.48877	0.198287	0.531499
MIR4728	100616132	microRNA 4728	9.08271	8.50884	1.48852	0.0234253	0.176676
SLC35C1	55343	solute carrier family 35 (GDP-fucose transporter), member C1	8.32913	7.75549	1.48828	0.00745733	0.0912407
UBASH3A	53347	ubiquitin associated and SH3 domain containing A	4.45466	3.88121	1.48808	0.0593718	0.297873
CHD4	1108	chromodomain helicase DNA binding protein 4	9.17664	8.6035	1.48776	0.0235929	0.177614
RAB4A	5867	RAB4A, member RAS oncogene family	10.7203	10.1474	1.48749	0.0119705	0.120367
VASP	7408	vasodilator-stimulated phosphoprotein	12.2416	11.669	1.48725	0.0185049	0.154725
TJP2	9414	tight junction protein 2	8.45959	7.88703	1.48716	0.0147253	0.137138
LIMK1		Memczak2013 ANTISENSE, CDS, coding, INTERNAL best transcript NM_001204426	7.35316	6.78091	1.48684	0.0234063	0.176669
SOCS2	8835	suppressor of cytokine signaling 2	4.09083	3.51865	1.48677	0.0682218	0.32034
PHACTR1	221692	phosphatase and actin regulator 1	3.2401	2.66804	1.48664	0.0567162	0.290322
ZNF646		Memczak2013 ANTISENSE, coding, INTERNAL, intronic best transcript NM_014699	4.55892	3.98689	1.48662	0.0843836	0.358321
CLCNKA	1187	chloride channel, voltage-sensitive Ka	5.55179	4.97994	1.48643	0.0285523	0.198184
GALNT13	114805	polypeptide N-acetylgalactosaminyltransferase 13	5.23569	4.66394	1.48632	0.0762866	0.339573
CEACAM19	56971	carcinoembryonic antigen-related cell adhesion molecule 19	6.58711	6.01576	1.48591	0.0157891	0.141989
FBXL14	144699	F-box and leucine-rich repeat protein 14	8.92889	8.35756	1.4859	0.0441973	0.25319
MYOZ3	91977	myozenin 3	3.12476	2.5536	1.48571	0.106145	0.403008
TSPAN11	441631	tetraspanin 11	5.12652	4.55554	1.48553	0.488785	0.779323
AGER	177	advanced glycosylation end product-specific receptor	6.22433	5.6539	1.48497	0.356685	0.687471
YIPF1	54432	Yip1 domain family member 1	7.86223	7.29181	1.48495	0.0109378	0.114533
CFL2	1073	cofilin 2 (muscle)	7.0542	6.48382	1.48492	0.0903793	0.369923
SRRM2	23524	serine/arginine repetitive matrix 2	12.6405	12.0702	1.48478	0.0983291	0.387435
SH3D19	152503	SH3 domain containing 19	11.9587	11.3885	1.48472	0.106479	0.40368
NDUFA12	55967	NADH dehydrogenase (ubiquinone) 1 alpha subcomplex, 12	4.10474	3.53479	1.48448	0.0384896	0.235394
KIAA1468	57614	KIAA1468	7.78397	7.21461	1.48387	0.114065	0.417511
DCAF7	10238	DDB1 and CUL4 associated factor 7	11.3472	10.778	1.48372	0.0115954	0.118541
CCDC180	100499483	coiled-coil domain containing 180	4.44958	3.88046	1.48361	0.0423174	0.246905
GLTP	51228	glycolipid transfer protein	7.10938	6.54065	1.48322	0.00600008	0.0813489
RAB11FIP4	84440	RAB11 family interacting protein 4 (class II)	9.3412	8.77248	1.4832	0.0107829	0.113647
ACSS3	79611	acyl-CoA synthetase short-chain family member 3	4.28292	3.71421	1.4832	0.142654	0.458786
PTK2		Transcript Identified by AceView, Entrez Gene ID(s) 5747	6.40847	5.83983	1.48312	0.1917	0.523991
AP5Z1	9907	adaptor-related protein complex 5, zeta 1 subunit	5.23415	4.66579	1.48284	0.109397	0.409414
OOEP	441161	oocyte expressed protein	3.65785	3.08951	1.48281	0.425934	0.738178
B3GALT4	8705	UDP-Gal:betaGlcNAc beta 1,3-galactosyltransferase 4	5.42092	4.85262	1.48278	0.063821	0.310252
SLC6A20	54716	solute carrier family 6 (proline IMINO transporter), member 20	4.34298	3.77485	1.4826	0.00916254	0.102781
UQCC1	55245	ubiquinol-cytochrome c reductase complex assembly factor 1	10.4035	9.83536	1.48259	0.0218724	0.169113
FAM117B	150864	family with sequence similarity 117, member B	12.3189	11.751	1.48231	0.00640427	0.0836025
PMP22	5376	peripheral myelin protein 22	4.33444	3.76674	1.48215	0.0800885	0.349134
FAM179A	165186	family with sequence similarity 179, member A	4.39745	3.82981	1.4821	0.0494445	0.268954
RBM47	54502	RNA binding motif protein 47	11.3914	10.8238	1.48208	0.0432321	0.24993
GADL1	339896	glutamate decarboxylase like 1	3.22406	2.65677	1.48174	0.527804	0.80566
MYH9		Zhang2013 ALT_ACCEPTOR, ALT_DONOR, coding, INTERNAL, intronic best transcript NM_002473	5.4367	4.86962	1.48152	0.0812808	0.351114
TBC1D17	79735	TBC1 domain family, member 17	7.91951	7.35294	1.481	0.504272	0.789693
PGRMC2	10424	progesterone receptor membrane component 2	12.5067	11.9403	1.48088	0.127127	0.43675
LINC00961	158376	long intergenic non-protein coding RNA 961	6.19988	5.6337	1.4806	0.957825	0.988663
DYNLL2		Memczak2013 ANTISENSE, coding, INTERNAL, UTR3 best transcript NM_080677	4.55611	3.99003	1.48049	0.083993	0.357419
OR4X1	390113	olfactory receptor, family 4, subfamily X, member 1 (gene/pseudogene)	3.7689	3.20296	1.48035	0.515956	0.797911
PLEKHA5	54477	pleckstrin homology domain containing, family A member 5	9.70709	9.1412	1.48031	0.00683624	0.08712
SARS2	54938	seryl-tRNA synthetase 2, mitochondrial	8.0996	7.53385	1.48015	0.269016	0.608586
GOSR1	9527	golgi SNAP receptor complex member 1	12.8223	12.2567	1.47999	0.013521	0.130161
KLHDC4	54758	kelch domain containing 4	4.89949	4.33412	1.47976	0.301331	0.641738
USP17L4	645402	ubiquitin specific peptidase 17-like family member 4	3.3578	2.79253	1.47967	0.00389732	0.0629479
UBTD2	92181	ubiquitin domain containing 2	7.17355	6.60829	1.47966	0.0126363	0.124666
KRTAP20-2	337976	keratin associated protein 20-2	4.67601	4.11095	1.47945	0.0837625	0.35681
MBOAT2	129642	membrane bound O-acyltransferase domain containing 2	5.34303	4.77805	1.47937	0.404038	0.723476
ACACA	31	acetyl-CoA carboxylase alpha	13.7017	13.1368	1.47932	0.0411366	0.242794
AKT1S1	84335	AKT1 substrate 1 (proline rich)	9.35562	8.79068	1.47932	0.011966	0.120367
C6orf118	168090	chromosome 6 open reading frame 118	3.79093	3.22608	1.47924	0.15557	0.477623
ADGRG7	84873	adhesion G protein-coupled receptor G7	3.50106	2.93623	1.47921	0.0396505	0.238348
NEK6	10783	NIMA-related kinase 6	9.49599	8.93126	1.47911	0.0187133	0.155446
NONO	4841	non-POU domain containing, octamer-binding	14.2053	13.6409	1.47885	0.0183676	0.154429
FH	2271	fumarate hydratase	9.61846	9.05401	1.47882	0.0758968	0.33885
FAM83E	54854	family with sequence similarity 83, member E	6.41594	5.85158	1.47874	0.0403613	0.240224
IL4R	3566	interleukin 4 receptor	10.1702	9.6064	1.47818	0.0138075	0.131845
TAL2	6887	T-cell acute lymphocytic leukemia 2	3.04455	2.48079	1.47812	0.0284486	0.197793
TMEM63B	55362	transmembrane protein 63B	8.64402	8.08039	1.47798	0.0187805	0.155583
FAM110C	642273	family with sequence similarity 110, member C	7.99615	7.43267	1.47784	0.00904854	0.101769
LOC100505841	100505841	zinc finger protein 474-like	5.28417	4.72071	1.47781	0.31038	0.649276
ING5	84289	inhibitor of growth family member 5	7.31532	6.75239	1.47726	0.0250292	0.183792
LCLAT1	253558	lysocardiolipin acyltransferase 1	13.6948	13.1321	1.47707	0.0343383	0.220505
CHCHD1	118487	coiled-coil-helix-coiled-coil-helix domain containing 1	7.7984	7.23568	1.47705	0.940181	0.983556
PPFIA2	8499	protein tyrosine phosphatase, receptor type, f polypeptide (PTPRF), interacting protein (liprin), alpha 2	4.6553	4.09288	1.47675	0.162513	0.486948
FKBP9	11328	FK506 binding protein 9	13.0288	12.4665	1.47669	0.0127764	0.125298
CEP170B	283638	centrosomal protein 170B	7.99401	7.43171	1.47662	0.0127917	0.125334
ZNF141		Transcript Identified by AceView, Entrez Gene ID(s) 100288237; 7700	3.81268	3.25046	1.47654	0.0933176	0.376983
SERPINB1	1992	serpin peptidase inhibitor, clade B (ovalbumin), member 1	13.512	12.9498	1.4765	0.0279601	0.195728
TRIM8	81603	tripartite motif containing 8	8.68652	8.12445	1.47639	0.0261779	0.188314
ALG8	79053	ALG8, alpha-1,3-glucosyltransferase	11.9361	11.3741	1.47636	0.0435374	0.250839
PANX2	56666	pannexin 2	5.6418	5.08008	1.47603	0.0346027	0.22121
RUFY1	80230	RUN and FYVE domain containing 1	9.1038	8.54225	1.47586	0.0236644	0.178077
MYO1G	64005	myosin IG	4.01951	3.45801	1.4758	0.121306	0.428496
DNAAF1	123872	dynein, axonemal, assembly factor 1	4.89793	4.3369	1.47532	0.667968	0.87635
EPB41L3	23136	erythrocyte membrane protein band 4.1-like 3	3.41314	2.85219	1.47524	0.0718494	0.329436
MLXIP	22877	MLX interacting protein	7.04974	6.48901	1.47501	0.169626	0.497286
PHLPP2	23035	PH domain and leucine rich repeat protein phosphatase 2	9.13349	8.57288	1.47489	0.171769	0.499945
TMEM42	131616	transmembrane protein 42	6.01841	5.45804	1.47465	0.0248203	0.183188
SLC17A8	246213	solute carrier family 17 (vesicular glutamate transporter), member 8	3.45008	2.88992	1.47442	0.225836	0.56532
ETNK2	55224	ethanolamine kinase 2	3.02301	2.4629	1.47438	0.630823	0.858697
ADK	132	adenosine kinase	10.3973	9.83736	1.47416	0.134459	0.447212
ZBTB46	140685	zinc finger and BTB domain containing 46	7.17122	6.6114	1.47408	0.0294014	0.201663
CCDC74A	90557	coiled-coil domain containing 74A	4.99879	4.43931	1.47373	0.253648	0.592555
SRF	6722	serum response factor	7.05032	6.49087	1.4737	0.0244518	0.181531
NAB2	4665	NGFI-A binding protein 2 (EGR1 binding protein 2)	5.98915	5.42983	1.47358	0.010248	0.110175
PABPC4L	132430	poly(A) binding protein, cytoplasmic 4-like	5.42743	4.86847	1.47321	0.569873	0.828204
CLUH	23277	clustered mitochondria (cluA/CLU1) homolog	9.60898	9.05047	1.47275	0.0389958	0.236483
SPNS1	83985	spinster homolog 1 (Drosophila)	8.6927	8.13427	1.47266	0.00526379	0.07452
SNAI3	333929	snail family zinc finger 3	4.81643	4.25802	1.47265	0.612957	0.849106
SMARCD3	6604	SWI/SNF related, matrix associated, actin dependent regulator of chromatin, subfamily d, member 3	5.64668	5.08872	1.47219	0.0279138	0.195625
SLC9A7	84679	solute carrier family 9, subfamily A (NHE7, cation proton antiporter 7), member 7	6.98423	6.42635	1.4721	0.00393436	0.0631146
PRR14L	253143	proline rich 14-like	9.10659	8.54877	1.47204	0.232363	0.572447
PHLDA2	7262	pleckstrin homology-like domain, family A, member 2	9.67532	9.11757	1.47197	0.201677	0.535
NPY	4852	neuropeptide Y	3.78588	3.22836	1.47174	0.226106	0.565569
TC2N	123036	tandem C2 domains, nuclear	12.0123	11.4553	1.47121	0.0493182	0.268657
UTRN	7402	utrophin	11.8166	11.2597	1.47111	0.00521771	0.0742104
FGF10	2255	fibroblast growth factor 10	4.58865	4.03183	1.47102	0.984727	0.996155
ARHGAP27	201176	Rho GTPase activating protein 27	5.80576	5.24899	1.47098	0.0849223	0.359335
MED24	9862	mediator complex subunit 24	10.4898	9.9332	1.47081	0.0139863	0.132676
ORC4	5000	origin recognition complex subunit 4	10.6942	10.1378	1.47058	0.0777899	0.343866
PTEN	5728	phosphatase and tensin homolog	12.3332	11.7768	1.47057	0.0077927	0.0930093
MAP7	9053	microtubule-associated protein 7	9.66481	9.10861	1.4704	0.0120639	0.12108
NDUFB11	54539	NADH dehydrogenase (ubiquinone) 1 beta subcomplex, 11, 17.3kDa	10.5595	10.0039	1.46973	0.0392395	0.237019
PLCL2	23228	phospholipase C-like 2	6.68184	6.12632	1.4697	0.157894	0.480735
ZNF609	23060	zinc finger protein 609	11.0419	10.4864	1.46963	0.0408733	0.242102
TOB2	10766	transducer of ERBB2, 2	8.43879	7.88338	1.46958	0.0140135	0.132698
ZZEF1	23140	zinc finger, ZZ-type with EF-hand domain 1	6.33146	5.77626	1.46937	0.0749494	0.336543
RNF113B	140432	ring finger protein 113B	3.91571	3.36061	1.46927	0.317312	0.655088
CWH43	80157	cell wall biogenesis 43 C-terminal homolog	4.44782	3.89307	1.46891	0.253103	0.592189
GNPTAB	79158	N-acetylglucosamine-1-phosphate transferase, alpha and beta subunits	9.02613	8.47163	1.46866	0.178146	0.507758
FMR1	2332	fragile X mental retardation 1	11.4617	10.9072	1.46864	0.108077	0.406708
AMPH	273	amphiphysin	3.62446	3.07001	1.46861	0.445243	0.753151
GPR78	27201	G protein-coupled receptor 78	3.38985	2.83603	1.46797	0.422864	0.736167
ARL6IP5	10550	ADP-ribosylation factor like GTPase 6 interacting protein 5	13.1367	12.5832	1.46765	0.1447	0.461528
ANKRD11	29123	ankyrin repeat domain 11	10.3826	9.82919	1.46755	0.00325986	0.0563396
HNRNPUL2	221092	heterogeneous nuclear ribonucleoprotein U-like 2	10.8287	10.2756	1.46729	0.0259582	0.187397
GSK3A	2931	glycogen synthase kinase 3 alpha	10.6043	10.0515	1.46693	0.0720959	0.329845
YARS	8565	tyrosyl-tRNA synthetase	12.1045	11.5517	1.4669	0.0131857	0.128227
KCNQ1	3784	potassium channel, voltage gated KQT-like subfamily Q, member 1	6.6995	6.14675	1.46687	0.081119	0.350916
BDH2	56898	3-hydroxybutyrate dehydrogenase, type 2	7.05494	6.50247	1.4666	0.0322999	0.213165
FAM160A2	84067	family with sequence similarity 160, member A2	11.0548	10.5025	1.46649	0.004082	0.0643017
FAM149A	25854	family with sequence similarity 149, member A	7.11126	6.55903	1.46635	0.0138431	0.132017
C2orf15	150590	chromosome 2 open reading frame 15	8.71079	8.15883	1.46608	0.203988	0.537882
STYXL1	51657	serine/threonine/tyrosine interacting-like 1	7.84379	7.29186	1.46604	0.0222721	0.170717
TMLHE	55217	trimethyllysine hydroxylase, epsilon	9.97412	9.42247	1.46576	0.010613	0.112355
SACS	26278	sacsin molecular chaperone	6.73986	6.18822	1.46575	0.164993	0.491057
POMK	84197	protein-O-mannose kinase	9.14353	8.59207	1.46556	0.0339883	0.218981
SNX6	58533	sorting nexin 6	11.1727	10.6214	1.4654	0.0471485	0.262319
PLCB3	5331	phospholipase C, beta 3 (phosphatidylinositol-specific)	9.72284	9.17165	1.4653	0.0160883	0.143703
PCNX	22990	pecanex homolog (Drosophila)	10.3041	9.75296	1.46528	0.0190437	0.156572
ZFYVE21	79038	zinc finger, FYVE domain containing 21	8.12813	7.57698	1.46525	0.349156	0.682035
FEM1A	55527	fem-1 homolog a (C. elegans)	5.41165	4.86059	1.46516	0.607779	0.847567
ANO9	338440	anoctamin 9	7.887	7.33604	1.46506	0.0286167	0.19853
MRAP2	112609	melanocortin 2 receptor accessory protein 2	9.14088	8.58994	1.46504	0.0131966	0.128247
ATF7IP	55729	activating transcription factor 7 interacting protein	10.1707	9.61983	1.46499	0.0291452	0.200676
CCDC182	101927581	coiled-coil domain containing 182	2.93463	2.384	1.46473	0.10955	0.409414
MYL7	58498	myosin light chain 7	5.72579	5.1756	1.46429	0.541917	0.812655
KIAA1147	57189	KIAA1147	11.6133	11.0632	1.4642	0.0172544	0.149286
DIMT1	27292	DIM1 dimethyladenosine transferase 1 homolog	9.65735	9.10729	1.46414	0.0385147	0.235408
GTF2H3	2967	general transcription factor IIH subunit 3	10.7288	10.1788	1.46413	0.0256486	0.18632
ARL3	403	ADP-ribosylation factor like GTPase 3	9.5754	9.02548	1.464	0.0186797	0.155446
TPRN	286262	taperin	5.03277	4.48286	1.46399	0.0192027	0.157258
COL3A1	1281	collagen, type III, alpha 1	5.87771	5.32806	1.46373	0.658735	0.871541
CNNM2	54805	cyclin and CBS domain divalent metal cation transport mediator 2	7.84255	7.29301	1.46361	0.529716	0.806869
SRPK2	6733	SRSF protein kinase 2	6.18327	5.63375	1.4636	0.298581	0.639246
HNRNPA1	3178	heterogeneous nuclear ribonucleoprotein A1	17.3377	16.7882	1.46358	0.0380671	0.233743
TERF2	7014	telomeric repeat binding factor 2	10.3461	9.79659	1.46355	0.0136971	0.131208
EOGT	285203	EGF domain-specific O-linked N-acetylglucosamine (GlcNAc) transferase	7.86606	7.31661	1.46353	0.0182473	0.1539
CTH	1491	cystathionine gamma-lyase	6.36792	5.81866	1.46334	0.460331	0.761907
PLEC	5339	plectin	9.78019	9.23094	1.46332	0.00811277	0.0950315
NOTO	344022	notochord homeobox	4.70465	4.15541	1.46331	0.49384	0.782555
FICD	11153	FIC domain containing	4.55793	4.00883	1.46317	0.107001	0.404542
GRAMD1A	57655	GRAM domain containing 1A	6.70214	6.15311	1.46309	0.102297	0.395612
H3F3A	3020	H3 histone, family 3A	13.8523	13.3034	1.4629	0.0429934	0.249246
HSFY2	159119	heat shock transcription factor, Y-linked 2	4.03441	3.48587	1.4626	0.0291143	0.200532
CRYGN	155051	crystallin gamma N	7.64895	7.10074	1.46227	0.0323255	0.213165
EVA1A	84141	eva-1 homolog A (C. elegans)	2.65413	2.10601	1.46218	0.0417824	0.245252
PHKA1	5255	phosphorylase kinase, alpha 1 (muscle)	6.91785	6.3699	1.462	0.0648612	0.312195
STAB2	55576	stabilin 2	4.53566	3.9878	1.46191	0.567551	0.826929
ANXA11	311	annexin A11	14.1628	13.6151	1.46171	0.0108095	0.113765
SYMPK	8189	symplekin	13.2877	12.7403	1.46147	0.00702391	0.0882019
VPS37B	79720	vacuolar protein sorting 37 homolog B (S. cerevisiae)	8.63425	8.08697	1.46132	0.306001	0.646103
ANKS4B	257629	ankyrin repeat and sterile alpha motif domain containing 4B	8.18194	7.63547	1.4605	0.0300656	0.204554
SETD2	29072	SET domain containing 2	8.12679	7.58033	1.4605	0.0111876	0.116031
GPR160	26996	G protein-coupled receptor 160	10.0458	9.49938	1.46047	0.0404817	0.240224
ZNF699	374879	zinc finger protein 699	6.67623	6.1298	1.46047	0.0517445	0.276243
PLEKHA6	22874	pleckstrin homology domain containing, family A member 6	10.9051	10.3587	1.46046	0.0357322	0.226005
SPTSSA	171546	serine palmitoyltransferase, small subunit A	9.36426	8.81789	1.46041	0.042423	0.247252
TEX101	83639	testis expressed 101	5.58171	5.03541	1.46033	0.187861	0.520722
GTF2IRD1	9569	GTF2I repeat domain containing 1	9.44103	8.8948	1.46026	0.0111115	0.1156
BPY2C	442868	basic charge, Y-linked, 2C	3.33398	2.78787	1.46015	0.00436639	0.06675
FCMR	9214	Fc fragment of IgM receptor	3.6083	3.06226	1.46007	0.0390086	0.236483
OR52K2	119774	olfactory receptor, family 52, subfamily K, member 2	5.7092	5.16319	1.46004	0.253362	0.592272
HNRNPA3	220988	heterogeneous nuclear ribonucleoprotein A3	12.6555	12.1098	1.45979	0.0989675	0.388871
AFF1	4299	AF4/FMR2 family, member 1	13.1037	12.558	1.45971	0.00568472	0.0782579
DOC2A	8448	double C2-like domains, alpha	4.73044	4.18504	1.45943	0.110334	0.410912
EIF4G1	1981	eukaryotic translation initiation factor 4 gamma, 1	12.6143	12.0689	1.45943	0.0181076	0.153013
RGP1	9827	RGP1 homolog, RAB6A GEF complex partner 1	9.04351	8.4983	1.45923	0.0882161	0.366181
IMPACT	55364	impact RWD domain protein	7.95997	7.41488	1.45911	0.0201197	0.160958
SLC37A4	2542	solute carrier family 37 (glucose-6-phosphate transporter), member 4	10.1271	9.58204	1.45907	0.411826	0.729324
HEATR3	55027	HEAT repeat containing 3	10.0024	9.45757	1.45891	0.0243767	0.18135
MUC13	56667	mucin 13, cell surface associated	13.6914	13.1466	1.45878	0.0201138	0.160958
PAK4	10298	p21 protein (Cdc42/Rac)-activated kinase 4	10.4449	9.90025	1.45869	0.00737835	0.0908047
EMX2	2018	empty spiracles homeobox 2	4.17037	3.62588	1.4585	0.493752	0.782531
TRIOBP	11078	TRIO and F-actin binding protein	12.415	11.8708	1.45821	0.0102986	0.110553
TMC7	79905	transmembrane channel like 7	9.81364	9.26947	1.45819	0.031356	0.209967
LUC7L3	51747	LUC7-like 3 pre-mRNA splicing factor	13.7762	13.2322	1.45806	0.260837	0.599746
SFTPB	6439	surfactant protein B	4.53964	3.99581	1.45784	0.0430091	0.249246
AXIN1	8312	axin 1	8.34347	7.79966	1.45781	0.0473677	0.263057
PDPN	10630	podoplanin	3.39147	2.84769	1.45778	0.211528	0.547202
WLS	79971	wntless Wnt ligand secretion mediator	12.4929	11.9493	1.45764	0.0413373	0.243305
PPP1R3B	79660	protein phosphatase 1, regulatory subunit 3B	8.08525	7.54164	1.45761	0.13478	0.447493
TMA7	51372	translation machinery associated 7 homolog	9.81244	9.26887	1.45757	0.0646491	0.311784
MKL2	57496	MKL/myocardin-like 2	10.4796	9.93631	1.45726	0.0114327	0.117868
STAG3L4	64940	stromal antigen 3-like 4 (pseudogene)	8.70249	8.15952	1.45697	0.0209689	0.16474
C7orf31	136895	chromosome 7 open reading frame 31	5.35097	4.80816	1.4568	0.0455352	0.257565
RUSC2	9853	RUN and SH3 domain containing 2	3.67446	3.13179	1.45666	0.728678	0.902432
PLCL1	5334	phospholipase C-like 1	4.3232	3.78056	1.45663	0.787236	0.926743
VAMP7		Transcript Identified by AceView, Entrez Gene ID(s) 6845	4.27922	3.73699	1.45622	0.0705721	0.326003
DOCK5	80005	dedicator of cytokinesis 5	11.4722	10.93	1.4562	0.00890657	0.100647
[truncated: 19,449 more rows]
