# Supplementary material for: A novel application of hectorite nanoclay for preparation of colorectal cancer spheroids with malignant potential
Source: Royal Society of Chemistry journal article supplement (doi:10.1039/d2lc00750a), 2023-01-01
Supplement: d2lc00750a2.xlsx [file d2lc00750a2.xlsx]

## Sheet: Dataset_S2
NAME	SIZE	ES	NES	NOM p-val	FDR q-val	FWER p-val	RANK AT MAX	LEADING EDGE
GOBP_REGULATION_OF_ESTABLISHMENT_OF_PLANAR_POLARITY	53	0.583553	2.10886	0	0.0356097	0.029	3636	tags=42%, list=19%, signal=51%
GOBP_PROTEIN_DNA_COMPLEX_DISASSEMBLY	18	0.749493	2.0756	0	0.0300268	0.049	2719	tags=56%, list=14%, signal=65%
GOBP_CHROMATIN_DISASSEMBLY	19	0.729874	2.07389	0	0.0200179	0.049	2719	tags=53%, list=14%, signal=61%
GOBP_LAMELLIPODIUM_MORPHOGENESIS	16	0.765722	2.06401	0	0.0195987	0.063	1746	tags=56%, list=9%, signal=62%
GOBP_SALIVARY_GLAND_DEVELOPMENT	33	0.629432	2.0155	0	0.0387003	0.15	4017	tags=48%, list=21%, signal=61%
GOBP_SOMATIC_STEM_CELL_POPULATION_MAINTENANCE	42	0.578576	2.01418	0	0.0324563	0.151	3319	tags=45%, list=17%, signal=54%
GOBP_SEMAPHORIN_PLEXIN_SIGNALING_PATHWAY	41	0.592725	2.01339	0	0.0278196	0.151	1739	tags=37%, list=9%, signal=40%
GOBP_ESTABLISHMENT_OF_TISSUE_POLARITY	67	0.528091	2.01021	0	0.0264887	0.164	3972	tags=39%, list=20%, signal=49%
GOBP_POSITIVE_REGULATION_OF_CELLULAR_RESPONSE_TO_INSULIN_STIMULUS	21	0.691485	1.99939	0	0.0281677	0.193	2764	tags=52%, list=14%, signal=61%
GOBP_EXOCRINE_SYSTEM_DEVELOPMENT	44	0.573953	1.99459	0	0.0278081	0.209	1931	tags=27%, list=10%, signal=30%
GOBP_REGULATION_OF_HIPPO_SIGNALING	18	0.693606	1.98546	0	0.0296197	0.238	1475	tags=39%, list=8%, signal=42%
GOBP_NON_CANONICAL_WNT_SIGNALING_PATHWAY	68	0.515115	1.9802	0	0.0295043	0.257	3636	tags=38%, list=19%, signal=47%
GOBP_BRANCHING_INVOLVED_IN_SALIVARY_GLAND_MORPHOGENESIS	20	0.668352	1.96432	0	0.0342032	0.308	1931	tags=35%, list=10%, signal=39%
GOBP_AXIS_ELONGATION	27	0.63422	1.95521	0	0.0367621	0.348	2153	tags=33%, list=11%, signal=37%
GOBP_HISTONE_H3_K4_TRIMETHYLATION	20	0.67499	1.94717	0	0.0386393	0.385	4608	tags=60%, list=24%, signal=79%
GOBP_NEURAL_CREST_CELL_DIFFERENTIATION	93	0.481536	1.91991	0	0.0518315	0.505	2899	tags=30%, list=15%, signal=35%
GOBP_REGULATION_OF_CELLULAR_RESPONSE_TO_INSULIN_STIMULUS	55	0.52605	1.91694	0	0.0503812	0.517	2924	tags=47%, list=15%, signal=56%
GOBP_CLATHRIN_DEPENDENT_ENDOCYTOSIS	45	0.543816	1.90619	0	0.0553564	0.568	2732	tags=38%, list=14%, signal=44%
GOBP_SEMAPHORIN_PLEXIN_SIGNALING_PATHWAY_INVOLVED_IN_NEURON_PROJECTION_GUIDANCE	16	0.693301	1.89695	0	0.0599281	0.612	425	tags=38%, list=2%, signal=38%
GOBP_INNER_EAR_MORPHOGENESIS	98	0.468404	1.88806	0	0.065084	0.663	2290	tags=22%, list=12%, signal=25%
GOBP_NEGATIVE_REGULATION_OF_STEM_CELL_DIFFERENTIATION	22	0.639754	1.88619	0	0.0635594	0.671	3256	tags=59%, list=17%, signal=71%
GOBP_VESICLE_MEDIATED_TRANSPORT_TO_THE_PLASMA_MEMBRANE	119	0.445456	1.88505	0	0.0613346	0.673	3031	tags=29%, list=16%, signal=35%
GOBP_MESENCHYMAL_CELL_DEVELOPMENT	86	0.47305	1.88498	0	0.0587732	0.675	2899	tags=30%, list=15%, signal=35%
GOBP_MONOVALENT_INORGANIC_ANION_HOMEOSTASIS	15	0.703541	1.88017	0.00210084	0.0599534	0.698	2329	tags=53%, list=12%, signal=61%
GOBP_REGULATION_OF_AXONOGENESIS	142	0.435276	1.87766	0	0.0593663	0.71	1751	tags=23%, list=9%, signal=25%
GOBP_STEM_CELL_DIFFERENTIATION	204	0.416091	1.87297	0	0.0598596	0.73	3277	tags=31%, list=17%, signal=37%
GOBP_MORPHOGENESIS_OF_A_POLARIZED_EPITHELIUM	88	0.462316	1.85621	0	0.0708718	0.8	3027	tags=31%, list=16%, signal=36%
GOBP_EMBRYONIC_ORGAN_MORPHOGENESIS	282	0.397798	1.85526	0	0.0691272	0.803	2947	tags=26%, list=15%, signal=30%
GOBP_RHO_PROTEIN_SIGNAL_TRANSDUCTION	128	0.438267	1.85488	0	0.0668283	0.804	2770	tags=27%, list=14%, signal=31%
GOBP_LUNG_MORPHOGENESIS	49	0.516554	1.8536	0.00226244	0.0658684	0.811	2155	tags=29%, list=11%, signal=32%
GOBP_PROTEIN_LOCALIZATION_TO_PLASMA_MEMBRANE	262	0.396567	1.85243	0	0.0643756	0.814	3079	tags=31%, list=16%, signal=36%
GOBP_POSITIVE_REGULATION_OF_GLUCONEOGENESIS	16	0.67078	1.85217	0.00194932	0.062711	0.815	4559	tags=50%, list=23%, signal=65%
GOBP_POSITIVE_REGULATION_OF_COLLAGEN_METABOLIC_PROCESS	23	0.610725	1.84303	0.00197628	0.0683208	0.854	44	tags=13%, list=0%, signal=13%
GOBP_VESICLE_CYTOSKELETAL_TRAFFICKING	61	0.49342	1.84105	0	0.0679239	0.857	2586	tags=34%, list=13%, signal=40%
GOBP_NEURAL_CREST_CELL_MIGRATION	58	0.505214	1.8381	0	0.0682663	0.865	2899	tags=34%, list=15%, signal=40%
GOBP_REGULATION_OF_WNT_SIGNALING_PATHWAY_PLANAR_CELL_POLARITY_PATHWAY	15	0.695802	1.83571	0.00202429	0.0684467	0.872	2981	tags=53%, list=15%, signal=63%
GOBP_ACTIN_FILAMENT_BASED_TRANSPORT	21	0.629554	1.83016	0.00610998	0.0715695	0.885	2586	tags=52%, list=13%, signal=60%
GOBP_EPITHELIAL_TUBE_BRANCHING_INVOLVED_IN_LUNG_MORPHOGENESIS	28	0.579777	1.82748	0.00646552	0.0719415	0.891	2155	tags=32%, list=11%, signal=36%
GOBP_VESICLE_MEDIATED_TRANSPORT_BETWEEN_ENDOSOMAL_COMPARTMENTS	41	0.540027	1.82738	0.00232019	0.0702212	0.891	2094	tags=32%, list=11%, signal=35%
GOBP_REGULATION_OF_HISTONE_H3_K4_METHYLATION	34	0.548558	1.82515	0	0.0703679	0.896	4682	tags=50%, list=24%, signal=66%
GOBP_HEMATOPOIETIC_STEM_CELL_HOMEOSTASIS	16	0.65666	1.82079	0.0041841	0.0719148	0.902	4026	tags=63%, list=21%, signal=79%
GOBP_ALTERNATIVE_MRNA_SPLICING_VIA_SPLICEOSOME	67	0.473597	1.81727	0.00233645	0.0729548	0.912	4201	tags=42%, list=22%, signal=53%
GOBP_STRESS_GRANULE_ASSEMBLY	26	0.587601	1.81464	0	0.0731614	0.921	4237	tags=50%, list=22%, signal=64%
GOBP_ENDOCYTIC_RECYCLING	63	0.483137	1.81286	0	0.0731406	0.924	6515	tags=60%, list=34%, signal=91%
GOBP_RESPONSE_TO_RETINOIC_ACID	106	0.432957	1.81189	0	0.0726087	0.928	3093	tags=26%, list=16%, signal=31%
GOBP_RESPONSE_TO_MAGNESIUM_ION	19	0.643439	1.80965	0	0.0727129	0.931	1703	tags=42%, list=9%, signal=46%
GOBP_POSITIVE_REGULATION_OF_SODIUM_ION_TRANSMEMBRANE_TRANSPORTER_ACTIVITY	16	0.65428	1.80957	0.00613497	0.0711917	0.931	3377	tags=50%, list=17%, signal=60%
GOBP_MAINTENANCE_OF_CELL_NUMBER	132	0.425728	1.8095	0	0.0697603	0.931	4475	tags=43%, list=23%, signal=56%
GOBP_REGULATION_OF_FILOPODIUM_ASSEMBLY	44	0.521209	1.80643	0.00238095	0.0707655	0.933	3928	tags=55%, list=20%, signal=68%
GOBP_TUBE_FORMATION	146	0.419795	1.79894	0	0.0756488	0.947	2940	tags=32%, list=15%, signal=37%
GOBP_RESPONSE_TO_TRANSFORMING_GROWTH_FACTOR_BETA	235	0.395056	1.79669	0	0.0764018	0.952	2192	tags=25%, list=11%, signal=28%
GOBP_APOPTOTIC_DNA_FRAGMENTATION	16	0.659669	1.79372	0.00423729	0.0774273	0.955	4305	tags=63%, list=22%, signal=80%
GOBP_REGULATION_OF_SMALL_GTPASE_MEDIATED_SIGNAL_TRANSDUCTION	274	0.383335	1.79248	0	0.0769607	0.955	3487	tags=30%, list=18%, signal=36%
GOBP_HIPPO_SIGNALING	35	0.546027	1.79235	0.00207469	0.0757609	0.955	2184	tags=34%, list=11%, signal=39%
GOBP_REGULATION_OF_ALTERNATIVE_MRNA_SPLICING_VIA_SPLICEOSOME	54	0.498063	1.79229	0	0.0743834	0.955	4201	tags=43%, list=22%, signal=54%
GOBP_COCHLEA_MORPHOGENESIS	23	0.599277	1.78204	0.0020284	0.0821498	0.972	452	tags=13%, list=2%, signal=13%
GOBP_DNA_CATABOLIC_PROCESS_ENDONUCLEOLYTIC	23	0.59879	1.78021	0	0.0826461	0.973	5222	tags=65%, list=27%, signal=89%
GOBP_REGULATION_OF_CELL_FATE_COMMITMENT	25	0.585942	1.77918	0	0.0821537	0.975	923	tags=20%, list=5%, signal=21%
GOBP_REGULATION_OF_EARLY_ENDOSOME_TO_LATE_ENDOSOME_TRANSPORT	17	0.643849	1.77851	0.00438597	0.0813004	0.976	2804	tags=41%, list=14%, signal=48%
GOBP_PROTEIN_LOCALIZATION_TO_LYSOSOME	38	0.531628	1.77787	0.00475059	0.0803532	0.976	1478	tags=24%, list=8%, signal=26%
GOBP_REGULATION_OF_PROTEIN_LOCALIZATION_TO_PLASMA_MEMBRANE	96	0.438825	1.7773	0	0.0794997	0.977	2641	tags=33%, list=14%, signal=38%
GOBP_PROTEIN_LOCALIZATION_TO_CELL_CELL_JUNCTION	21	0.605238	1.77598	0.00623701	0.0793012	0.98	3203	tags=48%, list=17%, signal=57%
GOBP_FACULTATIVE_HETEROCHROMATIN_ASSEMBLY	29	0.55327	1.77553	0.00226757	0.0784535	0.98	3116	tags=45%, list=16%, signal=53%
GOBP_TRANSFORMING_GROWTH_FACTOR_BETA_RECEPTOR_SIGNALING_PATHWAY	182	0.402261	1.76995	0	0.0828577	0.987	2192	tags=26%, list=11%, signal=29%
GOBP_OLFACTORY_LOBE_DEVELOPMENT	33	0.529232	1.76844	0.00684931	0.0828086	0.987	5695	tags=55%, list=29%, signal=77%
GOBP_APPENDAGE_DEVELOPMENT	169	0.403759	1.76837	0	0.0815912	0.987	4027	tags=36%, list=21%, signal=44%
GOBP_CELLULAR_RESPONSE_TO_RETINOIC_ACID	65	0.468161	1.76762	0.0023753	0.0809625	0.987	3093	tags=25%, list=16%, signal=29%
GOBP_NEGATIVE_REGULATION_OF_EXECUTION_PHASE_OF_APOPTOSIS	19	0.630562	1.76639	0.00619835	0.0807101	0.988	4804	tags=58%, list=25%, signal=77%
GOBP_O_GLYCAN_PROCESSING	39	0.522921	1.76627	0	0.0795931	0.988	1865	tags=31%, list=10%, signal=34%
GOBP_REGULATION_OF_RHO_PROTEIN_SIGNAL_TRANSDUCTION	79	0.441685	1.76149	0	0.0820775	0.99	2754	tags=25%, list=14%, signal=29%
GOBP_POSITIVE_REGULATION_OF_SODIUM_ION_TRANSPORT	32	0.547073	1.75915	0.0021322	0.0832215	0.991	3377	tags=38%, list=17%, signal=45%
GOBP_REGULATION_OF_EXOSOMAL_SECRETION	17	0.634905	1.75806	0.00821355	0.0831558	0.991	1903	tags=35%, list=10%, signal=39%
GOBP_GLYCOSAMINOGLYCAN_CATABOLIC_PROCESS	24	0.577514	1.75639	0.00441501	0.0832654	0.991	1952	tags=29%, list=10%, signal=32%
GOBP_REGULATION_OF_INSULIN_RECEPTOR_SIGNALING_PATHWAY	58	0.472513	1.75575	0	0.0828366	0.991	2924	tags=43%, list=15%, signal=51%
GOBP_POSITIVE_REGULATION_OF_AXONOGENESIS	72	0.454528	1.75565	0	0.0817974	0.991	2969	tags=28%, list=15%, signal=33%
GOBP_ADHERENS_JUNCTION_ORGANIZATION	49	0.504632	1.75564	0.00222717	0.0807211	0.991	3636	tags=47%, list=19%, signal=58%
GOBP_MORPHOGENESIS_OF_AN_EPITHELIUM	486	0.356301	1.75474	0	0.0806283	0.992	2278	tags=21%, list=12%, signal=24%
GOBP_NEURAL_TUBE_FORMATION	100	0.434333	1.75075	0	0.0835357	0.992	2940	tags=37%, list=15%, signal=43%
GOBP_INTRACELLULAR_ESTROGEN_RECEPTOR_SIGNALING_PATHWAY	44	0.502574	1.74985	0.00215054	0.0830813	0.992	3588	tags=32%, list=18%, signal=39%
GOBP_EMBRYONIC_SKELETAL_SYSTEM_MORPHOGENESIS	89	0.441589	1.74929	0	0.0826227	0.992	3999	tags=38%, list=21%, signal=48%
GOBP_NEURAL_TUBE_DEVELOPMENT	147	0.411266	1.7418	0	0.0881321	0.995	2940	tags=33%, list=15%, signal=39%
GOBP_APICAL_JUNCTION_ASSEMBLY	73	0.443645	1.73955	0	0.0888339	0.995	1971	tags=25%, list=10%, signal=27%
GOBP_REGULATION_OF_RAS_PROTEIN_SIGNAL_TRANSDUCTION	170	0.390239	1.73233	0	0.0951176	0.995	3982	tags=32%, list=21%, signal=40%
GOBP_EAR_MORPHOGENESIS	118	0.413278	1.72518	0	0.100889	0.998	3036	tags=26%, list=16%, signal=31%
GOBP_EPITHELIAL_TUBE_FORMATION	132	0.409831	1.72495	0	0.0998034	0.998	2940	tags=32%, list=15%, signal=37%
GOBP_REGULATION_OF_EXECUTION_PHASE_OF_APOPTOSIS	26	0.560579	1.72435	0.00215054	0.0993548	0.998	4804	tags=54%, list=25%, signal=71%
GOBP_REGULATION_OF_GENE_EXPRESSION_EPIGENETIC	112	0.415757	1.72373	0	0.0987482	0.998	3116	tags=32%, list=16%, signal=38%
GOBP_ENDODERMAL_CELL_DIFFERENTIATION	43	0.496525	1.72281	0.00230415	0.0987426	0.999	1701	tags=23%, list=9%, signal=25%
GOBP_PEPTIDYL_LYSINE_ACETYLATION	170	0.394364	1.71683	0	0.10342	0.999	3024	tags=32%, list=16%, signal=37%
GOBP_NEGATIVE_REGULATION_OF_AXON_EXTENSION_INVOLVED_IN_AXON_GUIDANCE	25	0.567964	1.71572	0.00451467	0.103468	0.999	1739	tags=32%, list=9%, signal=35%
GOBP_REGULATION_OF_PROTEIN_LOCALIZATION_TO_CELL_SURFACE	37	0.502925	1.71417	0.00444444	0.103799	0.999	2998	tags=41%, list=15%, signal=48%
GOBP_SMALL_GTPASE_MEDIATED_SIGNAL_TRANSDUCTION	468	0.345948	1.71407	0	0.102857	0.999	3487	tags=29%, list=18%, signal=34%
GOBP_APPENDAGE_MORPHOGENESIS	134	0.401217	1.71344	0	0.102501	0.999	4027	tags=34%, list=21%, signal=42%
GOBP_VESICLE_DOCKING_INVOLVED_IN_EXOCYTOSIS	36	0.512315	1.71104	0.0135747	0.104057	0.999	971	tags=19%, list=5%, signal=20%
GOBP_NEGATIVE_REGULATION_OF_NEURON_PROJECTION_DEVELOPMENT	122	0.403102	1.7084	0	0.105944	0.999	3230	tags=30%, list=17%, signal=35%
GOBP_INSULIN_RECEPTOR_SIGNALING_PATHWAY	107	0.412779	1.70803	0	0.105172	0.999	3547	tags=41%, list=18%, signal=50%
GOBP_FILOPODIUM_ASSEMBLY	60	0.46092	1.7075	0	0.104619	0.999	3928	tags=45%, list=20%, signal=56%
GOBP_G1_TO_G0_TRANSITION	17	0.61414	1.70639	0.00968992	0.104865	0.999	5193	tags=53%, list=27%, signal=72%
GOBP_REGULATION_OF_AUTOPHAGY_OF_MITOCHONDRION	33	0.528241	1.70468	0.0045045	0.105504	0.999	3404	tags=48%, list=18%, signal=59%
GOBP_GLANDULAR_EPITHELIAL_CELL_DEVELOPMENT	28	0.544833	1.70285	0.01	0.106657	0.999	2709	tags=32%, list=14%, signal=37%
GOBP_HISTONE_H3_K4_METHYLATION	62	0.461909	1.70158	0.00228311	0.10684	0.999	4682	tags=45%, list=24%, signal=59%
GOBP_BRANCHED_CHAIN_AMINO_ACID_CATABOLIC_PROCESS	21	0.579891	1.69651	0.0104384	0.111182	1	4353	tags=62%, list=22%, signal=80%
GOBP_LAMELLIPODIUM_ORGANIZATION	81	0.426627	1.6953	0	0.111494	1	1746	tags=23%, list=9%, signal=26%
GOBP_TRANSMEMBRANE_RECEPTOR_PROTEIN_SERINE_THREONINE_KINASE_SIGNALING_PATHWAY	331	0.357648	1.69498	0	0.110776	1	2940	tags=26%, list=15%, signal=30%
GOBP_NEGATIVE_REGULATION_OF_CELLULAR_SENESCENCE	17	0.613984	1.6943	0.0133929	0.11055	1	2778	tags=41%, list=14%, signal=48%
GOBP_REGULATION_OF_ACTIN_NUCLEATION	27	0.548391	1.69284	0.00898876	0.111099	1	2580	tags=37%, list=13%, signal=43%
GOBP_REGULATION_OF_GTPASE_ACTIVITY	316	0.359546	1.69253	0	0.110336	1	3665	tags=33%, list=19%, signal=40%
GOBP_REGULATION_OF_CYTOPLASMIC_TRANSPORT	25	0.547418	1.69063	0.00424628	0.111199	1	2804	tags=36%, list=14%, signal=42%
GOBP_ESTABLISHMENT_OF_EPITHELIAL_CELL_POLARITY	30	0.525876	1.69046	0.0110865	0.110336	1	1089	tags=23%, list=6%, signal=25%
GOBP_REGULATION_OF_PROTEIN_LOCALIZATION_TO_MEMBRANE	160	0.389813	1.68797	0	0.111896	1	3855	tags=34%, list=20%, signal=43%
GOBP_REGULATION_OF_GLUCONEOGENESIS	44	0.484705	1.68668	0.00665188	0.112365	1	3666	tags=34%, list=19%, signal=42%
GOBP_REGULATION_OF_INTRACELLULAR_ESTROGEN_RECEPTOR_SIGNALING_PATHWAY	29	0.526948	1.68445	0.00862069	0.113936	1	1804	tags=24%, list=9%, signal=27%
GOBP_AXON_DEVELOPMENT	450	0.341947	1.68408	0	0.113329	1	2538	tags=20%, list=13%, signal=23%
GOBP_POSITIVE_REGULATION_OF_SODIUM_ION_TRANSMEMBRANE_TRANSPORT	20	0.592452	1.6839	0	0.112529	1	3377	tags=40%, list=17%, signal=48%
GOBP_REGULATION_OF_CELL_SHAPE	141	0.397167	1.68362	0	0.111772	1	3782	tags=35%, list=19%, signal=44%
GOBP_BRANCH_ELONGATION_OF_AN_EPITHELIUM	18	0.59532	1.68224	0.0274262	0.1123	1	707	tags=22%, list=4%, signal=23%
GOBP_REGULATION_OF_LIPID_KINASE_ACTIVITY	64	0.445029	1.67951	0.00238663	0.11422	1	5494	tags=47%, list=28%, signal=65%
GOBP_REGULATION_OF_PROTEIN_LOCALIZATION_TO_CELL_PERIPHERY	116	0.404523	1.67799	0	0.114829	1	2641	tags=33%, list=14%, signal=38%
GOBP_SYNAPTIC_VESICLE_RECYCLING	71	0.434558	1.67589	0	0.116012	1	3739	tags=37%, list=19%, signal=45%
GOBP_CHROMATIN_REMODELING	185	0.376909	1.67462	0	0.116248	1	3000	tags=31%, list=15%, signal=36%
GOBP_EPITHELIAL_CELL_MATURATION	15	0.621571	1.67209	0.00642398	0.118083	1	2524	tags=47%, list=13%, signal=54%
GOBP_POSITIVE_REGULATION_OF_SMALL_GTPASE_MEDIATED_SIGNAL_TRANSDUCTION	65	0.446875	1.67207	0.00476191	0.117135	1	2687	tags=23%, list=14%, signal=27%
GOBP_DEVELOPMENTAL_GROWTH_INVOLVED_IN_MORPHOGENESIS	217	0.371901	1.6718	0	0.116434	1	2777	tags=24%, list=14%, signal=28%
GOBP_FC_GAMMA_RECEPTOR_SIGNALING_PATHWAY	29	0.526848	1.66846	0.00655022	0.119032	1	3800	tags=41%, list=20%, signal=51%
GOBP_CELL_CELL_JUNCTION_ORGANIZATION	194	0.371255	1.66738	0	0.119423	1	1971	tags=22%, list=10%, signal=24%
GOBP_REGULATION_OF_CELL_SIZE	165	0.373256	1.66657	0	0.119351	1	1751	tags=19%, list=9%, signal=20%
GOBP_PROTEIN_LOCALIZATION_TO_CELL_PERIPHERY	315	0.35119	1.66526	0	0.119879	1	3079	tags=29%, list=16%, signal=34%
GOBP_DNA_METHYLATION_DEPENDENT_HETEROCHROMATIN_ASSEMBLY	22	0.565282	1.66459	0.0153173	0.119687	1	3116	tags=45%, list=16%, signal=54%
GOBP_CELL_JUNCTION_DISASSEMBLY	21	0.564262	1.66455	0.0207469	0.118806	1	3982	tags=38%, list=21%, signal=48%
GOBP_CHROMATIN_ORGANIZATION	467	0.338862	1.6642	0	0.118271	1	3000	tags=27%, list=15%, signal=31%
GOBP_OUTFLOW_TRACT_SEPTUM_MORPHOGENESIS	25	0.541186	1.66408	0.0103093	0.117564	1	6680	tags=64%, list=34%, signal=97%
GOBP_CELL_CELL_SIGNALING_BY_WNT	411	0.342507	1.66282	0	0.11804	1	3027	tags=25%, list=16%, signal=29%
GOBP_AXONAL_FASCICULATION	22	0.562413	1.66214	0.0159091	0.117814	1	296	tags=14%, list=2%, signal=14%
GOBP_POSITIVE_REGULATION_OF_PHOSPHATIDYLINOSITOL_3_KINASE_SIGNALING	74	0.432966	1.66173	0.00243902	0.117347	1	2777	tags=24%, list=14%, signal=28%
GOBP_BRANCHED_CHAIN_AMINO_ACID_METABOLIC_PROCESS	25	0.539941	1.65951	0.00647948	0.119076	1	4473	tags=60%, list=23%, signal=78%
GOBP_AORTA_DEVELOPMENT	56	0.449336	1.65874	0.00446429	0.118951	1	1432	tags=20%, list=7%, signal=21%
GOBP_NEGATIVE_REGULATION_OF_DEPHOSPHORYLATION	43	0.475745	1.65757	0.00678733	0.11912	1	3632	tags=40%, list=19%, signal=49%
GOBP_SENSORY_SYSTEM_DEVELOPMENT	372	0.344664	1.65725	0	0.118605	1	3770	tags=27%, list=19%, signal=33%
GOBP_COLUMNAR_CUBOIDAL_EPITHELIAL_CELL_DEVELOPMENT	42	0.483181	1.65546	0.00896861	0.119753	1	3049	tags=31%, list=16%, signal=37%
GOBP_CARDIAC_RIGHT_VENTRICLE_MORPHOGENESIS	19	0.577054	1.65531	0.0124224	0.11901	1	5442	tags=58%, list=28%, signal=80%
GOBP_POSITIVE_REGULATION_OF_PROTEIN_LOCALIZATION_TO_MEMBRANE	95	0.405393	1.65366	0.00243309	0.119755	1	3508	tags=32%, list=18%, signal=38%
GOBP_MORPHOGENESIS_OF_EMBRYONIC_EPITHELIUM	144	0.383552	1.6535	0	0.119084	1	2940	tags=28%, list=15%, signal=33%
GOBP_REGULATION_OF_CELLULAR_RESPONSE_TO_TRANSFORMING_GROWTH_FACTOR_BETA_STIMULUS	120	0.390345	1.65274	0	0.11898	1	2192	tags=27%, list=11%, signal=30%
GOBP_PROTEIN_ACETYLATION	194	0.365291	1.65265	0	0.118205	1	3024	tags=29%, list=16%, signal=34%
GOBP_RAS_PROTEIN_SIGNAL_TRANSDUCTION	322	0.348361	1.65254	0	0.117524	1	2770	tags=25%, list=14%, signal=28%
GOBP_DEFINITIVE_HEMOPOIESIS	17	0.598883	1.65138	0.0105932	0.118092	1	402	tags=29%, list=2%, signal=30%
GOBP_POSITIVE_REGULATION_OF_G_PROTEIN_COUPLED_RECEPTOR_SIGNALING_PATHWAY	25	0.533669	1.65105	0.0108696	0.117631	1	3668	tags=32%, list=19%, signal=39%
GOBP_N_TERMINAL_PROTEIN_AMINO_ACID_ACETYLATION	15	0.602074	1.65004	0.0257426	0.117817	1	1326	tags=27%, list=7%, signal=29%
GOBP_REGULATION_OF_EXOCYTOSIS	195	0.361995	1.64985	0	0.117247	1	3739	tags=28%, list=19%, signal=35%
GOBP_MORPHOGENESIS_OF_A_BRANCHING_STRUCTURE	192	0.369287	1.64959	0	0.116727	1	2969	tags=26%, list=15%, signal=30%
GOBP_ENDOPLASMIC_RETICULUM_CALCIUM_ION_HOMEOSTASIS	24	0.559915	1.64825	0.00856531	0.117431	1	1696	tags=29%, list=9%, signal=32%
GOBP_EMBRYONIC_APPENDAGE_MORPHOGENESIS	113	0.392261	1.64781	0	0.11707	1	4305	tags=35%, list=22%, signal=45%
GOBP_NEGATIVE_REGULATION_OF_PROTEIN_DEPHOSPHORYLATION	32	0.514673	1.64712	0	0.116987	1	2523	tags=38%, list=13%, signal=43%
GOBP_SUBSTRATE_ADHESION_DEPENDENT_CELL_SPREADING	101	0.399901	1.64706	0	0.116306	1	1981	tags=25%, list=10%, signal=27%
GOBP_CRANIAL_NERVE_DEVELOPMENT	53	0.454155	1.64626	0.00454545	0.116395	1	2753	tags=23%, list=14%, signal=26%
GOBP_STARTLE_RESPONSE	22	0.561681	1.64593	0.0198676	0.115978	1	5140	tags=45%, list=26%, signal=62%
GOBP_REGULATION_OF_B_CELL_DIFFERENTIATION	28	0.527494	1.64516	0.00619835	0.116051	1	4469	tags=43%, list=23%, signal=56%
GOBP_MESENCHYME_DEVELOPMENT	273	0.35458	1.64442	0	0.116017	1	3641	tags=28%, list=19%, signal=34%
GOBP_PROTEIN_LOCALIZATION_TO_CELL_SURFACE	64	0.435232	1.64265	0	0.117033	1	3589	tags=33%, list=18%, signal=40%
GOBP_CHONDROCYTE_DIFFERENTIATION_INVOLVED_IN_ENDOCHONDRAL_BONE_MORPHOGENESIS	15	0.622339	1.64204	0.00614754	0.116949	1	1975	tags=53%, list=10%, signal=59%
GOBP_MESENCHYMAL_CELL_DIFFERENTIATION	222	0.357669	1.64039	0	0.117722	1	4127	tags=33%, list=21%, signal=42%
GOBP_POSITIVE_REGULATION_OF_NON_CANONICAL_WNT_SIGNALING_PATHWAY	15	0.609427	1.63714	0.0165631	0.120509	1	2981	tags=47%, list=15%, signal=55%
GOBP_COLLAGEN_BIOSYNTHETIC_PROCESS	40	0.477745	1.63638	0.00428265	0.120635	1	3980	tags=33%, list=21%, signal=41%
GOBP_MORPHOGENESIS_OF_AN_EPITHELIAL_SHEET	50	0.456885	1.63575	0.00444444	0.120616	1	3277	tags=36%, list=17%, signal=43%
GOBP_HISTONE_H3_ACETYLATION	70	0.427518	1.63575	0	0.119893	1	2830	tags=33%, list=15%, signal=38%
GOBP_REGULATION_OF_PHOSPHATIDYLINOSITOL_3_KINASE_ACTIVITY	52	0.45643	1.63466	0	0.120323	1	3097	tags=33%, list=16%, signal=39%
GOBP_NEGATIVE_REGULATION_OF_CELL_AGING	22	0.571454	1.63364	0.012987	0.120556	1	2778	tags=41%, list=14%, signal=48%
GOBP_CARDIAC_SEPTUM_DEVELOPMENT	98	0.406198	1.63284	0	0.120562	1	2683	tags=23%, list=14%, signal=27%
GOBP_CELL_FATE_COMMITMENT_INVOLVED_IN_FORMATION_OF_PRIMARY_GERM_LAYER	32	0.505312	1.63148	0.0105485	0.121294	1	1397	tags=25%, list=7%, signal=27%
GOBP_DNA_TEMPLATED_TRANSCRIPTION_INITIATION	105	0.398291	1.62808	0	0.123948	1	2952	tags=33%, list=15%, signal=39%
GOBP_REGULATION_OF_MACROPHAGE_DIFFERENTIATION	22	0.559643	1.62792	0.00814664	0.123359	1	1564	tags=41%, list=8%, signal=44%
GOBP_FATTY_ACYL_COA_BIOSYNTHETIC_PROCESS	21	0.557771	1.62713	0.0150215	0.123526	1	2925	tags=38%, list=15%, signal=45%
GOBP_POSITIVE_REGULATION_OF_PROTEIN_TARGETING_TO_MEMBRANE	28	0.517821	1.62676	0.0147368	0.12313	1	986	tags=25%, list=5%, signal=26%
GOBP_POSITIVE_REGULATION_OF_EXOCYTOSIS	82	0.421424	1.62662	0.002457	0.122585	1	2205	tags=23%, list=11%, signal=26%
GOBP_SERINE_FAMILY_AMINO_ACID_BIOSYNTHETIC_PROCESS	15	0.60784	1.62436	0.016632	0.124314	1	2604	tags=33%, list=13%, signal=38%
GOBP_POSITIVE_REGULATION_OF_HISTONE_H3_K4_METHYLATION	23	0.542988	1.62428	0.0180361	0.123719	1	4280	tags=48%, list=22%, signal=61%
GOBP_TIGHT_JUNCTION_ORGANIZATION	78	0.415113	1.62373	0.00740741	0.123581	1	1971	tags=24%, list=10%, signal=27%
GOBP_EPITHELIAL_TUBE_MORPHOGENESIS	313	0.345277	1.6236	0	0.122977	1	2969	tags=26%, list=15%, signal=30%
GOBP_REGULATION_OF_NEURON_PROJECTION_DEVELOPMENT	397	0.333192	1.62087	0	0.125185	1	3277	tags=25%, list=17%, signal=30%
GOBP_ANTERIOR_POSTERIOR_PATTERN_SPECIFICATION	198	0.360132	1.61937	0	0.125974	1	3890	tags=33%, list=20%, signal=41%
GOBP_CELL_CELL_JUNCTION_ASSEMBLY	144	0.374384	1.61517	0	0.130071	1	1971	tags=22%, list=10%, signal=25%
GOBP_POSITIVE_REGULATION_OF_CARBOHYDRATE_METABOLIC_PROCESS	70	0.428465	1.61511	0.0112867	0.129437	1	2764	tags=27%, list=14%, signal=32%
GOBP_REGULATION_OF_ENDOCYTIC_RECYCLING	16	0.594937	1.61465	0.0250482	0.129179	1	1589	tags=31%, list=8%, signal=34%
GOBP_REGULATION_OF_MRNA_PROCESSING	126	0.3846	1.61464	0.00247525	0.128477	1	5332	tags=42%, list=27%, signal=58%
GOBP_CELLULAR_GLUCOSE_HOMEOSTASIS	132	0.380959	1.61445	0	0.127981	1	2502	tags=26%, list=13%, signal=29%
GOBP_REGULATION_OF_FATTY_ACID_BETA_OXIDATION	18	0.581083	1.61383	0.0143443	0.127983	1	2778	tags=50%, list=14%, signal=58%
GOBP_NEURON_PROJECTION_GUIDANCE	227	0.356091	1.61296	0	0.128221	1	2405	tags=21%, list=12%, signal=24%
GOBP_MITOCHONDRIAL_CALCIUM_ION_HOMEOSTASIS	22	0.540398	1.61154	0.018711	0.129034	1	3173	tags=32%, list=16%, signal=38%
GOBP_REGULATION_OF_NON_CANONICAL_WNT_SIGNALING_PATHWAY	25	0.521655	1.60977	0.0194384	0.130197	1	2981	tags=36%, list=15%, signal=42%
GOBP_NEGATIVE_REGULATION_OF_INTRACELLULAR_STEROID_HORMONE_RECEPTOR_SIGNALING_PATHWAY	31	0.503544	1.60897	0.0296804	0.130549	1	3256	tags=32%, list=17%, signal=39%
GOBP_GASTRULATION_WITH_MOUTH_FORMING_SECOND	24	0.522422	1.60866	0.0164609	0.130264	1	4696	tags=46%, list=24%, signal=60%
GOBP_MATING_BEHAVIOR	19	0.558458	1.60799	0.0170576	0.130389	1	2921	tags=32%, list=15%, signal=37%
GOBP_CELL_JUNCTION_ASSEMBLY	397	0.330007	1.60754	0	0.130215	1	3636	tags=27%, list=19%, signal=33%
GOBP_NEGATIVE_REGULATION_OF_PHOSPHOPROTEIN_PHOSPHATASE_ACTIVITY	24	0.528148	1.60622	0.034632	0.130953	1	1859	tags=38%, list=10%, signal=41%
GOBP_NEGATIVE_REGULATION_OF_AXON_EXTENSION	41	0.469278	1.60609	0.0109409	0.130434	1	1739	tags=24%, list=9%, signal=27%
GOBP_HISTONE_MODIFICATION	452	0.327619	1.60526	0	0.130766	1	2981	tags=27%, list=15%, signal=31%
GOBP_GROOMING_BEHAVIOR	18	0.570067	1.60462	0.0185185	0.130855	1	2837	tags=28%, list=15%, signal=33%
GOBP_EXOCYTOSIS	340	0.337158	1.60442	0	0.130367	1	3792	tags=27%, list=20%, signal=33%
GOBP_MACROMOLECULE_DEACYLATION	126	0.379649	1.60378	0	0.130327	1	3644	tags=33%, list=19%, signal=40%
GOBP_POSITIVE_REGULATION_BY_HOST_OF_VIRAL_TRANSCRIPTION	16	0.591925	1.60339	0.0214133	0.130098	1	2196	tags=31%, list=11%, signal=35%
GOBP_REGULATION_OF_MRNA_METABOLIC_PROCESS	256	0.348145	1.60333	0	0.129505	1	4798	tags=36%, list=25%, signal=48%
GOBP_CELL_PROLIFERATION_INVOLVED_IN_HEART_MORPHOGENESIS	20	0.557295	1.60136	0.0246407	0.130878	1	2346	tags=35%, list=12%, signal=40%
GOBP_CANONICAL_WNT_SIGNALING_PATHWAY	284	0.343034	1.60074	0	0.13088	1	3027	tags=26%, list=16%, signal=30%
GOBP_CELL_SUBSTRATE_ADHESION	330	0.338867	1.60017	0	0.130895	1	2871	tags=24%, list=15%, signal=28%
GOBP_MRNA_TRANSCRIPTION	40	0.479443	1.59944	0.00829876	0.131066	1	2830	tags=30%, list=15%, signal=35%
GOBP_REGULATION_OF_CELL_MORPHOGENESIS	279	0.348936	1.59801	0	0.132208	1	3782	tags=31%, list=19%, signal=38%
GOBP_SKELETAL_SYSTEM_MORPHOGENESIS	212	0.348546	1.59649	0	0.133261	1	4026	tags=33%, list=21%, signal=41%
GOBP_MAMMARY_GLAND_EPITHELIUM_DEVELOPMENT	66	0.42541	1.59583	0.013986	0.133326	1	3256	tags=35%, list=17%, signal=42%
GOBP_POSITIVE_REGULATION_OF_GTPASE_ACTIVITY	237	0.345663	1.59506	0	0.133585	1	3782	tags=32%, list=19%, signal=40%
GOBP_ACTIN_FILAMENT_BASED_MOVEMENT	125	0.376869	1.59482	0.00235849	0.133222	1	2586	tags=29%, list=13%, signal=33%
GOBP_GOLGI_TO_PLASMA_MEMBRANE_TRANSPORT	53	0.436508	1.59481	0.0117371	0.132591	1	3031	tags=30%, list=16%, signal=36%
GOBP_REGULATION_OF_EXTENT_OF_CELL_GROWTH	98	0.393345	1.59439	0.00761421	0.132509	1	1751	tags=21%, list=9%, signal=23%
GOBP_AROMATIC_AMINO_ACID_FAMILY_CATABOLIC_PROCESS	15	0.590945	1.59421	0.0233546	0.132053	1	2877	tags=40%, list=15%, signal=47%
GOBP_NEGATIVE_REGULATION_OF_CHEMOTAXIS	56	0.437466	1.59397	0.00683371	0.131717	1	2969	tags=30%, list=15%, signal=36%
GOBP_REGULATION_OF_STEM_CELL_POPULATION_MAINTENANCE	31	0.497645	1.59391	0.0166667	0.131156	1	3488	tags=48%, list=18%, signal=59%
GOBP_PEPTIDYL_THREONINE_MODIFICATION	113	0.382769	1.59317	0	0.131434	1	2107	tags=25%, list=11%, signal=28%
GOBP_REGULATION_OF_LAMELLIPODIUM_ORGANIZATION	47	0.449535	1.58983	0.00688073	0.134499	1	6046	tags=55%, list=31%, signal=80%
GOBP_ARP2_3_COMPLEX_MEDIATED_ACTIN_NUCLEATION	32	0.487655	1.58948	0.02	0.134461	1	2580	tags=31%, list=13%, signal=36%
GOBP_NEGATIVE_REGULATION_OF_CELLULAR_RESPONSE_TO_INSULIN_STIMULUS	33	0.48912	1.58852	0.0200893	0.134977	1	2924	tags=52%, list=15%, signal=61%
GOBP_REGULATION_OF_CARBOHYDRATE_METABOLIC_PROCESS	165	0.358841	1.58839	0	0.134463	1	3666	tags=32%, list=19%, signal=39%
GOBP_REGULATION_OF_FATTY_ACID_OXIDATION	30	0.496422	1.58817	0.0157303	0.134082	1	3543	tags=43%, list=18%, signal=53%
GOBP_NEURON_RECOGNITION	49	0.445542	1.58715	0.00688073	0.134629	1	5143	tags=37%, list=27%, signal=50%
GOBP_POLARIZED_EPITHELIAL_CELL_DIFFERENTIATION	24	0.522949	1.58622	0.00904977	0.134947	1	1089	tags=25%, list=6%, signal=26%
GOBP_COENZYME_A_METABOLIC_PROCESS	17	0.571139	1.58479	0.0386965	0.136022	1	3813	tags=59%, list=20%, signal=73%
GOBP_REGULATION_OF_SODIUM_ION_TRANSMEMBRANE_TRANSPORT	57	0.43534	1.58345	0.00503778	0.137036	1	1524	tags=23%, list=8%, signal=25%
GOBP_COCHLEA_DEVELOPMENT	47	0.448926	1.58142	0.0114943	0.138692	1	1493	tags=17%, list=8%, signal=18%
GOBP_ENDODERMAL_CELL_FATE_COMMITMENT	15	0.588954	1.58008	0.0285714	0.13977	1	1397	tags=27%, list=7%, signal=29%
GOBP_PROTEIN_STABILIZATION	164	0.359435	1.57972	0	0.139605	1	2636	tags=26%, list=14%, signal=29%
GOBP_HYPOTHALAMUS_DEVELOPMENT	23	0.536963	1.57971	0.0241758	0.139006	1	2129	tags=22%, list=11%, signal=24%
GOBP_POSITIVE_REGULATION_OF_TRANSMEMBRANE_TRANSPORT	191	0.351932	1.57874	0	0.139568	1	2335	tags=20%, list=12%, signal=22%
GOBP_BONE_DEVELOPMENT	201	0.348812	1.57823	0	0.139517	1	2947	tags=23%, list=15%, signal=27%
GOBP_RESPONSE_TO_PH	45	0.444244	1.57637	0.0136986	0.141068	1	1455	tags=18%, list=7%, signal=19%
GOBP_HEPARAN_SULFATE_PROTEOGLYCAN_BIOSYNTHETIC_PROCESS	26	0.512734	1.57574	0.027897	0.141153	1	4904	tags=38%, list=25%, signal=51%
GOBP_LENS_DEVELOPMENT_IN_CAMERA_TYPE_EYE	80	0.407521	1.57408	0	0.142512	1	2348	tags=23%, list=12%, signal=25%
GOBP_PROTEIN_CATABOLIC_PROCESS_IN_THE_VACUOLE	19	0.554726	1.57406	0.0283401	0.141911	1	1327	tags=26%, list=7%, signal=28%
GOBP_SYMPATHETIC_NERVOUS_SYSTEM_DEVELOPMENT	22	0.530092	1.57391	0.0274262	0.141517	1	2753	tags=27%, list=14%, signal=32%
GOBP_ORGANELLE_TRANSPORT_ALONG_MICROTUBULE	77	0.409514	1.57375	0.00240385	0.141075	1	2381	tags=25%, list=12%, signal=28%
GOBP_CARDIAC_CHAMBER_DEVELOPMENT	158	0.3602	1.57025	0	0.144288	1	3095	tags=25%, list=16%, signal=30%
GOBP_REGULATION_OF_TISSUE_REMODELING	69	0.412908	1.56948	0.007109	0.144541	1	2153	tags=28%, list=11%, signal=31%
GOBP_INOSITOL_LIPID_MEDIATED_SIGNALING	164	0.353072	1.5691	0	0.144399	1	2959	tags=25%, list=15%, signal=29%
GOBP_DORSAL_SPINAL_CORD_DEVELOPMENT	20	0.547863	1.56836	0.0309917	0.14458	1	30	tags=10%, list=0%, signal=10%
GOBP_CELL_MATRIX_ADHESION	213	0.348577	1.56791	0	0.144438	1	2622	tags=23%, list=14%, signal=26%
GOBP_COLLATERAL_SPROUTING	22	0.525515	1.56776	0.0305499	0.14402	1	1751	tags=27%, list=9%, signal=30%
GOBP_NEGATIVE_REGULATION_OF_PHOSPHATASE_ACTIVITY	33	0.476642	1.56726	0.0172043	0.144044	1	1859	tags=30%, list=10%, signal=33%
GOBP_RESPONSE_TO_PROSTAGLANDIN_E	22	0.525125	1.56457	0.021097	0.146634	1	2573	tags=36%, list=13%, signal=42%
GOBP_NEGATIVE_REGULATION_OF_SMALL_GTPASE_MEDIATED_SIGNAL_TRANSDUCTION	46	0.449861	1.56401	0.00224719	0.146691	1	2498	tags=33%, list=13%, signal=37%
GOBP_EMBRYONIC_FORELIMB_MORPHOGENESIS	30	0.495386	1.56399	0.0234043	0.146152	1	3345	tags=40%, list=17%, signal=48%
GOBP_REGULATION_OF_CELL_SUBSTRATE_ADHESION	194	0.347262	1.56282	0	0.146829	1	3636	tags=34%, list=19%, signal=41%
GOBP_MULTICELLULAR_ORGANISM_GROWTH	132	0.366469	1.56181	0.00244499	0.147195	1	3003	tags=28%, list=15%, signal=33%
GOBP_NUCLEAR_TRANSCRIBED_MRNA_CATABOLIC_PROCESS_EXONUCLEOLYTIC	18	0.558211	1.56088	0.0421053	0.147767	1	4109	tags=50%, list=21%, signal=63%
GOBP_ENDODERM_DEVELOPMENT	73	0.405864	1.56038	0.0119048	0.147691	1	4292	tags=38%, list=22%, signal=49%
GOBP_TISSUE_REMODELING	157	0.360313	1.56007	0	0.147528	1	2153	tags=24%, list=11%, signal=27%
GOBP_EPHRIN_RECEPTOR_SIGNALING_PATHWAY	50	0.441059	1.55984	0.0160183	0.14724	1	3093	tags=32%, list=16%, signal=38%
GOBP_GANGLIOSIDE_METABOLIC_PROCESS	25	0.510738	1.55861	0.0254237	0.148247	1	4458	tags=52%, list=23%, signal=67%
GOBP_AORTA_MORPHOGENESIS	30	0.48475	1.55842	0.0301811	0.147867	1	1432	tags=27%, list=7%, signal=29%
GOBP_RHYTHMIC_BEHAVIOR	44	0.451483	1.5573	0.0111857	0.148616	1	2204	tags=30%, list=11%, signal=33%
GOBP_REGULATION_OF_NEURON_MIGRATION	40	0.461867	1.55692	0.0197368	0.14852	1	2750	tags=35%, list=14%, signal=41%
GOBP_REGULATION_OF_MRNA_CATABOLIC_PROCESS	147	0.359638	1.55567	0.00260417	0.149281	1	2111	tags=24%, list=11%, signal=27%
GOBP_POSITIVE_REGULATION_OF_LEUKOCYTE_DEGRANULATION	25	0.510432	1.55509	0.0280778	0.149421	1	1587	tags=28%, list=8%, signal=30%
GOBP_CHONDROCYTE_DEVELOPMENT	28	0.507322	1.55499	0.0241228	0.148973	1	4106	tags=46%, list=21%, signal=59%
GOBP_REGULATION_OF_DNA_METHYLATION_DEPENDENT_HETEROCHROMATIN_ASSEMBLY	16	0.564263	1.55494	0.0368764	0.148435	1	3116	tags=44%, list=16%, signal=52%
GOBP_POSITIVE_REGULATION_OF_CELL_PROJECTION_ORGANIZATION	312	0.332885	1.55427	0	0.148649	1	3093	tags=25%, list=16%, signal=30%
GOBP_REGULATION_OF_INTRACELLULAR_STEROID_HORMONE_RECEPTOR_SIGNALING_PATHWAY	63	0.412199	1.55342	0.00471698	0.149123	1	2764	tags=24%, list=14%, signal=28%
GOBP_REGULATION_OF_NEUROTRANSMITTER_TRANSPORT	94	0.384515	1.55292	0.00681818	0.149135	1	3355	tags=21%, list=17%, signal=26%
GOBP_ENDODERM_FORMATION	52	0.428918	1.55287	0.0117647	0.148636	1	4281	tags=38%, list=22%, signal=49%
GOBP_FATTY_ACYL_COA_METABOLIC_PROCESS	33	0.483042	1.55169	0.0262009	0.149419	1	3189	tags=36%, list=16%, signal=43%
GOBP_PROTEIN_ACYLATION	235	0.340565	1.55165	0	0.148919	1	3024	tags=27%, list=16%, signal=31%
GOBP_POSITIVE_REGULATION_OF_REGULATED_SECRETORY_PATHWAY	50	0.429173	1.55105	0.0133038	0.149074	1	1587	tags=22%, list=8%, signal=24%
GOBP_POSITIVE_REGULATION_OF_TRANSPORTER_ACTIVITY	106	0.378513	1.55083	0.00243902	0.148783	1	3419	tags=27%, list=18%, signal=33%
GOBP_ORGANISM_EMERGENCE_FROM_PROTECTIVE_STRUCTURE	25	0.509408	1.55031	0.0354767	0.148819	1	4794	tags=48%, list=25%, signal=64%
GOBP_REGULATION_OF_CELL_MATRIX_ADHESION	109	0.378494	1.54967	0.00253165	0.149053	1	2448	tags=31%, list=13%, signal=35%
GOBP_RESPONSE_TO_NERVE_GROWTH_FACTOR	47	0.436885	1.54958	0.0195228	0.14864	1	2998	tags=38%, list=15%, signal=45%
GOBP_POSITIVE_REGULATION_OF_EPIDERMAL_CELL_DIFFERENTIATION	21	0.527859	1.54925	0.0246085	0.148454	1	5187	tags=62%, list=27%, signal=84%
GOBP_REGULATION_OF_CARBOHYDRATE_BIOSYNTHETIC_PROCESS	91	0.384829	1.54784	0	0.149548	1	3666	tags=31%, list=19%, signal=38%
GOBP_ACTIN_CYTOSKELETON_REORGANIZATION	105	0.38414	1.54693	0.0023753	0.15007	1	2529	tags=23%, list=13%, signal=26%
GOBP_N_GLYCAN_PROCESSING	17	0.552274	1.54678	0.0355649	0.149708	1	4447	tags=53%, list=23%, signal=69%
GOBP_CORTICAL_ACTIN_CYTOSKELETON_ORGANIZATION	38	0.458715	1.54531	0.0205479	0.150876	1	2998	tags=37%, list=15%, signal=43%
GOBP_POSITIVE_REGULATION_OF_CELL_ADHESION_MEDIATED_BY_INTEGRIN	20	0.533408	1.5451	0.0357143	0.150572	1	6272	tags=70%, list=32%, signal=103%
GOBP_REGULATION_OF_COLLAGEN_METABOLIC_PROCESS	35	0.460721	1.54454	0.0239651	0.150627	1	44	tags=9%, list=0%, signal=9%
GOBP_POSITIVE_REGULATION_OF_FILOPODIUM_ASSEMBLY	26	0.500303	1.54327	0.0230608	0.151551	1	4834	tags=62%, list=25%, signal=82%
GOBP_ENAMEL_MINERALIZATION	17	0.558223	1.54311	0.0323887	0.151195	1	3014	tags=29%, list=16%, signal=35%
GOBP_NEGATIVE_REGULATION_OF_ERBB_SIGNALING_PATHWAY	24	0.507125	1.5429	0.0383065	0.150881	1	4746	tags=58%, list=24%, signal=77%
GOBP_HISTONE_H3_DEACETYLATION	16	0.573463	1.54179	0.046748	0.151796	1	3477	tags=44%, list=18%, signal=53%
GOBP_FC_RECEPTOR_SIGNALING_PATHWAY	48	0.436733	1.54067	0.00883002	0.152711	1	2445	tags=29%, list=13%, signal=33%
GOBP_AUTONOMIC_NERVOUS_SYSTEM_DEVELOPMENT	48	0.428652	1.5396	0.015873	0.153436	1	2777	tags=23%, list=14%, signal=27%
GOBP_ACTIN_NUCLEATION	43	0.446595	1.53946	0.0200893	0.153057	1	2580	tags=33%, list=13%, signal=37%
GOBP_REGULATION_OF_PLATELET_DERIVED_GROWTH_FACTOR_RECEPTOR_SIGNALING_PATHWAY	21	0.520698	1.53881	0.0289256	0.15333	1	2538	tags=43%, list=13%, signal=49%
GOBP_NEGATIVE_REGULATION_OF_OXIDATIVE_STRESS_INDUCED_NEURON_DEATH	16	0.565354	1.53829	0.03125	0.153449	1	3600	tags=44%, list=19%, signal=54%
GOBP_AMINOGLYCAN_CATABOLIC_PROCESS	30	0.487492	1.53643	0.0210526	0.155009	1	1952	tags=23%, list=10%, signal=26%
GOBP_NEGATIVE_REGULATION_OF_CELL_PROJECTION_ORGANIZATION	167	0.348537	1.53384	0.00260417	0.157533	1	3602	tags=29%, list=19%, signal=35%
GOBP_REGULATION_OF_EPITHELIAL_TO_MESENCHYMAL_TRANSITION	86	0.386932	1.53353	0.00702576	0.157426	1	4100	tags=36%, list=21%, signal=45%
GOBP_SKELETAL_SYSTEM_DEVELOPMENT	482	0.309534	1.53332	0	0.157123	1	4026	tags=27%, list=21%, signal=33%
GOBP_REGULATION_OF_RNA_SPLICING	138	0.358404	1.53258	0.00255754	0.157343	1	2686	tags=25%, list=14%, signal=28%
GOBP_REGULATION_OF_WNT_SIGNALING_PATHWAY	306	0.325892	1.53102	0	0.158698	1	2981	tags=25%, list=15%, signal=29%
GOBP_CELL_SURFACE_RECEPTOR_SIGNALING_PATHWAY_INVOLVED_IN_CELL_CELL_SIGNALING	500	0.310608	1.53088	0	0.158314	1	3027	tags=23%, list=16%, signal=27%
GOBP_AMEBOIDAL_TYPE_CELL_MIGRATION	382	0.315708	1.53004	0	0.158874	1	2111	tags=21%, list=11%, signal=23%
GOBP_HISTONE_METHYLATION	141	0.358756	1.52929	0.00492611	0.159323	1	4682	tags=38%, list=24%, signal=50%
GOBP_REGULATION_OF_RECEPTOR_LOCALIZATION_TO_SYNAPSE	17	0.552033	1.52882	0.0488798	0.159399	1	2504	tags=41%, list=13%, signal=47%
GOBP_REGULATION_OF_PHOSPHATIDYLINOSITOL_3_KINASE_SIGNALING	98	0.374466	1.52804	0.00246914	0.159854	1	2778	tags=26%, list=14%, signal=30%
GOBP_MIDBRAIN_DOPAMINERGIC_NEURON_DIFFERENTIATION	17	0.53969	1.52691	0.045929	0.160549	1	2940	tags=29%, list=15%, signal=35%
GOBP_REGULATION_OF_CANONICAL_WNT_SIGNALING_PATHWAY	237	0.338716	1.52658	0	0.160397	1	2981	tags=25%, list=15%, signal=30%
GOBP_G_PROTEIN_COUPLED_ACETYLCHOLINE_RECEPTOR_SIGNALING_PATHWAY	18	0.54283	1.5262	0.0428571	0.16037	1	6442	tags=72%, list=33%, signal=108%
GOBP_ESTABLISHMENT_OF_EPITHELIAL_CELL_APICAL_BASAL_POLARITY	17	0.562842	1.52602	0.0255864	0.160091	1	1089	tags=24%, list=6%, signal=25%
GOBP_SENSORY_ORGAN_MORPHOGENESIS	254	0.333301	1.52496	0	0.160811	1	3084	tags=22%, list=16%, signal=25%
GOBP_VESICLE_MEDIATED_TRANSPORT_IN_SYNAPSE	191	0.343412	1.52495	0.00257732	0.160291	1	3129	tags=24%, list=16%, signal=28%
GOBP_CAMERA_TYPE_EYE_DEVELOPMENT	317	0.322848	1.52414	0	0.16081	1	3770	tags=27%, list=19%, signal=33%
GOBP_EMBRYONIC_DIGIT_MORPHOGENESIS	54	0.413674	1.5241	0.00712589	0.160338	1	4305	tags=41%, list=22%, signal=52%
GOBP_HISTONE_H4_K5_ACETYLATION	15	0.558244	1.52382	0.0552147	0.16014	1	4280	tags=40%, list=22%, signal=51%
GOBP_POSITIVE_REGULATION_OF_NERVOUS_SYSTEM_DEVELOPMENT	258	0.327946	1.52275	0	0.160987	1	3093	tags=24%, list=16%, signal=29%
GOBP_CELLULAR_RESPONSE_TO_ESTRADIOL_STIMULUS	38	0.455201	1.52208	0.0385439	0.161286	1	6015	tags=58%, list=31%, signal=84%
GOBP_CHROMATIN_ASSEMBLY_OR_DISASSEMBLY	149	0.350783	1.52115	0.00263158	0.161918	1	3116	tags=31%, list=16%, signal=36%
GOBP_POSITIVE_REGULATION_OF_CELLULAR_CARBOHYDRATE_METABOLIC_PROCESS	51	0.428941	1.52112	0.0229167	0.161427	1	2764	tags=27%, list=14%, signal=32%
GOBP_REGULATION_OF_ARP2_3_COMPLEX_MEDIATED_ACTIN_NUCLEATION	19	0.529469	1.52024	0.0403226	0.16193	1	2580	tags=37%, list=13%, signal=42%
GOBP_POSITIVE_REGULATION_OF_OXIDATIVE_STRESS_INDUCED_CELL_DEATH	18	0.532123	1.52004	0.0606695	0.161676	1	1794	tags=39%, list=9%, signal=43%
GOBP_POSITIVE_REGULATION_OF_GLUCOSE_METABOLIC_PROCESS	37	0.462733	1.52004	0.0348837	0.161167	1	2065	tags=27%, list=11%, signal=30%
GOBP_REGULATION_OF_PROTEIN_ACETYLATION	76	0.386646	1.51934	0.00952381	0.161519	1	2804	tags=30%, list=14%, signal=35%
GOBP_CELL_DEATH_IN_RESPONSE_TO_HYDROGEN_PEROXIDE	24	0.495758	1.51931	0.0363248	0.161056	1	1461	tags=33%, list=8%, signal=36%
GOBP_POSITIVE_REGULATION_OF_ACTIN_NUCLEATION	16	0.544333	1.51804	0.0607287	0.162075	1	2580	tags=38%, list=13%, signal=43%
GOBP_HISTONE_DEACETYLATION	93	0.37544	1.51701	0.00707547	0.162888	1	2954	tags=30%, list=15%, signal=35%
GOBP_MEMBRANE_PROTEIN_PROTEOLYSIS	52	0.414949	1.51593	0.0233645	0.163843	1	3264	tags=40%, list=17%, signal=48%
GOBP_HISTONE_DEUBIQUITINATION	37	0.451659	1.5142	0.0271493	0.165403	1	3952	tags=35%, list=20%, signal=44%
GOBP_EMBRYONIC_ORGAN_DEVELOPMENT	432	0.30866	1.51336	0	0.165884	1	3036	tags=23%, list=16%, signal=27%
GOBP_SULFUR_COMPOUND_CATABOLIC_PROCESS	30	0.474098	1.51208	0.0271967	0.166942	1	3189	tags=40%, list=16%, signal=48%
GOBP_REGULATION_OF_TRANSMEMBRANE_RECEPTOR_PROTEIN_SERINE_THREONINE_KINASE_SIGNALING_PATHWAY	239	0.332594	1.51194	0	0.166582	1	2552	tags=23%, list=13%, signal=27%
GOBP_REGULATION_OF_MUSCLE_CELL_DIFFERENTIATION	119	0.359996	1.51061	0.00771208	0.167688	1	2836	tags=26%, list=15%, signal=30%
GOBP_PROTEIN_LOCALIZATION_TO_CELL_JUNCTION	91	0.376838	1.50899	0.0146699	0.169196	1	3203	tags=30%, list=17%, signal=35%
GOBP_PROTEIN_METHYLATION	171	0.341565	1.50828	0	0.169523	1	4682	tags=35%, list=24%, signal=46%
GOBP_ACTIN_FILAMENT_ORGANIZATION	401	0.308286	1.50715	0	0.170379	1	2586	tags=22%, list=13%, signal=25%
GOBP_EMBRYONIC_SKELETAL_SYSTEM_DEVELOPMENT	119	0.357815	1.50702	0.0101523	0.170043	1	4026	tags=33%, list=21%, signal=41%
GOBP_NEGATIVE_REGULATION_OF_NEURAL_PRECURSOR_CELL_PROLIFERATION	20	0.510515	1.50648	0.0487288	0.170193	1	1598	tags=20%, list=8%, signal=22%
GOBP_POSITIVE_REGULATION_OF_LIPID_KINASE_ACTIVITY	37	0.448286	1.50622	0.027027	0.170072	1	4472	tags=38%, list=23%, signal=49%
GOBP_REGULATION_OF_PROTEIN_TARGETING_TO_MEMBRANE	34	0.46519	1.50612	0.0342612	0.169692	1	986	tags=21%, list=5%, signal=22%
GOBP_POSITIVE_REGULATION_OF_ATP_METABOLIC_PROCESS	30	0.478	1.50555	0.0300429	0.169903	1	2372	tags=30%, list=12%, signal=34%
GOBP_NEGATIVE_REGULATION_OF_AXONOGENESIS	58	0.411967	1.50499	0.0282609	0.170008	1	1751	tags=21%, list=9%, signal=23%
GOBP_MAMMARY_GLAND_EPITHELIAL_CELL_PROLIFERATION	25	0.503521	1.50411	0.0454545	0.170708	1	1141	tags=28%, list=6%, signal=30%
GOBP_REGULATION_OF_CELLULAR_COMPONENT_SIZE	316	0.31434	1.50217	0	0.172825	1	3035	tags=23%, list=16%, signal=27%
GOBP_GLAND_MORPHOGENESIS	117	0.356734	1.5021	0.00263852	0.172422	1	2346	tags=21%, list=12%, signal=24%
GOBP_PEPTIDYL_LYSINE_TRIMETHYLATION	46	0.437273	1.50182	0.021327	0.172249	1	4608	tags=48%, list=24%, signal=63%
GOBP_CYTOSOLIC_TRANSPORT	149	0.34968	1.50165	0.0057971	0.171937	1	2496	tags=23%, list=13%, signal=27%
GOBP_EPITHELIAL_CELL_DEVELOPMENT	202	0.337233	1.49934	0.00277778	0.174389	1	2590	tags=24%, list=13%, signal=27%
GOBP_FORELIMB_MORPHOGENESIS	37	0.442423	1.4992	0.0304348	0.174065	1	3345	tags=35%, list=17%, signal=42%
GOBP_SYNAPTIC_VESICLE_MEMBRANE_ORGANIZATION	26	0.488444	1.49899	0.0473251	0.173849	1	2689	tags=31%, list=14%, signal=36%
GOBP_MEMBRANE_PROTEIN_ECTODOMAIN_PROTEOLYSIS	42	0.445463	1.49871	0.0224719	0.173704	1	3264	tags=45%, list=17%, signal=54%
GOBP_PHOSPHATIDYLINOSITOL_3_KINASE_SIGNALING	128	0.354754	1.498	0.00487805	0.174192	1	2855	tags=26%, list=15%, signal=30%
GOBP_RESPONSE_TO_LECTIN	18	0.539064	1.4971	0.0487288	0.174812	1	3624	tags=44%, list=19%, signal=55%
GOBP_DEVELOPMENTAL_CELL_GROWTH	200	0.339319	1.49662	0	0.17486	1	1751	tags=18%, list=9%, signal=19%
GOBP_REGULATION_OF_INSULIN_SECRETION_INVOLVED_IN_CELLULAR_RESPONSE_TO_GLUCOSE_STIMULUS	48	0.416868	1.49558	0.0186047	0.175799	1	2502	tags=27%, list=13%, signal=31%
GOBP_REGULATION_OF_CHROMATIN_ASSEMBLY	27	0.473091	1.49451	0.0511111	0.176639	1	3116	tags=37%, list=16%, signal=44%
GOBP_TISSUE_MIGRATION	277	0.321029	1.49448	0	0.176178	1	1724	tags=20%, list=9%, signal=22%
GOBP_REGULATION_OF_CARBOHYDRATE_CATABOLIC_PROCESS	48	0.429415	1.49447	0.0164319	0.175685	1	3543	tags=40%, list=18%, signal=48%
GOBP_AXO_DENDRITIC_TRANSPORT	73	0.390228	1.49401	0.0121065	0.175815	1	2381	tags=26%, list=12%, signal=30%
GOBP_MAMMARY_GLAND_EPITHELIAL_CELL_DIFFERENTIATION	18	0.518652	1.49389	0.0587002	0.175465	1	3256	tags=44%, list=17%, signal=53%
GOBP_REGULATION_OF_REGULATED_SECRETORY_PATHWAY	137	0.352889	1.49384	0.00515464	0.175017	1	3739	tags=28%, list=19%, signal=34%
GOBP_REGULATION_OF_PEPTIDYL_LYSINE_ACETYLATION	69	0.393275	1.49333	0.0167866	0.175185	1	2804	tags=32%, list=14%, signal=37%
GOBP_HEPARAN_SULFATE_PROTEOGLYCAN_METABOLIC_PROCESS	32	0.455457	1.49322	0.027027	0.174843	1	4904	tags=34%, list=25%, signal=46%
GOBP_REGULATION_OF_GLYCOLYTIC_PROCESS	39	0.44334	1.49303	0.0305011	0.174576	1	3049	tags=36%, list=16%, signal=43%
GOBP_CYTOPLASMIC_TRANSLATIONAL_INITIATION	21	0.512965	1.49283	0.0584551	0.174339	1	5480	tags=62%, list=28%, signal=86%
GOBP_POSITIVE_REGULATION_OF_SYNAPSE_ASSEMBLY	61	0.403942	1.49164	0.0247748	0.175443	1	781	tags=18%, list=4%, signal=19%
GOBP_TRANSCRIPTION_PREINITIATION_COMPLEX_ASSEMBLY	39	0.431579	1.49137	0.0380313	0.1753	1	5080	tags=49%, list=26%, signal=66%
GOBP_POTASSIUM_ION_HOMEOSTASIS	31	0.460621	1.49087	0.0389908	0.175351	1	3799	tags=35%, list=20%, signal=44%
GOBP_CYTOSKELETON_DEPENDENT_INTRACELLULAR_TRANSPORT	176	0.337576	1.49063	0	0.175161	1	2586	tags=27%, list=13%, signal=31%
GOBP_CARDIAC_VENTRICLE_DEVELOPMENT	119	0.355	1.488	0.0108108	0.178088	1	3055	tags=24%, list=16%, signal=29%
GOBP_ANION_HOMEOSTASIS	37	0.446308	1.48773	0.0314465	0.177934	1	2605	tags=32%, list=13%, signal=37%
GOBP_MUCOPOLYSACCHARIDE_METABOLIC_PROCESS	83	0.374916	1.48647	0.0114155	0.17905	1	1559	tags=16%, list=8%, signal=17%
GOBP_FORMATION_OF_PRIMARY_GERM_LAYER	115	0.351622	1.48635	0.00977995	0.178659	1	4292	tags=37%, list=22%, signal=47%
GOBP_MONOUBIQUITINATED_PROTEIN_DEUBIQUITINATION	32	0.467316	1.48606	0.0318471	0.178566	1	3805	tags=41%, list=20%, signal=50%
GOBP_NEGATIVE_REGULATION_OF_INTRINSIC_APOPTOTIC_SIGNALING_PATHWAY_BY_P53_CLASS_MEDIATOR	18	0.535459	1.4856	0.0449438	0.178667	1	4807	tags=61%, list=25%, signal=81%
GOBP_HISTONE_UBIQUITINATION	45	0.425838	1.48541	0.032538	0.178414	1	1749	tags=29%, list=9%, signal=32%
GOBP_REGULATION_OF_BMP_SIGNALING_PATHWAY	94	0.369561	1.4838	0.0215311	0.180112	1	2346	tags=21%, list=12%, signal=24%
GOBP_PROTEIN_TARGETING_TO_VACUOLE	33	0.451276	1.48302	0.0309735	0.180624	1	5736	tags=48%, list=30%, signal=69%
GOBP_PEPTIDYL_LYSINE_MODIFICATION	348	0.31074	1.48245	0	0.18097	1	3116	tags=27%, list=16%, signal=31%
GOBP_BRANCHING_MORPHOGENESIS_OF_AN_EPITHELIAL_TUBE	146	0.347421	1.48194	0.00787402	0.181126	1	2969	tags=25%, list=15%, signal=29%
GOBP_MRNA_CATABOLIC_PROCESS	199	0.328491	1.48135	0	0.181449	1	4302	tags=33%, list=22%, signal=42%
GOBP_NEGATIVE_REGULATION_OF_GENE_EXPRESSION_EPIGENETIC	68	0.392324	1.48041	0.0179775	0.182239	1	3342	tags=34%, list=17%, signal=41%
GOBP_POSITIVE_REGULATION_OF_LAMELLIPODIUM_ORGANIZATION	33	0.460825	1.4783	0.0333333	0.184431	1	1621	tags=24%, list=8%, signal=26%
GOBP_C4_DICARBOXYLATE_TRANSPORT	27	0.47564	1.47684	0.0474138	0.185829	1	2684	tags=30%, list=14%, signal=34%
GOBP_VESICLE_TRANSPORT_ALONG_MICROTUBULE	39	0.444181	1.47393	0.0374449	0.188951	1	2244	tags=26%, list=12%, signal=29%
GOBP_REGULATION_OF_VESICLE_MEDIATED_TRANSPORT	489	0.298752	1.47302	0	0.189745	1	3093	tags=22%, list=16%, signal=26%
GOBP_FIBROBLAST_GROWTH_FACTOR_RECEPTOR_SIGNALING_PATHWAY	76	0.377379	1.47273	0.00728155	0.189629	1	4436	tags=30%, list=23%, signal=39%
GOBP_HETEROCHROMATIN_ORGANIZATION	69	0.383662	1.47269	0.0171569	0.189207	1	3342	tags=35%, list=17%, signal=42%
GOBP_REGULATION_OF_MRNA_SPLICING_VIA_SPLICEOSOME	93	0.366744	1.47243	0.017199	0.189093	1	5332	tags=40%, list=27%, signal=55%
GOBP_REGULATION_OF_MIRNA_TRANSCRIPTION	55	0.398617	1.47238	0.0188235	0.188666	1	1692	tags=24%, list=9%, signal=26%
GOBP_POSITIVE_REGULATION_OF_ALCOHOL_BIOSYNTHETIC_PROCESS	24	0.481081	1.47221	0.0399113	0.188403	1	2746	tags=29%, list=14%, signal=34%
GOBP_INSULIN_SECRETION_INVOLVED_IN_CELLULAR_RESPONSE_TO_GLUCOSE_STIMULUS	54	0.408531	1.47203	0.0365297	0.188117	1	2502	tags=26%, list=13%, signal=30%
GOBP_REGULATION_OF_NERVOUS_SYSTEM_DEVELOPMENT	411	0.30393	1.47202	0	0.187651	1	2537	tags=20%, list=13%, signal=23%
GOBP_LYSOSOMAL_PROTEIN_CATABOLIC_PROCESS	15	0.550556	1.47133	0.0516529	0.18808	1	2496	tags=33%, list=13%, signal=38%
GOBP_CELL_MIGRATION_IN_HINDBRAIN	16	0.550385	1.47133	0.0408163	0.187594	1	1522	tags=25%, list=8%, signal=27%
GOBP_DEVELOPMENTAL_INDUCTION	34	0.449712	1.47114	0.0287611	0.187395	1	82	tags=9%, list=0%, signal=9%
GOBP_NEURON_PROJECTION_EXTENSION_INVOLVED_IN_NEURON_PROJECTION_GUIDANCE	35	0.449265	1.47094	0.044843	0.187125	1	1739	tags=26%, list=9%, signal=28%
GOBP_PEPTIDYL_LYSINE_METHYLATION	119	0.349755	1.47	0.0026738	0.187873	1	4682	tags=40%, list=24%, signal=53%
GOBP_REGULATION_OF_CHOLESTEROL_BIOSYNTHETIC_PROCESS	17	0.517642	1.46977	0.0560345	0.18769	1	2372	tags=24%, list=12%, signal=27%
GOBP_RESPONSE_TO_ACIDIC_PH	29	0.45915	1.46919	0.0466102	0.188012	1	1455	tags=21%, list=7%, signal=22%
GOBP_REGULATION_OF_POSTSYNAPTIC_MEMBRANE_NEUROTRANSMITTER_RECEPTOR_LEVELS	51	0.411698	1.46858	0.0406852	0.18833	1	2504	tags=22%, list=13%, signal=25%
GOBP_CELLULAR_RESPONSE_TO_PH	27	0.465345	1.46824	0.0342612	0.188319	1	5962	tags=56%, list=31%, signal=80%
GOBP_SPROUTING_ANGIOGENESIS	120	0.352118	1.46817	0.00719425	0.187941	1	2002	tags=20%, list=10%, signal=22%
GOBP_METHYLATION	326	0.308667	1.46735	0	0.188468	1	4813	tags=33%, list=25%, signal=43%
GOBP_SENSORY_PERCEPTION_OF_MECHANICAL_STIMULUS	166	0.334954	1.46669	0.00514139	0.188839	1	2871	tags=25%, list=15%, signal=29%
GOBP_REGULATION_OF_ATP_METABOLIC_PROCESS	73	0.381708	1.46548	0.0255754	0.189996	1	3543	tags=34%, list=18%, signal=42%
GOBP_POSITIVE_REGULATION_OF_MICROTUBULE_POLYMERIZATION_OR_DEPOLYMERIZATION	33	0.45004	1.46337	0.0365591	0.192257	1	2613	tags=27%, list=13%, signal=31%
GOBP_REGULATION_OF_PROTEIN_STABILITY	260	0.317261	1.46336	0.00287356	0.191792	1	2672	tags=23%, list=14%, signal=26%
GOBP_PRESYNAPTIC_ENDOCYTOSIS	59	0.393606	1.46321	0.0114416	0.19154	1	3060	tags=32%, list=16%, signal=38%
GOBP_ASSOCIATIVE_LEARNING	75	0.385283	1.46251	0.0204545	0.192017	1	1740	tags=19%, list=9%, signal=20%
GOBP_SPHINGOSINE_BIOSYNTHETIC_PROCESS	15	0.54563	1.46056	0.0862423	0.194128	1	2582	tags=33%, list=13%, signal=38%
GOBP_CALCIUM_ION_REGULATED_EXOCYTOSIS	64	0.389405	1.46053	0.0405728	0.193705	1	4256	tags=34%, list=22%, signal=44%
GOBP_REGULATION_OF_CELLULAR_RESPONSE_TO_GROWTH_FACTOR_STIMULUS	272	0.313978	1.46015	0	0.193774	1	2223	tags=20%, list=11%, signal=23%
GOBP_ECTODERM_DEVELOPMENT	20	0.505799	1.46001	0.0555556	0.193491	1	4867	tags=50%, list=25%, signal=67%
GOBP_REGULATION_OF_POSTSYNAPTIC_NEUROTRANSMITTER_RECEPTOR_ACTIVITY	17	0.526417	1.45969	0.0708333	0.193411	1	1382	tags=29%, list=7%, signal=32%
GOBP_EPITHELIAL_TO_MESENCHYMAL_TRANSITION	144	0.336265	1.45896	0.00539084	0.193842	1	4100	tags=34%, list=21%, signal=43%
GOBP_POSITIVE_REGULATION_OF_POTASSIUM_ION_TRANSPORT	48	0.41213	1.4587	0.0295455	0.193724	1	2044	tags=21%, list=11%, signal=23%
GOBP_CELL_SUBSTRATE_JUNCTION_ORGANIZATION	88	0.365163	1.45851	0.0261905	0.193503	1	3710	tags=36%, list=19%, signal=45%
GOBP_POSITIVE_REGULATION_OF_RHO_PROTEIN_SIGNAL_TRANSDUCTION	30	0.457488	1.45844	0.0449438	0.193163	1	2687	tags=23%, list=14%, signal=27%
GOBP_REGULATION_OF_SYNAPSE_ASSEMBLY	99	0.360181	1.45765	0.0071599	0.193772	1	2374	tags=21%, list=12%, signal=24%
GOBP_MESENCHYMAL_CELL_APOPTOTIC_PROCESS	15	0.533438	1.45726	0.0740741	0.19388	1	2223	tags=33%, list=11%, signal=38%
GOBP_N_ACETYLGLUCOSAMINE_METABOLIC_PROCESS	16	0.542739	1.45626	0.0668104	0.194784	1	5881	tags=63%, list=30%, signal=90%
GOBP_REGULATION_OF_PROTON_TRANSPORT	19	0.511659	1.45563	0.0617021	0.195195	1	3377	tags=37%, list=17%, signal=45%
GOBP_REGULATION_OF_CLATHRIN_DEPENDENT_ENDOCYTOSIS	17	0.542545	1.45532	0.0660981	0.19516	1	2732	tags=35%, list=14%, signal=41%
GOBP_REGULATION_OF_ACTIN_CYTOSKELETON_REORGANIZATION	37	0.438568	1.45407	0.047191	0.19648	1	4865	tags=41%, list=25%, signal=54%
GOBP_REGULATION_OF_ESTABLISHMENT_OR_MAINTENANCE_OF_CELL_POLARITY	22	0.48523	1.45401	0.0636943	0.196089	1	1282	tags=32%, list=7%, signal=34%
GOBP_SYNAPSE_ASSEMBLY	173	0.33271	1.45256	0	0.197641	1	3391	tags=24%, list=17%, signal=28%
GOBP_NEGATIVE_REGULATION_OF_MUSCLE_CELL_DIFFERENTIATION	51	0.413025	1.45196	0.0356347	0.198023	1	4469	tags=47%, list=23%, signal=61%
GOBP_TOOTH_MINERALIZATION	24	0.474971	1.45171	0.0611354	0.197896	1	3014	tags=21%, list=16%, signal=25%
GOBP_COLLAGEN_METABOLIC_PROCESS	91	0.370107	1.45128	0.0170316	0.19799	1	2410	tags=23%, list=12%, signal=26%
GOBP_MEMBRANE_DOCKING	81	0.37314	1.45088	0.0167866	0.19803	1	2641	tags=25%, list=14%, signal=28%
GOBP_VIRAL_PROTEIN_PROCESSING	30	0.455037	1.45079	0.0568421	0.197662	1	1458	tags=30%, list=8%, signal=32%
GOBP_REGULATION_OF_OSTEOBLAST_DIFFERENTIATION	118	0.345793	1.44859	0.0124688	0.200202	1	3770	tags=29%, list=19%, signal=36%
GOBP_POSITIVE_REGULATION_OF_PROTEIN_LOCALIZATION_TO_CELL_PERIPHERY	63	0.384424	1.44822	0.0379147	0.200203	1	3079	tags=32%, list=16%, signal=38%
GOBP_LIPID_OXIDATION	107	0.351462	1.44793	0.0176322	0.200158	1	4659	tags=38%, list=24%, signal=50%
GOBP_NEGATIVE_REGULATION_OF_MRNA_CATABOLIC_PROCESS	54	0.388734	1.44772	0.0337838	0.199949	1	3247	tags=30%, list=17%, signal=35%
GOBP_REGULATION_OF_NEURAL_PRECURSOR_CELL_PROLIFERATION	80	0.365014	1.44655	0.0271605	0.201275	1	2382	tags=23%, list=12%, signal=26%
GOBP_POSITIVE_REGULATION_OF_GLUCOSE_IMPORT	33	0.443857	1.44628	0.0529661	0.201126	1	2131	tags=24%, list=11%, signal=27%
GOBP_EXOCYTIC_PROCESS	73	0.377473	1.44557	0.0165485	0.201655	1	2689	tags=25%, list=14%, signal=29%
GOBP_DICARBOXYLIC_ACID_TRANSPORT	89	0.366189	1.44509	0.02746	0.201894	1	3061	tags=26%, list=16%, signal=31%
GOBP_REGIONALIZATION	331	0.30325	1.44379	0	0.203196	1	4026	tags=28%, list=21%, signal=35%
GOBP_NEGATIVE_REGULATION_OF_FIBROBLAST_GROWTH_FACTOR_RECEPTOR_SIGNALING_PATHWAY	18	0.508382	1.44312	0.0599174	0.203574	1	2072	tags=22%, list=11%, signal=25%
GOBP_POSITIVE_REGULATION_OF_NEUROGENESIS	212	0.322299	1.44249	0	0.203947	1	3093	tags=24%, list=16%, signal=28%
GOBP_NEURON_PROJECTION_EXTENSION	158	0.330568	1.44033	0.0170316	0.206512	1	1522	tags=16%, list=8%, signal=18%
GOBP_REGULATION_OF_STEM_CELL_DIFFERENTIATION	57	0.390681	1.4387	0.0290557	0.208355	1	3256	tags=35%, list=17%, signal=42%
GOBP_BONE_REMODELING	85	0.363816	1.4386	0.027972	0.208034	1	2997	tags=28%, list=15%, signal=33%
GOBP_REGULATION_OF_SUPEROXIDE_METABOLIC_PROCESS	29	0.444602	1.43794	0.0372807	0.208512	1	6969	tags=59%, list=36%, signal=91%
GOBP_REGULATION_OF_CHOLESTEROL_METABOLIC_PROCESS	30	0.452859	1.43746	0.0617021	0.208663	1	3906	tags=30%, list=20%, signal=38%
GOBP_PATTERN_SPECIFICATION_PROCESS	429	0.294855	1.43743	0.0100671	0.208231	1	2789	tags=20%, list=14%, signal=23%
GOBP_MRNA_PROCESSING	408	0.293894	1.43678	0	0.208746	1	4261	tags=29%, list=22%, signal=37%
GOBP_REGULATION_OF_SUPEROXIDE_ANION_GENERATION	22	0.484266	1.43661	0.0595483	0.208452	1	5197	tags=45%, list=27%, signal=62%
GOBP_ACTIVATION_OF_GTPASE_ACTIVITY	92	0.359706	1.43638	0.0167464	0.208295	1	4263	tags=36%, list=22%, signal=46%
GOBP_GASTRULATION	170	0.327546	1.43603	0.0101266	0.208327	1	4026	tags=31%, list=21%, signal=39%
GOBP_NEGATIVE_REGULATION_OF_RESPONSE_TO_OXIDATIVE_STRESS	17	0.51792	1.4345	0.0603448	0.210035	1	834	tags=24%, list=4%, signal=25%
GOBP_POSITIVE_REGULATION_OF_EPIDERMIS_DEVELOPMENT	25	0.465292	1.43449	0.0608519	0.209574	1	5187	tags=56%, list=27%, signal=76%
GOBP_REGULATION_OF_NEURONAL_SYNAPTIC_PLASTICITY	46	0.401912	1.43336	0.0488889	0.210659	1	2821	tags=24%, list=15%, signal=28%
GOBP_REGULATION_OF_LEUKOCYTE_DEGRANULATION	49	0.409355	1.43231	0.0285714	0.211663	1	1587	tags=20%, list=8%, signal=22%
GOBP_VESICLE_DOCKING	56	0.394695	1.43217	0.0425056	0.21137	1	2500	tags=23%, list=13%, signal=27%
GOBP_PARASYMPATHETIC_NERVOUS_SYSTEM_DEVELOPMENT	19	0.505528	1.43212	0.0770791	0.210977	1	2753	tags=21%, list=14%, signal=25%
GOBP_CENTRAL_NERVOUS_SYSTEM_NEURON_DEVELOPMENT	75	0.375637	1.43116	0.0344828	0.21191	1	2561	tags=20%, list=13%, signal=23%
GOBP_AXON_EXTENSION	112	0.344819	1.42986	0.0187166	0.213255	1	1739	tags=19%, list=9%, signal=20%
GOBP_NEGATIVE_REGULATION_OF_STRIATED_MUSCLE_CELL_DIFFERENTIATION	31	0.443564	1.4288	0.0568928	0.214198	1	4942	tags=45%, list=25%, signal=60%
GOBP_LYSOSOMAL_TRANSPORT	105	0.346605	1.42739	0.0229358	0.215624	1	4159	tags=28%, list=21%, signal=35%
GOBP_NEGATIVE_REGULATION_OF_CANONICAL_WNT_SIGNALING_PATHWAY	129	0.339261	1.4269	0.00506329	0.215883	1	2981	tags=28%, list=15%, signal=33%
GOBP_CELLULAR_RESPONSE_TO_CARBOHYDRATE_STIMULUS	125	0.341362	1.42678	0.0174129	0.215584	1	2502	tags=23%, list=13%, signal=26%
GOBP_NEGATIVE_REGULATION_OF_EPITHELIAL_CELL_APOPTOTIC_PROCESS	48	0.402937	1.42616	0.0480349	0.216018	1	957	tags=19%, list=5%, signal=20%
GOBP_POSITIVE_REGULATION_OF_MRNA_METABOLIC_PROCESS	106	0.347154	1.42595	0.0268949	0.215839	1	4261	tags=34%, list=22%, signal=43%
GOBP_RECEPTOR_LOCALIZATION_TO_SYNAPSE	52	0.385999	1.42472	0.037123	0.217196	1	2504	tags=23%, list=13%, signal=26%
GOBP_ENDOSOMAL_TRANSPORT	202	0.315459	1.42385	0	0.217993	1	5067	tags=33%, list=26%, signal=44%
GOBP_POSITIVE_REGULATION_OF_JNK_CASCADE	92	0.35489	1.42347	0.0277136	0.218095	1	3027	tags=26%, list=16%, signal=31%
GOBP_CELL_VOLUME_HOMEOSTASIS	29	0.457156	1.42209	0.0549683	0.219632	1	1155	tags=14%, list=6%, signal=15%
GOBP_NEGATIVE_CHEMOTAXIS	45	0.406572	1.422	0.0441501	0.219263	1	2969	tags=27%, list=15%, signal=31%
GOBP_POSITIVE_REGULATION_OF_MYELINATION	17	0.517699	1.42144	0.0617284	0.219588	1	1864	tags=35%, list=10%, signal=39%
GOBP_POSITIVE_REGULATION_OF_ION_TRANSMEMBRANE_TRANSPORT	146	0.333877	1.4213	0.0103896	0.219311	1	2335	tags=19%, list=12%, signal=22%
GOBP_LUNG_CELL_DIFFERENTIATION	23	0.47523	1.42095	0.0523013	0.219332	1	680	tags=22%, list=4%, signal=23%
GOBP_VIRAL_GENE_EXPRESSION	89	0.357561	1.42086	0.0121065	0.218982	1	2196	tags=25%, list=11%, signal=28%
GOBP_REGULATION_OF_INSULIN_SECRETION	142	0.331122	1.42063	0.00537634	0.218842	1	2767	tags=25%, list=14%, signal=29%
GOBP_REGULATION_OF_ALCOHOL_BIOSYNTHETIC_PROCESS	46	0.400512	1.41913	0.0438799	0.22052	1	2746	tags=24%, list=14%, signal=28%
GOBP_NEURON_PROJECTION_ARBORIZATION	27	0.457227	1.41912	0.0765957	0.22007	1	1935	tags=22%, list=10%, signal=25%
GOBP_AMINO_ACID_TRANSMEMBRANE_TRANSPORT	92	0.350749	1.41881	0.0258824	0.220068	1	2838	tags=25%, list=15%, signal=29%
GOBP_TRANSCYTOSIS	21	0.486729	1.41881	0.0614407	0.219605	1	2169	tags=29%, list=11%, signal=32%
GOBP_UROGENITAL_SYSTEM_DEVELOPMENT	341	0.295424	1.41837	0.00330033	0.219779	1	2346	tags=19%, list=12%, signal=21%
GOBP_CHONDROITIN_SULFATE_PROTEOGLYCAN_METABOLIC_PROCESS	33	0.439201	1.41773	0.0497925	0.220238	1	891	tags=15%, list=5%, signal=16%
GOBP_REGULATION_OF_PROTEIN_LOCALIZATION_TO_SYNAPSE	18	0.500404	1.41734	0.0770751	0.220361	1	3027	tags=39%, list=16%, signal=46%
GOBP_NEUROTRANSMITTER_SECRETION	140	0.330202	1.4173	0.0157068	0.219964	1	4256	tags=26%, list=22%, signal=34%
GOBP_PROTEIN_CONTAINING_COMPLEX_DISASSEMBLY	208	0.313177	1.41711	0	0.219793	1	4558	tags=32%, list=23%, signal=42%
GOBP_EMBRYONIC_HEART_TUBE_MORPHOGENESIS	68	0.373724	1.41694	0.0398126	0.219544	1	2603	tags=24%, list=13%, signal=27%
GOBP_GRANULOCYTE_DIFFERENTIATION	35	0.427387	1.41575	0.0619266	0.220865	1	3555	tags=34%, list=18%, signal=42%
GOBP_NEGATIVE_REGULATION_OF_NEURON_DIFFERENTIATION	68	0.371447	1.41555	0.0383693	0.220739	1	4522	tags=31%, list=23%, signal=40%
GOBP_NEURON_DEATH_IN_RESPONSE_TO_OXIDATIVE_STRESS	29	0.449602	1.41428	0.0606695	0.222111	1	3746	tags=38%, list=19%, signal=47%
GOBP_REGULATION_OF_POTASSIUM_ION_TRANSPORT	98	0.350948	1.41396	0.0179949	0.22207	1	2044	tags=19%, list=11%, signal=22%
GOBP_CARDIAC_VENTRICLE_MORPHOGENESIS	70	0.371554	1.4139	0.0372093	0.221697	1	6282	tags=49%, list=32%, signal=72%
GOBP_ESTABLISHMENT_OR_MAINTENANCE_OF_CELL_POLARITY	202	0.311154	1.41353	0.00887574	0.221745	1	1743	tags=18%, list=9%, signal=19%
GOBP_REGULATED_EXOCYTOSIS	229	0.311634	1.41312	0	0.221877	1	3739	tags=25%, list=19%, signal=31%
GOBP_REGULATION_OF_PROTEIN_POLYMERIZATION	175	0.319342	1.41253	0.008	0.22224	1	2998	tags=27%, list=15%, signal=31%
GOBP_RESPONSE_TO_ELECTRICAL_STIMULUS	39	0.419717	1.41241	0.0686695	0.221953	1	3508	tags=36%, list=18%, signal=44%
GOBP_CHONDROCYTE_DIFFERENTIATION	99	0.353785	1.41151	0.0239808	0.222855	1	3027	tags=25%, list=16%, signal=30%
GOBP_REGULATION_OF_GLUCOSE_METABOLIC_PROCESS	109	0.339763	1.41087	0.0269608	0.223302	1	3666	tags=31%, list=19%, signal=38%
GOBP_TRANSCRIPTION_ELONGATION_FROM_RNA_POLYMERASE_II_PROMOTER	51	0.38739	1.41087	0.0416667	0.222847	1	2630	tags=33%, list=14%, signal=38%
GOBP_NEGATIVE_REGULATION_OF_RNA_CATABOLIC_PROCESS	64	0.376898	1.41036	0.0369565	0.223126	1	3247	tags=30%, list=17%, signal=36%
GOBP_ACTOMYOSIN_STRUCTURE_ORGANIZATION	185	0.317939	1.40953	0.0138122	0.22384	1	3098	tags=25%, list=16%, signal=30%
GOBP_PROTEIN_LOCALIZATION_TO_ENDOSOME	22	0.46165	1.4095	0.0885312	0.223431	1	4998	tags=55%, list=26%, signal=73%
GOBP_POSITIVE_REGULATION_OF_INSULIN_SECRETION_INVOLVED_IN_CELLULAR_RESPONSE_TO_GLUCOSE_STIMULUS	26	0.451729	1.40903	0.0620843	0.223759	1	2502	tags=31%, list=13%, signal=35%
GOBP_REGULATION_OF_CELL_DEVELOPMENT	463	0.285083	1.40889	0	0.223523	1	3132	tags=22%, list=16%, signal=26%
GOBP_RAC_PROTEIN_SIGNAL_TRANSDUCTION	40	0.418563	1.40875	0.0618102	0.223254	1	6173	tags=43%, list=32%, signal=62%
GOBP_NEGATIVE_REGULATION_OF_CARBOHYDRATE_METABOLIC_PROCESS	41	0.41482	1.40832	0.0452489	0.223408	1	3049	tags=34%, list=16%, signal=40%
GOBP_VESICLE_LOCALIZATION	173	0.323763	1.40725	0.00253165	0.224625	1	2689	tags=24%, list=14%, signal=28%
GOBP_SULFATION	22	0.471955	1.40678	0.0783898	0.224892	1	1302	tags=18%, list=7%, signal=19%
GOBP_INNER_EAR_RECEPTOR_CELL_DEVELOPMENT	39	0.415899	1.40542	0.0543478	0.226507	1	2810	tags=31%, list=14%, signal=36%
GOBP_RNA_STABILIZATION	52	0.389255	1.40529	0.0564334	0.226227	1	1898	tags=23%, list=10%, signal=26%
GOBP_SIALYLATION	19	0.486168	1.40519	0.081761	0.225944	1	2114	tags=32%, list=11%, signal=35%
GOBP_REGULATION_OF_SKELETAL_MUSCLE_CELL_DIFFERENTIATION	19	0.492205	1.40318	0.0957447	0.228388	1	3535	tags=37%, list=18%, signal=45%
GOBP_NEGATIVE_REGULATION_OF_OSTEOBLAST_DIFFERENTIATION	45	0.402817	1.40295	0.0650224	0.22828	1	2861	tags=29%, list=15%, signal=34%
GOBP_CARDIAC_CHAMBER_MORPHOGENESIS	119	0.333321	1.40257	0.0179028	0.228413	1	5980	tags=45%, list=31%, signal=65%
GOBP_CELLULAR_RESPONSE_TO_INSULIN_STIMULUS	188	0.314727	1.4017	0	0.229385	1	3419	tags=34%, list=18%, signal=41%
GOBP_POSITIVE_REGULATION_OF_CELLULAR_COMPONENT_BIOGENESIS	447	0.287215	1.40145	0	0.22931	1	2762	tags=23%, list=14%, signal=26%
GOBP_AMYLOID_PRECURSOR_PROTEIN_METABOLIC_PROCESS	67	0.371808	1.40134	0.0350467	0.229013	1	3440	tags=34%, list=18%, signal=42%
GOBP_P_BODY_ASSEMBLY	17	0.512906	1.40125	0.0808081	0.228708	1	1508	tags=24%, list=8%, signal=25%
GOBP_MYOTUBE_DIFFERENTIATION	110	0.337243	1.4012	0.0277778	0.228333	1	1784	tags=18%, list=9%, signal=20%
GOBP_AMINO_ACID_IMPORT	52	0.383656	1.40084	0.0517647	0.22843	1	2774	tags=27%, list=14%, signal=31%
GOBP_PANCREAS_DEVELOPMENT	76	0.364869	1.40061	0.0306604	0.228385	1	2709	tags=21%, list=14%, signal=24%
GOBP_NUCLEAR_TRANSCRIBED_MRNA_CATABOLIC_PROCESS_DEADENYLATION_DEPENDENT_DECAY	53	0.384356	1.39963	0.0495283	0.229431	1	5247	tags=43%, list=27%, signal=59%
GOBP_REGULATION_OF_TRANSPORTER_ACTIVITY	246	0.304868	1.39853	0.00287356	0.230791	1	2335	tags=20%, list=12%, signal=22%
GOBP_POSITIVE_REGULATION_OF_MAST_CELL_ACTIVATION_INVOLVED_IN_IMMUNE_RESPONSE	15	0.525797	1.39842	0.0858896	0.230506	1	2641	tags=33%, list=14%, signal=39%
GOBP_POSITIVE_REGULATION_OF_EPITHELIAL_TO_MESENCHYMAL_TRANSITION	46	0.396129	1.39808	0.0555556	0.230511	1	954	tags=15%, list=5%, signal=16%
GOBP_RNA_MEDIATED_GENE_SILENCING_BY_INHIBITION_OF_TRANSLATION	15	0.515629	1.39657	0.106918	0.232234	1	1805	tags=40%, list=9%, signal=44%
GOBP_STEROID_HORMONE_MEDIATED_SIGNALING_PATHWAY	120	0.336175	1.3964	0.0200501	0.232075	1	2884	tags=23%, list=15%, signal=26%
GOBP_SMAD_PROTEIN_SIGNAL_TRANSDUCTION	80	0.35493	1.39545	0.0220049	0.232964	1	4292	tags=34%, list=22%, signal=43%
GOBP_REGULATION_OF_ACTIN_FILAMENT_BASED_PROCESS	350	0.295078	1.39507	0.0058309	0.233017	1	3098	tags=25%, list=16%, signal=29%
GOBP_POSITIVE_REGULATION_OF_GLUCOSE_TRANSMEMBRANE_TRANSPORT	40	0.418353	1.39362	0.0722892	0.234797	1	2131	tags=20%, list=11%, signal=22%
GOBP_REGULATION_OF_NEUROGENESIS	337	0.293539	1.3935	0.00292398	0.234583	1	3132	tags=23%, list=16%, signal=27%
GOBP_REGULATION_OF_INTRINSIC_APOPTOTIC_SIGNALING_PATHWAY_BY_P53_CLASS_MEDIATOR	26	0.447112	1.39312	0.090703	0.234697	1	2880	tags=35%, list=15%, signal=41%
GOBP_NOTOCHORD_DEVELOPMENT	18	0.49094	1.39257	0.083151	0.235122	1	893	tags=22%, list=5%, signal=23%
GOBP_RESPONSE_TO_BMP	155	0.317408	1.39206	0.0213904	0.235483	1	3013	tags=21%, list=16%, signal=25%
GOBP_ORGANIC_ACID_TRANSMEMBRANE_TRANSPORT	143	0.330302	1.39123	0.0216802	0.236249	1	2899	tags=24%, list=15%, signal=29%
GOBP_EPIBOLY	31	0.435939	1.3899	0.0847458	0.237873	1	3098	tags=39%, list=16%, signal=46%
GOBP_POSITIVE_REGULATION_OF_TRIGLYCERIDE_METABOLIC_PROCESS	20	0.477414	1.38919	0.0791209	0.238503	1	979	tags=15%, list=5%, signal=16%
GOBP_SODIUM_ION_TRANSMEMBRANE_TRANSPORT	165	0.315457	1.38906	0.0108992	0.238251	1	3068	tags=20%, list=16%, signal=24%
GOBP_RNA_SPLICING	357	0.292026	1.38847	0.00934579	0.238675	1	4261	tags=30%, list=22%, signal=37%
GOBP_FATTY_ACID_BETA_OXIDATION	72	0.365149	1.38823	0.0391705	0.238549	1	4632	tags=39%, list=24%, signal=51%
GOBP_RNA_DESTABILIZATION	79	0.360249	1.38822	0.0334928	0.23812	1	4237	tags=37%, list=22%, signal=47%
GOBP_ORGANIC_CYCLIC_COMPOUND_CATABOLIC_PROCESS	436	0.283534	1.38814	0	0.237782	1	2111	tags=19%, list=11%, signal=21%
GOBP_REGULATION_OF_OXIDATIVE_STRESS_INDUCED_CELL_DEATH	63	0.370412	1.38786	0.040201	0.237755	1	2002	tags=25%, list=10%, signal=28%
GOBP_POSITIVE_REGULATION_OF_RNA_SPLICING	32	0.437157	1.38686	0.0623608	0.238829	1	2596	tags=25%, list=13%, signal=29%
GOBP_REGULATION_OF_NEURON_DIFFERENTIATION	180	0.314083	1.38676	0.0205279	0.238528	1	2452	tags=19%, list=13%, signal=21%
GOBP_ADULT_BEHAVIOR	132	0.326128	1.38589	0.0135135	0.23952	1	5346	tags=35%, list=28%, signal=48%
GOBP_NEGATIVE_REGULATION_OF_WNT_SIGNALING_PATHWAY	161	0.319845	1.38541	0.0150376	0.239822	1	2981	tags=26%, list=15%, signal=31%
GOBP_LOCOMOTORY_BEHAVIOR	185	0.308911	1.38504	0.0052356	0.239935	1	2898	tags=22%, list=15%, signal=25%
GOBP_CELL_DIFFERENTIATION_IN_SPINAL_CORD	50	0.380422	1.38498	0.0429185	0.239553	1	2861	tags=22%, list=15%, signal=26%
GOBP_REGULATION_OF_ACTIN_FILAMENT_ORGANIZATION	234	0.306004	1.38373	0.00898204	0.241198	1	3098	tags=25%, list=16%, signal=29%
GOBP_SUPEROXIDE_ANION_GENERATION	39	0.409218	1.38353	0.0825893	0.24105	1	3624	tags=31%, list=19%, signal=38%
GOBP_NUCLEOSOME_MOBILIZATION	18	0.489446	1.38308	0.0826271	0.241267	1	433	tags=17%, list=2%, signal=17%
GOBP_CELLULAR_COMPONENT_DISASSEMBLY_INVOLVED_IN_EXECUTION_PHASE_OF_APOPTOSIS	27	0.446483	1.38305	0.0714286	0.240881	1	1864	tags=33%, list=10%, signal=37%
GOBP_PROTEIN_TRIMERIZATION	17	0.499594	1.38264	0.0957684	0.241076	1	864	tags=18%, list=4%, signal=18%
GOBP_ACIDIC_AMINO_ACID_TRANSPORT	61	0.370566	1.38245	0.0594966	0.24094	1	2838	tags=26%, list=15%, signal=31%
GOBP_HISTONE_H4_K16_ACETYLATION	24	0.455867	1.38232	0.0897959	0.2407	1	4605	tags=42%, list=24%, signal=55%
GOBP_NEGATIVE_REGULATION_OF_ORGAN_GROWTH	28	0.438269	1.38231	0.0993658	0.240281	1	5184	tags=50%, list=27%, signal=68%
GOBP_CORTICAL_CYTOSKELETON_ORGANIZATION	58	0.378135	1.38214	0.0572082	0.240078	1	1859	tags=24%, list=10%, signal=27%
GOBP_DNA_TEMPLATED_TRANSCRIPTION_ELONGATION	67	0.370225	1.38176	0.0362812	0.240235	1	4013	tags=39%, list=21%, signal=49%
GOBP_INTEGRIN_MEDIATED_SIGNALING_PATHWAY	95	0.342685	1.38157	0.030445	0.240107	1	1298	tags=16%, list=7%, signal=17%
GOBP_POSITIVE_REGULATION_OF_GLYCOPROTEIN_METABOLIC_PROCESS	25	0.451946	1.38117	0.0995763	0.240196	1	3377	tags=40%, list=17%, signal=48%
GOBP_STRESS_FIBER_ASSEMBLY	99	0.344313	1.3805	0.0252294	0.240788	1	2153	tags=21%, list=11%, signal=24%
GOBP_POSITIVE_REGULATION_OF_CELL_DEVELOPMENT	282	0.292987	1.38004	0.00802139	0.241028	1	3098	tags=22%, list=16%, signal=26%
GOBP_NEGATIVE_REGULATION_OF_LOCOMOTION	293	0.293364	1.37985	0.00884956	0.240861	1	2531	tags=20%, list=13%, signal=23%
GOBP_NEGATIVE_REGULATION_OF_DEVELOPMENTAL_GROWTH	97	0.338872	1.37962	0.04914	0.240774	1	2973	tags=28%, list=15%, signal=33%
GOBP_CELL_CELL_SIGNALING_INVOLVED_IN_CARDIAC_CONDUCTION	31	0.42778	1.37945	0.0772727	0.240597	1	6701	tags=58%, list=35%, signal=89%
GOBP_LONG_TERM_SYNAPTIC_DEPRESSION	29	0.434107	1.37899	0.0752688	0.240834	1	5055	tags=41%, list=26%, signal=56%
GOBP_POSITIVE_REGULATION_OF_ION_TRANSPORT	251	0.298488	1.37741	0.017341	0.2428	1	2655	tags=19%, list=14%, signal=22%
GOBP_REGULATION_OF_RESPONSE_TO_OXIDATIVE_STRESS	82	0.35336	1.37693	0.0327869	0.243088	1	2002	tags=23%, list=10%, signal=26%
GOBP_INHIBITORY_SYNAPSE_ASSEMBLY	15	0.513489	1.37662	0.0952381	0.243152	1	470	tags=20%, list=2%, signal=20%
GOBP_AMINO_ACID_IMPORT_ACROSS_PLASMA_MEMBRANE	44	0.395426	1.37657	0.0749415	0.242793	1	2774	tags=30%, list=14%, signal=34%
GOBP_SPHINGOID_METABOLIC_PROCESS	20	0.474768	1.37605	0.0954357	0.243128	1	2582	tags=25%, list=13%, signal=29%
GOBP_LEARNING	136	0.324582	1.37587	0.026178	0.242943	1	2821	tags=23%, list=15%, signal=26%
GOBP_NEGATIVE_REGULATION_OF_EPITHELIAL_TO_MESENCHYMAL_TRANSITION	33	0.42237	1.37563	0.0767591	0.242845	1	4100	tags=45%, list=21%, signal=58%
GOBP_NEGATIVE_REGULATION_OF_INFLAMMATORY_RESPONSE_TO_ANTIGENIC_STIMULUS	25	0.444551	1.37544	0.0869565	0.242724	1	3183	tags=32%, list=16%, signal=38%
GOBP_CARBOHYDRATE_HOMEOSTASIS	214	0.302489	1.37416	0.00514139	0.244144	1	2502	tags=21%, list=13%, signal=24%
GOBP_LIPID_DROPLET_ORGANIZATION	23	0.4563	1.3741	0.0882353	0.243834	1	1359	tags=17%, list=7%, signal=19%
GOBP_ACTIN_POLYMERIZATION_OR_DEPOLYMERIZATION	172	0.315259	1.37391	0.013369	0.243703	1	2998	tags=26%, list=15%, signal=30%
GOBP_NEGATIVE_REGULATION_OF_VASCULATURE_DEVELOPMENT	91	0.340397	1.37295	0.0352941	0.244785	1	1371	tags=19%, list=7%, signal=20%
GOBP_CELLULAR_NITROGEN_COMPOUND_CATABOLIC_PROCESS	396	0.283527	1.37269	0	0.244733	1	2111	tags=19%, list=11%, signal=21%
GOBP_POSITIVE_REGULATION_OF_NEUROTRANSMITTER_SECRETION	17	0.504024	1.37203	0.101053	0.245374	1	1118	tags=18%, list=6%, signal=19%
GOBP_REGULATION_OF_PROTEIN_DEPHOSPHORYLATION	81	0.350734	1.37169	0.0329412	0.245456	1	3632	tags=35%, list=19%, signal=42%
GOBP_REGULATION_OF_SYNAPSE_STRUCTURE_OR_ACTIVITY	199	0.301775	1.37123	0.005291	0.245718	1	3391	tags=26%, list=17%, signal=31%
GOBP_NEGATIVE_REGULATION_OF_PROTEIN_CONTAINING_COMPLEX_ASSEMBLY	125	0.325439	1.37078	0.0246575	0.24596	1	2969	tags=24%, list=15%, signal=28%
GOBP_NEGATIVE_REGULATION_OF_TOR_SIGNALING	33	0.414433	1.37032	0.0700637	0.246251	1	3600	tags=42%, list=19%, signal=52%
GOBP_REGULATION_OF_HISTONE_MODIFICATION	166	0.312972	1.37007	0.0110803	0.246229	1	2888	tags=26%, list=15%, signal=30%
GOBP_L_AMINO_ACID_TRANSPORT	61	0.372866	1.36991	0.0405405	0.246032	1	2838	tags=30%, list=15%, signal=34%
GOBP_REGULATION_OF_HISTONE_METHYLATION	71	0.363296	1.36906	0.0451467	0.246847	1	4682	tags=44%, list=24%, signal=57%
GOBP_NEGATIVE_REGULATION_OF_CELLULAR_CATABOLIC_PROCESS	226	0.301227	1.36743	0.0108696	0.248984	1	2949	tags=24%, list=15%, signal=28%
GOBP_MAMMARY_GLAND_DEVELOPMENT	131	0.321558	1.36741	0.0216216	0.248594	1	2537	tags=26%, list=13%, signal=30%
GOBP_NERVE_DEVELOPMENT	80	0.352949	1.36711	0.0425532	0.248645	1	2753	tags=21%, list=14%, signal=25%
GOBP_DNA_METHYLATION_OR_DEMETHYLATION	88	0.340579	1.36695	0.0418605	0.248434	1	4442	tags=34%, list=23%, signal=44%
GOBP_REGULATION_OF_RESPONSE_TO_REACTIVE_OXYGEN_SPECIES	29	0.433073	1.36685	0.0802603	0.248184	1	1461	tags=28%, list=8%, signal=30%
GOBP_CRANIAL_NERVE_MORPHOGENESIS	28	0.43734	1.36678	0.0757895	0.247856	1	2753	tags=18%, list=14%, signal=21%
GOBP_PROTEIN_O_LINKED_GLYCOSYLATION	80	0.344677	1.36587	0.0249377	0.248812	1	2141	tags=23%, list=11%, signal=25%
GOBP_HINDBRAIN_DEVELOPMENT	142	0.320266	1.36537	0.0187668	0.249246	1	1775	tags=18%, list=9%, signal=19%
GOBP_VISUAL_BEHAVIOR	44	0.390312	1.36527	0.0709382	0.248958	1	2867	tags=27%, list=15%, signal=32%
GOBP_TRANSPORT_ALONG_MICROTUBULE	141	0.319174	1.3646	0.0223881	0.249588	1	3837	tags=30%, list=20%, signal=38%
GOBP_REGULATION_OF_COLLATERAL_SPROUTING	17	0.499531	1.36427	0.103837	0.24968	1	1751	tags=24%, list=9%, signal=26%
GOBP_REGULATION_OF_GENE_SILENCING_BY_RNA	45	0.393856	1.3641	0.0647482	0.249534	1	2888	tags=31%, list=15%, signal=36%
GOBP_REGULATION_OF_ANIMAL_ORGAN_MORPHOGENESIS	124	0.32649	1.36371	0.0178571	0.249691	1	4072	tags=28%, list=21%, signal=35%
GOBP_CELLULAR_COMPONENT_DISASSEMBLY	404	0.279936	1.36329	0	0.249931	1	4368	tags=32%, list=23%, signal=40%
GOBP_CENTRAL_NERVOUS_SYSTEM_NEURON_AXONOGENESIS	32	0.417734	1.36311	0.0736196	0.249786	1	2162	tags=25%, list=11%, signal=28%
GOBP_REGULATION_OF_DNA_TEMPLATED_TRANSCRIPTION_ELONGATION	47	0.37815	1.36287	0.0580046	0.249702	1	2894	tags=34%, list=15%, signal=40%
GOBP_REGULATION_OF_TRANS_SYNAPTIC_SIGNALING	395	0.282176	1.36283	0	0.249357	1	3027	tags=21%, list=16%, signal=24%
GOBP_NEGATIVE_REGULATION_OF_BMP_SIGNALING_PATHWAY	52	0.379181	1.36281	0.0549451	0.248965	1	2346	tags=23%, list=12%, signal=26%
GOBP_REGULATION_OF_NEUROTRANSMITTER_RECEPTOR_ACTIVITY	58	0.374166	1.36227	0.0652681	0.249366	1	2161	tags=22%, list=11%, signal=25%
GOBP_SYNAPSE_ORGANIZATION	394	0.281588	1.36216	0	0.249105	1	3636	tags=23%, list=19%, signal=28%
GOBP_TRANSCRIPTION_BY_RNA_POLYMERASE_I	43	0.391278	1.36139	0.0859729	0.24986	1	1824	tags=21%, list=9%, signal=23%
GOBP_DOPAMINERGIC_NEURON_DIFFERENTIATION	36	0.41039	1.36127	0.0730689	0.249647	1	2382	tags=25%, list=12%, signal=28%
GOBP_POSITIVE_REGULATION_OF_POSTTRANSCRIPTIONAL_GENE_SILENCING	31	0.419662	1.3612	0.0877944	0.24935	1	2888	tags=35%, list=15%, signal=42%
GOBP_TRNA_METHYLATION	39	0.396826	1.36096	0.0859031	0.249259	1	4790	tags=38%, list=25%, signal=51%
GOBP_POST_GOLGI_VESICLE_MEDIATED_TRANSPORT	93	0.339115	1.36023	0.0577889	0.249953	1	2751	tags=25%, list=14%, signal=29%
GOBP_NEGATIVE_REGULATION_OF_NEURON_DEATH	186	0.309702	1.35953	0.013089	0.250706	1	2273	tags=19%, list=12%, signal=22%
GOBP_DEPHOSPHORYLATION	375	0.280127	1.35908	0.00332226	0.250996	1	4811	tags=34%, list=25%, signal=45%
GOBP_TRABECULA_MORPHOGENESIS	44	0.396225	1.35896	0.0672451	0.250755	1	3641	tags=36%, list=19%, signal=45%
GOBP_CELLULAR_RESPONSE_TO_AMYLOID_BETA	42	0.386499	1.35875	0.0798226	0.250683	1	4476	tags=38%, list=23%, signal=49%
GOBP_IMPORT_ACROSS_PLASMA_MEMBRANE	169	0.307226	1.35844	0.0108108	0.250764	1	3091	tags=24%, list=16%, signal=28%
GOBP_GLIOGENESIS	272	0.289136	1.35765	0.00626959	0.251533	1	2561	tags=21%, list=13%, signal=24%
GOBP_REGULATION_OF_LONG_TERM_NEURONAL_SYNAPTIC_PLASTICITY	22	0.460157	1.35738	0.103448	0.251538	1	2422	tags=32%, list=12%, signal=36%
GOBP_REGULATION_OF_EPITHELIAL_CELL_MIGRATION	210	0.299668	1.35695	0.0108108	0.251788	1	2764	tags=23%, list=14%, signal=26%
GOBP_PARAXIAL_MESODERM_DEVELOPMENT	17	0.482432	1.35615	0.105495	0.25258	1	4292	tags=41%, list=22%, signal=53%
GOBP_REGULATION_OF_CELLULAR_CARBOHYDRATE_METABOLIC_PROCESS	135	0.316325	1.35594	0.02	0.252502	1	3346	tags=28%, list=17%, signal=34%
GOBP_NEGATIVE_REGULATION_OF_CELLULAR_AMIDE_METABOLIC_PROCESS	166	0.310569	1.35539	0.0241287	0.25293	1	4237	tags=33%, list=22%, signal=41%
GOBP_PROTEIN_LOCALIZATION_TO_VACUOLE	60	0.362004	1.35499	0.0617577	0.25311	1	1635	tags=18%, list=8%, signal=20%
GOBP_L_ALPHA_AMINO_ACID_TRANSMEMBRANE_TRANSPORT	59	0.369636	1.35448	0.070922	0.253465	1	2838	tags=29%, list=15%, signal=34%
GOBP_AMINO_ACID_TRANSPORT	141	0.314779	1.35437	0.0155039	0.253218	1	2838	tags=21%, list=15%, signal=25%
GOBP_DSRNA_PROCESSING	49	0.378229	1.35383	0.0482456	0.253628	1	5314	tags=43%, list=27%, signal=59%
GOBP_RESPONSE_TO_EPIDERMAL_GROWTH_FACTOR	42	0.389799	1.35356	0.0865604	0.253632	1	2804	tags=31%, list=14%, signal=36%
GOBP_CELL_DIFFERENTIATION_IN_HINDBRAIN	21	0.466122	1.3535	0.105906	0.253295	1	730	tags=19%, list=4%, signal=20%
GOBP_LONG_CHAIN_FATTY_ACYL_COA_BIOSYNTHETIC_PROCESS	17	0.494108	1.35257	0.117761	0.25429	1	2925	tags=35%, list=15%, signal=42%
GOBP_REGULATION_OF_TRANSCRIPTION_ELONGATION_FROM_RNA_POLYMERASE_II_PROMOTER	34	0.421985	1.35204	0.0885529	0.254676	1	2630	tags=38%, list=14%, signal=44%
GOBP_ENDOTHELIAL_CELL_APOPTOTIC_PROCESS	53	0.366803	1.35172	0.064877	0.254723	1	1155	tags=21%, list=6%, signal=22%
GOBP_BLOOD_VESSEL_REMODELING	40	0.390242	1.35132	0.0877193	0.254921	1	1739	tags=20%, list=9%, signal=22%
GOBP_MIDBRAIN_DEVELOPMENT	86	0.341986	1.35096	0.0456853	0.255095	1	4157	tags=35%, list=21%, signal=44%
GOBP_MESODERMAL_CELL_FATE_COMMITMENT	17	0.477095	1.3509	0.110879	0.254779	1	2940	tags=29%, list=15%, signal=35%
GOBP_NEGATIVE_REGULATION_OF_CELL_SUBSTRATE_ADHESION	56	0.370497	1.3502	0.0686499	0.255509	1	2361	tags=29%, list=12%, signal=32%
GOBP_SOMITOGENESIS	61	0.358607	1.35015	0.0517241	0.255189	1	2484	tags=21%, list=13%, signal=24%
GOBP_OSTEOBLAST_DIFFERENTIATION	211	0.301874	1.35013	0.013624	0.254826	1	3660	tags=25%, list=19%, signal=30%
GOBP_NEGATIVE_REGULATION_OF_SIGNAL_TRANSDUCTION_BY_P53_CLASS_MEDIATOR	27	0.443236	1.34903	0.0795918	0.256062	1	2915	tags=41%, list=15%, signal=48%
GOBP_PEPTIDYL_SERINE_MODIFICATION	313	0.284435	1.34868	0	0.256182	1	2372	tags=20%, list=12%, signal=23%
GOBP_REGULATION_OF_CELL_SUBSTRATE_JUNCTION_ORGANIZATION	62	0.369039	1.34773	0.0724299	0.257283	1	3602	tags=40%, list=19%, signal=49%
GOBP_DNA_TEMPLATED_TRANSCRIPTION_TERMINATION	16	0.493339	1.34724	0.103004	0.257645	1	1940	tags=31%, list=10%, signal=35%
GOBP_CORONARY_VASCULATURE_DEVELOPMENT	46	0.387407	1.34702	0.0790698	0.257554	1	5927	tags=52%, list=31%, signal=75%
GOBP_TELENCEPHALON_GLIAL_CELL_MIGRATION	21	0.45089	1.34676	0.117895	0.257511	1	928	tags=19%, list=5%, signal=20%
GOBP_SNRNA_PROCESSING	22	0.457829	1.34675	0.132898	0.257119	1	1738	tags=23%, list=9%, signal=25%
GOBP_SERTOLI_CELL_DIFFERENTIATION	17	0.487959	1.34651	0.10559	0.257121	1	2742	tags=35%, list=14%, signal=41%
GOBP_NEGATIVE_REGULATION_OF_NEURON_PROJECTION_REGENERATION	15	0.496251	1.34556	0.124	0.258162	1	3230	tags=40%, list=17%, signal=48%
GOBP_ORGANIC_ACID_CATABOLIC_PROCESS	227	0.294003	1.34447	0.0198864	0.259544	1	4632	tags=35%, list=24%, signal=45%
GOBP_APICAL_PROTEIN_LOCALIZATION	15	0.498859	1.34437	0.134737	0.259291	1	2155	tags=47%, list=11%, signal=52%
GOBP_HOMEOSTASIS_OF_NUMBER_OF_CELLS_WITHIN_A_TISSUE	28	0.43327	1.34435	0.106838	0.258916	1	447	tags=14%, list=2%, signal=15%
GOBP_NEGATIVE_REGULATION_OF_MYELOID_CELL_DIFFERENTIATION	73	0.346864	1.34426	0.0501139	0.258619	1	1672	tags=19%, list=9%, signal=21%
GOBP_DENDRITE_EXTENSION	34	0.408015	1.34393	0.0932203	0.258686	1	5942	tags=47%, list=31%, signal=68%
GOBP_REGULATION_OF_MRNA_POLYADENYLATION	18	0.469374	1.34369	0.115721	0.258663	1	2378	tags=33%, list=12%, signal=38%
GOBP_NUCLEUS_LOCALIZATION	22	0.453883	1.34356	0.105376	0.258431	1	6050	tags=55%, list=31%, signal=79%
GOBP_CELLULAR_RESPONSE_TO_GROWTH_HORMONE_STIMULUS	23	0.457423	1.3417	0.109705	0.260879	1	3541	tags=39%, list=18%, signal=48%
GOBP_NEGATIVE_REGULATION_OF_MYELOID_LEUKOCYTE_DIFFERENTIATION	47	0.381308	1.34147	0.0762332	0.260855	1	3093	tags=28%, list=16%, signal=33%
GOBP_POLYSACCHARIDE_METABOLIC_PROCESS	97	0.338391	1.34043	0.0456621	0.262202	1	4381	tags=34%, list=23%, signal=44%
GOBP_EAR_DEVELOPMENT	207	0.301194	1.33973	0.00879765	0.262875	1	3728	tags=25%, list=19%, signal=30%
GOBP_GLAND_DEVELOPMENT	416	0.275787	1.33746	0.00660066	0.2661	1	3001	tags=23%, list=15%, signal=27%
GOBP_REGULATION_OF_MYOTUBE_DIFFERENTIATION	40	0.399205	1.33725	0.08061	0.266074	1	2836	tags=28%, list=15%, signal=32%
GOBP_REGULATION_OF_LIPID_CATABOLIC_PROCESS	54	0.36655	1.33719	0.0715884	0.265776	1	3547	tags=33%, list=18%, signal=41%
GOBP_URETER_DEVELOPMENT	17	0.482538	1.33559	0.112088	0.267959	1	996	tags=18%, list=5%, signal=19%
GOBP_RNA_METHYLATION	73	0.355721	1.33499	0.0487805	0.268495	1	4813	tags=36%, list=25%, signal=47%
GOBP_MECHANORECEPTOR_DIFFERENTIATION	59	0.357913	1.33439	0.0870588	0.269021	1	3641	tags=31%, list=19%, signal=37%
GOBP_GENE_SILENCING_BY_RNA	102	0.329983	1.33403	0.0610687	0.269296	1	4746	tags=38%, list=24%, signal=50%
GOBP_NEURONAL_ACTION_POTENTIAL	33	0.415134	1.33392	0.104803	0.269061	1	3656	tags=30%, list=19%, signal=37%
GOBP_REGULATION_OF_MRNA_3_END_PROCESSING	25	0.439602	1.3338	0.120536	0.268847	1	2378	tags=28%, list=12%, signal=32%
GOBP_NEGATIVE_REGULATION_OF_CATABOLIC_PROCESS	280	0.285128	1.33357	0.00566572	0.268811	1	2949	tags=24%, list=15%, signal=28%
GOBP_POSITIVE_REGULATION_OF_BMP_SIGNALING_PATHWAY	35	0.4065	1.33335	0.0964912	0.268731	1	2346	tags=23%, list=12%, signal=26%
GOBP_HOMOTYPIC_CELL_CELL_ADHESION	88	0.335497	1.33241	0.0480769	0.269751	1	3606	tags=32%, list=19%, signal=39%
GOBP_MAMMARY_GLAND_DUCT_MORPHOGENESIS	28	0.43217	1.33234	0.127854	0.269425	1	4985	tags=54%, list=26%, signal=72%
GOBP_SODIUM_ION_TRANSPORT	230	0.293072	1.3323	0.0213333	0.269079	1	3068	tags=22%, list=16%, signal=26%
GOBP_REGULATION_OF_TRANSCRIPTION_BY_RNA_POLYMERASE_I	28	0.414682	1.33169	0.114094	0.269607	1	1004	tags=18%, list=5%, signal=19%
GOBP_RRNA_METHYLATION	20	0.468939	1.33165	0.121457	0.269271	1	4813	tags=40%, list=25%, signal=53%
GOBP_MYELOID_CELL_DIFFERENTIATION	353	0.277528	1.33165	0.00318471	0.268872	1	2550	tags=22%, list=13%, signal=24%
GOBP_SEGMENTATION	97	0.330095	1.33156	0.0430839	0.268611	1	3883	tags=27%, list=20%, signal=33%
GOBP_REGULATION_OF_PRODUCTION_OF_SMALL_RNA_INVOLVED_IN_GENE_SILENCING_BY_RNA	20	0.455289	1.33155	0.136069	0.268217	1	2686	tags=30%, list=14%, signal=35%
GOBP_TRIGLYCERIDE_CATABOLIC_PROCESS	30	0.417548	1.33069	0.10177	0.269199	1	2733	tags=27%, list=14%, signal=31%
GOBP_NEGATIVE_REGULATION_OF_TRANSMEMBRANE_RECEPTOR_PROTEIN_SERINE_THREONINE_KINASE_SIGNALING_PATHWAY	118	0.322705	1.33035	0.026455	0.269313	1	2346	tags=25%, list=12%, signal=28%
GOBP_REGULATION_OF_CHROMATIN_ASSEMBLY_OR_DISASSEMBLY	32	0.402525	1.33032	0.0989691	0.268964	1	3116	tags=31%, list=16%, signal=37%
GOBP_REGULATION_OF_PHOSPHOPROTEIN_PHOSPHATASE_ACTIVITY	52	0.365728	1.32998	0.0909091	0.269129	1	2107	tags=27%, list=11%, signal=30%
GOBP_DETECTION_OF_STIMULUS_INVOLVED_IN_SENSORY_PERCEPTION_OF_PAIN	25	0.440912	1.32988	0.138298	0.268897	1	4812	tags=44%, list=25%, signal=58%
GOBP_REGULATION_OF_PROTEIN_CONTAINING_COMPLEX_ASSEMBLY	357	0.278918	1.32984	0.00304878	0.268556	1	2998	tags=23%, list=15%, signal=27%
GOBP_POSITIVE_REGULATION_OF_TRANSMEMBRANE_RECEPTOR_PROTEIN_SERINE_THREONINE_KINASE_SIGNALING_PATHWAY	108	0.318639	1.32928	0.0294906	0.269104	1	2552	tags=22%, list=13%, signal=25%
GOBP_KERATAN_SULFATE_METABOLIC_PROCESS	16	0.484547	1.32907	0.130526	0.269003	1	1458	tags=25%, list=8%, signal=27%
GOBP_GLIAL_CELL_DIFFERENTIATION	208	0.294905	1.3289	0.0240642	0.268895	1	2410	tags=20%, list=12%, signal=23%
GOBP_BRANCHING_INVOLVED_IN_BLOOD_VESSEL_MORPHOGENESIS	33	0.395707	1.32759	0.112554	0.270602	1	1432	tags=21%, list=7%, signal=23%
GOBP_ESTABLISHMENT_OR_MAINTENANCE_OF_MONOPOLAR_CELL_POLARITY	23	0.438184	1.3268	0.113537	0.27155	1	1089	tags=17%, list=6%, signal=18%
GOBP_RESPONSE_TO_INSULIN	240	0.289739	1.32637	0.00854701	0.271806	1	3202	tags=30%, list=16%, signal=35%
GOBP_REGULATION_OF_MYELOID_LEUKOCYTE_DIFFERENTIATION	109	0.327714	1.32635	0.0573566	0.271429	1	2409	tags=21%, list=12%, signal=24%
GOBP_PROTEIN_DEPHOSPHORYLATION	268	0.287473	1.32602	0.00600601	0.271598	1	4595	tags=33%, list=24%, signal=43%
GOBP_ACTION_POTENTIAL	133	0.312709	1.3255	0.0263158	0.272036	1	5928	tags=44%, list=31%, signal=63%
GOBP_DNA_CATABOLIC_PROCESS	27	0.426965	1.32451	0.10856	0.273218	1	5222	tags=56%, list=27%, signal=76%
GOBP_PROTEIN_CONTAINING_COMPLEX_LOCALIZATION	143	0.308855	1.32435	0.0295567	0.273129	1	2535	tags=22%, list=13%, signal=25%
GOBP_NEURON_MIGRATION	153	0.303805	1.32389	0.0169492	0.273474	1	2778	tags=20%, list=14%, signal=23%
GOBP_NEUROTRANSMITTER_RECEPTOR_TRANSPORT	21	0.450519	1.32361	0.131148	0.273538	1	1977	tags=19%, list=10%, signal=21%
GOBP_THYMUS_DEVELOPMENT	45	0.377076	1.32227	0.0769231	0.275282	1	2804	tags=27%, list=14%, signal=31%
GOBP_NEGATIVE_REGULATION_OF_PROTEIN_LOCALIZATION_TO_NUCLEUS	33	0.406259	1.32152	0.111111	0.276151	1	3498	tags=36%, list=18%, signal=44%
GOBP_FAT_CELL_DIFFERENTIATION	214	0.292572	1.32124	0.0238727	0.276177	1	3098	tags=25%, list=16%, signal=29%
GOBP_POSITIVE_REGULATION_OF_NEURON_DEATH	80	0.334223	1.32063	0.0550239	0.276748	1	4305	tags=36%, list=22%, signal=46%
GOBP_REGULATION_OF_ACTIN_FILAMENT_LENGTH	138	0.306217	1.32062	0.0502645	0.276351	1	2998	tags=25%, list=15%, signal=30%
GOBP_MACROPHAGE_DIFFERENTIATION	47	0.368681	1.32057	0.0840517	0.276042	1	3636	tags=38%, list=19%, signal=47%
GOBP_ACTIN_FILAMENT_BUNDLE_ORGANIZATION	148	0.302214	1.32033	0.0338542	0.275991	1	2159	tags=20%, list=11%, signal=23%
GOBP_REGULATION_OF_FAT_CELL_DIFFERENTIATION	125	0.313747	1.32011	0.0412844	0.275915	1	4154	tags=35%, list=21%, signal=44%
GOBP_CENTRAL_NERVOUS_SYSTEM_NEURON_DIFFERENTIATION	162	0.299899	1.31995	0.0263158	0.27577	1	2603	tags=16%, list=13%, signal=18%
GOBP_EPITHELIAL_STRUCTURE_MAINTENANCE	30	0.410379	1.31909	0.127835	0.276805	1	1838	tags=27%, list=9%, signal=29%
GOBP_GANGLIOSIDE_BIOSYNTHETIC_PROCESS	15	0.489668	1.31738	0.148676	0.27909	1	4233	tags=53%, list=22%, signal=68%
GOBP_ADULT_LOCOMOTORY_BEHAVIOR	73	0.346329	1.31728	0.0747663	0.278851	1	5079	tags=32%, list=26%, signal=43%
GOBP_RNA_INTERFERENCE	17	0.471503	1.31647	0.154321	0.279782	1	5314	tags=59%, list=27%, signal=81%
GOBP_REGULATION_OF_SODIUM_ION_TRANSPORT	79	0.338242	1.31645	0.0665025	0.279412	1	3377	tags=30%, list=17%, signal=37%
GOBP_SULFUR_COMPOUND_METABOLIC_PROCESS	306	0.27728	1.31644	0.00625	0.279026	1	3368	tags=25%, list=17%, signal=29%
GOBP_ARTERY_DEVELOPMENT	94	0.324619	1.31643	0.0457831	0.278642	1	2899	tags=22%, list=15%, signal=26%
GOBP_INSULIN_SECRETION	171	0.29959	1.31574	0.0289474	0.279401	1	2837	tags=23%, list=15%, signal=26%
GOBP_SPINAL_CORD_MOTOR_NEURON_DIFFERENTIATION	30	0.413967	1.31564	0.107724	0.279172	1	2861	tags=23%, list=15%, signal=27%
GOBP_TRANSCRIPTION_INITIATION_FROM_RNA_POLYMERASE_II_PROMOTER	70	0.346363	1.31555	0.0638298	0.27895	1	5247	tags=41%, list=27%, signal=57%
GOBP_FOCAL_ADHESION_ASSEMBLY	75	0.335597	1.3152	0.0700483	0.279144	1	3602	tags=33%, list=19%, signal=41%
GOBP_NUCLEOSOME_ORGANIZATION	94	0.329484	1.31415	0.0585366	0.280433	1	3000	tags=29%, list=15%, signal=34%
GOBP_L_GLUTAMATE_TRANSMEMBRANE_TRANSPORT	28	0.425282	1.31354	0.146288	0.28098	1	2838	tags=32%, list=15%, signal=38%
GOBP_POSITIVE_REGULATION_OF_WNT_SIGNALING_PATHWAY	133	0.307028	1.31315	0.0201005	0.281223	1	2981	tags=25%, list=15%, signal=29%
GOBP_NEGATIVE_REGULATION_OF_MIRNA_TRANSCRIPTION	18	0.464389	1.3128	0.140693	0.281425	1	1432	tags=22%, list=7%, signal=24%
GOBP_EPITHELIAL_CELL_APOPTOTIC_PROCESS	101	0.327124	1.31223	0.0382023	0.28201	1	2372	tags=24%, list=12%, signal=27%
GOBP_AMINOGLYCAN_METABOLIC_PROCESS	126	0.315923	1.31054	0.0343137	0.284408	1	2076	tags=15%, list=11%, signal=17%
GOBP_CELLULAR_RESPONSE_TO_PEPTIDE	332	0.275997	1.31033	0.0149254	0.284387	1	3202	tags=29%, list=16%, signal=34%
GOBP_POSITIVE_REGULATION_OF_CELL_MATRIX_ADHESION	52	0.367057	1.31028	0.0762527	0.284062	1	2448	tags=37%, list=13%, signal=42%
GOBP_VENOUS_BLOOD_VESSEL_DEVELOPMENT	16	0.470115	1.30997	0.134298	0.284239	1	2346	tags=31%, list=12%, signal=36%
GOBP_REGULATION_OF_PROTEIN_TARGETING	74	0.339279	1.30965	0.076555	0.284342	1	986	tags=15%, list=5%, signal=16%
GOBP_ANION_TRANSMEMBRANE_TRANSPORT	235	0.28277	1.30948	0.017341	0.284271	1	3125	tags=23%, list=16%, signal=28%
GOBP_NEURAL_PRECURSOR_CELL_PROLIFERATION	135	0.306652	1.309	0.0538462	0.284634	1	2391	tags=20%, list=12%, signal=23%
GOBP_REGULATION_OF_FIBROBLAST_GROWTH_FACTOR_RECEPTOR_SIGNALING_PATHWAY	31	0.402364	1.30893	0.127119	0.28433	1	5579	tags=42%, list=29%, signal=59%
GOBP_NEGATIVE_REGULATION_OF_PHOSPHORUS_METABOLIC_PROCESS	386	0.271249	1.30891	0.0126984	0.283965	1	3121	tags=27%, list=16%, signal=31%
GOBP_POSITIVE_REGULATION_OF_NEUROTRANSMITTER_TRANSPORT	21	0.449381	1.30809	0.126386	0.284944	1	1118	tags=14%, list=6%, signal=15%
GOBP_REGULATION_OF_CATECHOLAMINE_METABOLIC_PROCESS	18	0.46684	1.30691	0.142857	0.286555	1	986	tags=17%, list=5%, signal=18%
GOBP_MESODERMAL_CELL_DIFFERENTIATION	30	0.412912	1.30649	0.105809	0.286924	1	4292	tags=33%, list=22%, signal=43%
GOBP_REGULATION_OF_SUPRAMOLECULAR_FIBER_ORGANIZATION	319	0.272565	1.30598	0.00576369	0.287349	1	3021	tags=23%, list=16%, signal=27%
GOBP_REGULATION_OF_CHROMATIN_ORGANIZATION	41	0.392952	1.30531	0.108889	0.288104	1	3116	tags=34%, list=16%, signal=41%
GOBP_REGULATION_OF_CALCIUM_ION_DEPENDENT_EXOCYTOSIS	40	0.379223	1.30475	0.0864745	0.28866	1	4256	tags=38%, list=22%, signal=48%
GOBP_AMELOGENESIS	22	0.443503	1.30429	0.12685	0.289007	1	3014	tags=27%, list=16%, signal=32%
GOBP_REGULATION_OF_KERATINOCYTE_DIFFERENTIATION	32	0.401023	1.3042	0.122768	0.288752	1	2361	tags=38%, list=12%, signal=43%
GOBP_GLANDULAR_EPITHELIAL_CELL_DIFFERENTIATION	51	0.364484	1.30329	0.105145	0.289901	1	2709	tags=24%, list=14%, signal=27%
GOBP_REPRODUCTIVE_BEHAVIOR	26	0.418759	1.30326	0.119565	0.289547	1	2921	tags=23%, list=15%, signal=27%
GOBP_MITOCHONDRION_LOCALIZATION	47	0.364907	1.30224	0.0772727	0.290851	1	2677	tags=30%, list=14%, signal=34%
GOBP_HAIR_CELL_DIFFERENTIATION	43	0.373696	1.3018	0.104019	0.291241	1	3641	tags=35%, list=19%, signal=43%
GOBP_NEGATIVE_REGULATION_OF_ACTIN_FILAMENT_POLYMERIZATION	54	0.359406	1.30089	0.0911111	0.292435	1	4535	tags=39%, list=23%, signal=51%
GOBP_POSITIVE_REGULATION_OF_PATHWAY_RESTRICTED_SMAD_PROTEIN_PHOSPHORYLATION	46	0.377773	1.30051	0.102041	0.292683	1	4292	tags=37%, list=22%, signal=47%
GOBP_REGULATION_OF_CARDIAC_MUSCLE_CONTRACTION_BY_REGULATION_OF_THE_RELEASE_OF_SEQUESTERED_CALCIUM_ION	20	0.446127	1.30028	0.135135	0.292693	1	2107	tags=30%, list=11%, signal=34%
GOBP_ESTABLISHMENT_OF_CELL_POLARITY	131	0.30702	1.3002	0.0472637	0.292416	1	1440	tags=17%, list=7%, signal=18%
GOBP_HEART_MORPHOGENESIS	237	0.284105	1.30006	0.0228571	0.292284	1	2969	tags=21%, list=15%, signal=25%
GOBP_POSITIVE_REGULATION_OF_PROTEIN_ACETYLATION	43	0.381928	1.3	0.111359	0.291976	1	2804	tags=26%, list=14%, signal=30%
GOBP_POSITIVE_REGULATION_OF_MACROPHAGE_DIFFERENTIATION	15	0.481095	1.29907	0.153191	0.293167	1	1167	tags=33%, list=6%, signal=35%
GOBP_POSITIVE_REGULATION_OF_CELLULAR_RESPONSE_TO_TRANSFORMING_GROWTH_FACTOR_BETA_STIMULUS	30	0.40021	1.29786	0.142857	0.294797	1	2167	tags=27%, list=11%, signal=30%
GOBP_LYMPHOCYTE_HOMEOSTASIS	64	0.340562	1.29785	0.0852535	0.294401	1	4916	tags=45%, list=25%, signal=60%
GOBP_FATTY_ACID_DERIVATIVE_BIOSYNTHETIC_PROCESS	43	0.381181	1.29739	0.0899123	0.294834	1	3020	tags=35%, list=16%, signal=41%
GOBP_NUCLEAR_TRANSCRIBED_MRNA_CATABOLIC_PROCESS	104	0.321552	1.29645	0.0725995	0.296054	1	5406	tags=39%, list=28%, signal=54%
GOBP_REGULATION_OF_DEPHOSPHORYLATION	117	0.311401	1.29626	0.0507614	0.295992	1	3632	tags=29%, list=19%, signal=36%
GOBP_SPINAL_CORD_DEVELOPMENT	95	0.320364	1.29625	0.0762125	0.295626	1	2603	tags=18%, list=13%, signal=21%
GOBP_MEMBRANE_DEPOLARIZATION_DURING_ACTION_POTENTIAL	35	0.384049	1.29565	0.105832	0.296272	1	3656	tags=31%, list=19%, signal=39%
GOBP_REGULATION_OF_DEVELOPMENTAL_GROWTH	296	0.275541	1.29554	0.019774	0.296087	1	2861	tags=22%, list=15%, signal=25%
GOBP_RESPONSE_TO_MUSCLE_ACTIVITY	20	0.460526	1.29487	0.1606	0.296771	1	5918	tags=50%, list=30%, signal=72%
GOBP_NCRNA_3_END_PROCESSING	33	0.402322	1.29414	0.134831	0.297624	1	1148	tags=15%, list=6%, signal=16%
GOBP_VENTRICULAR_SEPTUM_DEVELOPMENT	67	0.351366	1.29409	0.0682353	0.297321	1	2969	tags=24%, list=15%, signal=28%
GOBP_DIENCEPHALON_DEVELOPMENT	75	0.334943	1.29396	0.0929705	0.297179	1	2348	tags=15%, list=12%, signal=17%
GOBP_REGULATION_OF_ENDOCYTOSIS	189	0.290102	1.29387	0.0348525	0.296951	1	3079	tags=23%, list=16%, signal=27%
GOBP_REGULATION_OF_MYELOID_CELL_DIFFERENTIATION	178	0.291991	1.29367	0.0314136	0.296887	1	2477	tags=21%, list=13%, signal=24%
GOBP_ARF_PROTEIN_SIGNAL_TRANSDUCTION	18	0.462158	1.29355	0.144958	0.296693	1	3982	tags=50%, list=21%, signal=63%
GOBP_MYOBLAST_DIFFERENTIATION	82	0.329917	1.29334	0.0800971	0.296649	1	2757	tags=26%, list=14%, signal=30%
GOBP_FOREBRAIN_DEVELOPMENT	357	0.271794	1.29155	0	0.299475	1	2639	tags=17%, list=14%, signal=19%
GOBP_NOTCH_SIGNALING_PATHWAY	164	0.297489	1.2912	0.0533333	0.2997	1	3767	tags=30%, list=19%, signal=38%
GOBP_POTASSIUM_ION_IMPORT_ACROSS_PLASMA_MEMBRANE	48	0.367186	1.29117	0.0932755	0.299371	1	3076	tags=23%, list=16%, signal=27%
GOBP_NEPHRON_TUBULE_FORMATION	19	0.451109	1.29001	0.153226	0.30093	1	707	tags=16%, list=4%, signal=16%
GOBP_REGULATION_OF_RAC_PROTEIN_SIGNAL_TRANSDUCTION	20	0.448175	1.28938	0.136957	0.301594	1	6173	tags=40%, list=32%, signal=59%
GOBP_REGULATION_OF_CARDIOCYTE_DIFFERENTIATION	25	0.425018	1.28843	0.130435	0.302786	1	648	tags=16%, list=3%, signal=17%
GOBP_CELLULAR_ANION_HOMEOSTASIS	15	0.484506	1.2883	0.162218	0.302607	1	2329	tags=33%, list=12%, signal=38%
GOBP_POLYSACCHARIDE_BIOSYNTHETIC_PROCESS	68	0.334089	1.2882	0.0936819	0.302367	1	4026	tags=31%, list=21%, signal=39%
GOBP_POSITIVE_REGULATION_OF_MUSCLE_CELL_DIFFERENTIATION	58	0.351485	1.28782	0.0962441	0.302699	1	2764	tags=21%, list=14%, signal=24%
GOBP_CELLULAR_RESPONSE_TO_ACIDIC_PH	16	0.481788	1.28776	0.140167	0.302434	1	5924	tags=63%, list=31%, signal=90%
GOBP_INNATE_IMMUNE_RESPONSE_ACTIVATING_SIGNAL_TRANSDUCTION	22	0.431909	1.28761	0.144654	0.302296	1	3624	tags=36%, list=19%, signal=45%
GOBP_REGULATION_OF_CATION_TRANSMEMBRANE_TRANSPORT	306	0.274569	1.28703	0.0229508	0.302927	1	3843	tags=26%, list=20%, signal=32%
GOBP_REGULATION_OF_BONE_RESORPTION	38	0.381128	1.28694	0.119403	0.302694	1	3346	tags=34%, list=17%, signal=41%
GOBP_REGULATION_OF_ANATOMICAL_STRUCTURE_SIZE	446	0.264076	1.28643	0.00664452	0.303235	1	3035	tags=20%, list=16%, signal=24%
GOBP_NEGATIVE_REGULATION_OF_CELLULAR_RESPONSE_TO_GROWTH_FACTOR_STIMULUS	95	0.321798	1.28591	0.0660377	0.303749	1	2969	tags=21%, list=15%, signal=25%
GOBP_INNER_EAR_AUDITORY_RECEPTOR_CELL_DIFFERENTIATION	35	0.38858	1.28565	0.119748	0.303822	1	3641	tags=37%, list=19%, signal=46%
GOBP_CAMERA_TYPE_EYE_MORPHOGENESIS	118	0.307149	1.28538	0.0492611	0.303943	1	2835	tags=20%, list=15%, signal=24%
GOBP_NUCLEAR_TRANSCRIBED_MRNA_POLY_A_TAIL_SHORTENING	19	0.450464	1.28529	0.151844	0.303702	1	1961	tags=37%, list=10%, signal=41%
GOBP_NEGATIVE_REGULATION_OF_OXIDATIVE_STRESS_INDUCED_CELL_DEATH	41	0.371831	1.28523	0.116998	0.303407	1	3123	tags=32%, list=16%, signal=38%
GOBP_RIBONUCLEOTIDE_CATABOLIC_PROCESS	43	0.369862	1.28438	0.0972222	0.304447	1	3284	tags=30%, list=17%, signal=36%
GOBP_CELLULAR_GLUCAN_METABOLIC_PROCESS	62	0.344348	1.28368	0.121287	0.305333	1	3855	tags=35%, list=20%, signal=44%
GOBP_SOMITE_DEVELOPMENT	80	0.324347	1.28348	0.089372	0.305263	1	2940	tags=23%, list=15%, signal=26%
GOBP_CELLULAR_RESPONSE_TO_PEPTIDE_HORMONE_STIMULUS	269	0.278123	1.28312	0.0232558	0.305478	1	3559	tags=33%, list=18%, signal=40%
GOBP_REGULATION_OF_CARDIAC_MUSCLE_CELL_DIFFERENTIATION	15	0.493983	1.28308	0.174538	0.305147	1	1763	tags=27%, list=9%, signal=29%
GOBP_MODIFICATION_OF_SYNAPTIC_STRUCTURE	19	0.446543	1.28285	0.171429	0.305189	1	3636	tags=37%, list=19%, signal=45%
GOBP_CELL_FATE_SPECIFICATION	93	0.318795	1.28265	0.0586735	0.305174	1	2940	tags=17%, list=15%, signal=20%
GOBP_TRACHEA_DEVELOPMENT	18	0.456803	1.28089	0.161616	0.307828	1	1432	tags=22%, list=7%, signal=24%
GOBP_POSITIVE_REGULATION_OF_STRESS_ACTIVATED_PROTEIN_KINASE_SIGNALING_CASCADE	124	0.302617	1.2807	0.0721925	0.307804	1	3093	tags=27%, list=16%, signal=32%
GOBP_NEGATIVE_REGULATION_OF_TRANSLATIONAL_INITIATION	16	0.473133	1.2807	0.189474	0.307424	1	2888	tags=44%, list=15%, signal=51%
GOBP_PROCESS_UTILIZING_AUTOPHAGIC_MECHANISM	487	0.258764	1.28048	0.00348432	0.307418	1	3140	tags=23%, list=16%, signal=26%
GOBP_POSITIVE_REGULATION_OF_PEPTIDYL_LYSINE_ACETYLATION	35	0.384655	1.28028	0.138636	0.307383	1	2804	tags=29%, list=14%, signal=33%
GOBP_ACTIN_FILAMENT_POLYMERIZATION	146	0.302672	1.27995	0.0519802	0.307617	1	2998	tags=25%, list=15%, signal=30%
GOBP_REGULATION_OF_BONE_REMODELING	46	0.363978	1.27989	0.114754	0.30738	1	3346	tags=33%, list=17%, signal=39%
GOBP_REGULATION_OF_CELL_JUNCTION_ASSEMBLY	189	0.287599	1.2796	0.0366197	0.307502	1	3155	tags=25%, list=16%, signal=29%
GOBP_PEPTIDYL_LYSINE_DIMETHYLATION	21	0.437521	1.27895	0.149675	0.308291	1	1687	tags=38%, list=9%, signal=42%
GOBP_REGULATION_OF_CYTOSKELETON_ORGANIZATION	465	0.26095	1.27893	0.00934579	0.307931	1	3098	tags=24%, list=16%, signal=27%
GOBP_MESODERM_MORPHOGENESIS	70	0.337862	1.27862	0.108235	0.308056	1	4292	tags=39%, list=22%, signal=49%
GOBP_RNA_POLYADENYLATION	40	0.379743	1.27843	0.133484	0.307976	1	2378	tags=25%, list=12%, signal=28%
GOBP_POSITIVE_REGULATION_OF_MAPK_CASCADE	446	0.261318	1.27832	0.0102389	0.307781	1	3098	tags=21%, list=16%, signal=25%
GOBP_ENSHEATHMENT_OF_NEURONS	135	0.298197	1.27739	0.0444444	0.309049	1	2076	tags=21%, list=11%, signal=23%
GOBP_REGULATION_OF_LIPID_METABOLIC_PROCESS	294	0.271373	1.27721	0.0283912	0.308988	1	3693	tags=27%, list=19%, signal=33%
GOBP_REGULATION_OF_NOTCH_SIGNALING_PATHWAY	80	0.32828	1.27648	0.0789474	0.309934	1	3679	tags=30%, list=19%, signal=37%
GOBP_EPITHELIAL_CELL_MORPHOGENESIS	33	0.392313	1.27575	0.116379	0.310875	1	3118	tags=36%, list=16%, signal=43%
GOBP_NEURON_DEATH	319	0.266281	1.27548	0.0210843	0.310976	1	2273	tags=19%, list=12%, signal=21%
GOBP_SIGNAL_RELEASE	435	0.258584	1.27456	0.00645161	0.312278	1	3153	tags=21%, list=16%, signal=25%
GOBP_REGULATION_OF_SYNAPTIC_PLASTICITY	175	0.290243	1.27438	0.027248	0.312183	1	2964	tags=23%, list=15%, signal=27%
GOBP_NEGATIVE_REGULATION_OF_FAT_CELL_DIFFERENTIATION	50	0.360148	1.27426	0.133475	0.312015	1	3098	tags=30%, list=16%, signal=36%
GOBP_REGULATION_OF_MICROTUBULE_POLYMERIZATION	48	0.358635	1.27404	0.107623	0.312086	1	2613	tags=27%, list=13%, signal=31%
GOBP_BONE_MORPHOGENESIS	93	0.322236	1.27376	0.0738095	0.312158	1	4026	tags=32%, list=21%, signal=41%
GOBP_REGULATION_OF_EPIDERMIS_DEVELOPMENT	57	0.344984	1.27256	0.134091	0.313901	1	2361	tags=28%, list=12%, signal=32%
GOBP_RNA_SPLICING_VIA_TRANSESTERIFICATION_REACTIONS	257	0.278439	1.27231	0.0263158	0.313951	1	4261	tags=28%, list=22%, signal=35%
GOBP_REGULATION_OF_PRESYNAPSE_ORGANIZATION	33	0.395883	1.27188	0.135417	0.314387	1	3027	tags=30%, list=16%, signal=36%
GOBP_MUSCLE_CELL_APOPTOTIC_PROCESS	62	0.337529	1.27188	0.0981308	0.314011	1	4732	tags=39%, list=24%, signal=51%
GOBP_CELLULAR_CARBOHYDRATE_METABOLIC_PROCESS	259	0.277238	1.27167	0.0283912	0.313939	1	4559	tags=34%, list=23%, signal=43%
GOBP_CELL_FATE_COMMITMENT	255	0.276736	1.2714	0.0201729	0.314029	1	5927	tags=36%, list=31%, signal=51%
GOBP_REGULATION_OF_VASCULATURE_DEVELOPMENT	262	0.275834	1.27103	0.0252809	0.314323	1	2171	tags=19%, list=11%, signal=22%
GOBP_VACUOLAR_LOCALIZATION	80	0.323172	1.27077	0.0902439	0.314425	1	2689	tags=23%, list=14%, signal=26%
GOBP_AXONAL_TRANSPORT	62	0.337825	1.27072	0.107981	0.314131	1	2381	tags=23%, list=12%, signal=26%
GOBP_REGULATION_OF_CELL_PROJECTION_ASSEMBLY	200	0.284333	1.27056	0.0412979	0.314026	1	4266	tags=35%, list=22%, signal=44%
GOBP_CATECHOL_CONTAINING_COMPOUND_BIOSYNTHETIC_PROCESS	20	0.434784	1.27007	0.175439	0.314432	1	2877	tags=20%, list=15%, signal=23%
GOBP_TYPE_B_PANCREATIC_CELL_DEVELOPMENT	22	0.425728	1.26966	0.147505	0.314807	1	2709	tags=27%, list=14%, signal=32%
GOBP_REGULATION_OF_CELLULAR_AMINE_METABOLIC_PROCESS	29	0.401345	1.26891	0.135524	0.3157	1	1682	tags=21%, list=9%, signal=23%
GOBP_NEUROTRANSMITTER_TRANSPORT	202	0.282344	1.26849	0.0209974	0.316078	1	4256	tags=25%, list=22%, signal=31%
GOBP_FATTY_ACID_TRANSMEMBRANE_TRANSPORT	18	0.457105	1.26826	0.168	0.316122	1	2002	tags=39%, list=10%, signal=43%
GOBP_HISTONE_H3_K9_ACETYLATION	15	0.469537	1.26783	0.179704	0.316465	1	1687	tags=33%, list=9%, signal=36%
GOBP_MOLTING_CYCLE	108	0.307458	1.2678	0.0806045	0.316133	1	2346	tags=19%, list=12%, signal=21%
GOBP_RESPONSE_TO_COCAINE	46	0.359715	1.26761	0.12959	0.316083	1	910	tags=13%, list=5%, signal=14%
GOBP_ANTEROGRADE_AXONAL_TRANSPORT	47	0.366802	1.26753	0.136564	0.315859	1	2144	tags=23%, list=11%, signal=26%
GOBP_DENDRITE_MORPHOGENESIS	132	0.302129	1.26751	0.0485934	0.315516	1	3391	tags=27%, list=17%, signal=33%
GOBP_SYNAPTIC_TRANSMISSION_GABAERGIC	49	0.354428	1.26741	0.113734	0.315321	1	1534	tags=16%, list=8%, signal=18%
GOBP_PLASMA_MEMBRANE_TUBULATION	17	0.457743	1.26713	0.161926	0.315443	1	2783	tags=35%, list=14%, signal=41%
GOBP_POSITIVE_REGULATION_OF_INTRACELLULAR_TRANSPORT	184	0.287666	1.2668	0.0358127	0.315602	1	2414	tags=20%, list=12%, signal=23%
GOBP_INORGANIC_ANION_TRANSPORT	173	0.288199	1.26672	0.0496084	0.315366	1	3061	tags=23%, list=16%, signal=27%
GOBP_REGULATION_OF_ION_TRANSMEMBRANE_TRANSPORT	432	0.261287	1.26638	0.0031746	0.315654	1	3843	tags=24%, list=20%, signal=30%
GOBP_REGULATION_OF_STRIATED_MUSCLE_CELL_DIFFERENTIATION	78	0.327583	1.26628	0.110329	0.315466	1	2836	tags=22%, list=15%, signal=25%
GOBP_POSITIVE_REGULATION_OF_GLYCOLYTIC_PROCESS	17	0.454566	1.26568	0.143713	0.316107	1	2372	tags=29%, list=12%, signal=33%
GOBP_POSITIVE_REGULATION_OF_NUCLEOCYTOPLASMIC_TRANSPORT	56	0.34739	1.26551	0.0911162	0.316035	1	1903	tags=25%, list=10%, signal=28%
GOBP_CARDIAC_MUSCLE_CELL_ACTION_POTENTIAL	69	0.330502	1.2655	0.109557	0.315667	1	5280	tags=43%, list=27%, signal=60%
GOBP_B_CELL_HOMEOSTASIS	30	0.39734	1.26514	0.1606	0.315897	1	4916	tags=60%, list=25%, signal=80%
GOBP_NEGATIVE_REGULATION_OF_NERVOUS_SYSTEM_DEVELOPMENT	132	0.299156	1.26501	0.0645933	0.315763	1	3510	tags=25%, list=18%, signal=30%
GOBP_CELLULAR_RESPONSE_TO_ALKALOID	36	0.376811	1.26445	0.152273	0.316396	1	1969	tags=19%, list=10%, signal=22%
GOBP_TOR_SIGNALING	106	0.301173	1.26405	0.0707317	0.316699	1	4692	tags=38%, list=24%, signal=49%
GOBP_REGULATION_OF_CARDIAC_MUSCLE_CONTRACTION_BY_CALCIUM_ION_SIGNALING	24	0.425017	1.26401	0.136082	0.31639	1	3021	tags=33%, list=16%, signal=39%
GOBP_PATHWAY_RESTRICTED_SMAD_PROTEIN_PHOSPHORYLATION	60	0.340266	1.26389	0.111628	0.316234	1	4292	tags=33%, list=22%, signal=43%
GOBP_FOREBRAIN_NEURON_DEVELOPMENT	21	0.432327	1.26348	0.164147	0.316607	1	251	tags=10%, list=1%, signal=10%
GOBP_CYCLIC_NUCLEOTIDE_BIOSYNTHETIC_PROCESS	19	0.448251	1.26331	0.171429	0.316566	1	5498	tags=42%, list=28%, signal=59%
GOBP_HEART_FIELD_SPECIFICATION	18	0.458033	1.26326	0.173196	0.31629	1	1381	tags=17%, list=7%, signal=18%
GOBP_MUSCLE_CELL_FATE_COMMITMENT	19	0.450341	1.26307	0.179104	0.316307	1	5927	tags=37%, list=31%, signal=53%
GOBP_NEGATIVE_REGULATION_OF_PHOSPHORYLATION	334	0.265765	1.26288	0.0243161	0.31628	1	2778	tags=24%, list=14%, signal=28%
GOBP_HINDLIMB_MORPHOGENESIS	35	0.375054	1.26281	0.12987	0.316039	1	3027	tags=31%, list=16%, signal=37%
GOBP_NEUROTROPHIN_SIGNALING_PATHWAY	37	0.38218	1.26232	0.136842	0.316532	1	2504	tags=27%, list=13%, signal=31%
GOBP_PROTEIN_DNA_COMPLEX_SUBUNIT_ORGANIZATION	166	0.288036	1.26148	0.0554156	0.317662	1	3000	tags=27%, list=15%, signal=31%
GOBP_NEGATIVE_REGULATION_OF_NEURON_APOPTOTIC_PROCESS	130	0.295675	1.26039	0.0731707	0.319218	1	2273	tags=18%, list=12%, signal=21%
GOBP_FEMALE_GENITALIA_DEVELOPMENT	18	0.452632	1.25994	0.197505	0.319667	1	4859	tags=39%, list=25%, signal=52%
GOBP_ENDOTHELIAL_CELL_MIGRATION	197	0.282445	1.25977	0.0464481	0.319592	1	1724	tags=19%, list=9%, signal=21%
GOBP_PROTEOGLYCAN_METABOLIC_PROCESS	77	0.324882	1.25888	0.100962	0.320809	1	1129	tags=12%, list=6%, signal=12%
GOBP_POSITIVE_REGULATION_OF_MIRNA_TRANSCRIPTION	41	0.375633	1.25888	0.142857	0.320435	1	1692	tags=24%, list=9%, signal=27%
GOBP_NEGATIVE_REGULATION_OF_MRNA_METABOLIC_PROCESS	79	0.329401	1.25841	0.099537	0.320873	1	5100	tags=38%, list=26%, signal=51%
GOBP_CHONDROCYTE_PROLIFERATION	20	0.429277	1.25808	0.182008	0.321167	1	4026	tags=35%, list=21%, signal=44%
GOBP_POSITIVE_REGULATION_OF_ACTIN_CYTOSKELETON_REORGANIZATION	18	0.454201	1.25748	0.169072	0.321856	1	4865	tags=39%, list=25%, signal=52%
GOBP_DNA_METHYLATION	66	0.331723	1.25713	0.115473	0.322122	1	4442	tags=35%, list=23%, signal=45%
GOBP_NEGATIVE_REGULATION_OF_ENDOPLASMIC_RETICULUM_STRESS_INDUCED_INTRINSIC_APOPTOTIC_SIGNALING_PATHWAY	16	0.469926	1.2566	0.2	0.322688	1	396	tags=19%, list=2%, signal=19%
GOBP_SPHINGOLIPID_BIOSYNTHETIC_PROCESS	101	0.307522	1.25627	0.0787589	0.322902	1	2691	tags=23%, list=14%, signal=26%
GOBP_NEGATIVE_REGULATION_OF_UBIQUITIN_DEPENDENT_PROTEIN_CATABOLIC_PROCESS	45	0.354476	1.25602	0.127517	0.322972	1	2949	tags=27%, list=15%, signal=31%
GOBP_POSITIVE_REGULATION_OF_DOUBLE_STRAND_BREAK_REPAIR_VIA_HOMOLOGOUS_RECOMBINATION	31	0.38358	1.25596	0.157783	0.322726	1	2021	tags=26%, list=10%, signal=29%
GOBP_GOLGI_TO_VACUOLE_TRANSPORT	18	0.443744	1.2559	0.162741	0.322443	1	254	tags=17%, list=1%, signal=17%
GOBP_CARDIAC_ATRIUM_MORPHOGENESIS	26	0.403021	1.25535	0.183505	0.323092	1	2346	tags=19%, list=12%, signal=22%
GOBP_INTRACELLULAR_LIPID_TRANSPORT	41	0.368961	1.25493	0.155136	0.323516	1	2864	tags=32%, list=15%, signal=37%
GOBP_MUSCLE_CELL_DIFFERENTIATION	333	0.261319	1.25471	0.021021	0.323547	1	3155	tags=21%, list=16%, signal=25%
GOBP_GENITALIA_DEVELOPMENT	45	0.355765	1.25468	0.151659	0.323224	1	5816	tags=38%, list=30%, signal=54%
GOBP_FC_RECEPTOR_MEDIATED_STIMULATORY_SIGNALING_PATHWAY	32	0.388004	1.25463	0.139785	0.322959	1	1572	tags=28%, list=8%, signal=31%
GOBP_COLUMNAR_CUBOIDAL_EPITHELIAL_CELL_DIFFERENTIATION	88	0.317384	1.25377	0.0929705	0.324151	1	3183	tags=24%, list=16%, signal=28%
GOBP_VIRAL_TRANSCRIPTION	46	0.355258	1.25343	0.133484	0.324354	1	2196	tags=26%, list=11%, signal=29%
GOBP_CLATHRIN_COAT_ASSEMBLY	16	0.463139	1.25251	0.187891	0.325729	1	2463	tags=31%, list=13%, signal=36%
GOBP_REGULATION_OF_PROTEIN_SECRETION	233	0.271066	1.25194	0.0289474	0.326234	1	2524	tags=18%, list=13%, signal=20%
GOBP_AMINE_BIOSYNTHETIC_PROCESS	38	0.370478	1.2517	0.154684	0.326288	1	834	tags=13%, list=4%, signal=14%
GOBP_MRNA_SPLICE_SITE_SELECTION	29	0.401397	1.25164	0.169265	0.326012	1	5332	tags=45%, list=27%, signal=62%
GOBP_LAMELLIPODIUM_ASSEMBLY	65	0.326115	1.25158	0.114943	0.325771	1	1550	tags=17%, list=8%, signal=18%
GOBP_FACE_DEVELOPMENT	46	0.359766	1.25113	0.116883	0.326262	1	4859	tags=46%, list=25%, signal=61%
GOBP_MITOCHONDRIAL_FUSION	27	0.402287	1.251	0.156182	0.326132	1	4305	tags=33%, list=22%, signal=43%
GOBP_GOLGI_TO_PLASMA_MEMBRANE_PROTEIN_TRANSPORT	35	0.383851	1.25061	0.151261	0.326457	1	1562	tags=20%, list=8%, signal=22%
GOBP_NUCLEOSIDE_BISPHOSPHATE_METABOLIC_PROCESS	115	0.298923	1.24991	0.0707071	0.327349	1	3346	tags=29%, list=17%, signal=34%
GOBP_OLIGODENDROCYTE_DIFFERENTIATION	90	0.316475	1.24952	0.0927318	0.327707	1	1667	tags=16%, list=9%, signal=17%
GOBP_HISTONE_H4_ACETYLATION	66	0.331878	1.24798	0.125	0.330106	1	2021	tags=21%, list=10%, signal=24%
GOBP_REGULATION_OF_JNK_CASCADE	131	0.295137	1.24746	0.086514	0.330645	1	3027	tags=24%, list=16%, signal=28%
GOBP_HISTONE_H3_K9_MODIFICATION	50	0.355116	1.24696	0.136465	0.331187	1	3116	tags=36%, list=16%, signal=43%
GOBP_REGULATION_OF_ANION_TRANSMEMBRANE_TRANSPORT	24	0.40862	1.2466	0.163522	0.331488	1	1938	tags=29%, list=10%, signal=32%
GOBP_VESICLE_FUSION_TO_PLASMA_MEMBRANE	21	0.428416	1.24598	0.174194	0.332265	1	2689	tags=29%, list=14%, signal=33%
GOBP_MATURATION_OF_SSU_RRNA_FROM_TRICISTRONIC_RRNA_TRANSCRIPT_SSU_RRNA_5_8S_RRNA_LSU_RRNA	31	0.386494	1.24587	0.184855	0.332093	1	4073	tags=29%, list=21%, signal=37%
GOBP_CELLULAR_AMINO_ACID_CATABOLIC_PROCESS	102	0.305142	1.24496	0.097852	0.333393	1	4065	tags=35%, list=21%, signal=44%
GOBP_ALPHA_AMINO_ACID_CATABOLIC_PROCESS	83	0.316741	1.24484	0.114583	0.333224	1	4065	tags=37%, list=21%, signal=47%
GOBP_CIRCADIAN_RHYTHM	198	0.275307	1.24453	0.0544041	0.333352	1	2764	tags=22%, list=14%, signal=26%
GOBP_GLOMERULAR_EPITHELIUM_DEVELOPMENT	26	0.403677	1.24432	0.1875	0.333359	1	4259	tags=42%, list=22%, signal=54%
GOBP_STRIATED_MUSCLE_CELL_APOPTOTIC_PROCESS	38	0.372906	1.24414	0.151242	0.333313	1	5934	tags=50%, list=31%, signal=72%
GOBP_NEGATIVE_REGULATION_OF_PEPTIDE_SECRETION	38	0.364013	1.24373	0.143508	0.333702	1	2767	tags=21%, list=14%, signal=25%
GOBP_POSITIVE_REGULATION_OF_SYNCYTIUM_FORMATION_BY_PLASMA_MEMBRANE_FUSION	23	0.420296	1.24337	0.189011	0.33394	1	1587	tags=17%, list=8%, signal=19%
GOBP_TELENCEPHALON_DEVELOPMENT	231	0.27235	1.24317	0.0365169	0.333919	1	4430	tags=29%, list=23%, signal=37%
GOBP_PROTEIN_LIPID_COMPLEX_ASSEMBLY	26	0.401202	1.24314	0.166282	0.333585	1	2966	tags=27%, list=15%, signal=32%
GOBP_MEMBRANE_DEPOLARIZATION_DURING_CARDIAC_MUSCLE_CELL_ACTION_POTENTIAL	21	0.434325	1.24237	0.181034	0.334648	1	1154	tags=19%, list=6%, signal=20%
GOBP_POSITIVE_REGULATION_OF_CELLULAR_AMIDE_METABOLIC_PROCESS	141	0.292005	1.24223	0.0835509	0.334485	1	2676	tags=26%, list=14%, signal=29%
GOBP_AXON_ENSHEATHMENT_IN_CENTRAL_NERVOUS_SYSTEM	22	0.423663	1.24138	0.182927	0.33564	1	1321	tags=23%, list=7%, signal=24%
GOBP_SPLICEOSOMAL_COMPLEX_ASSEMBLY	52	0.346763	1.24121	0.143158	0.335562	1	5011	tags=38%, list=26%, signal=52%
GOBP_EMBRYONIC_CAMERA_TYPE_EYE_DEVELOPMENT	37	0.379153	1.24035	0.140351	0.33679	1	3312	tags=27%, list=17%, signal=33%
GOBP_ALPHA_AMINO_ACID_METABOLIC_PROCESS	180	0.280294	1.24018	0.0523691	0.336693	1	4065	tags=31%, list=21%, signal=39%
GOBP_NEGATIVE_REGULATION_OF_ERK1_AND_ERK2_CASCADE	64	0.330024	1.23991	0.123894	0.336831	1	3479	tags=38%, list=18%, signal=46%
GOBP_PURINE_NUCLEOTIDE_CATABOLIC_PROCESS	41	0.35634	1.23939	0.131944	0.337331	1	3284	tags=34%, list=17%, signal=41%
GOBP_EYE_MORPHOGENESIS	147	0.297569	1.23939	0.0920097	0.336958	1	2835	tags=19%, list=15%, signal=22%
GOBP_RENAL_SYSTEM_PROCESS_INVOLVED_IN_REGULATION_OF_BLOOD_VOLUME	15	0.45962	1.23923	0.208171	0.33687	1	2576	tags=27%, list=13%, signal=31%
GOBP_NEGATIVE_REGULATION_OF_KINASE_ACTIVITY	205	0.275132	1.23884	0.047486	0.337224	1	3753	tags=34%, list=19%, signal=41%
GOBP_BRANCHING_INVOLVED_IN_MAMMARY_GLAND_DUCT_MORPHOGENESIS	21	0.421898	1.23864	0.182403	0.337225	1	2537	tags=38%, list=13%, signal=44%
GOBP_POSITIVE_REGULATION_OF_PROTEIN_LOCALIZATION	409	0.255802	1.23851	0.013468	0.337091	1	2590	tags=20%, list=13%, signal=22%
GOBP_NEGATIVE_REGULATION_OF_DIGESTIVE_SYSTEM_PROCESS	17	0.442732	1.23849	0.180645	0.336763	1	484	tags=18%, list=2%, signal=18%
GOBP_CDC42_PROTEIN_SIGNAL_TRANSDUCTION	15	0.457307	1.23848	0.198795	0.336408	1	6172	tags=53%, list=32%, signal=78%
GOBP_MODIFIED_AMINO_ACID_TRANSPORT	32	0.378264	1.23764	0.172786	0.337575	1	3606	tags=34%, list=19%, signal=42%
GOBP_CHLORIDE_TRANSPORT	106	0.301834	1.23716	0.10101	0.33803	1	3861	tags=27%, list=20%, signal=34%
GOBP_RESPIRATORY_SYSTEM_DEVELOPMENT	191	0.276744	1.23645	0.0558511	0.338946	1	2346	tags=18%, list=12%, signal=20%
GOBP_POSITIVE_REGULATION_OF_HISTONE_METHYLATION	43	0.358533	1.23619	0.156989	0.33903	1	4475	tags=40%, list=23%, signal=51%
GOBP_VACUOLAR_TRANSPORT	136	0.294028	1.23594	0.0733496	0.339116	1	5736	tags=35%, list=30%, signal=50%
GOBP_RNA_CATABOLIC_PROCESS	240	0.272428	1.23526	0.0542169	0.339928	1	2111	tags=19%, list=11%, signal=21%
GOBP_CELL_COMMUNICATION_BY_ELECTRICAL_COUPLING	34	0.370413	1.23511	0.176072	0.339816	1	2107	tags=29%, list=11%, signal=33%
GOBP_POSITIVE_REGULATION_OF_PROTEIN_POLYMERIZATION	82	0.312383	1.23503	0.097619	0.339605	1	4840	tags=34%, list=25%, signal=45%
GOBP_CARDIAC_NEURAL_CREST_CELL_DIFFERENTIATION_INVOLVED_IN_HEART_DEVELOPMENT	16	0.453589	1.23498	0.187891	0.339343	1	3636	tags=50%, list=19%, signal=61%
GOBP_MESODERM_DEVELOPMENT	121	0.296856	1.23469	0.0812183	0.339479	1	4365	tags=32%, list=22%, signal=41%
GOBP_POSITIVE_REGULATION_OF_CELL_ADHESION	414	0.254773	1.23445	0.0265487	0.339557	1	2789	tags=21%, list=14%, signal=23%
GOBP_ACTIN_FILAMENT_DEPOLYMERIZATION	48	0.343596	1.23442	0.134956	0.339234	1	2768	tags=25%, list=14%, signal=29%
GOBP_NEGATIVE_REGULATION_OF_SYNAPTIC_TRANSMISSION	66	0.327692	1.23405	0.123043	0.339555	1	2504	tags=21%, list=13%, signal=24%
GOBP_DIOL_BIOSYNTHETIC_PROCESS	22	0.406353	1.23366	0.178808	0.33989	1	2582	tags=23%, list=13%, signal=26%
GOBP_ETHER_METABOLIC_PROCESS	24	0.408977	1.23348	0.180527	0.33988	1	1762	tags=21%, list=9%, signal=23%
GOBP_NAD_METABOLIC_PROCESS	28	0.396731	1.23328	0.196544	0.339866	1	3049	tags=32%, list=16%, signal=38%
GOBP_CELL_MIGRATION_INVOLVED_IN_SPROUTING_ANGIOGENESIS	53	0.3366	1.23283	0.141876	0.340285	1	1432	tags=23%, list=7%, signal=24%
GOBP_KERATINOCYTE_MIGRATION	18	0.439228	1.23175	0.21118	0.341968	1	1321	tags=22%, list=7%, signal=24%
GOBP_POSITIVE_REGULATION_OF_PROTEIN_LOCALIZATION_TO_CELL_SURFACE	17	0.441971	1.23094	0.220807	0.343147	1	2783	tags=41%, list=14%, signal=48%
GOBP_NEGATIVE_REGULATION_OF_CELL_JUNCTION_ASSEMBLY	27	0.397211	1.23069	0.163482	0.34326	1	1859	tags=26%, list=10%, signal=29%
GOBP_TRANSEPITHELIAL_TRANSPORT	32	0.380112	1.23064	0.171053	0.342963	1	1292	tags=16%, list=7%, signal=17%
GOBP_REGULATION_OF_ANDROGEN_RECEPTOR_SIGNALING_PATHWAY	26	0.401245	1.23029	0.17713	0.343226	1	2764	tags=27%, list=14%, signal=31%
GOBP_OVULATION_CYCLE_PROCESS	47	0.35641	1.22979	0.15493	0.343799	1	4815	tags=45%, list=25%, signal=59%
GOBP_POSITIVE_REGULATION_OF_EPITHELIAL_CELL_MIGRATION	136	0.288097	1.22974	0.0885417	0.343507	1	3210	tags=26%, list=17%, signal=31%
GOBP_POSITIVE_REGULATION_OF_EPITHELIAL_CELL_DIFFERENTIATION	51	0.34034	1.22948	0.156182	0.343649	1	2861	tags=25%, list=15%, signal=30%
GOBP_LIMBIC_SYSTEM_DEVELOPMENT	105	0.299327	1.22918	0.106061	0.343825	1	4409	tags=29%, list=23%, signal=37%
GOBP_REGULATION_OF_SMALL_MOLECULE_METABOLIC_PROCESS	296	0.260511	1.22907	0.0411392	0.343634	1	3236	tags=25%, list=17%, signal=30%
GOBP_CARDIOCYTE_DIFFERENTIATION	131	0.285759	1.22886	0.0906736	0.343669	1	4906	tags=38%, list=25%, signal=51%
GOBP_SPHINGOLIPID_METABOLIC_PROCESS	150	0.285456	1.22837	0.0704607	0.344126	1	2691	tags=21%, list=14%, signal=24%
GOBP_RHYTHMIC_PROCESS	288	0.262832	1.228	0.0272727	0.344478	1	2871	tags=23%, list=15%, signal=26%
GOBP_MYELOID_LEUKOCYTE_DIFFERENTIATION	200	0.27146	1.228	0.0551181	0.344116	1	2997	tags=24%, list=15%, signal=28%
GOBP_MALE_SEX_DIFFERENTIATION	155	0.279934	1.22798	0.0839695	0.34378	1	3097	tags=21%, list=16%, signal=24%
GOBP_REGULATION_OF_AUTOPHAGY	307	0.260231	1.22751	0.025	0.344257	1	3140	tags=23%, list=16%, signal=28%
GOBP_CAMP_METABOLIC_PROCESS	21	0.422313	1.22707	0.208678	0.344756	1	2380	tags=33%, list=12%, signal=38%
GOBP_REGULATION_OF_INTRACELLULAR_TRANSPORT	311	0.259927	1.22692	0.0247253	0.344706	1	1596	tags=16%, list=8%, signal=17%
GOBP_INTRACELLULAR_STEROL_TRANSPORT	27	0.388853	1.22662	0.186667	0.344944	1	2864	tags=37%, list=15%, signal=43%
GOBP_EXPORT_ACROSS_PLASMA_MEMBRANE	61	0.321888	1.22621	0.139326	0.345292	1	3799	tags=30%, list=20%, signal=37%
GOBP_LONG_TERM_SYNAPTIC_POTENTIATION	82	0.309684	1.22593	0.12037	0.345431	1	2964	tags=26%, list=15%, signal=30%
GOBP_FATTY_ACID_CATABOLIC_PROCESS	97	0.308672	1.22567	0.097852	0.345589	1	4792	tags=35%, list=25%, signal=46%
GOBP_LEUKOCYTE_DEGRANULATION	77	0.31795	1.22546	0.146919	0.345606	1	2100	tags=18%, list=11%, signal=20%
GOBP_EMBRYONIC_HEART_TUBE_DEVELOPMENT	82	0.308113	1.22544	0.124413	0.345274	1	2603	tags=21%, list=13%, signal=24%
GOBP_GLOMERULAR_EPITHELIAL_CELL_DIFFERENTIATION	23	0.412792	1.22475	0.197479	0.346092	1	4259	tags=48%, list=22%, signal=61%
GOBP_ERK1_AND_ERK2_CASCADE	296	0.258343	1.22417	0.027027	0.34678	1	3204	tags=24%, list=17%, signal=29%
GOBP_NEGATIVE_REGULATION_OF_STEROID_METABOLIC_PROCESS	23	0.396829	1.22394	0.189873	0.346847	1	1934	tags=17%, list=10%, signal=19%
GOBP_POSITIVE_REGULATION_OF_PROTEIN_EXPORT_FROM_NUCLEUS	16	0.451139	1.22243	0.216102	0.349323	1	1878	tags=31%, list=10%, signal=35%
GOBP_NEGATIVE_REGULATION_OF_ACTIN_FILAMENT_BUNDLE_ASSEMBLY	28	0.384265	1.22157	0.175476	0.350481	1	2049	tags=21%, list=11%, signal=24%
GOBP_MRNA_CIS_SPLICING_VIA_SPLICEOSOME	24	0.403349	1.22119	0.205567	0.350857	1	5011	tags=46%, list=26%, signal=62%
GOBP_NUCLEAR_MIGRATION	18	0.441334	1.22071	0.206751	0.35143	1	4547	tags=39%, list=23%, signal=51%
GOBP_CIRCADIAN_REGULATION_OF_GENE_EXPRESSION	67	0.320175	1.21992	0.146572	0.352548	1	2227	tags=27%, list=11%, signal=30%
GOBP_NUCLEOSIDE_BISPHOSPHATE_BIOSYNTHETIC_PROCESS	54	0.333919	1.21957	0.154525	0.352871	1	3346	tags=35%, list=17%, signal=42%
GOBP_LYMPHANGIOGENESIS	17	0.445156	1.21946	0.223629	0.352687	1	4309	tags=47%, list=22%, signal=60%
GOBP_OTIC_VESICLE_DEVELOPMENT	15	0.453586	1.21945	0.206628	0.352365	1	1758	tags=20%, list=9%, signal=22%
GOBP_REGULATION_OF_NEURON_PROJECTION_REGENERATION	28	0.386118	1.21879	0.194861	0.353192	1	3997	tags=36%, list=21%, signal=45%
GOBP_GLIAL_CELL_DEVELOPMENT	107	0.294333	1.2184	0.106635	0.353558	1	2002	tags=20%, list=10%, signal=22%
GOBP_HEART_TRABECULA_MORPHOGENESIS	29	0.378389	1.21753	0.190588	0.354775	1	5687	tags=55%, list=29%, signal=78%
GOBP_REGULATION_OF_ACTION_POTENTIAL	51	0.336381	1.21649	0.16309	0.356427	1	3055	tags=33%, list=16%, signal=39%
GOBP_HISTONE_MONOUBIQUITINATION	28	0.390941	1.21635	0.184322	0.356345	1	1397	tags=29%, list=7%, signal=31%
GOBP_OSSIFICATION	381	0.25407	1.21609	0.0460123	0.356441	1	3098	tags=20%, list=16%, signal=24%
GOBP_REGULATION_OF_PROTEIN_DEACETYLATION	56	0.331368	1.21606	0.170507	0.356114	1	2381	tags=27%, list=12%, signal=30%
GOBP_LONG_CHAIN_FATTY_ACID_BIOSYNTHETIC_PROCESS	27	0.391575	1.21585	0.20614	0.35614	1	3189	tags=26%, list=16%, signal=31%
GOBP_ORGANELLE_LOCALIZATION	497	0.247379	1.21544	0.0234899	0.356615	1	2689	tags=21%, list=14%, signal=23%
GOBP_CELL_GROWTH	434	0.246745	1.2151	0.0318021	0.35688	1	1855	tags=15%, list=10%, signal=17%
GOBP_RECEPTOR_CATABOLIC_PROCESS	26	0.395619	1.21443	0.214592	0.35778	1	354	tags=15%, list=2%, signal=16%
GOBP_HISTONE_H3_K9_METHYLATION	36	0.359139	1.21357	0.184946	0.359048	1	4507	tags=50%, list=23%, signal=65%
GOBP_REGULATION_OF_EPITHELIAL_CELL_APOPTOTIC_PROCESS	78	0.308555	1.21318	0.137931	0.359462	1	1667	tags=18%, list=9%, signal=20%
GOBP_REGULATION_OF_CHEMOTAXIS	206	0.268854	1.21227	0.0704607	0.360848	1	3204	tags=23%, list=17%, signal=27%
GOBP_MYELIN_ASSEMBLY	21	0.418395	1.21114	0.213823	0.362681	1	5280	tags=57%, list=27%, signal=78%
GOBP_POSITIVE_REGULATION_OF_MYOBLAST_FUSION	15	0.454814	1.21109	0.24165	0.36242	1	1587	tags=20%, list=8%, signal=22%
GOBP_INNERVATION	26	0.386286	1.21001	0.1875	0.364144	1	42	tags=12%, list=0%, signal=12%
GOBP_N_TERMINAL_PROTEIN_AMINO_ACID_MODIFICATION	26	0.395706	1.20957	0.213552	0.364627	1	1326	tags=19%, list=7%, signal=21%
GOBP_HOMEOSTASIS_OF_NUMBER_OF_CELLS	267	0.259284	1.20878	0.0703812	0.365816	1	3003	tags=24%, list=15%, signal=28%
GOBP_POSITIVE_REGULATION_OF_CARDIOCYTE_DIFFERENTIATION	15	0.446794	1.20862	0.222222	0.365788	1	5442	tags=53%, list=28%, signal=74%
GOBP_ENERGY_RESERVE_METABOLIC_PROCESS	74	0.310811	1.20815	0.150538	0.366296	1	3855	tags=32%, list=20%, signal=40%
GOBP_FATTY_ACID_DERIVATIVE_METABOLIC_PROCESS	66	0.324041	1.20762	0.177215	0.367062	1	3189	tags=33%, list=16%, signal=40%
GOBP_RECEPTOR_MEDIATED_ENDOCYTOSIS	231	0.266264	1.20746	0.0773639	0.367032	1	2998	tags=23%, list=15%, signal=26%
GOBP_REGULATION_OF_NMDA_RECEPTOR_ACTIVITY	21	0.408276	1.20703	0.210417	0.367522	1	1903	tags=29%, list=10%, signal=32%
GOBP_RNA_3_END_PROCESSING	90	0.301073	1.20562	0.138889	0.369906	1	3156	tags=21%, list=16%, signal=25%
GOBP_CAMERA_TYPE_EYE_PHOTORECEPTOR_CELL_DIFFERENTIATION	25	0.388691	1.20562	0.218818	0.369552	1	2521	tags=20%, list=13%, signal=23%
GOBP_EXTERNAL_ENCAPSULATING_STRUCTURE_ORGANIZATION	286	0.258239	1.20557	0.0575758	0.369242	1	3118	tags=20%, list=16%, signal=23%
GOBP_POSITIVE_REGULATION_OF_ACTIN_FILAMENT_POLYMERIZATION	48	0.337092	1.20496	0.17833	0.370033	1	5797	tags=44%, list=30%, signal=62%
GOBP_XENOBIOTIC_CATABOLIC_PROCESS	23	0.403168	1.20328	0.214602	0.372904	1	1574	tags=22%, list=8%, signal=24%
GOBP_NEGATIVE_REGULATION_OF_GTPASE_ACTIVITY	29	0.377298	1.20308	0.186047	0.372948	1	2072	tags=28%, list=11%, signal=31%
GOBP_BONE_RESORPTION	60	0.328873	1.20257	0.186104	0.373568	1	2997	tags=28%, list=15%, signal=33%
GOBP_VASCULAR_TRANSPORT	83	0.30545	1.20229	0.145238	0.373751	1	3091	tags=28%, list=16%, signal=33%
GOBP_RESPONSE_TO_CATECHOLAMINE	99	0.29766	1.20151	0.124688	0.374911	1	3263	tags=25%, list=17%, signal=30%
GOBP_NEGATIVE_REGULATION_OF_SECRETION	151	0.277373	1.20146	0.0916031	0.374637	1	2888	tags=20%, list=15%, signal=23%
GOBP_SMALL_MOLECULE_CATABOLIC_PROCESS	351	0.250728	1.20106	0.0630915	0.375031	1	4632	tags=31%, list=24%, signal=40%
GOBP_BASE_EXCISION_REPAIR	39	0.359343	1.20075	0.178082	0.375253	1	3041	tags=31%, list=16%, signal=36%
GOBP_POSITIVE_REGULATION_OF_DNA_RECOMBINATION	56	0.322631	1.20042	0.181176	0.375481	1	6549	tags=52%, list=34%, signal=78%
GOBP_SULFUR_COMPOUND_TRANSPORT	50	0.333945	1.19977	0.161148	0.376475	1	3091	tags=26%, list=16%, signal=31%
GOBP_TISSUE_REGENERATION	62	0.32519	1.19954	0.194175	0.376583	1	3027	tags=31%, list=16%, signal=36%
GOBP_REGULATION_OF_ACTIN_FILAMENT_BUNDLE_ASSEMBLY	95	0.296255	1.1995	0.141439	0.37629	1	2153	tags=20%, list=11%, signal=22%
GOBP_REGULATION_OF_CAMP_DEPENDENT_PROTEIN_KINASE_ACTIVITY	19	0.418179	1.19945	0.227642	0.376011	1	3543	tags=42%, list=18%, signal=51%
GOBP_CELLULAR_RESPONSE_TO_LOW_DENSITY_LIPOPROTEIN_PARTICLE_STIMULUS	17	0.433426	1.19943	0.250501	0.375691	1	2226	tags=35%, list=11%, signal=40%
GOBP_MICROTUBULE_BASED_TRANSPORT	174	0.269124	1.19925	0.121372	0.375627	1	2665	tags=21%, list=14%, signal=24%
GOBP_REGULATION_OF_SIGNAL_TRANSDUCTION_BY_P53_CLASS_MEDIATOR	87	0.302011	1.19909	0.135922	0.375545	1	2915	tags=26%, list=15%, signal=31%
GOBP_REGULATION_OF_LAMELLIPODIUM_ASSEMBLY	37	0.357975	1.19909	0.196388	0.375177	1	6046	tags=51%, list=31%, signal=74%
GOBP_NEUROMUSCULAR_PROCESS	141	0.279286	1.199	0.116883	0.374982	1	2367	tags=16%, list=12%, signal=18%
GOBP_NEGATIVE_REGULATION_OF_LIPID_METABOLIC_PROCESS	84	0.301925	1.19893	0.134293	0.374738	1	3091	tags=23%, list=16%, signal=27%
GOBP_SERINE_FAMILY_AMINO_ACID_METABOLIC_PROCESS	31	0.37556	1.19886	0.220302	0.374497	1	2976	tags=32%, list=15%, signal=38%
GOBP_PURINE_CONTAINING_COMPOUND_CATABOLIC_PROCESS	45	0.351341	1.19883	0.183295	0.374178	1	3284	tags=33%, list=17%, signal=40%
GOBP_HORMONE_MEDIATED_SIGNALING_PATHWAY	173	0.274779	1.19864	0.0997067	0.374205	1	2921	tags=20%, list=15%, signal=24%
GOBP_RESPONSE_TO_ALKALOID	94	0.301973	1.19854	0.138425	0.374064	1	2720	tags=20%, list=14%, signal=23%
GOBP_REGULATION_OF_STEROID_METABOLIC_PROCESS	90	0.297975	1.19843	0.139651	0.373955	1	3001	tags=23%, list=15%, signal=27%
GOBP_FOREBRAIN_NEURON_DIFFERENTIATION	40	0.355673	1.19836	0.183369	0.373705	1	923	tags=10%, list=5%, signal=10%
GOBP_REGULATION_OF_PHOSPHATASE_ACTIVITY	75	0.309799	1.19836	0.168203	0.373356	1	2107	tags=21%, list=11%, signal=24%
GOBP_PRESYNAPSE_ORGANIZATION	50	0.337713	1.19786	0.173333	0.373978	1	3027	tags=24%, list=16%, signal=28%
GOBP_POSITIVE_REGULATION_OF_CELL_SUBSTRATE_JUNCTION_ORGANIZATION	30	0.378863	1.19666	0.20296	0.375984	1	3982	tags=53%, list=21%, signal=67%
GOBP_REGULATION_OF_SYNAPTIC_TRANSMISSION_GABAERGIC	33	0.377807	1.19605	0.218818	0.376831	1	1534	tags=18%, list=8%, signal=20%
GOBP_DNA_DEALKYLATION	28	0.380503	1.19543	0.196035	0.377682	1	4189	tags=32%, list=22%, signal=41%
GOBP_EMBRYONIC_CRANIAL_SKELETON_MORPHOGENESIS	46	0.340074	1.19503	0.178824	0.378037	1	3999	tags=37%, list=21%, signal=46%
GOBP_INDOLE_CONTAINING_COMPOUND_METABOLIC_PROCESS	24	0.391578	1.19414	0.232609	0.379467	1	1467	tags=17%, list=8%, signal=18%
GOBP_MOTOR_NEURON_AXON_GUIDANCE	29	0.370385	1.19411	0.198704	0.379153	1	4275	tags=28%, list=22%, signal=35%
GOBP_CERAMIDE_METABOLIC_PROCESS	96	0.294963	1.19393	0.1477	0.379156	1	2676	tags=23%, list=14%, signal=26%
GOBP_ENTEROENDOCRINE_CELL_DIFFERENTIATION	29	0.372923	1.19377	0.191244	0.379118	1	2709	tags=24%, list=14%, signal=28%
GOBP_EPITHELIAL_CELL_CELL_ADHESION	16	0.433137	1.19321	0.241901	0.37984	1	1432	tags=31%, list=7%, signal=34%
GOBP_ENDOCRINE_PANCREAS_DEVELOPMENT	44	0.347668	1.19267	0.192308	0.380535	1	2709	tags=25%, list=14%, signal=29%
GOBP_ROOF_OF_MOUTH_DEVELOPMENT	88	0.299632	1.19222	0.157647	0.381157	1	4859	tags=35%, list=25%, signal=47%
GOBP_BICARBONATE_TRANSPORT	27	0.389298	1.19194	0.197065	0.381369	1	242	tags=11%, list=1%, signal=11%
GOBP_SEX_DETERMINATION	21	0.401137	1.19154	0.246253	0.381855	1	4760	tags=38%, list=25%, signal=50%
GOBP_POSITIVE_REGULATION_OF_CELL_SUBSTRATE_ADHESION	114	0.286568	1.19003	0.141772	0.384427	1	2777	tags=26%, list=14%, signal=31%
GOBP_REGULATION_OF_DENDRITE_EXTENSION	24	0.396704	1.18976	0.209251	0.384618	1	5724	tags=42%, list=29%, signal=59%
GOBP_POSITIVE_REGULATION_OF_MEMBRANE_POTENTIAL	15	0.4503	1.18975	0.2375	0.384257	1	2002	tags=20%, list=10%, signal=22%
GOBP_NEGATIVE_REGULATION_OF_AUTOPHAGY	74	0.312071	1.1897	0.13082	0.383974	1	2253	tags=20%, list=12%, signal=23%
GOBP_POSITIVE_REGULATION_OF_FAT_CELL_DIFFERENTIATION	60	0.317494	1.18938	0.173719	0.384273	1	3470	tags=35%, list=18%, signal=42%
GOBP_POSITIVE_REGULATION_OF_NEURON_DIFFERENTIATION	85	0.30468	1.18863	0.170616	0.385398	1	2405	tags=18%, list=12%, signal=20%
GOBP_PLATELET_AGGREGATION	68	0.316863	1.18784	0.158371	0.386575	1	3606	tags=31%, list=19%, signal=38%
GOBP_MRNA_3_END_PROCESSING	55	0.324776	1.1877	0.193333	0.386489	1	6305	tags=45%, list=32%, signal=67%
GOBP_POSITIVE_REGULATION_OF_INSULIN_SECRETION	66	0.31513	1.18763	0.168224	0.38626	1	2502	tags=24%, list=13%, signal=28%
GOBP_REGULATION_OF_ADENYLATE_CYCLASE_ACTIVITY	30	0.371398	1.18631	0.233261	0.388482	1	1658	tags=20%, list=9%, signal=22%
GOBP_RESPONSE_TO_POTASSIUM_ION	16	0.442775	1.18629	0.239175	0.38814	1	2576	tags=25%, list=13%, signal=29%
GOBP_PEROXISOME_ORGANIZATION	32	0.374955	1.18555	0.213636	0.389195	1	4565	tags=41%, list=24%, signal=53%
GOBP_HYALURONAN_METABOLIC_PROCESS	28	0.374549	1.18549	0.237006	0.388937	1	1559	tags=14%, list=8%, signal=16%
GOBP_RENAL_WATER_HOMEOSTASIS	20	0.404943	1.18386	0.219616	0.39192	1	2576	tags=25%, list=13%, signal=29%
GOBP_NEGATIVE_REGULATION_OF_PROTEIN_LOCALIZATION_TO_CELL_PERIPHERY	25	0.393569	1.18374	0.225877	0.391787	1	2594	tags=36%, list=13%, signal=42%
GOBP_HISTONE_H2A_MONOUBIQUITINATION	16	0.432806	1.18306	0.256461	0.392839	1	998	tags=31%, list=5%, signal=33%
GOBP_NEGATIVE_REGULATION_OF_ENDOTHELIAL_CELL_APOPTOTIC_PROCESS	31	0.365932	1.1827	0.219955	0.393163	1	1663	tags=23%, list=9%, signal=25%
GOBP_RETINA_DEVELOPMENT_IN_CAMERA_TYPE_EYE	143	0.277406	1.18227	0.0995146	0.39368	1	3742	tags=26%, list=19%, signal=32%
GOBP_REGULATION_OF_CELLULAR_AMIDE_METABOLIC_PROCESS	384	0.243101	1.18225	0.05	0.393344	1	4303	tags=29%, list=22%, signal=37%
GOBP_POSITIVE_REGULATION_OF_INTRACELLULAR_PROTEIN_TRANSPORT	145	0.275536	1.18169	0.134021	0.394094	1	2414	tags=20%, list=12%, signal=23%
GOBP_RIBONUCLEOPROTEIN_COMPLEX_SUBUNIT_ORGANIZATION	156	0.272999	1.1813	0.115789	0.394485	1	5461	tags=37%, list=28%, signal=50%
GOBP_LUNG_EPITHELIUM_DEVELOPMENT	35	0.356644	1.18124	0.207627	0.39425	1	680	tags=14%, list=4%, signal=15%
GOBP_NEGATIVE_REGULATION_OF_TRANSFORMING_GROWTH_FACTOR_BETA_RECEPTOR_SIGNALING_PATHWAY	71	0.30889	1.18112	0.184211	0.394105	1	2192	tags=27%, list=11%, signal=30%
GOBP_NEUROTRANSMITTER_RECEPTOR_INTERNALIZATION	18	0.428358	1.18058	0.254032	0.394862	1	409	tags=11%, list=2%, signal=11%
GOBP_POSITIVE_REGULATION_OF_NERVOUS_SYSTEM_PROCESS	33	0.363963	1.17964	0.234914	0.396489	1	1864	tags=21%, list=10%, signal=23%
GOBP_RESPONSE_TO_ALCOHOL	221	0.261571	1.1788	0.0805556	0.39781	1	4375	tags=33%, list=23%, signal=42%
GOBP_REGULATION_OF_PEPTIDE_TRANSPORT	175	0.2679	1.17837	0.0926966	0.398318	1	2524	tags=21%, list=13%, signal=23%
GOBP_EMBRYONIC_CAMERA_TYPE_EYE_MORPHOGENESIS	26	0.379638	1.1781	0.225877	0.398518	1	3277	tags=27%, list=17%, signal=32%
GOBP_ACTIN_MEDIATED_CELL_CONTRACTION	95	0.289425	1.17806	0.171765	0.398211	1	6047	tags=48%, list=31%, signal=70%
GOBP_POSITIVE_REGULATION_OF_SYNAPTIC_TRANSMISSION	143	0.276126	1.17776	0.108939	0.398416	1	2964	tags=21%, list=15%, signal=25%
GOBP_AMYLOID_PRECURSOR_PROTEIN_CATABOLIC_PROCESS	51	0.333371	1.17751	0.208134	0.398562	1	3210	tags=31%, list=17%, signal=37%
GOBP_RNA_PHOSPHODIESTER_BOND_HYDROLYSIS_ENDONUCLEOLYTIC	68	0.312435	1.1774	0.176991	0.398419	1	2680	tags=21%, list=14%, signal=24%
GOBP_NEGATIVE_REGULATION_OF_ATP_METABOLIC_PROCESS	26	0.384679	1.17631	0.221719	0.400288	1	4062	tags=42%, list=21%, signal=53%
GOBP_ORGANELLE_FUSION	130	0.279254	1.17618	0.136126	0.400146	1	2689	tags=22%, list=14%, signal=25%
GOBP_DETECTION_OF_TEMPERATURE_STIMULUS_INVOLVED_IN_SENSORY_PERCEPTION_OF_PAIN	16	0.433329	1.17578	0.261702	0.400566	1	4812	tags=44%, list=25%, signal=58%
GOBP_SYNAPTIC_VESICLE_CYTOSKELETAL_TRANSPORT	18	0.411889	1.17572	0.247485	0.400302	1	414	tags=17%, list=2%, signal=17%
GOBP_NEGATIVE_REGULATION_OF_PROTEIN_SECRETION	57	0.324672	1.17561	0.221198	0.400148	1	2153	tags=18%, list=11%, signal=20%
GOBP_REGULATION_OF_MAST_CELL_ACTIVATION_INVOLVED_IN_IMMUNE_RESPONSE	34	0.353405	1.17546	0.212254	0.400009	1	3093	tags=26%, list=16%, signal=31%
GOBP_CELLULAR_MONOVALENT_INORGANIC_CATION_HOMEOSTASIS	97	0.288962	1.17545	0.164021	0.399663	1	4991	tags=31%, list=26%, signal=41%
GOBP_REGULATION_OF_SMAD_PROTEIN_SIGNAL_TRANSDUCTION	30	0.367015	1.17437	0.224176	0.401514	1	2051	tags=23%, list=11%, signal=26%
GOBP_SKIN_EPIDERMIS_DEVELOPMENT	90	0.297898	1.17375	0.15122	0.402403	1	2346	tags=18%, list=12%, signal=20%
GOBP_FC_EPSILON_RECEPTOR_SIGNALING_PATHWAY	21	0.409153	1.17368	0.226981	0.402173	1	2088	tags=33%, list=11%, signal=37%
GOBP_TRNA_MODIFICATION	82	0.297291	1.1733	0.182243	0.402548	1	7952	tags=60%, list=41%, signal=101%
GOBP_REGULATION_OF_PEPTIDYL_THREONINE_PHOSPHORYLATION	41	0.339915	1.17314	0.230108	0.402493	1	4915	tags=39%, list=25%, signal=52%
GOBP_POSITIVE_REGULATION_OF_HISTONE_MODIFICATION	95	0.291466	1.1724	0.155039	0.40365	1	2888	tags=26%, list=15%, signal=31%
GOBP_VASCULOGENESIS	77	0.307219	1.17227	0.176471	0.403556	1	3728	tags=38%, list=19%, signal=46%
GOBP_3_PHOSPHOADENOSINE_5_PHOSPHOSULFATE_METABOLIC_PROCESS	18	0.422387	1.17199	0.286325	0.403753	1	1302	tags=22%, list=7%, signal=24%
GOBP_INORGANIC_ION_IMPORT_ACROSS_PLASMA_MEMBRANE	101	0.283936	1.17176	0.153846	0.40385	1	3076	tags=20%, list=16%, signal=23%
GOBP_PHARYNGEAL_SYSTEM_DEVELOPMENT	28	0.369491	1.17148	0.223404	0.404077	1	4292	tags=39%, list=22%, signal=50%
GOBP_REGULATION_OF_TELOMERE_MAINTENANCE	68	0.310113	1.17147	0.176471	0.403718	1	5282	tags=41%, list=27%, signal=56%
GOBP_BODY_MORPHOGENESIS	42	0.337878	1.17129	0.222222	0.403701	1	4593	tags=43%, list=24%, signal=56%
GOBP_POSITIVE_REGULATION_OF_VASCULATURE_DEVELOPMENT	151	0.268311	1.1712	0.137755	0.403504	1	3121	tags=25%, list=16%, signal=30%
GOBP_PROTEIN_TARGETING_TO_LYSOSOME	19	0.403207	1.17106	0.270661	0.403428	1	5736	tags=47%, list=30%, signal=67%
GOBP_CELL_ADHESION_MEDIATED_BY_INTEGRIN	80	0.300766	1.17101	0.172986	0.403159	1	1371	tags=15%, list=7%, signal=16%
GOBP_CARDIAC_SEPTUM_MORPHOGENESIS	65	0.310773	1.1709	0.181053	0.403039	1	2346	tags=18%, list=12%, signal=21%
GOBP_POSITIVE_REGULATION_OF_MUSCLE_CELL_APOPTOTIC_PROCESS	22	0.390617	1.1709	0.247241	0.402668	1	4732	tags=41%, list=24%, signal=54%
GOBP_STEM_CELL_PROLIFERATION	63	0.313358	1.17081	0.200501	0.402469	1	3098	tags=27%, list=16%, signal=32%
GOBP_NEGATIVE_REGULATION_OF_CARDIAC_MUSCLE_TISSUE_GROWTH	20	0.415086	1.17079	0.240781	0.402131	1	5184	tags=50%, list=27%, signal=68%
GOBP_REGULATION_OF_INFLAMMATORY_RESPONSE_TO_ANTIGENIC_STIMULUS	38	0.350455	1.17078	0.202532	0.401783	1	3270	tags=26%, list=17%, signal=32%
GOBP_NEURAL_RETINA_DEVELOPMENT	69	0.307129	1.1706	0.18543	0.401766	1	3084	tags=25%, list=16%, signal=29%
GOBP_GAMMA_DELTA_T_CELL_ACTIVATION	19	0.407729	1.17056	0.255507	0.401489	1	2157	tags=21%, list=11%, signal=24%
GOBP_REGULATION_OF_HORMONE_SECRETION	227	0.25673	1.17055	0.11054	0.401133	1	2767	tags=21%, list=14%, signal=24%
GOBP_RESPONSE_TO_CHOLESTEROL	24	0.392345	1.17054	0.234136	0.400782	1	4281	tags=46%, list=22%, signal=59%
GOBP_AMINOGLYCAN_BIOSYNTHETIC_PROCESS	78	0.301888	1.16983	0.17866	0.401779	1	1559	tags=13%, list=8%, signal=14%
GOBP_METANEPHROS_DEVELOPMENT	88	0.29617	1.16957	0.204276	0.402029	1	3883	tags=30%, list=20%, signal=37%
GOBP_POTASSIUM_ION_TRANSPORT	226	0.256393	1.16954	0.109859	0.401707	1	3377	tags=18%, list=17%, signal=21%
GOBP_RESPONSE_TO_FIBROBLAST_GROWTH_FACTOR	107	0.287776	1.16878	0.14532	0.402954	1	2308	tags=18%, list=12%, signal=20%
GOBP_FOLIC_ACID_CONTAINING_COMPOUND_METABOLIC_PROCESS	26	0.382601	1.16839	0.261339	0.40337	1	5060	tags=42%, list=26%, signal=57%
GOBP_POSITIVE_REGULATION_OF_NEURON_PROJECTION_DEVELOPMENT	134	0.280921	1.16821	0.148352	0.403372	1	2520	tags=19%, list=13%, signal=21%
GOBP_REGULATION_OF_CELLULAR_RESPONSE_TO_HEAT	16	0.426963	1.16772	0.254386	0.404033	1	3104	tags=44%, list=16%, signal=52%
GOBP_AMYLOID_BETA_FORMATION	42	0.337702	1.16615	0.206972	0.40689	1	3210	tags=31%, list=17%, signal=37%
GOBP_NUCLEOTIDE_EXCISION_REPAIR	55	0.320536	1.16612	0.206977	0.40657	1	4517	tags=38%, list=23%, signal=50%
GOBP_CELLULAR_AMINO_ACID_METABOLIC_PROCESS	239	0.256324	1.16606	0.112717	0.406329	1	4619	tags=31%, list=24%, signal=41%
GOBP_POSITIVE_REGULATION_OF_RELEASE_OF_SEQUESTERED_CALCIUM_ION_INTO_CYTOSOL	39	0.342658	1.16605	0.21709	0.405967	1	669	tags=13%, list=3%, signal=13%
GOBP_PHOSPHATIDYLCHOLINE_BIOSYNTHETIC_PROCESS	28	0.371848	1.16579	0.254386	0.406157	1	3091	tags=29%, list=16%, signal=34%
GOBP_PERICARDIUM_DEVELOPMENT	19	0.414541	1.16563	0.273684	0.406133	1	4145	tags=47%, list=21%, signal=60%
GOBP_HEAD_MORPHOGENESIS	33	0.364145	1.16563	0.235294	0.405776	1	4593	tags=45%, list=24%, signal=59%
GOBP_RESPONSE_TO_DOPAMINE	83	0.296603	1.16557	0.188995	0.405529	1	3464	tags=25%, list=18%, signal=31%
GOBP_ENDOSOME_TO_LYSOSOME_TRANSPORT	56	0.313364	1.16453	0.196429	0.407256	1	620	tags=9%, list=3%, signal=9%
GOBP_CELL_CELL_ADHESION_MEDIATED_BY_INTEGRIN	16	0.427187	1.16421	0.277433	0.407551	1	4434	tags=44%, list=23%, signal=57%
GOBP_REGULATION_OF_TELOMERE_CAPPING	24	0.383319	1.16415	0.256696	0.407293	1	3158	tags=42%, list=16%, signal=50%
GOBP_POSITIVE_REGULATION_OF_NEURON_MIGRATION	15	0.434574	1.16316	0.26971	0.409022	1	2750	tags=33%, list=14%, signal=39%
GOBP_CENTRAL_NERVOUS_SYSTEM_PROJECTION_NEURON_AXONOGENESIS	23	0.390294	1.16312	0.260304	0.408749	1	5695	tags=52%, list=29%, signal=74%
GOBP_AMIDE_TRANSPORT	276	0.248468	1.16231	0.0922619	0.410107	1	2931	tags=21%, list=15%, signal=25%
GOBP_CEREBELLAR_PURKINJE_CELL_LAYER_DEVELOPMENT	24	0.383986	1.16226	0.229787	0.409826	1	730	tags=21%, list=4%, signal=22%
GOBP_REGULATION_OF_MITOCHONDRION_ORGANIZATION	130	0.27347	1.1622	0.133858	0.409592	1	3810	tags=33%, list=20%, signal=41%
GOBP_NEPHRIC_DUCT_DEVELOPMENT	15	0.435697	1.16168	0.281314	0.410309	1	99	tags=13%, list=1%, signal=13%
GOBP_NEGATIVE_REGULATION_OF_MITOCHONDRION_ORGANIZATION	44	0.332316	1.16164	0.242762	0.410012	1	4056	tags=41%, list=21%, signal=52%
GOBP_REGULATION_OF_RECEPTOR_MEDIATED_ENDOCYTOSIS	101	0.283322	1.16151	0.175879	0.409944	1	2998	tags=21%, list=15%, signal=24%
GOBP_NUCLEOSIDE_PHOSPHATE_CATABOLIC_PROCESS	76	0.297843	1.16141	0.194631	0.409789	1	3325	tags=30%, list=17%, signal=36%
GOBP_POSITIVE_REGULATION_OF_JUN_KINASE_ACTIVITY	40	0.344813	1.16134	0.227074	0.409599	1	4013	tags=38%, list=21%, signal=47%
GOBP_BLASTODERM_SEGMENTATION	24	0.387284	1.16109	0.251572	0.409785	1	2753	tags=25%, list=14%, signal=29%
GOBP_DETECTION_OF_TEMPERATURE_STIMULUS_INVOLVED_IN_SENSORY_PERCEPTION	19	0.416294	1.1609	0.240618	0.409787	1	3195	tags=32%, list=16%, signal=38%
GOBP_WALKING_BEHAVIOR	31	0.35761	1.15955	0.24359	0.412265	1	5770	tags=35%, list=30%, signal=50%
GOBP_POSITIVE_REGULATION_OF_CELL_JUNCTION_ASSEMBLY	102	0.285915	1.15936	0.185366	0.412266	1	2374	tags=22%, list=12%, signal=24%
GOBP_PEPTIDE_CATABOLIC_PROCESS	28	0.367821	1.15886	0.257669	0.412961	1	5359	tags=43%, list=28%, signal=59%
GOBP_ORGANIC_ACID_TRANSPORT	305	0.247687	1.15848	0.0953846	0.413352	1	2899	tags=20%, list=15%, signal=24%
GOBP_PROTEIN_LOCALIZATION_TO_SYNAPSE	64	0.308438	1.1584	0.234339	0.413163	1	3121	tags=25%, list=16%, signal=30%
GOBP_NEGATIVE_REGULATION_OF_SODIUM_ION_TRANSPORT	17	0.421829	1.15826	0.271523	0.413104	1	1067	tags=35%, list=5%, signal=37%
GOBP_POSITIVE_REGULATION_OF_SUPRAMOLECULAR_FIBER_ORGANIZATION	162	0.267095	1.15816	0.138021	0.41292	1	2613	tags=21%, list=13%, signal=24%
GOBP_NEGATIVE_REGULATION_OF_DNA_TEMPLATED_TRANSCRIPTION_ELONGATION	15	0.423257	1.15801	0.278481	0.41287	1	2630	tags=33%, list=14%, signal=39%
GOBP_NEGATIVE_REGULATION_OF_PROTEIN_LOCALIZATION	178	0.261057	1.15759	0.142857	0.413395	1	3525	tags=26%, list=18%, signal=31%
GOBP_NEUROMUSCULAR_JUNCTION_DEVELOPMENT	41	0.341562	1.15719	0.249428	0.41387	1	1052	tags=12%, list=5%, signal=13%
GOBP_ATRIAL_CARDIAC_MUSCLE_CELL_TO_AV_NODE_CELL_SIGNALING	17	0.42072	1.15617	0.262582	0.415618	1	6701	tags=65%, list=35%, signal=99%
GOBP_NEGATIVE_REGULATION_OF_CELL_MATRIX_ADHESION	33	0.358344	1.15601	0.261062	0.415566	1	2361	tags=27%, list=12%, signal=31%
GOBP_PEPTIDYL_TYROSINE_DEPHOSPHORYLATION	95	0.287169	1.15559	0.190476	0.416074	1	2924	tags=26%, list=15%, signal=31%
GOBP_FOREBRAIN_GENERATION_OF_NEURONS	49	0.321234	1.15419	0.240826	0.418641	1	1775	tags=12%, list=9%, signal=13%
GOBP_POSITIVE_REGULATION_OF_EMBRYONIC_DEVELOPMENT	18	0.410123	1.15406	0.291139	0.418572	1	6001	tags=56%, list=31%, signal=80%
GOBP_CEREBRAL_CORTEX_RADIALLY_ORIENTED_CELL_MIGRATION	29	0.365137	1.1538	0.259179	0.418723	1	928	tags=14%, list=5%, signal=14%
GOBP_REGULATION_OF_PH	83	0.290646	1.15339	0.186047	0.419126	1	4991	tags=33%, list=26%, signal=44%
GOBP_CARTILAGE_DEVELOPMENT	176	0.261264	1.15278	0.135279	0.420049	1	3027	tags=22%, list=16%, signal=25%
GOBP_NUCLEAR_BODY_ORGANIZATION	16	0.421775	1.15263	0.25	0.419983	1	5421	tags=50%, list=28%, signal=69%
GOBP_RENAL_FILTRATION	22	0.388989	1.15191	0.274678	0.421112	1	232	tags=9%, list=1%, signal=9%
GOBP_GLOMERULUS_DEVELOPMENT	66	0.302963	1.15179	0.197674	0.420998	1	4259	tags=32%, list=22%, signal=41%
GOBP_ENDOCHONDRAL_BONE_MORPHOGENESIS	54	0.318191	1.15156	0.213303	0.421117	1	1975	tags=22%, list=10%, signal=25%
GOBP_BLASTOCYST_FORMATION	40	0.338502	1.15153	0.25167	0.420811	1	4434	tags=38%, list=23%, signal=49%
GOBP_BLOOD_VESSEL_ENDOTHELIAL_CELL_MIGRATION	108	0.278515	1.1515	0.174419	0.420493	1	1472	tags=19%, list=8%, signal=20%
GOBP_ESTABLISHMENT_OF_PROTEIN_LOCALIZATION_TO_PLASMA_MEMBRANE	51	0.318476	1.15114	0.231504	0.420844	1	1589	tags=16%, list=8%, signal=17%
GOBP_GAMMA_AMINOBUTYRIC_ACID_TRANSPORT	16	0.424892	1.15083	0.262055	0.42112	1	2558	tags=25%, list=13%, signal=29%
GOBP_REGULATION_OF_RELEASE_OF_SEQUESTERED_CALCIUM_ION_INTO_CYTOSOL	73	0.302343	1.15067	0.199525	0.421068	1	2163	tags=19%, list=11%, signal=22%
GOBP_POSITIVE_REGULATION_OF_CALCIUM_ION_DEPENDENT_EXOCYTOSIS	17	0.416467	1.15038	0.266393	0.421348	1	4957	tags=41%, list=26%, signal=55%
GOBP_ACTIN_MYOSIN_FILAMENT_SLIDING	16	0.410317	1.1496	0.262821	0.422609	1	5980	tags=56%, list=31%, signal=81%
GOBP_WOUND_HEALING	399	0.237571	1.14941	0.0869565	0.42264	1	1995	tags=16%, list=10%, signal=18%
GOBP_POSITIVE_REGULATION_OF_ESTABLISHMENT_OF_PROTEIN_LOCALIZATION	286	0.247832	1.14876	0.109756	0.423622	1	2418	tags=17%, list=12%, signal=19%
GOBP_POSTTRANSCRIPTIONAL_REGULATION_OF_GENE_EXPRESSION	439	0.234447	1.1485	0.0628931	0.423823	1	4303	tags=28%, list=22%, signal=36%
GOBP_ESTABLISHMENT_OF_ENDOTHELIAL_BARRIER	51	0.319826	1.14832	0.240654	0.423801	1	1859	tags=20%, list=10%, signal=22%
GOBP_POSITIVE_REGULATION_OF_TRANSLATION	118	0.274855	1.14769	0.16545	0.424749	1	2267	tags=23%, list=12%, signal=26%
GOBP_NEURAL_TUBE_PATTERNING	35	0.357204	1.14732	0.237762	0.425179	1	3312	tags=29%, list=17%, signal=34%
GOBP_ACID_SECRETION	43	0.331552	1.14725	0.237581	0.424961	1	2463	tags=21%, list=13%, signal=24%
GOBP_POSITIVE_REGULATION_OF_TRANSCRIPTION_BY_RNA_POLYMERASE_I	21	0.396819	1.14711	0.278017	0.424862	1	1004	tags=19%, list=5%, signal=20%
GOBP_NEGATIVE_REGULATION_OF_RESPONSE_TO_DNA_DAMAGE_STIMULUS	64	0.302456	1.14699	0.223947	0.424775	1	2940	tags=31%, list=15%, signal=37%
GOBP_REGULATION_OF_SMOOTH_MUSCLE_CELL_DIFFERENTIATION	28	0.355589	1.1468	0.249485	0.424779	1	3147	tags=32%, list=16%, signal=38%
GOBP_CELLULAR_MODIFIED_AMINO_ACID_METABOLIC_PROCESS	175	0.258626	1.14669	0.146667	0.424639	1	3698	tags=28%, list=19%, signal=34%
GOBP_AMINE_METABOLIC_PROCESS	108	0.274051	1.14498	0.169336	0.427952	1	3501	tags=25%, list=18%, signal=30%
GOBP_POSITIVE_REGULATION_OF_HISTONE_ACETYLATION	30	0.353921	1.1446	0.255034	0.428375	1	2804	tags=27%, list=14%, signal=31%
GOBP_HISTONE_H3_K14_ACETYLATION	21	0.388461	1.14454	0.264831	0.428112	1	6829	tags=67%, list=35%, signal=103%
GOBP_POSITIVE_REGULATION_OF_STEM_CELL_PROLIFERATION	23	0.381412	1.14448	0.27533	0.427896	1	3098	tags=30%, list=16%, signal=36%
GOBP_POSITIVE_REGULATION_OF_PLASMA_MEMBRANE_BOUNDED_CELL_PROJECTION_ASSEMBLY	96	0.281258	1.14402	0.204134	0.428578	1	2904	tags=26%, list=15%, signal=30%
GOBP_CONNECTIVE_TISSUE_DEVELOPMENT	239	0.246833	1.14392	0.132353	0.428414	1	2947	tags=22%, list=15%, signal=26%
GOBP_CARDIAC_MUSCLE_TISSUE_DEVELOPMENT	207	0.251942	1.14392	0.132979	0.428064	1	3641	tags=22%, list=19%, signal=27%
GOBP_REGULATION_OF_STEROID_BIOSYNTHETIC_PROCESS	64	0.311675	1.14387	0.239631	0.427805	1	3001	tags=25%, list=15%, signal=29%
GOBP_STEM_CELL_DIVISION	23	0.386405	1.14379	0.273333	0.427577	1	5479	tags=61%, list=28%, signal=85%
GOBP_PROTEIN_AUTOPHOSPHORYLATION	209	0.25636	1.14335	0.129943	0.428077	1	2456	tags=22%, list=13%, signal=24%
GOBP_REGULATION_OF_AMYLOID_PRECURSOR_PROTEIN_CATABOLIC_PROCESS	39	0.340457	1.14313	0.234043	0.428183	1	3210	tags=31%, list=17%, signal=37%
GOBP_POSITIVE_REGULATION_OF_NEURON_APOPTOTIC_PROCESS	46	0.325386	1.14254	0.239468	0.429063	1	4305	tags=39%, list=22%, signal=50%
GOBP_REGULATION_OF_ACTIVIN_RECEPTOR_SIGNALING_PATHWAY	24	0.377755	1.14245	0.282158	0.428854	1	6231	tags=50%, list=32%, signal=74%
GOBP_REGULATION_OF_HEART_RATE_BY_CARDIAC_CONDUCTION	37	0.340958	1.14225	0.261702	0.428922	1	2329	tags=27%, list=12%, signal=31%
GOBP_HORMONE_TRANSPORT	281	0.243652	1.14113	0.144118	0.430847	1	2931	tags=21%, list=15%, signal=24%
GOBP_ARTERY_MORPHOGENESIS	67	0.3027	1.14071	0.233173	0.43138	1	2899	tags=24%, list=15%, signal=28%
GOBP_RRNA_TRANSCRIPTION	27	0.366048	1.14043	0.271552	0.431639	1	1598	tags=15%, list=8%, signal=16%
GOBP_AUDITORY_RECEPTOR_CELL_MORPHOGENESIS	15	0.433725	1.14036	0.288235	0.431419	1	3590	tags=40%, list=18%, signal=49%
GOBP_POSITIVE_REGULATION_OF_PROTEIN_BINDING	77	0.295611	1.14016	0.231156	0.431493	1	1286	tags=14%, list=7%, signal=15%
GOBP_DICARBOXYLIC_ACID_METABOLIC_PROCESS	88	0.289314	1.13983	0.178922	0.431864	1	5127	tags=42%, list=26%, signal=57%
GOBP_POSITIVE_REGULATION_OF_ERK1_AND_ERK2_CASCADE	196	0.257618	1.13965	0.15	0.431903	1	3204	tags=21%, list=17%, signal=25%
GOBP_PROSTATE_GLAND_MORPHOGENESIS	28	0.365852	1.13965	0.28172	0.431541	1	2346	tags=18%, list=12%, signal=20%
GOBP_CELLULAR_COMPONENT_MAINTENANCE	57	0.306851	1.13892	0.219277	0.432711	1	3259	tags=25%, list=17%, signal=29%
GOBP_ACTIVIN_RECEPTOR_SIGNALING_PATHWAY	41	0.330485	1.13885	0.256018	0.432507	1	6231	tags=51%, list=32%, signal=75%
GOBP_LUNG_ALVEOLUS_DEVELOPMENT	43	0.326619	1.13857	0.253968	0.432737	1	4822	tags=37%, list=25%, signal=49%
GOBP_GANGLION_DEVELOPMENT	16	0.422885	1.13827	0.286364	0.433002	1	911	tags=19%, list=5%, signal=20%
GOBP_PYRIDINE_CONTAINING_COMPOUND_BIOSYNTHETIC_PROCESS	30	0.357339	1.13736	0.275488	0.434613	1	1467	tags=23%, list=8%, signal=25%
GOBP_CARDIAC_MUSCLE_CONTRACTION	122	0.266185	1.13642	0.196262	0.436264	1	3055	tags=21%, list=16%, signal=25%
GOBP_POSITIVE_REGULATION_OF_OXIDOREDUCTASE_ACTIVITY	54	0.313689	1.13613	0.25523	0.436519	1	2676	tags=24%, list=14%, signal=28%
GOBP_DENDRITE_DEVELOPMENT	219	0.248181	1.1356	0.142045	0.437307	1	3391	tags=24%, list=17%, signal=28%
GOBP_CARBOHYDRATE_DERIVATIVE_CATABOLIC_PROCESS	155	0.262097	1.13557	0.179293	0.436991	1	2076	tags=16%, list=11%, signal=18%
GOBP_REGULATION_OF_LEUKOCYTE_DIFFERENTIATION	269	0.244876	1.13521	0.141643	0.437367	1	3003	tags=20%, list=15%, signal=23%
GOBP_CELL_CELL_JUNCTION_MAINTENANCE	15	0.416398	1.13519	0.315011	0.437071	1	3259	tags=33%, list=17%, signal=40%
GOBP_GLYCOSPHINGOLIPID_METABOLIC_PROCESS	57	0.306025	1.13491	0.229117	0.437324	1	4458	tags=37%, list=23%, signal=48%
GOBP_RUFFLE_ORGANIZATION	52	0.311569	1.13438	0.239726	0.438129	1	1288	tags=17%, list=7%, signal=18%
GOBP_ETHANOL_METABOLIC_PROCESS	19	0.399951	1.13356	0.287281	0.43952	1	1203	tags=16%, list=6%, signal=17%
GOBP_REGULATION_OF_CARTILAGE_DEVELOPMENT	59	0.304857	1.13328	0.237778	0.439688	1	2082	tags=17%, list=11%, signal=19%
GOBP_REGULATION_OF_MACROAUTOPHAGY	146	0.26612	1.13297	0.184896	0.439975	1	3140	tags=25%, list=16%, signal=29%
GOBP_REGULATION_OF_GLIAL_CELL_PROLIFERATION	26	0.369777	1.13277	0.265823	0.440005	1	4081	tags=46%, list=21%, signal=58%
GOBP_PEPTIDE_TRANSPORT	237	0.248264	1.13241	0.132768	0.440419	1	2524	tags=19%, list=13%, signal=22%
GOBP_REGULATION_OF_SUBSTRATE_ADHESION_DEPENDENT_CELL_SPREADING	52	0.318398	1.13226	0.246411	0.440356	1	1981	tags=21%, list=10%, signal=23%
GOBP_POSITIVE_REGULATION_OF_CYTOSKELETON_ORGANIZATION	180	0.255497	1.13218	0.163889	0.440198	1	2613	tags=19%, list=13%, signal=22%
GOBP_MEGAKARYOCYTE_DIFFERENTIATION	41	0.333288	1.13154	0.262712	0.441169	1	2477	tags=20%, list=13%, signal=22%
GOBP_CELL_DEATH_IN_RESPONSE_TO_OXIDATIVE_STRESS	84	0.285182	1.13075	0.218824	0.442493	1	2002	tags=23%, list=10%, signal=25%
GOBP_EXTRACELLULAR_VESICLE_BIOGENESIS	23	0.385044	1.13071	0.274633	0.442218	1	1115	tags=22%, list=6%, signal=23%
GOBP_MICROVILLUS_ASSEMBLY	21	0.37414	1.13051	0.294643	0.442295	1	2504	tags=29%, list=13%, signal=33%
GOBP_VENTRICULAR_CARDIAC_MUSCLE_TISSUE_DEVELOPMENT	54	0.318619	1.13009	0.248792	0.442784	1	6282	tags=50%, list=32%, signal=74%
GOBP_CARDIAC_MUSCLE_CELL_MEMBRANE_REPOLARIZATION	35	0.344893	1.12973	0.260369	0.443223	1	5280	tags=37%, list=27%, signal=51%
GOBP_IMPORT_INTO_CELL	215	0.248361	1.12921	0.162534	0.444022	1	3091	tags=20%, list=16%, signal=24%
GOBP_NEGATIVE_REGULATION_OF_SMALL_MOLECULE_METABOLIC_PROCESS	82	0.283671	1.12841	0.220551	0.445448	1	3049	tags=24%, list=16%, signal=29%
GOBP_PROTEIN_KINASE_C_ACTIVATING_G_PROTEIN_COUPLED_RECEPTOR_SIGNALING_PATHWAY	25	0.368219	1.12764	0.31828	0.446768	1	1972	tags=20%, list=10%, signal=22%
GOBP_LYMPH_VESSEL_DEVELOPMENT	28	0.353271	1.12741	0.282258	0.446924	1	1228	tags=21%, list=6%, signal=23%
GOBP_AROMATIC_AMINO_ACID_FAMILY_METABOLIC_PROCESS	30	0.353875	1.12732	0.291667	0.446743	1	6146	tags=47%, list=32%, signal=68%
GOBP_MONOCARBOXYLIC_ACID_CATABOLIC_PROCESS	119	0.272677	1.12721	0.225728	0.446619	1	4473	tags=31%, list=23%, signal=40%
GOBP_REGULATION_OF_ESTABLISHMENT_OF_PROTEIN_LOCALIZATION	475	0.230308	1.1269	0.0626866	0.446925	1	2635	tags=18%, list=14%, signal=20%
GOBP_REGULATION_OF_VASCULAR_PERMEABILITY	47	0.323554	1.12687	0.278912	0.446627	1	1572	tags=21%, list=8%, signal=23%
GOBP_REGULATION_OF_METAL_ION_TRANSPORT	354	0.234881	1.12646	0.116923	0.447156	1	3658	tags=23%, list=19%, signal=28%
GOBP_CERAMIDE_TRANSPORT	17	0.40954	1.12609	0.30572	0.447591	1	3472	tags=35%, list=18%, signal=43%
GOBP_HEART_FORMATION	31	0.347823	1.12575	0.287526	0.447988	1	1381	tags=16%, list=7%, signal=17%
GOBP_REGULATION_OF_MESENCHYMAL_CELL_PROLIFERATION	29	0.361315	1.12484	0.295218	0.449574	1	1632	tags=17%, list=8%, signal=19%
GOBP_REGULATION_OF_ANION_TRANSPORT	86	0.287075	1.12479	0.22695	0.449314	1	2418	tags=22%, list=12%, signal=25%
GOBP_GLUCOSE_CATABOLIC_PROCESS	19	0.391077	1.12466	0.315353	0.449234	1	3049	tags=32%, list=16%, signal=37%
GOBP_NEGATIVE_REGULATION_OF_FIBROBLAST_PROLIFERATION	27	0.356994	1.12452	0.289583	0.449163	1	2153	tags=19%, list=11%, signal=21%
GOBP_EXECUTION_PHASE_OF_APOPTOSIS	77	0.287409	1.12414	0.218182	0.449583	1	4305	tags=36%, list=22%, signal=47%
GOBP_POSITIVE_REGULATION_OF_SMALL_MOLECULE_METABOLIC_PROCESS	130	0.264971	1.12408	0.211443	0.449336	1	2778	tags=22%, list=14%, signal=26%
GOBP_STRIATED_MUSCLE_CELL_DIFFERENTIATION	250	0.243146	1.12395	0.161585	0.449258	1	3783	tags=23%, list=19%, signal=28%
GOBP_REGULATION_OF_NERVOUS_SYSTEM_PROCESS	127	0.266473	1.12391	0.229167	0.448974	1	3362	tags=25%, list=17%, signal=30%
GOBP_DIOL_METABOLIC_PROCESS	27	0.357243	1.12373	0.295405	0.448986	1	2582	tags=19%, list=13%, signal=21%
GOBP_MEMBRANE_FUSION	145	0.259219	1.12351	0.213568	0.449075	1	2689	tags=19%, list=14%, signal=22%
GOBP_REGULATION_OF_PROTEIN_LOCALIZATION_TO_NUCLEUS	122	0.26552	1.12333	0.212435	0.449117	1	1538	tags=17%, list=8%, signal=19%
GOBP_PROXIMAL_DISTAL_PATTERN_FORMATION	32	0.345684	1.12312	0.252723	0.449177	1	891	tags=13%, list=5%, signal=13%
GOBP_LONG_CHAIN_FATTY_ACYL_COA_METABOLIC_PROCESS	22	0.377062	1.12311	0.284444	0.448841	1	3189	tags=32%, list=16%, signal=38%
GOBP_LENS_MORPHOGENESIS_IN_CAMERA_TYPE_EYE	20	0.388314	1.12276	0.308017	0.449218	1	893	tags=20%, list=5%, signal=21%
GOBP_REGULATION_OF_TRANSCRIPTION_BY_RNA_POLYMERASE_III	28	0.357235	1.12276	0.300885	0.44887	1	6227	tags=54%, list=32%, signal=79%
GOBP_MONOVALENT_INORGANIC_CATION_HOMEOSTASIS	142	0.26311	1.12244	0.221393	0.449207	1	4127	tags=25%, list=21%, signal=32%
GOBP_NEGATIVE_REGULATION_OF_EPITHELIAL_CELL_MIGRATION	65	0.298663	1.12221	0.245575	0.449341	1	1321	tags=14%, list=7%, signal=15%
GOBP_BRAIN_MORPHOGENESIS	34	0.339564	1.12189	0.284836	0.44965	1	4203	tags=38%, list=22%, signal=49%
GOBP_THYROID_HORMONE_GENERATION	21	0.378455	1.12175	0.298097	0.449562	1	2913	tags=29%, list=15%, signal=34%
GOBP_ORGANIC_ACID_BIOSYNTHETIC_PROCESS	286	0.240212	1.12173	0.171171	0.449248	1	3189	tags=22%, list=16%, signal=26%
GOBP_POSITIVE_REGULATION_OF_PROTEIN_CONTAINING_COMPLEX_ASSEMBLY	176	0.254672	1.12049	0.177596	0.451571	1	4840	tags=34%, list=25%, signal=44%
GOBP_REGULATION_OF_MEMBRANE_POTENTIAL	392	0.231741	1.11946	0.118343	0.453526	1	5928	tags=39%, list=31%, signal=55%
GOBP_ENDOTHELIAL_CELL_DEVELOPMENT	67	0.29807	1.11886	0.253968	0.454506	1	1859	tags=18%, list=10%, signal=20%
GOBP_MITOPHAGY	27	0.35686	1.11837	0.297694	0.455235	1	3049	tags=33%, list=16%, signal=39%
GOBP_AMYLOID_BETA_METABOLIC_PROCESS	52	0.31105	1.11811	0.266667	0.455413	1	3215	tags=29%, list=17%, signal=34%
GOBP_LENS_FIBER_CELL_DIFFERENTIATION	34	0.340773	1.11789	0.295455	0.455551	1	3479	tags=29%, list=18%, signal=36%
GOBP_REGULATION_OF_PROTEIN_GLYCOSYLATION	15	0.423782	1.11781	0.320261	0.455355	1	3377	tags=40%, list=17%, signal=48%
GOBP_POSITIVE_REGULATION_OF_SECRETION	290	0.236441	1.11727	0.165192	0.456189	1	2502	tags=16%, list=13%, signal=18%
GOBP_PERIPHERAL_NERVOUS_SYSTEM_DEVELOPMENT	76	0.290616	1.11721	0.271635	0.455957	1	2779	tags=25%, list=14%, signal=29%
GOBP_REGULATION_OF_POLYSACCHARIDE_METABOLIC_PROCESS	38	0.331401	1.11716	0.294931	0.455683	1	3589	tags=32%, list=18%, signal=39%
GOBP_VASCULAR_PROCESS_IN_CIRCULATORY_SYSTEM	251	0.243563	1.11715	0.164223	0.455344	1	1572	tags=14%, list=8%, signal=15%
GOBP_POSITIVE_REGULATION_OF_ANIMAL_ORGAN_MORPHOGENESIS	34	0.337638	1.11664	0.288462	0.456133	1	707	tags=9%, list=4%, signal=9%
GOBP_POSITIVE_REGULATION_OF_LAMELLIPODIUM_ASSEMBLY	26	0.361395	1.11653	0.297414	0.456019	1	6046	tags=46%, list=31%, signal=67%
GOBP_MEMBRANE_REPOLARIZATION_DURING_CARDIAC_MUSCLE_CELL_ACTION_POTENTIAL	20	0.39365	1.11574	0.301653	0.457377	1	5020	tags=45%, list=26%, signal=61%
GOBP_REGULATION_OF_MEGAKARYOCYTE_DIFFERENTIATION	22	0.382104	1.11524	0.322034	0.458131	1	90	tags=9%, list=0%, signal=9%
GOBP_RESPONSE_TO_ETHANOL	115	0.267755	1.11509	0.236776	0.458118	1	1069	tags=11%, list=6%, signal=12%
GOBP_RESPONSE_TO_AMPHETAMINE	30	0.347155	1.11508	0.295154	0.45778	1	2044	tags=17%, list=11%, signal=19%
GOBP_SKELETAL_MUSCLE_CELL_DIFFERENTIATION	64	0.298296	1.11367	0.269504	0.460491	1	3879	tags=30%, list=20%, signal=37%
GOBP_PROTEIN_DEPOLYMERIZATION	99	0.276475	1.11361	0.24173	0.460266	1	2768	tags=22%, list=14%, signal=26%
GOBP_NEGATIVE_REGULATION_OF_CELL_DEVELOPMENT	163	0.255845	1.11343	0.216216	0.460303	1	3510	tags=25%, list=18%, signal=30%
GOBP_LEUKOTRIENE_BIOSYNTHETIC_PROCESS	18	0.397278	1.1126	0.332632	0.461793	1	3862	tags=39%, list=20%, signal=49%
GOBP_KIDNEY_EPITHELIUM_DEVELOPMENT	138	0.259288	1.11181	0.234146	0.463118	1	4259	tags=29%, list=22%, signal=37%
GOBP_NEUROTROPHIN_TRK_RECEPTOR_SIGNALING_PATHWAY	24	0.367597	1.11144	0.301455	0.463577	1	2273	tags=29%, list=12%, signal=33%
GOBP_REGULATION_OF_CHONDROCYTE_DIFFERENTIATION	42	0.325738	1.11081	0.275785	0.464603	1	2082	tags=17%, list=11%, signal=19%
GOBP_WATER_TRANSPORT	23	0.369866	1.11044	0.309368	0.465051	1	55	tags=9%, list=0%, signal=9%
GOBP_CELLULAR_COMPONENT_ASSEMBLY_INVOLVED_IN_MORPHOGENESIS	104	0.270559	1.11012	0.235154	0.465376	1	6171	tags=46%, list=32%, signal=67%
GOBP_APOPTOTIC_PROCESS_INVOLVED_IN_MORPHOGENESIS	24	0.374681	1.10993	0.342052	0.46547	1	5662	tags=46%, list=29%, signal=65%
GOBP_REGULATION_OF_HEMOPOIESIS	334	0.233371	1.10978	0.135762	0.465409	1	3003	tags=20%, list=15%, signal=23%
GOBP_DEVELOPMENT_OF_PRIMARY_SEXUAL_CHARACTERISTICS	218	0.245704	1.10955	0.2	0.465566	1	3097	tags=22%, list=16%, signal=26%
GOBP_MEMBRANE_LIPID_BIOSYNTHETIC_PROCESS	134	0.264765	1.10922	0.255102	0.465944	1	2691	tags=19%, list=14%, signal=22%
GOBP_NEGATIVE_REGULATION_OF_CELLULAR_PROTEIN_CATABOLIC_PROCESS	68	0.292534	1.10897	0.273756	0.466129	1	1062	tags=16%, list=5%, signal=17%
GOBP_WATER_HOMEOSTASIS	62	0.292481	1.10858	0.260976	0.466662	1	2110	tags=15%, list=11%, signal=16%
GOBP_PEPTIDYL_ARGININE_METHYLATION	16	0.417992	1.10831	0.343949	0.466932	1	5245	tags=31%, list=27%, signal=43%
GOBP_REGULATION_OF_CELL_ADHESION_MEDIATED_BY_INTEGRIN	46	0.314929	1.10774	0.293737	0.467828	1	1371	tags=20%, list=7%, signal=21%
GOBP_PURINE_NUCLEOTIDE_TRANSPORT	29	0.347438	1.10769	0.284501	0.467566	1	2674	tags=28%, list=14%, signal=32%
GOBP_REGULATION_OF_BICELLULAR_TIGHT_JUNCTION_ASSEMBLY	20	0.388589	1.10759	0.316092	0.467431	1	1878	tags=30%, list=10%, signal=33%
GOBP_REGULATION_OF_CELLULAR_PH	73	0.285191	1.10751	0.249412	0.467263	1	4991	tags=30%, list=26%, signal=40%
GOBP_PROTEIN_POLYMERIZATION	238	0.243591	1.1074	0.19685	0.467174	1	2998	tags=22%, list=15%, signal=26%
GOBP_B_CELL_DIFFERENTIATION	131	0.260293	1.10723	0.224274	0.467185	1	2274	tags=18%, list=12%, signal=21%
GOBP_RESPONSE_TO_PAIN	29	0.356398	1.10711	0.286976	0.467102	1	4127	tags=34%, list=21%, signal=44%
GOBP_ANATOMICAL_STRUCTURE_HOMEOSTASIS	298	0.236088	1.10683	0.166667	0.467392	1	2846	tags=19%, list=15%, signal=22%
GOBP_ERYTHROCYTE_MATURATION	15	0.413798	1.1066	0.347222	0.467559	1	1237	tags=20%, list=6%, signal=21%
GOBP_CELL_DIFFERENTIATION_INVOLVED_IN_KIDNEY_DEVELOPMENT	57	0.303462	1.10584	0.285714	0.468877	1	4259	tags=37%, list=22%, signal=47%
GOBP_AUDITORY_RECEPTOR_CELL_DEVELOPMENT	19	0.384759	1.10546	0.32	0.46933	1	5327	tags=53%, list=27%, signal=72%
GOBP_NEGATIVE_REGULATION_OF_CYTOSKELETON_ORGANIZATION	134	0.261152	1.10542	0.230159	0.469076	1	2239	tags=20%, list=12%, signal=23%
GOBP_TETRAHYDROFOLATE_METABOLIC_PROCESS	17	0.39558	1.10505	0.337634	0.469555	1	4940	tags=41%, list=25%, signal=55%
GOBP_MEMBRANE_LIPID_METABOLIC_PROCESS	191	0.248448	1.10486	0.20436	0.469587	1	2691	tags=19%, list=14%, signal=22%
GOBP_AUTOPHAGY_OF_MITOCHONDRION	78	0.28616	1.10462	0.286052	0.46982	1	3049	tags=27%, list=16%, signal=32%
GOBP_POSITIVE_REGULATION_OF_MITOTIC_CELL_CYCLE	113	0.273426	1.10439	0.246341	0.469951	1	2002	tags=19%, list=10%, signal=21%
GOBP_MAINTENANCE_OF_GASTROINTESTINAL_EPITHELIUM	20	0.374924	1.10416	0.315678	0.470103	1	1830	tags=25%, list=9%, signal=28%
GOBP_OUTFLOW_TRACT_MORPHOGENESIS	76	0.286857	1.10386	0.262295	0.470411	1	3641	tags=26%, list=19%, signal=32%
GOBP_SEX_DIFFERENTIATION	265	0.236606	1.10386	0.196581	0.47005	1	3097	tags=21%, list=16%, signal=24%
GOBP_GLIAL_CELL_MIGRATION	44	0.319215	1.10322	0.289474	0.471116	1	3918	tags=30%, list=20%, signal=37%
GOBP_MISMATCH_REPAIR	28	0.351721	1.10283	0.309091	0.471633	1	1446	tags=18%, list=7%, signal=19%
GOBP_REGULATION_OF_LIPID_STORAGE	49	0.306279	1.10217	0.290249	0.472672	1	2226	tags=16%, list=11%, signal=18%
GOBP_POSITIVE_REGULATION_OF_CANONICAL_WNT_SIGNALING_PATHWAY	101	0.268969	1.10113	0.274157	0.474626	1	2940	tags=22%, list=15%, signal=26%
GOBP_PEPTIDE_CROSS_LINKING	34	0.336936	1.10072	0.326613	0.475146	1	251	tags=9%, list=1%, signal=9%
GOBP_AMINO_SUGAR_METABOLIC_PROCESS	39	0.328513	1.10049	0.313978	0.475297	1	1602	tags=18%, list=8%, signal=20%
GOBP_SULFUR_COMPOUND_BIOSYNTHETIC_PROCESS	135	0.259648	1.10015	0.255051	0.475668	1	3346	tags=24%, list=17%, signal=28%
GOBP_REGULATION_OF_MULTICELLULAR_ORGANISM_GROWTH	62	0.293534	1.09986	0.277778	0.47597	1	3547	tags=27%, list=18%, signal=33%
GOBP_NEGATIVE_REGULATION_OF_SUPRAMOLECULAR_FIBER_ORGANIZATION	135	0.260291	1.0998	0.25964	0.475753	1	2239	tags=19%, list=12%, signal=21%
GOBP_EMBRYONIC_HINDLIMB_MORPHOGENESIS	28	0.351903	1.09921	0.315193	0.476712	1	3027	tags=29%, list=16%, signal=34%
GOBP_VENTRICULAR_CARDIAC_MUSCLE_TISSUE_MORPHOGENESIS	45	0.315806	1.09905	0.305882	0.476718	1	6282	tags=51%, list=32%, signal=75%
GOBP_REGULATION_OF_NEUROTRANSMITTER_LEVELS	205	0.241587	1.09881	0.200557	0.476915	1	4256	tags=23%, list=22%, signal=30%
GOBP_REGULATION_OF_NUCLEAR_TRANSCRIBED_MRNA_CATABOLIC_PROCESS_DEADENYLATION_DEPENDENT_DECAY	20	0.374138	1.09878	0.334029	0.476604	1	1805	tags=25%, list=9%, signal=28%
GOBP_NEGATIVE_REGULATION_OF_EXOCYTOSIS	32	0.337266	1.09867	0.308008	0.476486	1	1136	tags=19%, list=6%, signal=20%
GOBP_FEMALE_SEX_DIFFERENTIATION	121	0.257869	1.09849	0.234973	0.47656	1	4859	tags=35%, list=25%, signal=46%
GOBP_INTERLEUKIN_6_MEDIATED_SIGNALING_PATHWAY	18	0.4018	1.0979	0.33557	0.477488	1	1460	tags=33%, list=8%, signal=36%
GOBP_POSITIVE_REGULATION_OF_KINASE_ACTIVITY	442	0.223603	1.09764	0.160142	0.477681	1	3098	tags=21%, list=16%, signal=24%
GOBP_REGULATION_OF_GLYCOPROTEIN_METABOLIC_PROCESS	49	0.303866	1.097	0.295011	0.478773	1	3377	tags=29%, list=17%, signal=35%
GOBP_EMBRYONIC_EYE_MORPHOGENESIS	35	0.333326	1.09671	0.326754	0.479079	1	3277	tags=23%, list=17%, signal=27%
GOBP_REGULATION_OF_ENDOCRINE_PROCESS	35	0.330081	1.09661	0.326226	0.478925	1	6805	tags=46%, list=35%, signal=70%
GOBP_DNA_MODIFICATION	107	0.270087	1.09657	0.241814	0.478643	1	4442	tags=31%, list=23%, signal=40%
GOBP_CEREBELLAR_CORTEX_FORMATION	23	0.369015	1.09648	0.320595	0.478458	1	5047	tags=39%, list=26%, signal=53%
GOBP_ANION_TRANSPORT	488	0.223113	1.09585	0.140065	0.479537	1	3125	tags=20%, list=16%, signal=23%
GOBP_PLATELET_ACTIVATION	124	0.260249	1.09523	0.259162	0.480474	1	1907	tags=16%, list=10%, signal=18%
GOBP_SECRETION_BY_TISSUE	40	0.322998	1.09463	0.340909	0.481475	1	748	tags=13%, list=4%, signal=13%
GOBP_POSITIVE_REGULATION_OF_TRANSLATIONAL_INITIATION	26	0.361293	1.09398	0.319106	0.482547	1	4237	tags=42%, list=22%, signal=54%
GOBP_NEGATIVE_REGULATION_OF_REACTIVE_OXYGEN_SPECIES_METABOLIC_PROCESS	37	0.324028	1.09376	0.305046	0.482666	1	1820	tags=16%, list=9%, signal=18%
GOBP_BIOLOGICAL_PROCESS_INVOLVED_IN_INTRASPECIES_INTERACTION_BETWEEN_ORGANISMS	52	0.298502	1.09326	0.291111	0.483423	1	5236	tags=35%, list=27%, signal=47%
GOBP_NEGATIVE_REGULATION_OF_OSSIFICATION	32	0.335368	1.09308	0.317073	0.48346	1	2346	tags=25%, list=12%, signal=28%
GOBP_ANGIOGENESIS_INVOLVED_IN_WOUND_HEALING	25	0.361713	1.09183	0.341936	0.485934	1	1432	tags=28%, list=7%, signal=30%
GOBP_CELLULAR_IRON_ION_HOMEOSTASIS	58	0.293562	1.09152	0.289412	0.486241	1	377	tags=9%, list=2%, signal=9%
GOBP_MAMMARY_GLAND_MORPHOGENESIS	41	0.320384	1.09148	0.297778	0.485975	1	2861	tags=32%, list=15%, signal=37%
GOBP_SODIUM_ION_EXPORT_ACROSS_PLASMA_MEMBRANE	15	0.404418	1.0912	0.320084	0.486256	1	4618	tags=40%, list=24%, signal=52%
GOBP_COGNITION	288	0.234143	1.09083	0.196629	0.486707	1	2986	tags=19%, list=15%, signal=23%
GOBP_REGULATION_OF_ENDOPLASMIC_RETICULUM_STRESS_INDUCED_INTRINSIC_APOPTOTIC_SIGNALING_PATHWAY	28	0.344326	1.09064	0.32684	0.486746	1	789	tags=18%, list=4%, signal=19%
GOBP_REGULATION_OF_POTASSIUM_ION_TRANSMEMBRANE_TRANSPORTER_ACTIVITY	56	0.301653	1.09046	0.286036	0.486795	1	1703	tags=14%, list=9%, signal=16%
GOBP_BILE_ACID_AND_BILE_SALT_TRANSPORT	29	0.345339	1.09038	0.317568	0.486624	1	953	tags=17%, list=5%, signal=18%
GOBP_POSITIVE_REGULATION_OF_EPITHELIAL_CELL_PROLIFERATION	180	0.247455	1.09036	0.204482	0.486316	1	3027	tags=21%, list=16%, signal=25%
GOBP_POSITIVE_REGULATION_OF_TRANSCRIPTION_ELONGATION_FROM_RNA_POLYMERASE_II_PROMOTER	18	0.389179	1.08837	0.345833	0.490563	1	2456	tags=39%, list=13%, signal=44%
GOBP_SARCOMERE_ORGANIZATION	41	0.314735	1.08811	0.315565	0.490751	1	6171	tags=49%, list=32%, signal=71%
GOBP_NEGATIVE_REGULATION_OF_PROTEIN_CONTAINING_COMPLEX_DISASSEMBLY	65	0.287919	1.08792	0.311512	0.490782	1	1971	tags=20%, list=10%, signal=22%
GOBP_CLEAVAGE_INVOLVED_IN_RRNA_PROCESSING	25	0.358645	1.08792	0.342553	0.490419	1	4109	tags=28%, list=21%, signal=35%
GOBP_OVULATION	23	0.357945	1.08744	0.345528	0.491136	1	4815	tags=48%, list=25%, signal=64%
GOBP_NEGATIVE_REGULATION_OF_TELOMERE_MAINTENANCE	28	0.348115	1.08678	0.337054	0.492292	1	5205	tags=43%, list=27%, signal=58%
GOBP_EPITHELIAL_TO_MESENCHYMAL_TRANSITION_INVOLVED_IN_ENDOCARDIAL_CUSHION_FORMATION	19	0.382196	1.086	0.352113	0.493682	1	2346	tags=21%, list=12%, signal=24%
GOBP_NEGATIVE_REGULATION_OF_HORMONE_SECRETION	58	0.297017	1.08597	0.293556	0.49337	1	2189	tags=19%, list=11%, signal=21%
GOBP_REGULATION_OF_PROTEIN_SUMOYLATION	21	0.372444	1.08585	0.366738	0.493269	1	6523	tags=52%, list=34%, signal=79%
GOBP_DORSAL_VENTRAL_NEURAL_TUBE_PATTERNING	22	0.366602	1.08564	0.36478	0.493364	1	2861	tags=27%, list=15%, signal=32%
GOBP_POSITIVE_REGULATION_OF_CYTOSOLIC_CALCIUM_ION_CONCENTRATION_INVOLVED_IN_PHOSPHOLIPASE_C_ACTIVATING_G_PROTEIN_COUPLED_SIGNALING_PATHWAY	31	0.332647	1.08536	0.325221	0.493612	1	2687	tags=19%, list=14%, signal=22%
GOBP_SYNAPTIC_TRANSMISSION_GLUTAMATERGIC	88	0.273502	1.08501	0.248804	0.49407	1	4143	tags=30%, list=21%, signal=37%
GOBP_RENAL_SYSTEM_VASCULATURE_DEVELOPMENT	29	0.340595	1.08493	0.328482	0.493917	1	3616	tags=31%, list=19%, signal=38%
GOBP_POSITIVE_REGULATION_OF_MAST_CELL_ACTIVATION	20	0.386688	1.08484	0.363825	0.493756	1	2641	tags=25%, list=14%, signal=29%
GOBP_CELLULAR_CARBOHYDRATE_BIOSYNTHETIC_PROCESS	73	0.280494	1.08481	0.305882	0.493457	1	4026	tags=29%, list=21%, signal=36%
GOBP_MUSCLE_TISSUE_DEVELOPMENT	367	0.223944	1.08473	0.204268	0.493277	1	3641	tags=23%, list=19%, signal=27%
GOBP_POSITIVE_REGULATION_OF_CYCLASE_ACTIVITY	20	0.374867	1.084	0.347917	0.494554	1	3508	tags=30%, list=18%, signal=37%
GOBP_EXTRACELLULAR_MATRIX_ASSEMBLY	41	0.315387	1.08342	0.334746	0.495557	1	2346	tags=20%, list=12%, signal=22%
GOBP_MACROAUTOPHAGY	280	0.231673	1.08319	0.206587	0.495697	1	3140	tags=20%, list=16%, signal=24%
GOBP_STRIATED_MUSCLE_CELL_DEVELOPMENT	65	0.285221	1.08311	0.311005	0.495498	1	5980	tags=46%, list=31%, signal=66%
GOBP_PLATELET_MORPHOGENESIS	19	0.382498	1.08235	0.334773	0.496788	1	2497	tags=32%, list=13%, signal=36%
GOBP_NEURON_APOPTOTIC_PROCESS	216	0.238807	1.08189	0.228169	0.497473	1	2273	tags=18%, list=12%, signal=20%
GOBP_PROTEIN_MONOUBIQUITINATION	71	0.284071	1.08186	0.305936	0.497173	1	1872	tags=21%, list=10%, signal=23%
GOBP_TUBULIN_DEACETYLATION	20	0.371984	1.08133	0.332604	0.49804	1	2381	tags=25%, list=12%, signal=28%
GOBP_CELL_JUNCTION_MAINTENANCE	37	0.325141	1.08126	0.331096	0.497844	1	3259	tags=27%, list=17%, signal=32%
GOBP_REGULATION_OF_TRIGLYCERIDE_METABOLIC_PROCESS	37	0.319748	1.08116	0.324675	0.497711	1	3207	tags=19%, list=17%, signal=23%
GOBP_REGULATION_OF_ENDOTHELIAL_CELL_DEVELOPMENT	17	0.38655	1.08107	0.358763	0.497541	1	1859	tags=29%, list=10%, signal=32%
GOBP_DICARBOXYLIC_ACID_CATABOLIC_PROCESS	18	0.385494	1.08105	0.35	0.497249	1	4940	tags=50%, list=25%, signal=67%
GOBP_REGULATION_OF_SYSTEMIC_ARTERIAL_BLOOD_PRESSURE_BY_RENIN_ANGIOTENSIN	24	0.361956	1.08051	0.349594	0.498083	1	393	tags=13%, list=2%, signal=13%
GOBP_SYNAPTIC_VESICLE_EXOCYTOSIS	104	0.266312	1.08019	0.282927	0.498456	1	3060	tags=19%, list=16%, signal=23%
GOBP_ORGANELLE_MEMBRANE_FUSION	100	0.26527	1.08018	0.328912	0.498122	1	2689	tags=21%, list=14%, signal=24%
GOBP_PHOTOPERIODISM	30	0.33311	1.07935	0.340381	0.499637	1	3568	tags=37%, list=18%, signal=45%
GOBP_CELLULAR_RESPONSE_TO_ALCOHOL	82	0.277337	1.07904	0.297362	0.49993	1	4327	tags=38%, list=22%, signal=48%
GOBP_POSITIVE_REGULATION_OF_NEURAL_PRECURSOR_CELL_PROLIFERATION	49	0.300168	1.07862	0.325792	0.500553	1	2382	tags=20%, list=12%, signal=23%
GOBP_POSITIVE_REGULATION_OF_DNA_TEMPLATED_TRANSCRIPTION_INITIATION	43	0.304983	1.07861	0.333333	0.500223	1	2830	tags=26%, list=15%, signal=30%
GOBP_INORGANIC_ANION_TRANSMEMBRANE_TRANSPORT	88	0.271276	1.07836	0.306569	0.500443	1	2140	tags=16%, list=11%, signal=18%
GOBP_INTESTINAL_EPITHELIAL_CELL_DIFFERENTIATION	22	0.374173	1.07813	0.363044	0.500621	1	3183	tags=27%, list=16%, signal=33%
GOBP_MATURATION_OF_5_8S_RRNA_FROM_TRICISTRONIC_RRNA_TRANSCRIPT_SSU_RRNA_5_8S_RRNA_LSU_RRNA	22	0.368205	1.07787	0.362222	0.500855	1	4592	tags=36%, list=24%, signal=48%
GOBP_RIBOSOMAL_LARGE_SUBUNIT_ASSEMBLY	18	0.389535	1.07689	0.373695	0.502767	1	3480	tags=33%, list=18%, signal=41%
GOBP_POSITIVE_REGULATION_OF_AMYLOID_BETA_FORMATION	17	0.402413	1.07684	0.380846	0.502515	1	2590	tags=35%, list=13%, signal=41%
GOBP_SKELETAL_MUSCLE_TISSUE_REGENERATION	32	0.336019	1.07639	0.361174	0.503192	1	2483	tags=28%, list=13%, signal=32%
GOBP_ELECTRON_TRANSPORT_CHAIN	139	0.256323	1.07631	0.265957	0.503023	1	5350	tags=40%, list=28%, signal=54%
GOBP_GLUCOSE_METABOLIC_PROCESS	185	0.241163	1.0759	0.252055	0.503594	1	3236	tags=25%, list=17%, signal=30%
GOBP_PHOSPHOLIPASE_C_ACTIVATING_G_PROTEIN_COUPLED_RECEPTOR_SIGNALING_PATHWAY	99	0.267368	1.07532	0.291139	0.504588	1	2746	tags=15%, list=14%, signal=18%
GOBP_SECONDARY_PALATE_DEVELOPMENT	25	0.352172	1.0752	0.318841	0.504533	1	4859	tags=40%, list=25%, signal=53%
GOBP_EMBRYONIC_DIGESTIVE_TRACT_MORPHOGENESIS	17	0.388876	1.07509	0.368635	0.504409	1	3097	tags=35%, list=16%, signal=42%
GOBP_NEUTROPHIL_ACTIVATION_INVOLVED_IN_IMMUNE_RESPONSE	21	0.366332	1.07474	0.342742	0.504835	1	1145	tags=19%, list=6%, signal=20%
GOBP_ENERGY_HOMEOSTASIS	40	0.315595	1.0745	0.320346	0.505041	1	4154	tags=30%, list=21%, signal=38%
GOBP_MITOCHONDRIAL_RESPIRATORY_CHAIN_COMPLEX_ASSEMBLY	77	0.276884	1.07346	0.316327	0.507081	1	4658	tags=34%, list=24%, signal=44%
GOBP_REGULATION_OF_CARDIAC_MUSCLE_CELL_MEMBRANE_REPOLARIZATION	25	0.355226	1.07323	0.347548	0.507301	1	2329	tags=20%, list=12%, signal=23%
GOBP_REGULATION_OF_STRESS_ACTIVATED_PROTEIN_KINASE_SIGNALING_CASCADE	185	0.240778	1.07296	0.267806	0.507522	1	3093	tags=23%, list=16%, signal=27%
GOBP_NEGATIVE_REGULATION_OF_RHO_PROTEIN_SIGNAL_TRANSDUCTION	18	0.379836	1.07274	0.369781	0.507675	1	2498	tags=22%, list=13%, signal=25%
GOBP_NEUROMUSCULAR_PROCESS_CONTROLLING_BALANCE	46	0.302496	1.07237	0.326923	0.508217	1	2118	tags=17%, list=11%, signal=19%
GOBP_RESPONSE_TO_ACETYLCHOLINE	30	0.333899	1.07164	0.343612	0.509588	1	3298	tags=37%, list=17%, signal=44%
GOBP_POSITIVE_REGULATION_OF_CALCIUM_ION_TRANSPORT	107	0.260088	1.0716	0.295812	0.50932	1	4373	tags=27%, list=23%, signal=35%
GOBP_ASTROCYTE_DIFFERENTIATION	74	0.278477	1.07135	0.305288	0.509493	1	2804	tags=23%, list=14%, signal=27%
GOBP_CELLULAR_AMINO_ACID_BIOSYNTHETIC_PROCESS	66	0.284204	1.07127	0.332506	0.509321	1	3453	tags=29%, list=18%, signal=35%
GOBP_REGULATION_OF_GENERATION_OF_PRECURSOR_METABOLITES_AND_ENERGY	114	0.259235	1.07102	0.321608	0.509517	1	2372	tags=22%, list=12%, signal=25%
GOBP_PITUITARY_GLAND_DEVELOPMENT	41	0.318576	1.07061	0.350333	0.510098	1	2348	tags=17%, list=12%, signal=19%
GOBP_GENERATION_OF_PRECURSOR_METABOLITES_AND_ENERGY	422	0.219215	1.06969	0.199386	0.511941	1	3568	tags=24%, list=18%, signal=28%
GOBP_CARBOXYLIC_ACID_TRANSPORT	262	0.230049	1.06922	0.261128	0.512659	1	3091	tags=20%, list=16%, signal=24%
GOBP_REGULATION_OF_BIOMINERALIZATION	94	0.266211	1.06907	0.329384	0.512658	1	3641	tags=22%, list=19%, signal=27%
GOBP_POSITIVE_REGULATION_OF_STRESS_FIBER_ASSEMBLY	48	0.304211	1.06898	0.32766	0.512488	1	1482	tags=17%, list=8%, signal=18%
GOBP_EYE_PHOTORECEPTOR_CELL_DIFFERENTIATION	43	0.309695	1.06865	0.349537	0.512878	1	2553	tags=19%, list=13%, signal=21%
GOBP_MAINTENANCE_OF_SYNAPSE_STRUCTURE	20	0.374611	1.06857	0.371429	0.512735	1	5088	tags=45%, list=26%, signal=61%
GOBP_PEPTIDYL_L_CYSTEINE_S_PALMITOYLATION	24	0.358933	1.06829	0.374741	0.513034	1	2363	tags=25%, list=12%, signal=28%
GOBP_BASE_CONVERSION_OR_SUBSTITUTION_EDITING	19	0.377437	1.06809	0.340206	0.513141	1	2878	tags=21%, list=15%, signal=25%
GOBP_POSITIVE_REGULATION_OF_DNA_TEMPLATED_TRANSCRIPTION_ELONGATION	26	0.34964	1.06799	0.346639	0.513015	1	2894	tags=35%, list=15%, signal=41%
GOBP_REGULATION_OF_MICROTUBULE_POLYMERIZATION_OR_DEPOLYMERIZATION	76	0.270194	1.06753	0.317308	0.513731	1	2613	tags=22%, list=13%, signal=26%
GOBP_REGULATION_OF_RECEPTOR_INTERNALIZATION	56	0.285961	1.06667	0.316397	0.515384	1	5140	tags=36%, list=26%, signal=48%
GOBP_RESPONSE_TO_ACTIVITY	62	0.285597	1.06611	0.318605	0.516279	1	2462	tags=21%, list=13%, signal=24%
GOBP_ORGANOPHOSPHATE_CATABOLIC_PROCESS	143	0.248267	1.06436	0.306283	0.52003	1	1822	tags=16%, list=9%, signal=18%
GOBP_LIPID_MODIFICATION	194	0.236302	1.06418	0.288265	0.520102	1	4659	tags=32%, list=24%, signal=42%
GOBP_NEURON_FATE_COMMITMENT	62	0.285684	1.06385	0.349776	0.520507	1	2603	tags=18%, list=13%, signal=20%
GOBP_POSITIVE_REGULATION_OF_MRNA_PROCESSING	28	0.34121	1.0638	0.345055	0.520285	1	5863	tags=39%, list=30%, signal=56%
GOBP_PROTEIN_PALMITOYLATION	32	0.334871	1.06355	0.36933	0.52048	1	3386	tags=28%, list=17%, signal=34%
GOBP_CEREBELLAR_PURKINJE_CELL_LAYER_MORPHOGENESIS	16	0.396499	1.06349	0.387164	0.520238	1	730	tags=19%, list=4%, signal=19%
GOBP_RNA_MODIFICATION	149	0.245269	1.06315	0.279891	0.520627	1	5171	tags=30%, list=27%, signal=41%
GOBP_VASCULAR_WOUND_HEALING	16	0.391067	1.06314	0.388889	0.520284	1	251	tags=25%, list=1%, signal=25%
GOBP_REGULATION_OF_MYELINATION	46	0.3004	1.0626	0.354067	0.521181	1	2002	tags=20%, list=10%, signal=22%
GOBP_CALCIUM_ION_REGULATED_EXOCYTOSIS_OF_NEUROTRANSMITTER	17	0.394335	1.06254	0.391213	0.520941	1	4256	tags=35%, list=22%, signal=45%
GOBP_JNK_CASCADE	161	0.246029	1.06181	0.294737	0.522315	1	4136	tags=26%, list=21%, signal=33%
GOBP_REGULATION_OF_TRANSLATIONAL_INITIATION	70	0.278381	1.0617	0.353468	0.522211	1	4623	tags=39%, list=24%, signal=50%
GOBP_CHLORIDE_TRANSMEMBRANE_TRANSPORT	64	0.282435	1.06163	0.343545	0.521992	1	1155	tags=13%, list=6%, signal=13%
GOBP_GLUTAMATE_RECEPTOR_SIGNALING_PATHWAY	49	0.298769	1.06144	0.37045	0.522101	1	5198	tags=35%, list=27%, signal=47%
GOBP_CERAMIDE_BIOSYNTHETIC_PROCESS	62	0.287984	1.06137	0.343066	0.521892	1	2676	tags=26%, list=14%, signal=30%
GOBP_CELL_MIGRATION_INVOLVED_IN_HEART_DEVELOPMENT	20	0.362624	1.06133	0.37355	0.521603	1	3636	tags=35%, list=19%, signal=43%
GOBP_CARDIAC_MUSCLE_CELL_PROLIFERATION	44	0.297369	1.0611	0.353945	0.521775	1	5845	tags=55%, list=30%, signal=78%
GOBP_POSITIVE_REGULATION_OF_SMOOTHENED_SIGNALING_PATHWAY	32	0.330453	1.06092	0.358079	0.521831	1	2153	tags=22%, list=11%, signal=25%
GOBP_ASTROCYTE_DEVELOPMENT	38	0.315701	1.05979	0.367615	0.524173	1	2684	tags=21%, list=14%, signal=24%
GOBP_NEGATIVE_REGULATION_OF_DNA_REPAIR	26	0.337894	1.05978	0.345833	0.523829	1	2840	tags=35%, list=15%, signal=40%
GOBP_T_CELL_HOMEOSTASIS	39	0.310906	1.05956	0.357631	0.52398	1	5353	tags=41%, list=28%, signal=57%
GOBP_LYMPHOID_PROGENITOR_CELL_DIFFERENTIATION	21	0.358625	1.05905	0.389362	0.524815	1	5340	tags=43%, list=28%, signal=59%
GOBP_NEGATIVE_REGULATION_OF_REGULATED_SECRETORY_PATHWAY	24	0.354514	1.05873	0.362725	0.525219	1	2888	tags=29%, list=15%, signal=34%
GOBP_NEGATIVE_REGULATION_OF_LIPID_BIOSYNTHETIC_PROCESS	51	0.291902	1.05873	0.355263	0.524857	1	3091	tags=22%, list=16%, signal=26%
GOBP_REGULATION_OF_DNA_TEMPLATED_TRANSCRIPTION_INITIATION	53	0.299375	1.05858	0.366446	0.524879	1	5442	tags=43%, list=28%, signal=60%
GOBP_HEMATOPOIETIC_STEM_CELL_DIFFERENTIATION	29	0.337012	1.05854	0.373602	0.524593	1	5359	tags=48%, list=28%, signal=67%
GOBP_REGULATION_OF_ACTOMYOSIN_STRUCTURE_ORGANIZATION	89	0.270139	1.0582	0.356643	0.525035	1	2153	tags=18%, list=11%, signal=20%
GOBP_POSTSYNAPTIC_SIGNAL_TRANSDUCTION	36	0.322132	1.05787	0.367521	0.525455	1	6075	tags=58%, list=31%, signal=85%
GOBP_WOUND_HEALING_SPREADING_OF_EPIDERMAL_CELLS	18	0.376993	1.05781	0.388462	0.525226	1	3098	tags=39%, list=16%, signal=46%
GOBP_PROTEIN_LOCALIZATION_TO_EXTRACELLULAR_REGION	326	0.226888	1.05724	0.257143	0.526172	1	2524	tags=17%, list=13%, signal=19%
GOBP_POSITIVE_REGULATION_OF_LIPID_METABOLIC_PROCESS	140	0.244679	1.05701	0.291339	0.526348	1	3693	tags=26%, list=19%, signal=32%
GOBP_ORGANIC_HYDROXY_COMPOUND_BIOSYNTHETIC_PROCESS	228	0.229838	1.05701	0.284884	0.525986	1	2976	tags=18%, list=15%, signal=22%
GOBP_NEUTRAL_LIPID_CATABOLIC_PROCESS	40	0.314741	1.05658	0.367965	0.52667	1	2733	tags=20%, list=14%, signal=23%
GOBP_MAST_CELL_ACTIVATION_INVOLVED_IN_IMMUNE_RESPONSE	55	0.29172	1.05644	0.362613	0.526646	1	3093	tags=24%, list=16%, signal=28%
GOBP_ENDOTHELIUM_DEVELOPMENT	122	0.254474	1.05612	0.334842	0.527009	1	2531	tags=18%, list=13%, signal=21%
GOBP_POSITIVE_REGULATION_OF_COLD_INDUCED_THERMOGENESIS	97	0.259087	1.05551	0.336516	0.528124	1	2973	tags=27%, list=15%, signal=31%
GOBP_POSITIVE_REGULATION_OF_LIPID_CATABOLIC_PROCESS	26	0.338469	1.05516	0.383966	0.528567	1	3490	tags=35%, list=18%, signal=42%
GOBP_GAMMA_AMINOBUTYRIC_ACID_SIGNALING_PATHWAY	26	0.354196	1.05451	0.370787	0.529745	1	938	tags=15%, list=5%, signal=16%
GOBP_INNER_EAR_RECEPTOR_CELL_STEREOCILIUM_ORGANIZATION	28	0.33393	1.05401	0.378723	0.530563	1	2810	tags=29%, list=14%, signal=33%
GOBP_HETEROTYPIC_CELL_CELL_ADHESION	61	0.286967	1.05323	0.353488	0.532022	1	1056	tags=15%, list=5%, signal=16%
GOBP_UTERUS_DEVELOPMENT	18	0.376207	1.05293	0.39501	0.532331	1	4677	tags=39%, list=24%, signal=51%
GOBP_RENAL_SYSTEM_PROCESS	105	0.254211	1.05282	0.323232	0.532248	1	2110	tags=15%, list=11%, signal=17%
GOBP_CARDIAC_MUSCLE_CELL_ACTION_POTENTIAL_INVOLVED_IN_CONTRACTION	48	0.296888	1.0522	0.36933	0.533349	1	2329	tags=21%, list=12%, signal=24%
GOBP_SYNAPTIC_TRANSMISSION_CHOLINERGIC	28	0.341419	1.0511	0.4	0.535697	1	5688	tags=43%, list=29%, signal=61%
GOBP_NEGATIVE_REGULATION_OF_CELLULAR_MACROMOLECULE_BIOSYNTHETIC_PROCESS	221	0.2327	1.05096	0.292958	0.535642	1	4237	tags=29%, list=22%, signal=36%
GOBP_POSITIVE_REGULATION_OF_LONG_TERM_SYNAPTIC_POTENTIATION	21	0.366379	1.05058	0.392704	0.536136	1	5732	tags=43%, list=30%, signal=61%
GOBP_RETINA_MORPHOGENESIS_IN_CAMERA_TYPE_EYE	56	0.287925	1.0499	0.356807	0.537312	1	3084	tags=20%, list=16%, signal=23%
GOBP_POSITIVE_REGULATION_OF_LYASE_ACTIVITY	21	0.363408	1.0489	0.391393	0.539319	1	1154	tags=14%, list=6%, signal=15%
GOBP_LYMPH_NODE_DEVELOPMENT	18	0.36735	1.04853	0.370062	0.539863	1	6424	tags=56%, list=33%, signal=83%
GOBP_REGULATION_OF_LONG_TERM_SYNAPTIC_POTENTIATION	42	0.303888	1.04844	0.366167	0.539708	1	3843	tags=26%, list=20%, signal=33%
GOBP_ANDROGEN_RECEPTOR_SIGNALING_PATHWAY	43	0.306336	1.04757	0.38512	0.541415	1	2764	tags=23%, list=14%, signal=27%
GOBP_SUBSTRATE_DEPENDENT_CELL_MIGRATION	24	0.34816	1.04753	0.38055	0.541167	1	2969	tags=21%, list=15%, signal=25%
GOBP_CELL_COMMUNICATION_INVOLVED_IN_CARDIAC_CONDUCTION	56	0.283494	1.04671	0.389978	0.542767	1	2107	tags=20%, list=11%, signal=22%
GOBP_CYCLIC_NUCLEOTIDE_METABOLIC_PROCESS	36	0.318472	1.04642	0.396018	0.543135	1	2932	tags=25%, list=15%, signal=29%
GOBP_POSITIVE_REGULATION_OF_CALCIUM_MEDIATED_SIGNALING	27	0.331614	1.04596	0.38758	0.543846	1	4466	tags=41%, list=23%, signal=53%
GOBP_BARBED_END_ACTIN_FILAMENT_CAPPING	18	0.377167	1.04553	0.38664	0.54449	1	4356	tags=33%, list=22%, signal=43%
GOBP_SEQUESTERING_OF_CALCIUM_ION	117	0.250321	1.04512	0.320802	0.545099	1	2245	tags=18%, list=12%, signal=20%
GOBP_REGULATION_OF_CELL_CELL_ADHESION_MEDIATED_BY_CADHERIN	19	0.36914	1.04497	0.383158	0.545126	1	2346	tags=21%, list=12%, signal=24%
GOBP_REGULATION_OF_OXIDATIVE_STRESS_INDUCED_INTRINSIC_APOPTOTIC_SIGNALING_PATHWAY	26	0.333845	1.04445	0.4098	0.546027	1	3121	tags=27%, list=16%, signal=32%
GOBP_SENSORY_PERCEPTION_OF_PAIN	91	0.26029	1.04341	0.363855	0.548202	1	3195	tags=20%, list=16%, signal=24%
GOBP_ENERGY_DERIVATION_BY_OXIDATION_OF_ORGANIC_COMPOUNDS	265	0.225089	1.04274	0.325949	0.549438	1	5605	tags=36%, list=29%, signal=50%
GOBP_PROTEIN_LOCALIZATION_TO_POSTSYNAPSE	34	0.319004	1.04254	0.404494	0.549524	1	2504	tags=21%, list=13%, signal=24%
GOBP_PROTEIN_TRANSMEMBRANE_IMPORT_INTO_INTRACELLULAR_ORGANELLE	32	0.322682	1.04091	0.388655	0.553136	1	4400	tags=34%, list=23%, signal=44%
GOBP_REGULATION_OF_CATION_CHANNEL_ACTIVITY	147	0.243148	1.04064	0.352304	0.553426	1	3843	tags=24%, list=20%, signal=30%
GOBP_REGULATION_OF_RESPONSE_TO_DNA_DAMAGE_STIMULUS	210	0.231735	1.04035	0.340599	0.553731	1	2940	tags=22%, list=15%, signal=26%
GOBP_PROTEIN_COMPLEX_OLIGOMERIZATION	231	0.228466	1.03974	0.337875	0.554789	1	3021	tags=17%, list=16%, signal=20%
GOBP_RETROGRADE_TRANSPORT_ENDOSOME_TO_GOLGI	79	0.264294	1.03971	0.355556	0.554498	1	4867	tags=33%, list=25%, signal=44%
GOBP_THYMIC_T_CELL_SELECTION	22	0.361044	1.03907	0.39485	0.555657	1	6437	tags=55%, list=33%, signal=82%
GOBP_MITOCHONDRIAL_DNA_METABOLIC_PROCESS	15	0.387785	1.03877	0.408805	0.556019	1	2065	tags=27%, list=11%, signal=30%
GOBP_ENDOCRINE_SYSTEM_DEVELOPMENT	129	0.246673	1.03868	0.372973	0.555876	1	3097	tags=21%, list=16%, signal=25%
GOBP_NEGATIVE_REGULATION_OF_NOTCH_SIGNALING_PATHWAY	33	0.319277	1.03767	0.411379	0.557921	1	4372	tags=39%, list=23%, signal=51%
GOBP_PHOSPHATIDIC_ACID_METABOLIC_PROCESS	35	0.309585	1.0373	0.39486	0.558393	1	3983	tags=31%, list=21%, signal=39%
GOBP_RIBOSE_PHOSPHATE_METABOLIC_PROCESS	337	0.21706	1.03727	0.295652	0.55808	1	3346	tags=23%, list=17%, signal=27%
GOBP_HISTONE_H2A_ACETYLATION	20	0.353995	1.03721	0.420382	0.557848	1	2021	tags=25%, list=10%, signal=28%
GOBP_GLUTAMATE_SECRETION	25	0.340261	1.03642	0.398323	0.5594	1	1062	tags=16%, list=5%, signal=17%
GOBP_GLYCEROLIPID_BIOSYNTHETIC_PROCESS	225	0.228516	1.03482	0.354467	0.562914	1	3145	tags=20%, list=16%, signal=24%
GOBP_STRIATED_MUSCLE_CONTRACTION	159	0.237986	1.03407	0.354497	0.564322	1	2329	tags=17%, list=12%, signal=19%
GOBP_SUPEROXIDE_METABOLIC_PROCESS	63	0.277712	1.03347	0.393258	0.565389	1	3624	tags=24%, list=19%, signal=29%
GOBP_NEGATIVE_REGULATION_OF_ENDOCYTOSIS	50	0.288588	1.03341	0.401766	0.565169	1	1583	tags=16%, list=8%, signal=17%
GOBP_POSITIVE_REGULATION_OF_CARTILAGE_DEVELOPMENT	27	0.327549	1.03315	0.407407	0.565387	1	6522	tags=52%, list=34%, signal=78%
GOBP_CELLULAR_RESPONSE_TO_NUTRIENT	40	0.304988	1.03251	0.391398	0.566663	1	4601	tags=33%, list=24%, signal=43%
GOBP_TRANSLATIONAL_INITIATION	102	0.253763	1.03155	0.403226	0.568694	1	4261	tags=31%, list=22%, signal=40%
GOBP_EMBRYONIC_PATTERN_SPECIFICATION	70	0.271634	1.03125	0.377724	0.569058	1	4225	tags=30%, list=22%, signal=38%
GOBP_CELL_AGGREGATION	20	0.356917	1.03032	0.434156	0.570972	1	4241	tags=25%, list=22%, signal=32%
GOBP_REGULATION_OF_GOLGI_ORGANIZATION	17	0.373807	1.03018	0.426877	0.570936	1	3634	tags=41%, list=19%, signal=51%
GOBP_REGULATION_OF_PROTEIN_CONTAINING_COMPLEX_DISASSEMBLY	103	0.255485	1.03013	0.373684	0.57067	1	4010	tags=27%, list=21%, signal=34%
GOBP_NEURON_PROJECTION_ORGANIZATION	80	0.263301	1.02988	0.383178	0.570891	1	3997	tags=26%, list=21%, signal=33%
GOBP_DOSAGE_COMPENSATION	16	0.376956	1.02823	0.416162	0.574543	1	1186	tags=25%, list=6%, signal=27%
GOBP_AMYLOID_BETA_CLEARANCE	35	0.311026	1.02814	0.40678	0.574398	1	1903	tags=20%, list=10%, signal=22%
GOBP_CATECHOL_CONTAINING_COMPOUND_METABOLIC_PROCESS	49	0.2912	1.02779	0.388412	0.574886	1	1203	tags=12%, list=6%, signal=13%
GOBP_PROTEOGLYCAN_BIOSYNTHETIC_PROCESS	55	0.283737	1.02716	0.41055	0.576054	1	1129	tags=11%, list=6%, signal=12%
GOBP_NEGATIVE_REGULATION_OF_PROTEIN_POLYMERIZATION	67	0.269071	1.02708	0.379545	0.575859	1	2969	tags=25%, list=15%, signal=30%
GOBP_GLUTATHIONE_METABOLIC_PROCESS	58	0.280991	1.02661	0.419069	0.576663	1	3862	tags=33%, list=20%, signal=41%
GOBP_OSTEOCLAST_DIFFERENTIATION	90	0.255506	1.02622	0.40625	0.577232	1	2997	tags=22%, list=15%, signal=26%
GOBP_POSITIVE_REGULATION_OF_PROTEIN_SERINE_THREONINE_KINASE_ACTIVITY	194	0.230176	1.02616	0.401734	0.576999	1	3098	tags=22%, list=16%, signal=26%
GOBP_THIOESTER_METABOLIC_PROCESS	86	0.263117	1.02493	0.392941	0.579718	1	3346	tags=28%, list=17%, signal=34%
GOBP_POSITIVE_REGULATION_OF_NUCLEOTIDE_METABOLIC_PROCESS	37	0.31012	1.02461	0.392241	0.580111	1	2372	tags=22%, list=12%, signal=25%
GOBP_POSITIVE_REGULATION_OF_CALCIUM_ION_TRANSMEMBRANE_TRANSPORT	63	0.274052	1.02451	0.416862	0.579981	1	2581	tags=17%, list=13%, signal=20%
GOBP_PYRIDINE_CONTAINING_COMPOUND_METABOLIC_PROCESS	35	0.310703	1.02443	0.38785	0.57982	1	1467	tags=20%, list=8%, signal=22%
GOBP_PHOSPHATE_ION_TRANSPORT	24	0.338775	1.02404	0.414317	0.580372	1	2951	tags=25%, list=15%, signal=29%
GOBP_GLOMERULAR_MESANGIUM_DEVELOPMENT	16	0.370922	1.02366	0.39798	0.580972	1	3616	tags=38%, list=19%, signal=46%
GOBP_IRON_ION_HOMEOSTASIS	76	0.264937	1.02309	0.430693	0.582031	1	2931	tags=20%, list=15%, signal=23%
GOBP_MEMBRANE_REPOLARIZATION	45	0.294493	1.02279	0.418103	0.58242	1	2335	tags=20%, list=12%, signal=23%
GOBP_POSTSYNAPTIC_SPECIALIZATION_ORGANIZATION	32	0.309591	1.02273	0.418182	0.582158	1	1880	tags=22%, list=10%, signal=24%
GOBP_CELLULAR_MODIFIED_AMINO_ACID_CATABOLIC_PROCESS	31	0.318377	1.02231	0.436123	0.582833	1	3020	tags=19%, list=16%, signal=23%
GOBP_ESTABLISHMENT_OF_PROTEIN_LOCALIZATION_TO_MEMBRANE	227	0.225715	1.02108	0.411268	0.585461	1	2489	tags=17%, list=13%, signal=19%
GOBP_CARDIAC_MUSCLE_CELL_CONTRACTION	67	0.272433	1.02041	0.431193	0.586748	1	3055	tags=24%, list=16%, signal=28%
GOBP_PHOSPHATIDYLETHANOLAMINE_METABOLIC_PROCESS	20	0.351196	1.02008	0.428879	0.587201	1	4792	tags=35%, list=25%, signal=46%
GOBP_REGULATION_OF_CELL_MORPHOGENESIS_INVOLVED_IN_DIFFERENTIATION	88	0.257024	1.01922	0.409756	0.589066	1	3098	tags=23%, list=16%, signal=27%
GOBP_REGULATION_OF_ORGANELLE_ASSEMBLY	199	0.226713	1.01831	0.40176	0.590995	1	2439	tags=19%, list=13%, signal=22%
GOBP_ACUTE_INFLAMMATORY_RESPONSE_TO_ANTIGENIC_STIMULUS	23	0.340805	1.01821	0.445148	0.590851	1	5346	tags=43%, list=28%, signal=60%
GOBP_PROTON_TRANSMEMBRANE_TRANSPORT	119	0.24236	1.01755	0.404358	0.592115	1	5145	tags=32%, list=27%, signal=43%
GOBP_NEGATIVE_REGULATION_OF_PROTEIN_LOCALIZATION_TO_MEMBRANE	31	0.321712	1.01687	0.399151	0.593454	1	2594	tags=29%, list=13%, signal=33%
GOBP_NEGATIVE_REGULATION_OF_TELOMERE_MAINTENANCE_VIA_TELOMERASE	16	0.372416	1.01684	0.441558	0.593134	1	3209	tags=38%, list=17%, signal=45%
GOBP_PALLIUM_DEVELOPMENT	155	0.233972	1.0161	0.42246	0.594621	1	4430	tags=29%, list=23%, signal=37%
GOBP_AMINO_ACID_BETAINE_METABOLIC_PROCESS	16	0.376549	1.01578	0.427984	0.594999	1	1502	tags=25%, list=8%, signal=27%
GOBP_NEGATIVE_REGULATION_OF_CHONDROCYTE_DIFFERENTIATION	19	0.360149	1.01475	0.439331	0.597162	1	1481	tags=16%, list=8%, signal=17%
GOBP_RESPONSE_TO_ESTROGEN	62	0.273589	1.01474	0.422727	0.596805	1	2153	tags=19%, list=11%, signal=22%
GOBP_NEUROTRANSMITTER_RECEPTOR_LOCALIZATION_TO_POSTSYNAPTIC_SPECIALIZATION_MEMBRANE	16	0.374455	1.01471	0.44206	0.596478	1	2504	tags=25%, list=13%, signal=29%
GOBP_REGULATION_OF_STEM_CELL_PROLIFERATION	38	0.300934	1.01471	0.413242	0.5961	1	2278	tags=26%, list=12%, signal=30%
GOBP_MUSCLE_SYSTEM_PROCESS	395	0.209038	1.01455	0.39604	0.596102	1	3155	tags=19%, list=16%, signal=22%
GOBP_NEGATIVE_REGULATION_OF_FATTY_ACID_METABOLIC_PROCESS	24	0.334231	1.01426	0.420833	0.596432	1	2764	tags=21%, list=14%, signal=24%
GOBP_FOREBRAIN_REGIONALIZATION	23	0.333136	1.01406	0.435622	0.596537	1	5602	tags=48%, list=29%, signal=67%
GOBP_HEPATOCYTE_APOPTOTIC_PROCESS	16	0.376049	1.01374	0.440252	0.597006	1	5723	tags=56%, list=29%, signal=80%
GOBP_RESPONSE_TO_AXON_INJURY	76	0.266078	1.01367	0.4375	0.5968	1	4375	tags=29%, list=23%, signal=37%
GOBP_POSITIVE_REGULATION_OF_ESTABLISHMENT_OF_PROTEIN_LOCALIZATION_TO_MITOCHONDRION	33	0.307028	1.01266	0.412147	0.598912	1	2590	tags=21%, list=13%, signal=24%
GOBP_SMOOTH_MUSCLE_CELL_APOPTOTIC_PROCESS	19	0.359389	1.0124	0.443992	0.599227	1	3390	tags=37%, list=17%, signal=45%
GOBP_POSITIVE_REGULATION_OF_MYELOID_LEUKOCYTE_DIFFERENTIATION	52	0.279123	1.01199	0.447489	0.599869	1	2128	tags=15%, list=11%, signal=17%
GOBP_SCHWANN_CELL_DEVELOPMENT	30	0.31074	1.01188	0.442177	0.599737	1	2002	tags=30%, list=10%, signal=33%
GOBP_NEGATIVE_REGULATION_OF_T_CELL_RECEPTOR_SIGNALING_PATHWAY	25	0.321347	1.01077	0.42766	0.602231	1	2622	tags=32%, list=14%, signal=37%
GOBP_REGULATION_OF_MAP_KINASE_ACTIVITY	176	0.230417	1.01035	0.42328	0.602928	1	4013	tags=27%, list=21%, signal=34%
GOBP_NEURONAL_STEM_CELL_POPULATION_MAINTENANCE	23	0.342104	1.00931	0.418502	0.605247	1	2410	tags=26%, list=12%, signal=30%
GOBP_PEPTIDYL_TYROSINE_MODIFICATION	353	0.211294	1.00891	0.423453	0.605861	1	2531	tags=17%, list=13%, signal=19%
GOBP_GLYCEROPHOSPHOLIPID_BIOSYNTHETIC_PROCESS	193	0.226817	1.00859	0.423181	0.606261	1	3144	tags=20%, list=16%, signal=24%
GOBP_MUSCLE_CONTRACTION	321	0.212134	1.00731	0.43038	0.609086	1	3055	tags=18%, list=16%, signal=21%
GOBP_NADH_DEHYDROGENASE_COMPLEX_ASSEMBLY	46	0.286552	1.0065	0.446512	0.610704	1	4658	tags=35%, list=24%, signal=46%
GOBP_OVARIAN_FOLLICLE_DEVELOPMENT	54	0.274665	1.00617	0.443936	0.611157	1	5829	tags=46%, list=30%, signal=66%
GOBP_COMPLEMENT_ACTIVATION_ALTERNATIVE_PATHWAY	16	0.369486	1.00603	0.443975	0.611116	1	945	tags=13%, list=5%, signal=13%
GOBP_STEROID_HORMONE_SECRETION	21	0.348701	1.00572	0.449275	0.611499	1	6805	tags=52%, list=35%, signal=81%
GOBP_NEGATIVE_REGULATION_OF_ACTIN_FILAMENT_DEPOLYMERIZATION	36	0.298363	1.0053	0.470199	0.612132	1	1911	tags=19%, list=10%, signal=22%
GOBP_RESPONSE_TO_AMINE	43	0.293791	1.00489	0.420225	0.612802	1	1185	tags=14%, list=6%, signal=15%
GOBP_CARDIAC_ATRIUM_DEVELOPMENT	33	0.307685	1.00422	0.446556	0.614131	1	697	tags=9%, list=4%, signal=9%
GOBP_REGULATION_OF_G_PROTEIN_COUPLED_RECEPTOR_SIGNALING_PATHWAY	133	0.237684	1.00421	0.444169	0.613767	1	3753	tags=26%, list=19%, signal=32%
GOBP_POSITIVE_REGULATION_OF_AMYLOID_PRECURSOR_PROTEIN_CATABOLIC_PROCESS	22	0.335846	1.00377	0.443992	0.614526	1	3093	tags=32%, list=16%, signal=38%
GOBP_POSITIVE_REGULATION_OF_PEPTIDYL_THREONINE_PHOSPHORYLATION	27	0.321895	1.00354	0.449782	0.614748	1	4915	tags=41%, list=25%, signal=54%
GOBP_POSITIVE_REGULATION_OF_ENDOTHELIAL_CELL_PROLIFERATION	86	0.256999	1.0035	0.452261	0.61444	1	5483	tags=41%, list=28%, signal=56%
GOBP_TRANSCRIPTION_BY_RNA_POLYMERASE_III	51	0.280222	1.00227	0.440347	0.617246	1	2568	tags=22%, list=13%, signal=25%
GOBP_POSITIVE_REGULATION_OF_AMINO_ACID_TRANSPORT	22	0.342143	1.00226	0.451542	0.61689	1	669	tags=14%, list=3%, signal=14%
GOBP_MULTICELLULAR_ORGANISMAL_RESPONSE_TO_STRESS	73	0.259463	1.00202	0.46988	0.617143	1	5480	tags=37%, list=28%, signal=51%
GOBP_ODONTOGENESIS	123	0.240044	1.00196	0.432	0.616897	1	4769	tags=28%, list=25%, signal=36%
GOBP_NEGATIVE_REGULATION_OF_GLIOGENESIS	37	0.299587	1.00196	0.418764	0.616506	1	5695	tags=41%, list=29%, signal=57%
GOBP_GLUTAMINE_FAMILY_AMINO_ACID_BIOSYNTHETIC_PROCESS	15	0.376181	1.00186	0.43129	0.61636	1	4003	tags=53%, list=21%, signal=67%
GOBP_GLYCOPROTEIN_METABOLIC_PROCESS	347	0.209784	1.00179	0.450658	0.616145	1	2966	tags=18%, list=15%, signal=21%
GOBP_FATTY_ACID_METABOLIC_PROCESS	361	0.209993	1.00117	0.481132	0.617338	1	3935	tags=26%, list=20%, signal=32%
GOBP_LIPOSACCHARIDE_METABOLIC_PROCESS	96	0.2482	1.00071	0.42446	0.618129	1	4511	tags=31%, list=23%, signal=41%
GOBP_POSITIVE_REGULATION_OF_PROTEIN_SECRETION	122	0.238698	1.00032	0.438144	0.618754	1	4083	tags=25%, list=21%, signal=31%
GOBP_GLUCAN_BIOSYNTHETIC_PROCESS	39	0.292122	0.99963	0.45629	0.620127	1	3236	tags=28%, list=17%, signal=34%
GOBP_PLASMA_MEMBRANE_FUSION	18	0.348564	0.99939	0.472527	0.62037	1	4601	tags=28%, list=24%, signal=36%
GOBP_PROTEIN_LIPID_COMPLEX_SUBUNIT_ORGANIZATION	45	0.283839	0.99929	0.456818	0.620235	1	2280	tags=20%, list=12%, signal=23%
GOBP_ESTABLISHMENT_OR_MAINTENANCE_OF_BIPOLAR_CELL_POLARITY	46	0.28182	0.998761	0.476615	0.62119	1	1440	tags=11%, list=7%, signal=12%
GOBP_TRANSMISSION_OF_NERVE_IMPULSE	68	0.261504	0.998278	0.463768	0.622076	1	2898	tags=18%, list=15%, signal=21%
GOBP_NEGATIVE_REGULATION_OF_PROTEASOMAL_UBIQUITIN_DEPENDENT_PROTEIN_CATABOLIC_PROCESS	33	0.310591	0.998262	0.447983	0.62172	1	2931	tags=24%, list=15%, signal=29%
GOBP_REGULATION_OF_POSTSYNAPTIC_MEMBRANE_POTENTIAL	123	0.23822	0.998199	0.44359	0.621476	1	5922	tags=41%, list=31%, signal=58%
GOBP_SPECIFICATION_OF_ANIMAL_ORGAN_IDENTITY	37	0.293297	0.997414	0.453027	0.623125	1	1381	tags=8%, list=7%, signal=9%
GOBP_REGULATION_OF_AMPA_RECEPTOR_ACTIVITY	24	0.326496	0.997215	0.436975	0.623238	1	3843	tags=25%, list=20%, signal=31%
GOBP_EMBRYONIC_HEMOPOIESIS	24	0.325689	0.997112	0.450855	0.623085	1	2894	tags=29%, list=15%, signal=34%
GOBP_PYRIMIDINE_NUCLEOTIDE_CATABOLIC_PROCESS	18	0.348521	0.99692	0.468041	0.623176	1	1791	tags=22%, list=9%, signal=24%
GOBP_POSITIVE_REGULATION_OF_MAP_KINASE_ACTIVITY	113	0.244166	0.996382	0.447368	0.62416	1	4013	tags=27%, list=21%, signal=33%
GOBP_MEGAKARYOCYTE_DEVELOPMENT	15	0.369366	0.996143	0.466135	0.624423	1	5340	tags=47%, list=28%, signal=64%
GOBP_MUSCLE_CELL_MIGRATION	77	0.255426	0.995873	0.472019	0.624722	1	1632	tags=16%, list=8%, signal=17%
GOBP_NEPHRON_EPITHELIUM_DEVELOPMENT	109	0.241812	0.995168	0.46778	0.626099	1	2861	tags=19%, list=15%, signal=22%
GOBP_ENDOTHELIAL_CELL_CHEMOTAXIS	27	0.316736	0.994087	0.467505	0.628457	1	6272	tags=56%, list=32%, signal=82%
GOBP_REGULATION_OF_BROWN_FAT_CELL_DIFFERENTIATION	20	0.346471	0.994033	0.473002	0.628189	1	3277	tags=40%, list=17%, signal=48%
GOBP_MUSCLE_ORGAN_DEVELOPMENT	304	0.211013	0.993883	0.492355	0.628181	1	2836	tags=18%, list=15%, signal=21%
GOBP_DIACYLGLYCEROL_METABOLIC_PROCESS	21	0.333839	0.9932	0.457086	0.629536	1	979	tags=14%, list=5%, signal=15%
GOBP_FUSION_OF_SPERM_TO_EGG_PLASMA_MEMBRANE_INVOLVED_IN_SINGLE_FERTILIZATION	17	0.357972	0.992969	0.461373	0.629737	1	2899	tags=18%, list=15%, signal=21%
GOBP_CHEMOSENSORY_BEHAVIOR	16	0.359893	0.992933	0.443515	0.629435	1	5090	tags=50%, list=26%, signal=68%
GOBP_POSITIVE_REGULATION_OF_TOR_SIGNALING	43	0.285492	0.992855	0.463265	0.629245	1	7067	tags=49%, list=36%, signal=77%
GOBP_REGULATION_OF_TRIGLYCERIDE_BIOSYNTHETIC_PROCESS	18	0.362757	0.992847	0.483193	0.628871	1	23	tags=6%, list=0%, signal=6%
GOBP_PROTEIN_HOMOOLIGOMERIZATION	179	0.223858	0.992259	0.491713	0.62998	1	2970	tags=16%, list=15%, signal=18%
GOBP_FEAR_RESPONSE	37	0.300559	0.991973	0.434125	0.630325	1	2152	tags=14%, list=11%, signal=15%
GOBP_REGULATION_OF_GLUCOSE_IMPORT	52	0.279225	0.991732	0.476543	0.630547	1	2590	tags=19%, list=13%, signal=22%
GOBP_RESPONSE_TO_ISOQUINOLINE_ALKALOID	27	0.320551	0.991127	0.485043	0.631685	1	1969	tags=19%, list=10%, signal=21%
GOBP_APOPTOTIC_CELL_CLEARANCE	49	0.280885	0.991005	0.446262	0.631608	1	1499	tags=10%, list=8%, signal=11%
GOBP_REGULATION_OF_TOR_SIGNALING	88	0.250109	0.990687	0.474178	0.632035	1	4692	tags=34%, list=24%, signal=45%
GOBP_POSITIVE_REGULATION_OF_INTERLEUKIN_17_PRODUCTION	24	0.333526	0.989851	0.481876	0.633752	1	2615	tags=25%, list=13%, signal=29%
GOBP_ORGAN_INDUCTION	24	0.328272	0.989665	0.478166	0.633822	1	21	tags=4%, list=0%, signal=4%
GOBP_GLIAL_CELL_PROLIFERATION	39	0.289093	0.989294	0.455319	0.634428	1	3568	tags=33%, list=18%, signal=41%
GOBP_ENTRAINMENT_OF_CIRCADIAN_CLOCK	31	0.308344	0.989	0.465217	0.634798	1	3785	tags=35%, list=20%, signal=44%
GOBP_SPECIFICATION_OF_SYMMETRY	126	0.241397	0.988931	0.447115	0.634571	1	2603	tags=19%, list=13%, signal=22%
GOBP_HISTONE_H2A_UBIQUITINATION	23	0.329689	0.988914	0.470213	0.634215	1	1749	tags=26%, list=9%, signal=29%
GOBP_RESPONSE_TO_ISCHEMIA	50	0.273009	0.988684	0.461874	0.634394	1	3763	tags=34%, list=19%, signal=42%
GOBP_MALE_GENITALIA_DEVELOPMENT	24	0.326869	0.988421	0.456103	0.634681	1	4197	tags=25%, list=22%, signal=32%
GOBP_SENSORY_PERCEPTION_OF_TEMPERATURE_STIMULUS	26	0.328665	0.986733	0.449275	0.638664	1	4979	tags=42%, list=26%, signal=57%
GOBP_CARDIOBLAST_DIFFERENTIATION	17	0.366828	0.986278	0.466135	0.639421	1	5442	tags=59%, list=28%, signal=82%
GOBP_SKELETAL_MUSCLE_ORGAN_DEVELOPMENT	156	0.225772	0.986136	0.497462	0.639364	1	3622	tags=25%, list=19%, signal=30%
GOBP_RESPONSE_TO_MINERALOCORTICOID	31	0.309004	0.985747	0.459227	0.639985	1	1298	tags=16%, list=7%, signal=17%
GOBP_REGULATION_OF_OSSIFICATION	108	0.243205	0.985108	0.473418	0.641268	1	4295	tags=26%, list=22%, signal=33%
GOBP_GAS_TRANSPORT	18	0.345333	0.984978	0.47541	0.641195	1	13	tags=6%, list=0%, signal=6%
GOBP_MANGANESE_ION_TRANSPORT	16	0.351838	0.984638	0.511202	0.64165	1	1165	tags=19%, list=6%, signal=20%
GOBP_BENZENE_CONTAINING_COMPOUND_METABOLIC_PROCESS	24	0.325703	0.983936	0.450902	0.643093	1	3629	tags=29%, list=19%, signal=36%
GOBP_REGULATION_OF_HETEROTYPIC_CELL_CELL_ADHESION	25	0.324395	0.983781	0.444915	0.64306	1	1056	tags=20%, list=5%, signal=21%
GOBP_SMOOTH_MUSCLE_TISSUE_DEVELOPMENT	21	0.340508	0.983683	0.476483	0.642943	1	2108	tags=24%, list=11%, signal=27%
GOBP_POSITIVE_REGULATION_OF_PROTEIN_DEACETYLATION	27	0.317905	0.983607	0.465066	0.642747	1	2764	tags=33%, list=14%, signal=39%
GOBP_PHOSPHATIDYLINOSITOL_BIOSYNTHETIC_PROCESS	123	0.232793	0.983097	0.502591	0.643667	1	5064	tags=32%, list=26%, signal=43%
GOBP_ALCOHOL_BIOSYNTHETIC_PROCESS	132	0.229858	0.982629	0.492462	0.64453	1	2866	tags=18%, list=15%, signal=21%
GOBP_CELLULAR_LIPID_CATABOLIC_PROCESS	208	0.215703	0.982511	0.49734	0.644443	1	2806	tags=18%, list=14%, signal=21%
GOBP_REGULATION_OF_JUN_KINASE_ACTIVITY	56	0.268697	0.98237	0.450116	0.644383	1	4212	tags=32%, list=22%, signal=41%
GOBP_DEVELOPMENT_OF_PRIMARY_FEMALE_SEXUAL_CHARACTERISTICS	106	0.240918	0.982181	0.468514	0.644472	1	4853	tags=35%, list=25%, signal=46%
GOBP_MONOSACCHARIDE_BIOSYNTHETIC_PROCESS	78	0.253455	0.982091	0.487119	0.644292	1	3666	tags=27%, list=19%, signal=33%
GOBP_NEGATIVE_REGULATION_OF_PLASMA_MEMBRANE_BOUNDED_CELL_PROJECTION_ASSEMBLY	32	0.305277	0.981688	0.486141	0.644955	1	6611	tags=63%, list=34%, signal=95%
GOBP_PHENOL_CONTAINING_COMPOUND_METABOLIC_PROCESS	104	0.240925	0.981103	0.497573	0.64601	1	3355	tags=21%, list=17%, signal=25%
GOBP_REGULATION_OF_RENAL_SYSTEM_PROCESS	33	0.297789	0.981048	0.49569	0.64574	1	938	tags=9%, list=5%, signal=10%
GOBP_LONG_CHAIN_FATTY_ACID_METABOLIC_PROCESS	103	0.240062	0.981032	0.5	0.645378	1	3935	tags=23%, list=20%, signal=29%
GOBP_NEURON_PROJECTION_REGENERATION	54	0.275439	0.981006	0.502294	0.645043	1	3404	tags=28%, list=18%, signal=34%
GOBP_ORGANIC_HYDROXY_COMPOUND_TRANSPORT	253	0.212821	0.980736	0.518841	0.645323	1	2372	tags=15%, list=12%, signal=16%
GOBP_NUCLEOTIDE_SUGAR_BIOSYNTHETIC_PROCESS	15	0.368705	0.980606	0.487755	0.645255	1	1602	tags=20%, list=8%, signal=22%
GOBP_CELLULAR_RESPONSE_TO_STEROL_DEPLETION	15	0.370463	0.98021	0.507187	0.645904	1	2301	tags=27%, list=12%, signal=30%
GOBP_MYELOID_CELL_ACTIVATION_INVOLVED_IN_IMMUNE_RESPONSE	91	0.241151	0.97898	0.519608	0.648628	1	2689	tags=18%, list=14%, signal=20%
GOBP_RESPONSE_TO_INCREASED_OXYGEN_LEVELS	24	0.328628	0.978014	0.465263	0.650636	1	4345	tags=38%, list=22%, signal=48%
GOBP_NEGATIVE_REGULATION_OF_PEPTIDYL_THREONINE_PHOSPHORYLATION	17	0.359563	0.976859	0.480249	0.653133	1	2107	tags=24%, list=11%, signal=26%
GOBP_NEGATIVE_REGULATION_OF_MRNA_PROCESSING	26	0.314147	0.975746	0.480263	0.655553	1	5619	tags=46%, list=29%, signal=65%
GOBP_REGULATION_OF_DNA_DAMAGE_RESPONSE_SIGNAL_TRANSDUCTION_BY_P53_CLASS_MEDIATOR	33	0.297307	0.975653	0.481236	0.655387	1	2778	tags=24%, list=14%, signal=28%
GOBP_POSITIVE_REGULATION_OF_HEMOPOIESIS	153	0.226135	0.97516	0.522248	0.656275	1	2997	tags=18%, list=15%, signal=21%
GOBP_REGULATION_OF_MEMBRANE_LIPID_DISTRIBUTION	58	0.265381	0.974737	0.502359	0.65697	1	2147	tags=17%, list=11%, signal=19%
GOBP_REGULATION_OF_RESPIRATORY_GASEOUS_EXCHANGE	20	0.334767	0.973969	0.496881	0.658536	1	2898	tags=25%, list=15%, signal=29%
GOBP_POSITIVE_REGULATION_OF_ANION_TRANSPORT	48	0.273574	0.973494	0.508516	0.659374	1	2418	tags=21%, list=12%, signal=24%
GOBP_RESPONSE_TO_INTERLEUKIN_6	37	0.300031	0.973471	0.505774	0.659027	1	2090	tags=22%, list=11%, signal=24%
GOBP_STRIATED_MUSCLE_CELL_PROLIFERATION	58	0.265717	0.973335	0.478261	0.658957	1	5845	tags=48%, list=30%, signal=69%
GOBP_POST_ANAL_TAIL_MORPHOGENESIS	17	0.349612	0.973111	0.484211	0.659135	1	4985	tags=47%, list=26%, signal=63%
GOBP_DETECTION_OF_TEMPERATURE_STIMULUS	24	0.323277	0.972213	0.517544	0.660988	1	4883	tags=38%, list=25%, signal=50%
GOBP_POSITIVE_REGULATION_OF_MUSCLE_HYPERTROPHY	25	0.322629	0.971921	0.501085	0.661316	1	868	tags=16%, list=4%, signal=17%
GOBP_NEUTROPHIL_MEDIATED_IMMUNITY	37	0.289903	0.971652	0.496599	0.661602	1	2938	tags=24%, list=15%, signal=29%
GOBP_CELL_CELL_ADHESION_MEDIATED_BY_CADHERIN	26	0.312302	0.971339	0.501171	0.662043	1	3259	tags=23%, list=17%, signal=28%
GOBP_REGULATION_OF_BLOOD_PRESSURE	177	0.220866	0.970847	0.532258	0.662894	1	3207	tags=19%, list=17%, signal=23%
GOBP_POSITIVE_REGULATION_OF_TELOMERE_MAINTENANCE	44	0.28088	0.970767	0.530892	0.662701	1	5740	tags=45%, list=30%, signal=64%
GOBP_TORC1_SIGNALING	39	0.287119	0.970135	0.488839	0.663907	1	1560	tags=15%, list=8%, signal=17%
GOBP_T_CELL_CHEMOTAXIS	25	0.319202	0.969766	0.493119	0.66446	1	913	tags=16%, list=5%, signal=17%
GOBP_POST_EMBRYONIC_DEVELOPMENT	80	0.248204	0.969637	0.522145	0.664362	1	4960	tags=35%, list=26%, signal=47%
GOBP_REGULATION_OF_MEMBRANE_REPOLARIZATION	32	0.298793	0.96891	0.487448	0.665853	1	2335	tags=22%, list=12%, signal=25%
GOBP_MULTICELLULAR_ORGANISMAL_SIGNALING	153	0.223389	0.968793	0.527228	0.665748	1	3055	tags=20%, list=16%, signal=23%
GOBP_POSITIVE_REGULATION_OF_MORPHOGENESIS_OF_AN_EPITHELIUM	36	0.291935	0.968623	0.498915	0.665764	1	1157	tags=14%, list=6%, signal=15%
GOBP_METENCEPHALON_DEVELOPMENT	101	0.240102	0.968395	0.506944	0.665918	1	1775	tags=15%, list=9%, signal=16%
GOBP_HEART_VALVE_MORPHOGENESIS	53	0.267541	0.968167	0.515487	0.666114	1	4292	tags=32%, list=22%, signal=41%
GOBP_CORTICOSTEROID_HORMONE_SECRETION	16	0.36071	0.967981	0.510288	0.666195	1	1658	tags=19%, list=9%, signal=20%
GOBP_REGULATION_OF_INTEGRIN_ACTIVATION	17	0.353617	0.967222	0.509636	0.667709	1	3098	tags=35%, list=16%, signal=42%
GOBP_VENTRAL_SPINAL_CORD_DEVELOPMENT	46	0.27394	0.967116	0.537946	0.667578	1	2861	tags=17%, list=15%, signal=20%
GOBP_REGULATION_OF_DENDRITE_MORPHOGENESIS	60	0.255696	0.966607	0.512529	0.668491	1	3325	tags=25%, list=17%, signal=30%
GOBP_REGULATION_OF_MITOCHONDRIAL_OUTER_MEMBRANE_PERMEABILIZATION_INVOLVED_IN_APOPTOTIC_SIGNALING_PATHWAY	18	0.343022	0.966414	0.518828	0.668571	1	6807	tags=72%, list=35%, signal=111%
GOBP_REGULATION_OF_SYNCYTIUM_FORMATION_BY_PLASMA_MEMBRANE_FUSION	28	0.306901	0.966326	0.505376	0.668398	1	1587	tags=14%, list=8%, signal=16%
GOBP_ANATOMICAL_STRUCTURE_ARRANGEMENT	17	0.34916	0.96627	0.50503	0.668157	1	3	tags=6%, list=0%, signal=6%
GOBP_NEGATIVE_REGULATION_OF_POTASSIUM_ION_TRANSPORT	28	0.313599	0.965054	0.504525	0.670819	1	2329	tags=21%, list=12%, signal=24%
GOBP_NEGATIVE_REGULATION_OF_POTASSIUM_ION_TRANSMEMBRANE_TRANSPORT	21	0.328007	0.964989	0.511161	0.670596	1	2329	tags=24%, list=12%, signal=27%
GOBP_WHITE_FAT_CELL_DIFFERENTIATION	15	0.351494	0.963695	0.516878	0.673531	1	3734	tags=40%, list=19%, signal=49%
GOBP_LYMPHOCYTE_COSTIMULATION	44	0.275686	0.963645	0.51236	0.673229	1	4580	tags=43%, list=24%, signal=56%
GOBP_CALCIUM_ION_TRANSMEMBRANE_TRANSPORT	282	0.205476	0.963285	0.609756	0.673735	1	3173	tags=17%, list=16%, signal=20%
GOBP_REGULATION_OF_CALCIUM_ION_TRANSMEMBRANE_TRANSPORT	136	0.226197	0.963136	0.518797	0.67369	1	3658	tags=23%, list=19%, signal=28%
GOBP_KIDNEY_MORPHOGENESIS	90	0.243279	0.963124	0.514151	0.673318	1	2166	tags=16%, list=11%, signal=17%
GOBP_REGULATION_OF_OLIGODENDROCYTE_DIFFERENTIATION	39	0.282027	0.962177	0.522222	0.675346	1	6513	tags=49%, list=34%, signal=73%
GOBP_RUFFLE_ASSEMBLY	41	0.280841	0.961941	0.527383	0.675539	1	1288	tags=17%, list=7%, signal=18%
GOBP_POSITIVE_REGULATION_OF_MONOOXYGENASE_ACTIVITY	29	0.303459	0.961782	0.516279	0.675553	1	2002	tags=21%, list=10%, signal=23%
GOBP_PHAGOCYTOSIS	219	0.210058	0.961047	0.534954	0.676965	1	1581	tags=11%, list=8%, signal=12%
GOBP_POSITIVE_REGULATION_OF_STRIATED_MUSCLE_CELL_DIFFERENTIATION	43	0.281362	0.96064	0.546911	0.677592	1	1763	tags=14%, list=9%, signal=15%
GOBP_POSITIVE_REGULATION_OF_PROTEIN_MATURATION	26	0.316512	0.960448	0.505495	0.677697	1	1629	tags=19%, list=8%, signal=21%
GOBP_CARBOHYDRATE_BIOSYNTHETIC_PROCESS	196	0.214522	0.960302	0.603217	0.677671	1	3236	tags=20%, list=17%, signal=24%
GOBP_RESPONSE_TO_STEROL_DEPLETION	16	0.352884	0.9597	0.528302	0.678796	1	3093	tags=31%, list=16%, signal=37%
GOBP_PHOTORECEPTOR_CELL_DIFFERENTIATION	57	0.258344	0.95957	0.52017	0.678713	1	2553	tags=18%, list=13%, signal=20%
GOBP_NEGATIVE_REGULATION_OF_LIPID_LOCALIZATION	43	0.271338	0.959522	0.538793	0.678431	1	2131	tags=19%, list=11%, signal=21%
GOBP_NEGATIVE_REGULATION_OF_AMYLOID_PRECURSOR_PROTEIN_CATABOLIC_PROCESS	20	0.331196	0.958484	0.504049	0.680774	1	3210	tags=25%, list=17%, signal=30%
GOBP_APOPTOTIC_PROCESS_INVOLVED_IN_DEVELOPMENT	38	0.286154	0.958321	0.523595	0.680793	1	3277	tags=21%, list=17%, signal=25%
GOBP_NEGATIVE_REGULATION_OF_TELOMERE_MAINTENANCE_VIA_TELOMERE_LENGTHENING	21	0.329103	0.957118	0.510112	0.68353	1	4761	tags=38%, list=25%, signal=50%
GOBP_SEROTONIN_RECEPTOR_SIGNALING_PATHWAY	39	0.279337	0.956832	0.520833	0.683841	1	4636	tags=31%, list=24%, signal=40%
GOBP_REGULATION_OF_HISTONE_DEACETYLATION	40	0.281401	0.956813	0.539823	0.683485	1	2301	tags=25%, list=12%, signal=28%
GOBP_REGULATION_OF_HUMORAL_IMMUNE_RESPONSE	41	0.27941	0.956776	0.53277	0.683184	1	3270	tags=27%, list=17%, signal=32%
GOBP_RETROGRADE_AXONAL_TRANSPORT	20	0.332659	0.956753	0.533049	0.682838	1	1534	tags=15%, list=8%, signal=16%
GOBP_REGULATION_OF_PHOSPHOLIPID_METABOLIC_PROCESS	32	0.289973	0.956405	0.522565	0.683315	1	4571	tags=34%, list=24%, signal=45%
GOBP_HEMATOPOIETIC_PROGENITOR_CELL_DIFFERENTIATION	114	0.231516	0.95596	0.584615	0.684066	1	4946	tags=32%, list=25%, signal=43%
GOBP_EPITHELIAL_CELL_DIFFERENTIATION_INVOLVED_IN_KIDNEY_DEVELOPMENT	47	0.272911	0.95561	0.551648	0.684556	1	4259	tags=38%, list=22%, signal=49%
GOBP_MITOCHONDRIAL_ELECTRON_TRANSPORT_NADH_TO_UBIQUINONE	39	0.280103	0.955176	0.549107	0.685211	1	6179	tags=44%, list=32%, signal=64%
GOBP_POSITIVE_REGULATION_OF_STEM_CELL_DIFFERENTIATION	17	0.354551	0.954877	0.526998	0.685586	1	1722	tags=18%, list=9%, signal=19%
GOBP_ESTABLISHMENT_OF_PROTEIN_LOCALIZATION_TO_CHROMOSOME	20	0.331048	0.954416	0.511727	0.686336	1	6184	tags=55%, list=32%, signal=81%
GOBP_PROTEIN_TETRAMERIZATION	86	0.243218	0.95404	0.559113	0.686869	1	2747	tags=21%, list=14%, signal=24%
GOBP_NADPH_REGENERATION	16	0.342791	0.953961	0.493042	0.686669	1	3567	tags=44%, list=18%, signal=54%
GOBP_REGULATION_OF_HISTONE_H3_K9_METHYLATION	23	0.320797	0.953321	0.520518	0.68788	1	4507	tags=52%, list=23%, signal=68%
GOBP_GLYCEROL_ETHER_METABOLIC_PROCESS	19	0.33594	0.95219	0.531872	0.690317	1	1762	tags=21%, list=9%, signal=23%
GOBP_CHONDROITIN_SULFATE_BIOSYNTHETIC_PROCESS	17	0.346053	0.951874	0.530992	0.690674	1	891	tags=12%, list=5%, signal=12%
GOBP_RESPIRATORY_BURST	30	0.298575	0.951755	0.528138	0.690548	1	1499	tags=20%, list=8%, signal=22%
GOBP_EMBRYONIC_PLACENTA_DEVELOPMENT	84	0.239412	0.95097	0.558473	0.692119	1	3641	tags=29%, list=19%, signal=35%
GOBP_HEMOGLOBIN_METABOLIC_PROCESS	17	0.34744	0.950545	0.531513	0.692808	1	2796	tags=29%, list=14%, signal=34%
GOBP_THIOESTER_BIOSYNTHETIC_PROCESS	40	0.278113	0.950479	0.530435	0.692559	1	3346	tags=33%, list=17%, signal=39%
GOBP_MICROVILLUS_ORGANIZATION	29	0.302989	0.9502	0.506173	0.69289	1	2504	tags=28%, list=13%, signal=32%
GOBP_POSITIVE_REGULATION_OF_MESENCHYMAL_CELL_PROLIFERATION	23	0.317665	0.949856	0.528302	0.693354	1	1632	tags=17%, list=8%, signal=19%
GOBP_CELL_SURFACE_RECEPTOR_SIGNALING_PATHWAY_INVOLVED_IN_HEART_DEVELOPMENT	30	0.297672	0.949485	0.524229	0.693875	1	143	tags=7%, list=1%, signal=7%
GOBP_NEPHRON_DEVELOPMENT	142	0.222803	0.949427	0.589474	0.693607	1	4127	tags=25%, list=21%, signal=32%
GOBP_MICROTUBULE_ANCHORING	25	0.313898	0.949425	0.54013	0.693204	1	3561	tags=24%, list=18%, signal=29%
GOBP_MUSCLE_HYPERTROPHY	75	0.24974	0.94824	0.56338	0.695803	1	3904	tags=28%, list=20%, signal=35%
GOBP_AMYLOID_FIBRIL_FORMATION	26	0.311008	0.947866	0.532609	0.696354	1	3620	tags=27%, list=19%, signal=33%
GOBP_REGULATION_OF_CELLULAR_RESPONSE_TO_VASCULAR_ENDOTHELIAL_GROWTH_FACTOR_STIMULUS	22	0.314111	0.947741	0.508163	0.696276	1	4168	tags=41%, list=21%, signal=52%
GOBP_REGULATION_OF_GLUCAN_BIOSYNTHETIC_PROCESS	25	0.302721	0.94716	0.561822	0.697315	1	3236	tags=28%, list=17%, signal=34%
GOBP_VASCULAR_ASSOCIATED_SMOOTH_MUSCLE_CELL_MIGRATION	21	0.32018	0.946879	0.523139	0.697584	1	2490	tags=24%, list=13%, signal=27%
GOBP_REGULATION_OF_EXTRACELLULAR_MATRIX_ORGANIZATION	41	0.274332	0.946512	0.524362	0.698122	1	2346	tags=20%, list=12%, signal=22%
GOBP_POSITIVE_REGULATION_OF_CELL_CELL_ADHESION	273	0.204136	0.945955	0.633803	0.699133	1	3277	tags=20%, list=17%, signal=23%
GOBP_POSITIVE_REGULATION_OF_BLOOD_VESSEL_ENDOTHELIAL_CELL_MIGRATION	49	0.264055	0.945808	0.548807	0.699121	1	2002	tags=20%, list=10%, signal=23%
GOBP_REGULATION_OF_SYNAPTIC_VESICLE_EXOCYTOSIS	53	0.264186	0.945464	0.550885	0.699575	1	3027	tags=17%, list=16%, signal=20%
GOBP_REGULATION_OF_LIPOPROTEIN_PARTICLE_CLEARANCE	16	0.346981	0.945346	0.526998	0.699445	1	1596	tags=19%, list=8%, signal=20%
GOBP_POSITIVE_REGULATION_OF_PEPTIDE_SECRETION	90	0.23744	0.944159	0.580952	0.702007	1	2502	tags=20%, list=13%, signal=23%
GOBP_PROTEIN_LOCALIZATION_TO_CHROMOSOME_TELOMERIC_REGION	25	0.304401	0.942023	0.549407	0.707013	1	6184	tags=48%, list=32%, signal=70%
GOBP_REGULATION_OF_HEMATOPOIETIC_PROGENITOR_CELL_DIFFERENTIATION	34	0.285154	0.941708	0.549569	0.707407	1	5247	tags=41%, list=27%, signal=56%
GOBP_PHENOL_CONTAINING_COMPOUND_BIOSYNTHETIC_PROCESS	45	0.268378	0.941619	0.590909	0.707221	1	2877	tags=18%, list=15%, signal=21%
GOBP_L_GLUTAMATE_IMPORT_ACROSS_PLASMA_MEMBRANE	16	0.346018	0.941563	0.53617	0.706957	1	2774	tags=25%, list=14%, signal=29%
GOBP_ENDOCARDIAL_CUSHION_DEVELOPMENT	48	0.267923	0.941537	0.54023	0.70661	1	2346	tags=17%, list=12%, signal=19%
GOBP_REGULATION_OF_ENDOTHELIAL_CELL_DIFFERENTIATION	35	0.283407	0.941508	0.547826	0.706277	1	841	tags=14%, list=4%, signal=15%
GOBP_NEGATIVE_REGULATION_OF_LIPID_TRANSPORT	26	0.30269	0.941411	0.549234	0.706109	1	4295	tags=31%, list=22%, signal=39%
GOBP_REGULATION_OF_OSTEOBLAST_PROLIFERATION	24	0.310044	0.940097	0.512295	0.708889	1	445	tags=13%, list=2%, signal=13%
GOBP_POSITIVE_REGULATION_OF_ENDOTHELIAL_CELL_APOPTOTIC_PROCESS	16	0.339409	0.939005	0.529897	0.711203	1	2171	tags=25%, list=11%, signal=28%
GOBP_PROTEIN_AUTOPROCESSING	25	0.313542	0.938846	0.564835	0.711194	1	554	tags=12%, list=3%, signal=12%
GOBP_ORGANOPHOSPHATE_ESTER_TRANSPORT	135	0.218602	0.93845	0.6	0.711762	1	3102	tags=21%, list=16%, signal=25%
GOBP_ESTABLISHMENT_OF_PROTEIN_LOCALIZATION_TO_MITOCHONDRIAL_MEMBRANE	26	0.304903	0.938245	0.537975	0.711834	1	2420	tags=27%, list=12%, signal=31%
GOBP_SMOOTH_MUSCLE_CELL_MIGRATION	64	0.252043	0.93785	0.589569	0.712387	1	1632	tags=14%, list=8%, signal=15%
GOBP_REGULATION_OF_LYMPHOCYTE_DIFFERENTIATION	173	0.211609	0.937765	0.621302	0.712194	1	3003	tags=20%, list=15%, signal=24%
GOBP_CARDIAC_MUSCLE_TISSUE_MORPHOGENESIS	57	0.257548	0.937648	0.575621	0.712071	1	6282	tags=44%, list=32%, signal=65%
GOBP_FOREBRAIN_CELL_MIGRATION	57	0.254418	0.937397	0.580499	0.712279	1	5770	tags=39%, list=30%, signal=55%
GOBP_EXCITATORY_SYNAPSE_ASSEMBLY	25	0.308068	0.937106	0.565121	0.712626	1	1880	tags=24%, list=10%, signal=27%
GOBP_INCLUSION_BODY_ASSEMBLY	20	0.329649	0.936645	0.548193	0.713324	1	4002	tags=40%, list=21%, signal=50%
GOBP_PSEUDOPODIUM_ORGANIZATION	15	0.345502	0.936592	0.54326	0.713059	1	5342	tags=53%, list=28%, signal=74%
GOBP_VENTRICULAR_SEPTUM_MORPHOGENESIS	38	0.279093	0.935777	0.553333	0.714633	1	3641	tags=26%, list=19%, signal=32%
GOBP_REGULATION_OF_ESTABLISHMENT_OF_PROTEIN_LOCALIZATION_TO_MITOCHONDRION	45	0.266646	0.93569	0.579832	0.714417	1	2590	tags=20%, list=13%, signal=23%
GOBP_VIRAL_RNA_GENOME_REPLICATION	31	0.286806	0.935609	0.559735	0.714205	1	2959	tags=29%, list=15%, signal=34%
GOBP_FLUID_TRANSPORT	31	0.294713	0.93523	0.555799	0.71475	1	55	tags=6%, list=0%, signal=6%
GOBP_NUCLEOSIDE_MONOPHOSPHATE_CATABOLIC_PROCESS	17	0.334613	0.934438	0.545455	0.716305	1	1137	tags=18%, list=6%, signal=19%
GOBP_PROTEIN_TARGETING_TO_PEROXISOME	17	0.341699	0.934306	0.556263	0.716229	1	3938	tags=35%, list=20%, signal=44%
GOBP_NEGATIVE_REGULATION_OF_MUSCLE_CONTRACTION	20	0.320665	0.934285	0.559252	0.715861	1	2973	tags=35%, list=15%, signal=41%
GOBP_GLYCEROPHOSPHOLIPID_METABOLIC_PROCESS	276	0.198229	0.933957	0.688047	0.716264	1	5064	tags=30%, list=26%, signal=41%
GOBP_AEROBIC_RESPIRATION	148	0.213294	0.932372	0.660428	0.7198	1	5567	tags=36%, list=29%, signal=51%
GOBP_NADP_METABOLIC_PROCESS	35	0.281519	0.932229	0.566596	0.71975	1	3948	tags=31%, list=20%, signal=39%
GOBP_MONOCARBOXYLIC_ACID_BIOSYNTHETIC_PROCESS	195	0.20773	0.931663	0.659631	0.72075	1	3189	tags=20%, list=16%, signal=24%
GOBP_NEGATIVE_REGULATION_OF_STRIATED_MUSCLE_CELL_APOPTOTIC_PROCESS	21	0.322891	0.931613	0.546638	0.720464	1	666	tags=14%, list=3%, signal=15%
GOBP_HIPPOCAMPUS_DEVELOPMENT	77	0.242368	0.931452	0.592075	0.720431	1	4409	tags=29%, list=23%, signal=37%
GOBP_POSITIVE_REGULATION_OF_FOCAL_ADHESION_ASSEMBLY	25	0.308507	0.931348	0.573951	0.720263	1	3602	tags=44%, list=19%, signal=54%
GOBP_CELL_ACTIVATION_INVOLVED_IN_IMMUNE_RESPONSE	269	0.199584	0.931183	0.699088	0.720232	1	2782	tags=16%, list=14%, signal=19%
GOBP_RESPONSE_TO_AUDITORY_STIMULUS	26	0.298438	0.931138	0.572727	0.719927	1	2108	tags=15%, list=11%, signal=17%
GOBP_FEEDING_BEHAVIOR	105	0.226812	0.930807	0.609453	0.72031	1	3207	tags=19%, list=17%, signal=23%
GOBP_THYROID_HORMONE_METABOLIC_PROCESS	27	0.301182	0.9307	0.537778	0.720159	1	5756	tags=41%, list=30%, signal=58%
GOBP_METAL_ION_EXPORT	48	0.262963	0.930399	0.568396	0.720501	1	4957	tags=35%, list=26%, signal=47%
GOBP_POSITIVE_REGULATION_OF_INTRINSIC_APOPTOTIC_SIGNALING_PATHWAY	49	0.263037	0.928659	0.592437	0.724386	1	2887	tags=24%, list=15%, signal=29%
GOBP_POSITIVE_REGULATION_OF_SMAD_PROTEIN_SIGNAL_TRANSDUCTION	18	0.337583	0.92803	0.54371	0.725523	1	697	tags=17%, list=4%, signal=17%
GOBP_RIBONUCLEOPROTEIN_COMPLEX_BIOGENESIS	363	0.193816	0.927652	0.763848	0.726042	1	4893	tags=27%, list=25%, signal=36%
GOBP_MODULATION_BY_HOST_OF_SYMBIONT_PROCESS	56	0.258245	0.927616	0.602709	0.725711	1	3082	tags=25%, list=16%, signal=30%
GOBP_POSITIVE_REGULATION_OF_CHROMOSOME_ORGANIZATION	78	0.236243	0.927612	0.600907	0.725302	1	3158	tags=26%, list=16%, signal=31%
GOBP_BILE_ACID_BIOSYNTHETIC_PROCESS	34	0.283228	0.927578	0.571759	0.724987	1	5324	tags=38%, list=27%, signal=53%
GOBP_FATTY_ACID_DERIVATIVE_CATABOLIC_PROCESS	17	0.336673	0.925894	0.579918	0.728777	1	3189	tags=41%, list=16%, signal=49%
GOBP_POSITIVE_REGULATION_OF_HORMONE_SECRETION	119	0.221516	0.925855	0.618037	0.728463	1	4295	tags=29%, list=22%, signal=36%
GOBP_DENDRITIC_SPINE_MORPHOGENESIS	53	0.25688	0.925814	0.582938	0.728161	1	3636	tags=26%, list=19%, signal=32%
GOBP_CEREBRAL_CORTEX_DEVELOPMENT	99	0.227233	0.9258	0.638554	0.727786	1	4430	tags=29%, list=23%, signal=38%
GOBP_DOPAMINE_METABOLIC_PROCESS	35	0.277947	0.925782	0.592902	0.72741	1	986	tags=9%, list=5%, signal=9%
GOBP_POSTSYNAPSE_ORGANIZATION	148	0.213847	0.925636	0.640884	0.72734	1	3391	tags=20%, list=17%, signal=24%
GOBP_ALCOHOL_CATABOLIC_PROCESS	51	0.258767	0.925433	0.6	0.727438	1	1321	tags=14%, list=7%, signal=15%
GOBP_NEGATIVE_REGULATION_OF_RECEPTOR_MEDIATED_ENDOCYTOSIS	31	0.290116	0.92518	0.577002	0.727639	1	1411	tags=16%, list=7%, signal=17%
GOBP_LIPOPROTEIN_CATABOLIC_PROCESS	15	0.351098	0.925161	0.557851	0.727275	1	3644	tags=27%, list=19%, signal=33%
GOBP_IRON_ION_TRANSPORT	54	0.253792	0.924732	0.606818	0.727935	1	2931	tags=22%, list=15%, signal=26%
GOBP_LIPID_CATABOLIC_PROCESS	307	0.196014	0.924717	0.754717	0.727557	1	4473	tags=25%, list=23%, signal=32%
GOBP_REFLEX	19	0.327268	0.923793	0.549654	0.7294	1	352	tags=11%, list=2%, signal=11%
GOBP_RETINA_VASCULATURE_DEVELOPMENT_IN_CAMERA_TYPE_EYE	19	0.318312	0.923636	0.574324	0.729344	1	4172	tags=47%, list=21%, signal=60%
GOBP_RESPONSE_TO_PLATELET_DERIVED_GROWTH_FACTOR	21	0.320246	0.923114	0.566532	0.73019	1	1872	tags=24%, list=10%, signal=26%
GOBP_ESTABLISHMENT_OF_PROTEIN_LOCALIZATION_TO_VACUOLE	45	0.262981	0.922163	0.586667	0.732055	1	5736	tags=40%, list=30%, signal=57%
GOBP_ANIMAL_ORGAN_FORMATION	64	0.247047	0.921989	0.595937	0.732072	1	1381	tags=11%, list=7%, signal=12%
GOBP_POSITIVE_REGULATION_OF_OLIGODENDROCYTE_DIFFERENTIATION	21	0.317892	0.921874	0.564655	0.731945	1	798	tags=10%, list=4%, signal=10%
GOBP_AORTIC_VALVE_MORPHOGENESIS	32	0.28436	0.921228	0.570455	0.733113	1	4283	tags=31%, list=22%, signal=40%
GOBP_DEVELOPMENTAL_PIGMENTATION	46	0.266856	0.921186	0.575758	0.732803	1	2853	tags=20%, list=15%, signal=23%
GOBP_REGULATION_OF_TRANSCRIPTION_INVOLVED_IN_G1_S_TRANSITION_OF_MITOTIC_CELL_CYCLE	20	0.323295	0.920838	0.589178	0.733235	1	1898	tags=15%, list=10%, signal=17%
GOBP_REGULATION_OF_HEART_RATE	98	0.228579	0.920726	0.6	0.733109	1	2107	tags=15%, list=11%, signal=17%
GOBP_BEHAVIORAL_RESPONSE_TO_PAIN	16	0.346121	0.920435	0.577167	0.733384	1	3597	tags=31%, list=19%, signal=38%
GOBP_CELL_FATE_DETERMINATION	42	0.26929	0.920006	0.573086	0.733996	1	4072	tags=21%, list=21%, signal=27%
GOBP_NCRNA_PROCESSING	332	0.19423	0.919053	0.746914	0.735795	1	4859	tags=26%, list=25%, signal=34%
GOBP_REGULATION_OF_COMPLEMENT_ACTIVATION	18	0.328649	0.918332	0.580972	0.737085	1	3078	tags=28%, list=16%, signal=33%
GOBP_PEROXISOMAL_TRANSPORT	21	0.312155	0.918027	0.581818	0.737415	1	3938	tags=33%, list=20%, signal=42%
GOBP_POSITIVE_REGULATION_OF_ISOTYPE_SWITCHING	20	0.319055	0.916092	0.592132	0.741456	1	6549	tags=50%, list=34%, signal=75%
GOBP_NEGATIVE_REGULATION_OF_DNA_METABOLIC_PROCESS	92	0.226409	0.915995	0.662763	0.741289	1	2840	tags=23%, list=15%, signal=27%
GOBP_ACTIN_FILAMENT_SEVERING	15	0.34879	0.915875	0.561983	0.741157	1	5616	tags=53%, list=29%, signal=75%
GOBP_CHEMICAL_SYNAPTIC_TRANSMISSION_POSTSYNAPTIC	94	0.225062	0.915818	0.615385	0.740885	1	5732	tags=37%, list=30%, signal=53%
GOBP_MEMORY	117	0.220661	0.915639	0.681373	0.740919	1	2951	tags=16%, list=15%, signal=19%
GOBP_PHAGOSOME_MATURATION	25	0.297547	0.915082	0.592132	0.741824	1	6524	tags=48%, list=34%, signal=72%
GOBP_ANATOMICAL_STRUCTURE_REGRESSION	15	0.341164	0.914818	0.567329	0.742016	1	2867	tags=20%, list=15%, signal=23%
GOBP_CELLULAR_RESPONSE_TO_GLUCOSE_STARVATION	46	0.260925	0.914501	0.629032	0.742386	1	4807	tags=43%, list=25%, signal=58%
GOBP_POSITIVE_REGULATION_OF_NOTCH_SIGNALING_PATHWAY	38	0.271025	0.914369	0.596529	0.74227	1	3679	tags=26%, list=19%, signal=32%
GOBP_BROWN_FAT_CELL_DIFFERENTIATION	46	0.257967	0.914192	0.628959	0.742284	1	3753	tags=37%, list=19%, signal=46%
GOBP_POSITIVE_REGULATION_OF_ACTIN_FILAMENT_BUNDLE_ASSEMBLY	58	0.25091	0.914097	0.636156	0.742093	1	1621	tags=16%, list=8%, signal=17%
GOBP_CAMP_MEDIATED_SIGNALING	48	0.260708	0.913804	0.611842	0.742363	1	1371	tags=15%, list=7%, signal=16%
GOBP_CELLULAR_RESPIRATION	188	0.205315	0.913583	0.720339	0.742447	1	5605	tags=35%, list=29%, signal=49%
GOBP_VITAMIN_TRANSMEMBRANE_TRANSPORT	19	0.322906	0.913109	0.566079	0.743205	1	5060	tags=47%, list=26%, signal=64%
GOBP_POSITIVE_REGULATION_OF_EXTRACELLULAR_MATRIX_ORGANIZATION	23	0.305001	0.913101	0.568034	0.742807	1	798	tags=13%, list=4%, signal=14%
GOBP_CARBOHYDRATE_PHOSPHORYLATION	21	0.313244	0.91281	0.566964	0.743065	1	4502	tags=48%, list=23%, signal=62%
GOBP_HEART_PROCESS	231	0.19713	0.912501	0.741935	0.743395	1	2329	tags=13%, list=12%, signal=15%
GOBP_FIBROBLAST_MIGRATION	43	0.266429	0.91249	0.594714	0.743012	1	4711	tags=40%, list=24%, signal=52%
GOBP_METANEPHRIC_TUBULE_DEVELOPMENT	19	0.324596	0.911809	0.577963	0.74427	1	1157	tags=21%, list=6%, signal=22%
GOBP_MESONEPHROS_DEVELOPMENT	97	0.225365	0.910921	0.649254	0.746002	1	4217	tags=27%, list=22%, signal=34%
GOBP_CARDIAC_MUSCLE_CELL_DIFFERENTIATION	103	0.220031	0.910709	0.674757	0.746092	1	4906	tags=33%, list=25%, signal=44%
GOBP_CELLULAR_SODIUM_ION_HOMEOSTASIS	22	0.307879	0.910661	0.581395	0.745814	1	4796	tags=36%, list=25%, signal=48%
GOBP_LYTIC_VACUOLE_ORGANIZATION	63	0.244305	0.910479	0.643182	0.745863	1	5546	tags=35%, list=29%, signal=49%
GOBP_GASTRIC_ACID_SECRETION	18	0.323791	0.910289	0.575893	0.745942	1	2463	tags=22%, list=13%, signal=25%
GOBP_POSITIVE_REGULATION_OF_CELL_GROWTH	140	0.214317	0.909939	0.671309	0.746326	1	1500	tags=13%, list=8%, signal=14%
GOBP_PYRIMIDINE_CONTAINING_COMPOUND_CATABOLIC_PROCESS	38	0.272015	0.909415	0.604911	0.747189	1	2878	tags=24%, list=15%, signal=28%
GOBP_VASCULAR_ENDOTHELIAL_GROWTH_FACTOR_SIGNALING_PATHWAY	40	0.26486	0.908661	0.602062	0.748567	1	5446	tags=43%, list=28%, signal=59%
GOBP_LOW_DENSITY_LIPOPROTEIN_PARTICLE_REMODELING	16	0.33823	0.908576	0.590385	0.748357	1	4363	tags=31%, list=22%, signal=40%
GOBP_REGULATION_OF_PHAGOCYTOSIS	90	0.22839	0.908404	0.664251	0.748374	1	2240	tags=14%, list=12%, signal=16%
GOBP_REGULATION_OF_SEQUESTERING_OF_TRIGLYCERIDE	15	0.334984	0.908336	0.556641	0.748115	1	2226	tags=20%, list=11%, signal=23%
GOBP_TRANSFORMING_GROWTH_FACTOR_BETA_PRODUCTION	40	0.264479	0.907889	0.61991	0.748734	1	4916	tags=38%, list=25%, signal=50%
GOBP_REGULATION_OF_NEUROBLAST_PROLIFERATION	30	0.281591	0.907594	0.602709	0.74901	1	2382	tags=27%, list=12%, signal=30%
GOBP_POSITIVE_REGULATION_OF_SUBSTRATE_ADHESION_DEPENDENT_CELL_SPREADING	38	0.269656	0.907115	0.621444	0.749697	1	734	tags=13%, list=4%, signal=14%
GOBP_LIPID_TRANSLOCATION	52	0.253799	0.9069	0.627315	0.749803	1	1938	tags=15%, list=10%, signal=17%
GOBP_REGULATION_OF_CIRCADIAN_RHYTHM	114	0.218924	0.905463	0.671717	0.752736	1	2867	tags=18%, list=15%, signal=21%
GOBP_REGULATION_OF_DNA_RECOMBINATION	102	0.223255	0.904987	0.68642	0.753421	1	2519	tags=19%, list=13%, signal=21%
GOBP_MESONEPHRIC_TUBULE_MORPHOGENESIS	63	0.244607	0.904656	0.623913	0.753792	1	2090	tags=14%, list=11%, signal=16%
GOBP_NEGATIVE_REGULATION_OF_MACROAUTOPHAGY	31	0.277966	0.904443	0.610092	0.753871	1	2002	tags=23%, list=10%, signal=25%
GOBP_HEART_VALVE_DEVELOPMENT	61	0.244684	0.903896	0.641791	0.75471	1	4292	tags=30%, list=22%, signal=38%
GOBP_PHOSPHOLIPID_BIOSYNTHETIC_PROCESS	234	0.198789	0.903773	0.748619	0.754579	1	3145	tags=20%, list=16%, signal=23%
GOBP_POSITIVE_REGULATION_OF_BIOMINERALIZATION	50	0.253408	0.903271	0.627803	0.75534	1	4292	tags=24%, list=22%, signal=31%
GOBP_NEURON_FATE_SPECIFICATION	30	0.281782	0.902922	0.591793	0.755787	1	2603	tags=17%, list=13%, signal=19%
GOBP_POSITIVE_REGULATION_OF_PROTEIN_CONTAINING_COMPLEX_DISASSEMBLY	30	0.281529	0.902875	0.636364	0.755487	1	4525	tags=30%, list=23%, signal=39%
GOBP_TELOMERE_CAPPING	35	0.269638	0.902867	0.615054	0.75509	1	3158	tags=31%, list=16%, signal=37%
GOBP_RESPIRATORY_CHAIN_COMPLEX_IV_ASSEMBLY	19	0.316578	0.902803	0.598425	0.754823	1	2420	tags=26%, list=12%, signal=30%
GOBP_PROTEIN_TRANSMEMBRANE_TRANSPORT	59	0.246652	0.902692	0.669082	0.754663	1	4400	tags=36%, list=23%, signal=46%
GOBP_REGULATION_OF_CILIUM_ASSEMBLY	78	0.229445	0.902577	0.630872	0.754514	1	2439	tags=18%, list=13%, signal=20%
GOBP_RRNA_MODIFICATION	30	0.28695	0.901655	0.602083	0.756195	1	4813	tags=33%, list=25%, signal=44%
GOBP_ENDOCARDIAL_CUSHION_MORPHOGENESIS	39	0.267423	0.901454	0.627451	0.756225	1	3928	tags=26%, list=20%, signal=32%
GOBP_POSITIVE_REGULATION_OF_COAGULATION	24	0.29833	0.901206	0.608696	0.756371	1	1180	tags=17%, list=6%, signal=18%
GOBP_MATURATION_OF_5_8S_RRNA	31	0.278377	0.901076	0.632411	0.75627	1	4946	tags=35%, list=25%, signal=48%
GOBP_CYTOPLASMIC_SEQUESTERING_OF_PROTEIN	21	0.317472	0.900632	0.615385	0.756921	1	2603	tags=29%, list=13%, signal=33%
GOBP_NEPHRON_MORPHOGENESIS	75	0.232883	0.900294	0.666667	0.757258	1	2090	tags=15%, list=11%, signal=16%
GOBP_CELL_RECOGNITION	149	0.206539	0.900119	0.723077	0.757265	1	5362	tags=31%, list=28%, signal=42%
GOBP_POSITIVE_REGULATION_OF_EXCITATORY_POSTSYNAPTIC_POTENTIAL	24	0.29503	0.900052	0.604348	0.757009	1	3027	tags=29%, list=16%, signal=35%
GOBP_NCRNA_METABOLIC_PROCESS	442	0.183247	0.899898	0.880702	0.75694	1	5171	tags=28%, list=27%, signal=37%
GOBP_PHOSPHOLIPID_TRANSPORT	93	0.224746	0.899634	0.723404	0.757154	1	3102	tags=20%, list=16%, signal=24%
GOBP_POST_TRANSLATIONAL_PROTEIN_MODIFICATION	39	0.267773	0.89944	0.645233	0.757167	1	1629	tags=15%, list=8%, signal=17%
GOBP_POSITIVE_REGULATION_OF_LEUKOCYTE_CELL_CELL_ADHESION	230	0.198355	0.898901	0.76776	0.757958	1	3270	tags=20%, list=17%, signal=24%
GOBP_REGULATION_OF_CENTRIOLE_REPLICATION	20	0.307155	0.898576	0.608889	0.758246	1	1909	tags=25%, list=10%, signal=28%
GOBP_VENTRICULAR_CARDIAC_MUSCLE_CELL_ACTION_POTENTIAL	31	0.280731	0.898035	0.618605	0.759059	1	2329	tags=26%, list=12%, signal=29%
GOBP_SYNAPSE_MATURATION	24	0.297871	0.897663	0.603239	0.759507	1	4409	tags=46%, list=23%, signal=59%
GOBP_POLYSACCHARIDE_CATABOLIC_PROCESS	16	0.327532	0.897609	0.588727	0.759218	1	557	tags=13%, list=3%, signal=13%
GOBP_CARDIAC_MYOFIBRIL_ASSEMBLY	19	0.315593	0.896716	0.608519	0.760744	1	6171	tags=53%, list=32%, signal=77%
GOBP_CHONDROITIN_SULFATE_PROTEOGLYCAN_BIOSYNTHETIC_PROCESS	22	0.299231	0.896392	0.599572	0.761054	1	891	tags=9%, list=5%, signal=10%
GOBP_SODIUM_ION_IMPORT_ACROSS_PLASMA_MEMBRANE	23	0.302774	0.896351	0.608511	0.760738	1	249	tags=9%, list=1%, signal=9%
GOBP_HISTONE_H3_K9_TRIMETHYLATION	17	0.322911	0.896062	0.597374	0.760982	1	4507	tags=47%, list=23%, signal=61%
GOBP_PIGMENTATION	97	0.221566	0.895856	0.699248	0.761042	1	2853	tags=16%, list=15%, signal=19%
GOBP_STEROID_ESTERIFICATION	16	0.333449	0.89499	0.607803	0.762605	1	2966	tags=25%, list=15%, signal=29%
GOBP_POSITIVE_REGULATION_OF_MRNA_SPLICING_VIA_SPLICEOSOME	19	0.306625	0.894829	0.592827	0.762546	1	2330	tags=16%, list=12%, signal=18%
GOBP_REGULATION_OF_GLYCOGEN_METABOLIC_PROCESS	30	0.280247	0.894775	0.619687	0.762254	1	3546	tags=30%, list=18%, signal=37%
GOBP_SPLICEOSOMAL_SNRNP_ASSEMBLY	35	0.27328	0.893907	0.615551	0.763825	1	3910	tags=26%, list=20%, signal=32%
GOBP_REGULATION_OF_MEMBRANE_PROTEIN_ECTODOMAIN_PROTEOLYSIS	21	0.304248	0.893426	0.620408	0.764521	1	2783	tags=33%, list=14%, signal=39%
GOBP_REGULATION_OF_RECEPTOR_BINDING	21	0.300854	0.892916	0.599138	0.765267	1	218	tags=10%, list=1%, signal=10%
GOBP_POSITIVE_REGULATION_OF_NITRIC_OXIDE_SYNTHASE_ACTIVITY	20	0.307867	0.892818	0.609658	0.76509	1	2002	tags=20%, list=10%, signal=22%
GOBP_WATER_SOLUBLE_VITAMIN_METABOLIC_PROCESS	58	0.24399	0.892514	0.687215	0.765348	1	5060	tags=36%, list=26%, signal=49%
GOBP_PROTEIN_QUALITY_CONTROL_FOR_MISFOLDED_OR_INCOMPLETELY_SYNTHESIZED_PROTEINS	26	0.288993	0.892494	0.631929	0.764982	1	3744	tags=31%, list=19%, signal=38%
GOBP_REGULATION_OF_SYSTEMIC_ARTERIAL_BLOOD_PRESSURE_BY_CIRCULATORY_RENIN_ANGIOTENSIN	16	0.328806	0.892484	0.625	0.764596	1	393	tags=13%, list=2%, signal=13%
GOBP_CELLULAR_RESPONSE_TO_VITAMIN_D	20	0.309577	0.892251	0.631692	0.764707	1	2153	tags=15%, list=11%, signal=17%
GOBP_AUTOPHAGOSOME_MATURATION	54	0.246751	0.892129	0.691943	0.76455	1	5477	tags=37%, list=28%, signal=51%
GOBP_MITOCHONDRION_MORPHOGENESIS	19	0.313964	0.891518	0.613333	0.76543	1	3581	tags=42%, list=18%, signal=52%
GOBP_PURINE_CONTAINING_COMPOUND_BIOSYNTHETIC_PROCESS	154	0.204353	0.890695	0.741772	0.76688	1	3543	tags=23%, list=18%, signal=28%
GOBP_SULFUR_AMINO_ACID_BIOSYNTHETIC_PROCESS	15	0.324552	0.889989	0.612245	0.768003	1	2604	tags=20%, list=13%, signal=23%
GOBP_BONE_CELL_DEVELOPMENT	32	0.282834	0.889599	0.624434	0.768431	1	2891	tags=22%, list=15%, signal=26%
GOBP_RESPONSE_TO_STEROL	29	0.282252	0.889029	0.641469	0.769308	1	954	tags=17%, list=5%, signal=18%
GOBP_SENSORY_PERCEPTION_OF_LIGHT_STIMULUS	210	0.197305	0.888889	0.763889	0.769164	1	3010	tags=13%, list=16%, signal=16%
GOBP_OVULATION_CYCLE	69	0.234505	0.887753	0.673809	0.771244	1	5885	tags=46%, list=30%, signal=66%
GOBP_NEGATIVE_REGULATION_OF_SMOOTH_MUSCLE_CELL_MIGRATION	23	0.298556	0.887386	0.628151	0.771595	1	5320	tags=48%, list=27%, signal=66%
GOBP_CELLULAR_RESPONSE_TO_CAMP	51	0.246086	0.886771	0.67161	0.772544	1	1414	tags=14%, list=7%, signal=15%
GOBP_NEGATIVE_REGULATION_OF_INTRINSIC_APOPTOTIC_SIGNALING_PATHWAY_IN_RESPONSE_TO_DNA_DAMAGE	25	0.28659	0.886486	0.635021	0.77276	1	2940	tags=32%, list=15%, signal=38%
GOBP_REGULATION_OF_DNA_METHYLATION	21	0.303213	0.886221	0.634146	0.77294	1	4340	tags=33%, list=22%, signal=43%
GOBP_NEGATIVE_REGULATION_OF_DEFENSE_RESPONSE_TO_VIRUS	22	0.298613	0.885958	0.633833	0.773133	1	2168	tags=23%, list=11%, signal=26%
GOBP_TRABECULA_FORMATION	24	0.293995	0.885425	0.62766	0.773845	1	3641	tags=38%, list=19%, signal=46%
GOBP_NATURAL_KILLER_CELL_ACTIVATION_INVOLVED_IN_IMMUNE_RESPONSE	31	0.270176	0.884116	0.653192	0.776253	1	2007	tags=16%, list=10%, signal=18%
GOBP_NEGATIVE_REGULATION_OF_HUMORAL_IMMUNE_RESPONSE	15	0.324263	0.884079	0.629555	0.775919	1	3078	tags=33%, list=16%, signal=40%
GOBP_INTEGRIN_ACTIVATION	25	0.286423	0.883757	0.66875	0.776249	1	3393	tags=32%, list=17%, signal=39%
GOBP_REGULATION_OF_INTRINSIC_APOPTOTIC_SIGNALING_PATHWAY_IN_RESPONSE_TO_DNA_DAMAGE	30	0.279941	0.88353	0.648421	0.776311	1	2940	tags=30%, list=15%, signal=35%
GOBP_REGULATION_OF_PROTEIN_DEPOLYMERIZATION	72	0.231505	0.88276	0.734118	0.777582	1	2355	tags=18%, list=12%, signal=20%
GOBP_MEMBRANE_INVAGINATION	67	0.234046	0.882611	0.682984	0.777505	1	1499	tags=13%, list=8%, signal=15%
GOBP_REGULATION_OF_CYTOPLASMIC_TRANSLATION	26	0.286317	0.882094	0.631347	0.778197	1	5785	tags=46%, list=30%, signal=66%
GOBP_ESTABLISHMENT_OF_MITOCHONDRION_LOCALIZATION	28	0.283589	0.88205	0.630928	0.777879	1	2381	tags=21%, list=12%, signal=24%
GOBP_GLUCOSE_IMPORT	68	0.232912	0.880988	0.7	0.779822	1	2590	tags=18%, list=13%, signal=20%
GOBP_VACUOLE_ORGANIZATION	167	0.200107	0.880959	0.814721	0.779474	1	4320	tags=23%, list=22%, signal=30%
GOBP_REGULATION_OF_PLASMA_LIPOPROTEIN_PARTICLE_LEVELS	64	0.237455	0.880946	0.702179	0.779091	1	2280	tags=17%, list=12%, signal=19%
GOBP_REGULATION_OF_SYSTEMIC_ARTERIAL_BLOOD_PRESSURE_BY_HORMONE	38	0.261825	0.880833	0.642384	0.778913	1	393	tags=8%, list=2%, signal=8%
GOBP_PROTEIN_K48_LINKED_DEUBIQUITINATION	30	0.274077	0.879806	0.629139	0.780763	1	760	tags=13%, list=4%, signal=14%
GOBP_NEGATIVE_REGULATION_OF_ORGANELLE_ASSEMBLY	37	0.265872	0.879595	0.636761	0.780793	1	2035	tags=19%, list=10%, signal=21%
GOBP_SEMI_LUNAR_VALVE_DEVELOPMENT	39	0.26227	0.87902	0.654812	0.781613	1	4283	tags=31%, list=22%, signal=39%
GOBP_GLUTAMINE_METABOLIC_PROCESS	24	0.291192	0.878739	0.634409	0.781803	1	4340	tags=38%, list=22%, signal=48%
GOBP_PHOSPHATIDYLINOSITOL_PHOSPHATE_BIOSYNTHETIC_PROCESS	63	0.235938	0.878709	0.690265	0.781453	1	3534	tags=22%, list=18%, signal=27%
GOBP_REGULATION_OF_ORGANIC_ACID_TRANSPORT	67	0.234187	0.877853	0.722772	0.782904	1	2887	tags=22%, list=15%, signal=26%
GOBP_REGULATION_OF_T_CELL_RECEPTOR_SIGNALING_PATHWAY	42	0.253918	0.876995	0.681614	0.784294	1	2622	tags=24%, list=14%, signal=27%
GOBP_NUCLEAR_TRANSCRIBED_MRNA_CATABOLIC_PROCESS_NONSENSE_MEDIATED_DECAY	36	0.266877	0.876528	0.638009	0.784878	1	5406	tags=36%, list=28%, signal=50%
GOBP_POSITIVE_REGULATION_OF_LYMPHOCYTE_CHEMOTAXIS	18	0.30276	0.875689	0.615551	0.786212	1	484	tags=11%, list=2%, signal=11%
GOBP_POSITIVE_REGULATION_OF_ANTIGEN_RECEPTOR_MEDIATED_SIGNALING_PATHWAY	22	0.289648	0.875275	0.606911	0.786684	1	4896	tags=45%, list=25%, signal=61%
GOBP_RESPIRATORY_ELECTRON_TRANSPORT_CHAIN	91	0.218854	0.87522	0.720297	0.786398	1	5605	tags=41%, list=29%, signal=57%
GOBP_REGULATION_OF_HAIR_CYCLE	26	0.277722	0.874135	0.661605	0.78825	1	4373	tags=35%, list=23%, signal=45%
GOBP_PHOSPHATIDYLINOSITOL_METABOLIC_PROCESS	148	0.199254	0.873157	0.795062	0.789892	1	5064	tags=32%, list=26%, signal=43%
GOBP_MYOBLAST_PROLIFERATION	16	0.322253	0.872171	0.627409	0.791516	1	2483	tags=19%, list=13%, signal=21%
GOBP_ALDEHYDE_BIOSYNTHETIC_PROCESS	16	0.316057	0.87178	0.635802	0.791925	1	2844	tags=38%, list=15%, signal=44%
GOBP_LEUKOCYTE_HOMEOSTASIS	88	0.221937	0.870494	0.742389	0.794215	1	4916	tags=35%, list=25%, signal=47%
GOBP_T_HELPER_1_CELL_DIFFERENTIATION	20	0.29588	0.870432	0.668712	0.793934	1	5733	tags=55%, list=30%, signal=78%
GOBP_PULMONARY_VALVE_DEVELOPMENT	19	0.301319	0.870248	0.661017	0.793894	1	4217	tags=32%, list=22%, signal=40%
GOBP_ENDOCARDIAL_CUSHION_FORMATION	30	0.274301	0.870213	0.675481	0.793544	1	4292	tags=30%, list=22%, signal=38%
GOBP_INTERMEDIATE_FILAMENT_ORGANIZATION	41	0.256339	0.869831	0.695745	0.793912	1	5298	tags=39%, list=27%, signal=54%
GOBP_MESENCHYME_MORPHOGENESIS	55	0.238904	0.869236	0.717833	0.794697	1	3999	tags=24%, list=21%, signal=30%
GOBP_DETECTION_OF_MECHANICAL_STIMULUS	47	0.246421	0.86909	0.691466	0.79459	1	2810	tags=23%, list=14%, signal=27%
GOBP_REGULATION_OF_PROTEIN_IMPORT	55	0.233845	0.868431	0.703529	0.795554	1	3419	tags=25%, list=18%, signal=31%
GOBP_CEREBRAL_CORTEX_CELL_MIGRATION	39	0.263667	0.868057	0.698876	0.795889	1	928	tags=10%, list=5%, signal=11%
GOBP_GLUCOSAMINE_CONTAINING_COMPOUND_METABOLIC_PROCESS	23	0.286668	0.867058	0.664583	0.797493	1	1602	tags=17%, list=8%, signal=19%
GOBP_CALCIUM_INDEPENDENT_CELL_CELL_ADHESION_VIA_PLASMA_MEMBRANE_CELL_ADHESION_MOLECULES	23	0.284466	0.864609	0.654945	0.802041	1	217	tags=9%, list=1%, signal=9%
GOBP_PH_REDUCTION	41	0.251011	0.864207	0.680171	0.802428	1	2817	tags=15%, list=15%, signal=17%
GOBP_NEGATIVE_REGULATION_OF_ADAPTIVE_IMMUNE_RESPONSE	56	0.234719	0.863636	0.722595	0.803145	1	3003	tags=20%, list=15%, signal=23%
GOBP_OLIGODENDROCYTE_DEVELOPMENT	40	0.256009	0.86213	0.702948	0.805772	1	1576	tags=15%, list=8%, signal=16%
GOBP_CRANIAL_SKELETAL_SYSTEM_DEVELOPMENT	68	0.233414	0.861101	0.735849	0.807412	1	4026	tags=31%, list=21%, signal=39%
GOBP_RESPONSE_TO_NICOTINE	47	0.244701	0.860501	0.70989	0.8082	1	2273	tags=17%, list=12%, signal=19%
GOBP_PTERIDINE_CONTAINING_COMPOUND_METABOLIC_PROCESS	33	0.267918	0.858822	0.699541	0.811162	1	5060	tags=33%, list=26%, signal=45%
GOBP_MATURATION_OF_SSU_RRNA	44	0.245744	0.857855	0.716518	0.812603	1	4073	tags=27%, list=21%, signal=34%
GOBP_NEGATIVE_REGULATION_OF_ANTIGEN_RECEPTOR_MEDIATED_SIGNALING_PATHWAY	31	0.265857	0.857241	0.692784	0.81342	1	2622	tags=26%, list=14%, signal=30%
GOBP_PROTEIN_MODIFICATION_BY_SMALL_PROTEIN_REMOVAL	146	0.197606	0.856668	0.84596	0.81411	1	3367	tags=21%, list=17%, signal=25%
GOBP_LABYRINTHINE_LAYER_BLOOD_VESSEL_DEVELOPMENT	19	0.301384	0.855466	0.671739	0.816078	1	3641	tags=32%, list=19%, signal=39%
GOBP_NEGATIVE_REGULATION_OF_CELL_SUBSTRATE_JUNCTION_ORGANIZATION	15	0.317342	0.855124	0.642384	0.816322	1	1321	tags=20%, list=7%, signal=21%
GOBP_NEGATIVE_REGULATION_OF_OXIDATIVE_STRESS_INDUCED_INTRINSIC_APOPTOTIC_SIGNALING_PATHWAY	17	0.309226	0.854651	0.657201	0.81684	1	3121	tags=29%, list=16%, signal=35%
GOBP_REGULATION_OF_DENDRITE_DEVELOPMENT	94	0.213372	0.85458	0.771795	0.816541	1	3325	tags=23%, list=17%, signal=28%
GOBP_3_UTR_MEDIATED_MRNA_STABILIZATION	18	0.301406	0.854164	0.647679	0.816903	1	1722	tags=22%, list=9%, signal=24%
GOBP_B_CELL_ACTIVATION_INVOLVED_IN_IMMUNE_RESPONSE	74	0.219682	0.853986	0.761682	0.816829	1	2295	tags=14%, list=12%, signal=15%
GOBP_DENTATE_GYRUS_DEVELOPMENT	17	0.305702	0.852015	0.661826	0.820301	1	6171	tags=53%, list=32%, signal=78%
GOBP_INTERMEDIATE_FILAMENT_BASED_PROCESS	65	0.228558	0.851438	0.745575	0.820975	1	4676	tags=29%, list=24%, signal=38%
GOBP_LYMPH_VESSEL_MORPHOGENESIS	21	0.29101	0.850887	0.682446	0.821694	1	6171	tags=62%, list=32%, signal=91%
GOBP_REGULATION_OF_DELAYED_RECTIFIER_POTASSIUM_CHANNEL_ACTIVITY	16	0.308658	0.850339	0.67551	0.822369	1	748	tags=13%, list=4%, signal=13%
GOBP_LIPID_IMPORT_INTO_CELL	15	0.316252	0.850323	0.676529	0.821977	1	2002	tags=33%, list=10%, signal=37%
GOBP_HEART_GROWTH	73	0.221643	0.849678	0.795673	0.822846	1	5980	tags=47%, list=31%, signal=67%
GOBP_SYNAPTIC_VESICLE_LOCALIZATION	49	0.233361	0.849059	0.73516	0.823604	1	1534	tags=12%, list=8%, signal=13%
GOBP_SYNCYTIUM_FORMATION	58	0.229811	0.848621	0.755344	0.824048	1	3946	tags=22%, list=20%, signal=28%
GOBP_METANEPHRIC_EPITHELIUM_DEVELOPMENT	23	0.287207	0.848365	0.690871	0.824106	1	1157	tags=17%, list=6%, signal=18%
GOBP_CARDIAC_CONDUCTION_SYSTEM_DEVELOPMENT	37	0.25644	0.847922	0.71024	0.824545	1	5442	tags=32%, list=28%, signal=45%
GOBP_TROPHECTODERMAL_CELL_DIFFERENTIATION	18	0.303004	0.846407	0.657267	0.826936	1	4434	tags=39%, list=23%, signal=50%
GOBP_NEGATIVE_REGULATION_OF_HEMOPOIESIS	98	0.212125	0.846272	0.788235	0.826749	1	3093	tags=21%, list=16%, signal=25%
GOBP_POSITIVE_REGULATION_OF_AMINE_TRANSPORT	37	0.25523	0.84602	0.744035	0.826797	1	669	tags=8%, list=3%, signal=8%
GOBP_NEGATIVE_REGULATION_OF_T_CELL_MEDIATED_IMMUNITY	26	0.27388	0.845799	0.686956	0.826797	1	1228	tags=12%, list=6%, signal=12%
GOBP_POSITIVE_REGULATION_OF_CALCIUM_ION_IMPORT	19	0.294042	0.845345	0.667364	0.82721	1	97	tags=5%, list=0%, signal=5%
GOBP_NEGATIVE_REGULATION_OF_CARTILAGE_DEVELOPMENT	25	0.280417	0.843644	0.697095	0.829924	1	1481	tags=12%, list=8%, signal=13%
GOBP_CALCIUM_ION_IMPORT	80	0.214078	0.843534	0.804348	0.829708	1	1154	tags=9%, list=6%, signal=9%
GOBP_T_CELL_SELECTION	49	0.23596	0.843277	0.751648	0.829739	1	5911	tags=41%, list=30%, signal=59%
GOBP_REGULATION_OF_RESPIRATORY_BURST	15	0.314211	0.843136	0.668845	0.829577	1	1499	tags=20%, list=8%, signal=22%
GOBP_RESPONSE_TO_ANTIBIOTIC	45	0.238702	0.842265	0.76009	0.830766	1	1872	tags=18%, list=10%, signal=20%
GOBP_REGULATION_OF_ANTIGEN_RECEPTOR_MEDIATED_SIGNALING_PATHWAY	60	0.225473	0.841453	0.76247	0.831849	1	4896	tags=37%, list=25%, signal=49%
GOBP_NEURAL_CREST_FORMATION	15	0.319541	0.839933	0.698718	0.834291	1	2153	tags=20%, list=11%, signal=22%
GOBP_METHIONINE_METABOLIC_PROCESS	15	0.313198	0.838718	0.680934	0.836095	1	3501	tags=20%, list=18%, signal=24%
GOBP_REGULATION_OF_AMYLOID_BETA_CLEARANCE	17	0.302683	0.838325	0.686316	0.836359	1	1903	tags=24%, list=10%, signal=26%
GOBP_NEGATIVE_REGULATION_OF_INFLAMMATORY_RESPONSE	133	0.197962	0.838315	0.867374	0.835943	1	1417	tags=11%, list=7%, signal=11%
GOBP_POSITIVE_REGULATION_OF_CHONDROCYTE_DIFFERENTIATION	16	0.308055	0.838084	0.707368	0.835916	1	2082	tags=13%, list=11%, signal=14%
GOBP_OSTEOBLAST_PROLIFERATION	30	0.262494	0.837037	0.733475	0.83741	1	445	tags=10%, list=2%, signal=10%
GOBP_NCRNA_TRANSCRIPTION	50	0.236368	0.83639	0.755344	0.838074	1	5545	tags=38%, list=29%, signal=53%
GOBP_POSITIVE_REGULATION_OF_CELL_MORPHOGENESIS_INVOLVED_IN_DIFFERENTIATION	73	0.215783	0.836251	0.82	0.837901	1	3098	tags=21%, list=16%, signal=24%
GOBP_MONOSACCHARIDE_CATABOLIC_PROCESS	38	0.252802	0.835468	0.723356	0.838902	1	5836	tags=37%, list=30%, signal=53%
GOBP_CERAMIDE_CATABOLIC_PROCESS	21	0.292196	0.834024	0.690083	0.841019	1	6521	tags=48%, list=34%, signal=72%
GOBP_REGULATION_OF_SYNAPTIC_VESICLE_RECYCLING	20	0.285704	0.833107	0.710317	0.842217	1	2008	tags=20%, list=10%, signal=22%
GOBP_GLYCEROLIPID_CATABOLIC_PROCESS	65	0.219444	0.833006	0.805104	0.841974	1	2226	tags=14%, list=11%, signal=16%
GOBP_POSITIVE_REGULATION_OF_CATION_CHANNEL_ACTIVITY	62	0.2179	0.832548	0.791574	0.842344	1	3280	tags=19%, list=17%, signal=23%
GOBP_ATP_TRANSPORT	16	0.300711	0.832401	0.702479	0.84218	1	2056	tags=19%, list=11%, signal=21%
GOBP_SELECTIVE_AUTOPHAGY	65	0.221751	0.831998	0.818807	0.84245	1	3049	tags=23%, list=16%, signal=27%
GOBP_CELLULAR_CARBOHYDRATE_CATABOLIC_PROCESS	36	0.248669	0.831816	0.758403	0.84233	1	3236	tags=25%, list=17%, signal=30%
GOBP_SYNAPTIC_VESICLE_TRANSPORT	37	0.245582	0.830543	0.765351	0.844084	1	414	tags=8%, list=2%, signal=8%
GOBP_HEPARIN_METABOLIC_PROCESS	15	0.313783	0.829739	0.693654	0.845055	1	4289	tags=33%, list=22%, signal=43%
GOBP_AUTOPHAGOSOME_ORGANIZATION	100	0.20136	0.829561	0.835476	0.844946	1	2186	tags=13%, list=11%, signal=15%
GOBP_PSEUDOURIDINE_SYNTHESIS	17	0.298413	0.828544	0.716567	0.846312	1	4614	tags=35%, list=24%, signal=46%
GOBP_PULMONARY_VALVE_MORPHOGENESIS	16	0.30303	0.828451	0.727848	0.846046	1	4217	tags=31%, list=22%, signal=40%
GOBP_GLIAL_CELL_APOPTOTIC_PROCESS	16	0.300976	0.828022	0.704684	0.846343	1	4081	tags=38%, list=21%, signal=47%
GOBP_REGULATION_OF_EMBRYONIC_DEVELOPMENT	54	0.231123	0.827289	0.756637	0.847175	1	3883	tags=31%, list=20%, signal=39%
GOBP_POSITIVE_REGULATION_OF_CILIUM_ASSEMBLY	23	0.272502	0.82694	0.741053	0.847352	1	2439	tags=22%, list=13%, signal=25%
GOBP_REGULATION_OF_PHOSPHOLIPASE_C_ACTIVITY	41	0.239104	0.82672	0.757174	0.847289	1	5762	tags=37%, list=30%, signal=52%
GOBP_DENDRITIC_SPINE_DEVELOPMENT	83	0.20866	0.825473	0.809639	0.848998	1	3322	tags=23%, list=17%, signal=28%
GOBP_NEGATIVE_REGULATION_OF_MUSCLE_CELL_APOPTOTIC_PROCESS	33	0.252422	0.825253	0.766055	0.848946	1	797	tags=12%, list=4%, signal=13%
GOBP_MYELOID_CELL_DEVELOPMENT	69	0.216157	0.82231	0.811189	0.853594	1	2186	tags=16%, list=11%, signal=18%
GOBP_NEUROEPITHELIAL_CELL_DIFFERENTIATION	24	0.267706	0.821892	0.751579	0.853874	1	923	tags=13%, list=5%, signal=13%
GOBP_REGULATION_OF_RESPONSE_TO_TUMOR_CELL	19	0.281052	0.820986	0.731809	0.85493	1	3602	tags=32%, list=19%, signal=39%
GOBP_CYTOCHROME_COMPLEX_ASSEMBLY	29	0.255768	0.820723	0.73913	0.854939	1	2420	tags=21%, list=12%, signal=24%
GOBP_PHAGOLYSOSOME_ASSEMBLY	16	0.300517	0.820616	0.691974	0.854701	1	6524	tags=56%, list=34%, signal=85%
GOBP_MITOCHONDRIAL_TRANSCRIPTION	15	0.302978	0.820078	0.707983	0.855185	1	6402	tags=47%, list=33%, signal=70%
GOBP_MATURE_B_CELL_DIFFERENTIATION	31	0.258062	0.818931	0.749455	0.856638	1	4469	tags=29%, list=23%, signal=38%
GOBP_PHOSPHOLIPID_HOMEOSTASIS	15	0.307281	0.818093	0.748441	0.857588	1	5459	tags=40%, list=28%, signal=56%
GOBP_GLYCOSPHINGOLIPID_BIOSYNTHETIC_PROCESS	31	0.258789	0.817647	0.754464	0.857876	1	4284	tags=35%, list=22%, signal=45%
GOBP_VENTRICULAR_SYSTEM_DEVELOPMENT	28	0.257828	0.817281	0.775641	0.858027	1	1682	tags=18%, list=9%, signal=20%
GOBP_T_HELPER_CELL_LINEAGE_COMMITMENT	17	0.292729	0.815437	0.714286	0.860556	1	1545	tags=18%, list=8%, signal=19%
GOBP_LYMPHOCYTE_ACTIVATION_INVOLVED_IN_IMMUNE_RESPONSE	184	0.184519	0.813715	0.92562	0.862963	1	3003	tags=17%, list=15%, signal=20%
GOBP_PHOSPHATE_ION_TRANSMEMBRANE_TRANSPORT	15	0.301662	0.812192	0.726562	0.865051	1	2140	tags=20%, list=11%, signal=22%
GOBP_REGULATION_OF_DOUBLE_STRAND_BREAK_REPAIR_VIA_HOMOLOGOUS_RECOMBINATION	57	0.218651	0.811632	0.78913	0.865516	1	2021	tags=18%, list=10%, signal=20%
GOBP_INNER_MITOCHONDRIAL_MEMBRANE_ORGANIZATION	32	0.251145	0.811103	0.773543	0.865941	1	3030	tags=25%, list=16%, signal=30%
GOBP_DENDRITIC_SPINE_MAINTENANCE	17	0.294394	0.810243	0.747899	0.866866	1	983	tags=12%, list=5%, signal=12%
GOBP_REGULATION_OF_PHOSPHOLIPID_BIOSYNTHETIC_PROCESS	17	0.294337	0.810029	0.744726	0.866731	1	3377	tags=29%, list=17%, signal=36%
GOBP_NEGATIVE_REGULATION_OF_LIPID_CATABOLIC_PROCESS	22	0.271565	0.809038	0.742981	0.867916	1	2372	tags=18%, list=12%, signal=21%
GOBP_INTERMEMBRANE_LIPID_TRANSFER	46	0.230451	0.807884	0.825688	0.869228	1	4857	tags=39%, list=25%, signal=52%
GOBP_CELLULAR_RESPONSE_TO_CHOLESTEROL	15	0.294357	0.807464	0.727273	0.869454	1	4281	tags=47%, list=22%, signal=60%
GOBP_MODULATION_OF_EXCITATORY_POSTSYNAPTIC_POTENTIAL	37	0.24414	0.804776	0.781737	0.873163	1	3027	tags=24%, list=16%, signal=29%
GOBP_REGULATION_OF_ANIMAL_ORGAN_FORMATION	29	0.249143	0.804552	0.779661	0.873075	1	21	tags=3%, list=0%, signal=3%
GOBP_MYOBLAST_FUSION	41	0.231208	0.802539	0.819383	0.875667	1	1587	tags=12%, list=8%, signal=13%
GOBP_POSITIVE_REGULATION_OF_OSTEOBLAST_DIFFERENTIATION	62	0.214037	0.802497	0.859649	0.875294	1	3582	tags=19%, list=18%, signal=24%
GOBP_MIRNA_METABOLIC_PROCESS	19	0.285153	0.801396	0.749441	0.876544	1	7067	tags=63%, list=36%, signal=99%
[truncated: 136 more rows]
