# Supplementary material for: A novel application of hectorite nanoclay for preparation of colorectal cancer spheroids with malignant potential
Source: Royal Society of Chemistry journal article supplement (doi:10.1039/d2lc00750a), 2023-01-01
Supplement: d2lc00750a3.xlsx [file d2lc00750a3.xlsx]

## Sheet: Dataset_S3
NAME	SIZE	ES	NES	NOM p-val	FDR q-val	FWER p-val	RANK AT MAX	LEADING EDGE
GOCC_LAMELLIPODIUM	182	0.468819	2.10246	0	0.00441482	0.003	2580	tags=33%, list=13%, signal=38%
GOCC_TRANS_GOLGI_NETWORK_TRANSPORT_VESICLE	30	0.647892	2.04279	0	0.0100818	0.014	2050	tags=43%, list=11%, signal=48%
GOCC_CARBOXY_TERMINAL_DOMAIN_PROTEIN_KINASE_COMPLEX	17	0.716679	2.00025	0	0.0117765	0.025	2952	tags=53%, list=15%, signal=62%
GOCC_SWI_SNF_COMPLEX	24	0.662621	1.99221	0	0.010576	0.03	2719	tags=54%, list=14%, signal=63%
GOCC_NBAF_COMPLEX	15	0.732061	1.98097	0	0.00956376	0.034	1381	tags=53%, list=7%, signal=57%
GOCC_FILOPODIUM	95	0.48113	1.90219	0	0.0237028	0.095	3973	tags=41%, list=20%, signal=51%
GOCC_ACTIN_BASED_CELL_PROJECTION	196	0.424179	1.89958	0	0.0209175	0.098	3186	tags=35%, list=16%, signal=42%
GOCC_ATPASE_COMPLEX	78	0.467172	1.82661	0	0.0445826	0.219	1405	tags=23%, list=7%, signal=25%
GOCC_ACTOMYOSIN	67	0.470423	1.77485	0	0.0712349	0.36	3155	tags=39%, list=16%, signal=46%
GOCC_ACTIN_FILAMENT_BUNDLE	67	0.463249	1.76762	0	0.0670875	0.374	3155	tags=37%, list=16%, signal=44%
GOCC_FILOPODIUM_MEMBRANE	18	0.619007	1.76425	0.012931	0.0627877	0.381	3606	tags=56%, list=19%, signal=68%
GOCC_CLATHRIN_COATED_PIT	68	0.458352	1.75218	0.00224215	0.0664861	0.421	2706	tags=34%, list=14%, signal=39%
GOCC_CELL_LEADING_EDGE	380	0.353973	1.70338	0	0.0980146	0.587	2833	tags=26%, list=15%, signal=30%
GOCC_CELL_SUBSTRATE_JUNCTION	393	0.352305	1.69513	0	0.0988895	0.621	3021	tags=27%, list=16%, signal=31%
GOCC_EXOCYST	15	0.632947	1.69158	0.012	0.0950939	0.635	3031	tags=40%, list=16%, signal=47%
GOCC_LYSOSOMAL_LUMEN	88	0.424059	1.6912	0	0.0892414	0.635	1451	tags=19%, list=7%, signal=21%
GOCC_ACTIN_CYTOSKELETON	452	0.344473	1.67985	0	0.0933945	0.679	2586	tags=25%, list=13%, signal=28%
GOCC_POSTSYNAPTIC_DENSITY_MEMBRANE	83	0.42294	1.66757	0.00235849	0.0981406	0.717	5714	tags=42%, list=29%, signal=60%
GOCC_PCG_PROTEIN_COMPLEX	27	0.539106	1.66669	0.00653595	0.0936558	0.72	2690	tags=41%, list=14%, signal=47%
GOCC_MICROVILLUS	84	0.424635	1.66324	0.00729927	0.0914237	0.73	3177	tags=38%, list=16%, signal=45%
GOCC_PROTEIN_ACETYLTRANSFERASE_COMPLEX	90	0.406176	1.64922	0.00231481	0.0992084	0.775	4028	tags=34%, list=21%, signal=43%
GOCC_DENDRITIC_SPINE_MEMBRANE	15	0.622278	1.63455	0.0196078	0.108157	0.806	464	tags=20%, list=2%, signal=20%
GOCC_HISTONE_METHYLTRANSFERASE_COMPLEX	56	0.44864	1.63208	0.015625	0.106239	0.813	5245	tags=46%, list=27%, signal=63%
GOCC_MYOSIN_COMPLEX	54	0.444981	1.60545	0.00728155	0.125609	0.88	2586	tags=28%, list=13%, signal=32%
GOCC_SYNAPTIC_VESICLE_MEMBRANE	100	0.392529	1.59785	0.00242718	0.128439	0.897	3129	tags=28%, list=16%, signal=33%
GOCC_SAGA_COMPLEX	20	0.54682	1.59618	0.022831	0.125412	0.902	3657	tags=45%, list=19%, signal=55%
GOCC_BASEMENT_MEMBRANE	86	0.400855	1.58687	0.00472813	0.130934	0.922	2777	tags=24%, list=14%, signal=28%
GOCC_GOLGI_ASSOCIATED_VESICLE	76	0.406895	1.56808	0.00987654	0.14537	0.944	3534	tags=33%, list=18%, signal=40%
GOCC_SAGA_TYPE_COMPLEX	34	0.470425	1.5655	0.0128755	0.143448	0.947	3657	tags=38%, list=19%, signal=47%
GOCC_HISTONE_DEACETYLASE_COMPLEX	65	0.414661	1.55689	0.00681818	0.148652	0.958	4414	tags=40%, list=23%, signal=52%
GOCC_RNA_POLYMERASE_II_HOLOENZYME	69	0.402143	1.55068	0.00911162	0.151539	0.963	3574	tags=33%, list=18%, signal=41%
GOCC_CORTICAL_ACTIN_CYTOSKELETON	72	0.400039	1.54141	0.00714286	0.158733	0.975	1490	tags=25%, list=8%, signal=27%
GOCC_INTRINSIC_COMPONENT_OF_POSTSYNAPTIC_DENSITY_MEMBRANE	50	0.430635	1.53553	0.029148	0.16027	0.979	2513	tags=22%, list=13%, signal=25%
GOCC_CELL_CELL_JUNCTION	462	0.314081	1.53514	0	0.156212	0.98	3722	tags=29%, list=19%, signal=35%
GOCC_GLIAL_CELL_PROJECTION	32	0.472471	1.52521	0.0184332	0.164417	0.984	3386	tags=38%, list=17%, signal=45%
GOCC_LATERAL_PLASMA_MEMBRANE	58	0.417656	1.52516	0.0258216	0.159887	0.984	2490	tags=31%, list=13%, signal=35%
GOCC_EXOCYTIC_VESICLE	203	0.344197	1.52234	0	0.159179	0.986	4048	tags=29%, list=21%, signal=36%
GOCC_TRANSCRIPTION_REGULATOR_COMPLEX	451	0.310789	1.52158	0	0.155944	0.986	2967	tags=24%, list=15%, signal=28%
GOCC_NODE_OF_RANVIER	15	0.564951	1.51909	0.0468432	0.154398	0.986	4314	tags=53%, list=22%, signal=69%
GOCC_TRANS_GOLGI_NETWORK_MEMBRANE	86	0.374566	1.50945	0.00699301	0.163046	0.992	2706	tags=23%, list=14%, signal=27%
GOCC_CLATHRIN_VESICLE_COAT	22	0.499402	1.49732	0.0430108	0.173164	0.995	2008	tags=36%, list=10%, signal=41%
GOCC_TIGHT_JUNCTION	122	0.355507	1.49621	0.00508906	0.170235	0.995	1971	tags=20%, list=10%, signal=22%
GOCC_PRESYNAPSE	465	0.301383	1.49274	0	0.171139	0.996	3407	tags=24%, list=18%, signal=28%
GOCC_COSTAMERE	16	0.539191	1.49125	0.0622318	0.169117	0.996	2031	tags=44%, list=10%, signal=49%
GOCC_ACTIN_FILAMENT	101	0.359577	1.4806	0.0100756	0.179019	0.998	2586	tags=27%, list=13%, signal=31%
GOCC_TRANS_GOLGI_NETWORK	226	0.320264	1.46798	0.00293255	0.191686	0.999	2502	tags=20%, list=13%, signal=23%
GOCC_AP_TYPE_MEMBRANE_COAT_ADAPTOR_COMPLEX	27	0.478173	1.46608	0.0479303	0.190226	1	2177	tags=22%, list=11%, signal=25%
GOCC_CLATHRIN_COATED_VESICLE_MEMBRANE	101	0.361023	1.46169	0.0168269	0.191783	1	3146	tags=27%, list=16%, signal=32%
GOCC_POSTSYNAPTIC_MEMBRANE	257	0.314577	1.46153	0.00303951	0.188124	1	6018	tags=38%, list=31%, signal=54%
GOCC_ADHERENS_JUNCTION	156	0.336861	1.45641	0.010582	0.191198	1	3520	tags=34%, list=18%, signal=41%
GOCC_PHOSPHATIDYLINOSITOL_3_KINASE_COMPLEX	27	0.467906	1.45405	0.0616016	0.1906	1	1563	tags=22%, list=8%, signal=24%
GOCC_METHYLTRANSFERASE_COMPLEX	84	0.366437	1.43845	0.0175879	0.209252	1	4845	tags=36%, list=25%, signal=47%
GOCC_VACUOLAR_LUMEN	160	0.329279	1.43776	0.00534759	0.206402	1	1451	tags=16%, list=7%, signal=17%
GOCC_DISTAL_AXON	251	0.316263	1.43412	0.00628931	0.207559	1	4875	tags=33%, list=25%, signal=43%
GOCC_CLATHRIN_COAT	36	0.433829	1.42829	0.0463576	0.211683	1	2008	tags=25%, list=10%, signal=28%
GOCC_LAMELLIPODIUM_MEMBRANE	21	0.485858	1.4191	0.0551724	0.221112	1	3606	tags=48%, list=19%, signal=58%
GOCC_NEURON_TO_NEURON_SYNAPSE	316	0.297336	1.40462	0	0.238063	1	3843	tags=26%, list=20%, signal=32%
GOCC_RECYCLING_ENDOSOME	171	0.318174	1.39821	0.0177215	0.2439	1	3048	tags=30%, list=16%, signal=35%
GOCC_PHOTORECEPTOR_OUTER_SEGMENT_MEMBRANE	15	0.518501	1.39691	0.0890269	0.241957	1	3742	tags=33%, list=19%, signal=41%
GOCC_HETEROCHROMATIN	58	0.383748	1.39603	0.0295455	0.23922	1	4340	tags=41%, list=22%, signal=53%
GOCC_NUCLEAR_PERIPHERY	118	0.335629	1.39572	0.0271605	0.235716	1	3805	tags=36%, list=20%, signal=44%
GOCC_SEX_CHROMOSOME	25	0.465067	1.39397	0.0772443	0.234825	1	947	tags=28%, list=5%, signal=29%
GOCC_LEADING_EDGE_MEMBRANE	161	0.321193	1.38835	0.0100503	0.239408	1	2833	tags=24%, list=15%, signal=27%
GOCC_SITE_OF_POLARIZED_GROWTH	153	0.319103	1.38638	0.0132275	0.238565	1	4436	tags=33%, list=23%, signal=42%
GOCC_NEURON_PROJECTION_TERMINUS	122	0.327715	1.38633	0.0127877	0.234918	1	3526	tags=22%, list=18%, signal=27%
GOCC_RIBONUCLEOPROTEIN_GRANULE	234	0.296866	1.38539	0.00533333	0.232732	1	4290	tags=32%, list=22%, signal=41%
GOCC_CORTICAL_CYTOSKELETON	99	0.338033	1.38501	0.0337349	0.229669	1	1490	tags=21%, list=8%, signal=23%
GOCC_RNA_POLYMERASE_II_TRANSCRIPTION_REGULATOR_COMPLEX	218	0.307166	1.38428	0.00591716	0.227564	1	2157	tags=22%, list=11%, signal=24%
GOCC_DENDRITE_CYTOPLASM	30	0.436594	1.38391	0.0770878	0.22499	1	4226	tags=43%, list=22%, signal=55%
GOCC_TRANSPORT_VESICLE	377	0.286595	1.38365	0.00343643	0.222199	1	3619	tags=25%, list=19%, signal=30%
GOCC_GLUTAMATERGIC_SYNAPSE	302	0.296104	1.38362	0	0.219108	1	2531	tags=20%, list=13%, signal=22%
GOCC_POSTSYNAPTIC_SPECIALIZATION_MEMBRANE	109	0.342313	1.38301	0.0284238	0.216761	1	5775	tags=40%, list=30%, signal=57%
GOCC_GUANYL_NUCLEOTIDE_EXCHANGE_FACTOR_COMPLEX	17	0.506112	1.37637	0.0983264	0.22424	1	6350	tags=65%, list=33%, signal=96%
GOCC_INTRINSIC_COMPONENT_OF_POSTSYNAPTIC_SPECIALIZATION_MEMBRANE	76	0.357199	1.37526	0.0425532	0.222681	1	5922	tags=42%, list=31%, signal=60%
GOCC_VESICLE_TETHERING_COMPLEX	55	0.373916	1.37518	0.0521542	0.219825	1	5629	tags=45%, list=29%, signal=64%
GOCC_IMMUNOLOGICAL_SYNAPSE	41	0.407045	1.37492	0.0878378	0.217325	1	2799	tags=27%, list=14%, signal=31%
GOCC_APICAL_JUNCTION_COMPLEX	134	0.324624	1.37491	0.0185185	0.214502	1	1971	tags=19%, list=10%, signal=21%
GOCC_BASAL_PART_OF_CELL	256	0.29802	1.37252	0.00828729	0.214971	1	3091	tags=22%, list=16%, signal=26%
GOCC_VACUOLAR_MEMBRANE	404	0.281217	1.37001	0	0.215405	1	2885	tags=23%, list=15%, signal=26%
GOCC_PRESYNAPTIC_ACTIVE_ZONE	72	0.360154	1.36895	0.0451467	0.214277	1	2465	tags=22%, list=13%, signal=25%
GOCC_CLATHRIN_COATED_VESICLE	179	0.306385	1.36861	0.0168539	0.212097	1	3594	tags=25%, list=19%, signal=31%
GOCC_AZUROPHIL_GRANULE_MEMBRANE	51	0.380114	1.36802	0.0675381	0.210376	1	2986	tags=35%, list=15%, signal=42%
GOCC_NEURON_PROJECTION_MEMBRANE	55	0.378783	1.36701	0.0501193	0.20918	1	859	tags=15%, list=4%, signal=15%
GOCC_NEURON_PROJECTION_CYTOPLASM	86	0.349138	1.36472	0.0523691	0.210288	1	3803	tags=33%, list=20%, signal=40%
GOCC_MAIN_AXON	59	0.365162	1.36335	0.0616438	0.209799	1	2833	tags=25%, list=15%, signal=30%
GOCC_NEURON_SPINE	168	0.309001	1.36227	0.0107527	0.209041	1	2904	tags=21%, list=15%, signal=25%
GOCC_MYELIN_SHEATH	42	0.396644	1.35756	0.0948276	0.212676	1	2244	tags=26%, list=12%, signal=30%
GOCC_NEUROTRANSMITTER_RECEPTOR_COMPLEX	43	0.387186	1.34623	0.0816327	0.225	1	5198	tags=35%, list=27%, signal=48%
GOCC_FICOLIN_1_RICH_GRANULE_MEMBRANE	54	0.375306	1.34579	0.0685225	0.22314	1	3746	tags=31%, list=19%, signal=39%
GOCC_TRANSCRIPTION_FACTOR_TFIID_COMPLEX	32	0.410422	1.34453	0.0927419	0.222505	1	3319	tags=34%, list=17%, signal=41%
GOCC_SPECIFIC_GRANULE	153	0.309665	1.34043	0.013369	0.225274	1	3011	tags=24%, list=16%, signal=28%
GOCC_INTEGRIN_COMPLEX	30	0.412415	1.34028	0.0765864	0.222976	1	4769	tags=33%, list=25%, signal=44%
GOCC_EARLY_ENDOSOME	356	0.277958	1.33993	0.01	0.220975	1	2998	tags=23%, list=15%, signal=27%
GOCC_ASTROCYTE_PROJECTION	18	0.474594	1.33667	0.145652	0.22308	1	2838	tags=39%, list=15%, signal=46%
GOCC_PLATELET_DENSE_GRANULE	20	0.471224	1.33597	0.0981211	0.221552	1	2890	tags=30%, list=15%, signal=35%
GOCC_TRANSPORT_VESICLE_MEMBRANE	193	0.295875	1.3325	0.0291005	0.224293	1	3129	tags=23%, list=16%, signal=27%
GOCC_PROTON_TRANSPORTING_TWO_SECTOR_ATPASE_COMPLEX	25	0.430102	1.33221	0.125265	0.222327	1	2891	tags=32%, list=15%, signal=38%
GOCC_SYNAPTIC_MEMBRANE	355	0.27736	1.33001	0.00321543	0.223103	1	5922	tags=35%, list=31%, signal=50%
GOCC_BASOLATERAL_PLASMA_MEMBRANE	217	0.294779	1.32722	0.0251397	0.22472	1	3055	tags=22%, list=16%, signal=25%
GOCC_PROTON_TRANSPORTING_V_TYPE_ATPASE_COMPLEX	24	0.435112	1.32656	0.135983	0.223219	1	2891	tags=33%, list=15%, signal=39%
GOCC_AZUROPHIL_GRANULE	142	0.302689	1.32529	0.0344828	0.222482	1	3176	tags=28%, list=16%, signal=33%
GOCC_MYOSIN_II_COMPLEX	22	0.441328	1.31991	0.120163	0.227282	1	7185	tags=59%, list=37%, signal=94%
GOCC_GOLGI_ASSOCIATED_VESICLE_MEMBRANE	44	0.376067	1.31925	0.09447	0.225884	1	1885	tags=25%, list=10%, signal=28%
GOCC_GOLGI_APPARATUS_SUBCOMPARTMENT	330	0.27758	1.31079	0.00593472	0.235961	1	2502	tags=18%, list=13%, signal=21%
GOCC_DENDRITIC_SHAFT	33	0.40443	1.31078	0.105376	0.233728	1	1639	tags=24%, list=8%, signal=26%
GOCC_CYTOPLASMIC_STRESS_GRANULE	72	0.339729	1.30487	0.0537383	0.239768	1	4237	tags=38%, list=22%, signal=48%
GOCC_CLATHRIN_ADAPTOR_COMPLEX	16	0.482723	1.30365	0.138947	0.239292	1	6918	tags=69%, list=36%, signal=107%
GOCC_SPECIFIC_GRANULE_MEMBRANE	86	0.325008	1.30107	0.0683962	0.241192	1	3255	tags=24%, list=17%, signal=29%
GOCC_PHAGOCYTIC_VESICLE	133	0.303391	1.29577	0.0481013	0.246427	1	2799	tags=20%, list=14%, signal=24%
GOCC_CELL_CORTEX	277	0.276546	1.29558	0.0151976	0.244405	1	1666	tags=17%, list=9%, signal=18%
GOCC_H4_HISTONE_ACETYLTRANSFERASE_COMPLEX	36	0.390588	1.29473	0.11879	0.243338	1	4605	tags=42%, list=24%, signal=55%
GOCC_RECEPTOR_COMPLEX	388	0.267189	1.29285	0.00732601	0.243838	1	3153	tags=18%, list=16%, signal=21%
GOCC_STEREOCILIUM_BUNDLE	53	0.364256	1.2867	0.100877	0.250883	1	3186	tags=32%, list=16%, signal=38%
GOCC_RNA_POLYMERASE_COMPLEX	93	0.321369	1.28654	0.0782828	0.248927	1	3869	tags=29%, list=20%, signal=36%
GOCC_ANCHORED_COMPONENT_OF_EXTERNAL_SIDE_OF_PLASMA_MEMBRANE	20	0.431987	1.27685	0.158859	0.261302	1	6255	tags=55%, list=32%, signal=81%
GOCC_CHLORIDE_CHANNEL_COMPLEX	48	0.361147	1.27454	0.116484	0.262642	1	3733	tags=33%, list=19%, signal=41%
GOCC_T_TUBULE	48	0.358009	1.27393	0.111364	0.261385	1	4840	tags=42%, list=25%, signal=55%
GOCC_CLATHRIN_COATED_ENDOCYTIC_VESICLE	86	0.315179	1.26022	0.106538	0.280553	1	5066	tags=36%, list=26%, signal=49%
GOCC_FIBRILLAR_CENTER	128	0.296669	1.25539	0.0850515	0.285877	1	2024	tags=19%, list=10%, signal=21%
GOCC_APICAL_PLASMA_MEMBRANE	341	0.262484	1.24545	0.021148	0.300224	1	3068	tags=21%, list=16%, signal=25%
GOCC_INTRINSIC_COMPONENT_OF_EXTERNAL_SIDE_OF_PLASMA_MEMBRANE	24	0.413208	1.24338	0.168831	0.301247	1	6255	tags=54%, list=32%, signal=80%
GOCC_DENDRITE_MEMBRANE	40	0.368912	1.24137	0.160356	0.30195	1	5346	tags=38%, list=28%, signal=52%
GOCC_RUFFLE	160	0.282724	1.23605	0.0757576	0.308522	1	2799	tags=23%, list=14%, signal=27%
GOCC_MICROBODY_LUMEN	49	0.349821	1.23568	0.167411	0.306653	1	3881	tags=33%, list=20%, signal=41%
GOCC_TRANSCRIPTION_ELONGATION_FACTOR_COMPLEX	40	0.366753	1.23537	0.12987	0.304607	1	3954	tags=40%, list=20%, signal=50%
GOCC_CELL_PROJECTION_MEMBRANE	314	0.259961	1.23481	0.0154799	0.303084	1	3125	tags=21%, list=16%, signal=25%
GOCC_AXON_CYTOPLASM	59	0.33277	1.23142	0.131183	0.306286	1	3803	tags=31%, list=20%, signal=38%
GOCC_MLL1_2_COMPLEX	28	0.392291	1.22763	0.169197	0.310481	1	6565	tags=57%, list=34%, signal=86%
GOCC_AMPA_GLUTAMATE_RECEPTOR_COMPLEX	24	0.406174	1.22752	0.186837	0.308241	1	1908	tags=17%, list=10%, signal=18%
GOCC_INTRINSIC_COMPONENT_OF_SYNAPTIC_VESICLE_MEMBRANE	39	0.367243	1.22678	0.163265	0.307158	1	2838	tags=23%, list=15%, signal=27%
GOCC_FILOPODIUM_TIP	17	0.433839	1.21487	0.208243	0.325715	1	2888	tags=35%, list=15%, signal=41%
GOCC_INTRINSIC_COMPONENT_OF_POSTSYNAPTIC_MEMBRANE	118	0.288008	1.21047	0.142132	0.331155	1	5775	tags=36%, list=30%, signal=50%
GOCC_TRANSPORTER_COMPLEX	368	0.250874	1.21007	0.0264706	0.329474	1	6356	tags=40%, list=33%, signal=59%
GOCC_APICAL_PART_OF_CELL	403	0.247637	1.20849	0.046729	0.329823	1	3663	tags=25%, list=19%, signal=30%
GOCC_NUCLEAR_SPECK	370	0.248671	1.199	0.0656716	0.344822	1	3804	tags=26%, list=20%, signal=32%
GOCC_SECRETORY_GRANULE_MEMBRANE	288	0.256106	1.19841	0.0471976	0.343303	1	3060	tags=22%, list=16%, signal=26%
GOCC_MICROBODY	130	0.281307	1.19522	0.112676	0.346725	1	3005	tags=25%, list=15%, signal=29%
GOCC_DYNACTIN_COMPLEX	16	0.425852	1.19143	0.230108	0.351207	1	4906	tags=31%, list=25%, signal=42%
GOCC_COATED_VESICLE	265	0.25657	1.18662	0.079452	0.357595	1	2050	tags=15%, list=11%, signal=17%
GOCC_MUSCLE_MYOSIN_COMPLEX	15	0.441863	1.18377	0.227926	0.360437	1	7185	tags=67%, list=37%, signal=106%
GOCC_MRNA_CLEAVAGE_FACTOR_COMPLEX	17	0.422751	1.17638	0.253465	0.372059	1	3943	tags=41%, list=20%, signal=52%
GOCC_PRESYNAPTIC_ACTIVE_ZONE_MEMBRANE	28	0.360051	1.16426	0.237687	0.393223	1	2416	tags=18%, list=12%, signal=20%
GOCC_P_BODY	80	0.298232	1.16298	0.2	0.393106	1	2120	tags=21%, list=11%, signal=24%
GOCC_EUCHROMATIN	49	0.325926	1.15656	0.200913	0.404116	1	3134	tags=33%, list=16%, signal=39%
GOCC_CELL_BODY_MEMBRANE	30	0.362416	1.15015	0.281059	0.415117	1	3799	tags=27%, list=20%, signal=33%
GOCC_CLUSTER_OF_ACTIN_BASED_CELL_PROJECTIONS	144	0.26599	1.14567	0.150376	0.421767	1	3186	tags=25%, list=16%, signal=30%
GOCC_SM_LIKE_PROTEIN_FAMILY_COMPLEX	71	0.297742	1.14082	0.206897	0.429709	1	3914	tags=30%, list=20%, signal=37%
GOCC_DESMOSOME	25	0.370154	1.13683	0.268344	0.436076	1	4778	tags=52%, list=25%, signal=69%
GOCC_ENDOCYTIC_VESICLE	324	0.239536	1.1356	0.125402	0.435733	1	3093	tags=19%, list=16%, signal=23%
GOCC_NEUROMUSCULAR_JUNCTION	64	0.299935	1.1348	0.247685	0.43448	1	1469	tags=17%, list=8%, signal=19%
GOCC_MICROBODY_MEMBRANE	60	0.304886	1.13345	0.228365	0.434616	1	3005	tags=27%, list=15%, signal=31%
GOCC_COATED_VESICLE_MEMBRANE	158	0.260801	1.13047	0.195122	0.438574	1	3146	tags=23%, list=16%, signal=27%
GOCC_RECYCLING_ENDOSOME_MEMBRANE	87	0.284233	1.12558	0.247368	0.447232	1	2998	tags=29%, list=15%, signal=34%
GOCC_RUFFLE_MEMBRANE	86	0.28141	1.12473	0.239024	0.446175	1	2072	tags=20%, list=11%, signal=22%
GOCC_NADH_DEHYDROGENASE_COMPLEX	39	0.335664	1.12186	0.254989	0.449727	1	6179	tags=46%, list=32%, signal=68%
GOCC_PML_BODY	93	0.282418	1.11967	0.2457	0.452089	1	2065	tags=15%, list=11%, signal=17%
GOCC_STEREOCILIUM_TIP	18	0.39377	1.11193	0.325	0.467077	1	3186	tags=33%, list=16%, signal=40%
GOCC_ENDOSOME_MEMBRANE	480	0.226542	1.10835	0.110701	0.472166	1	3035	tags=21%, list=16%, signal=24%
GOCC_COLLAGEN_CONTAINING_EXTRACELLULAR_MATRIX	398	0.229622	1.10685	0.121711	0.472606	1	3710	tags=22%, list=19%, signal=26%
GOCC_CYTOPLASMIC_SIDE_OF_MEMBRANE	180	0.25033	1.10402	0.223377	0.476662	1	3993	tags=28%, list=21%, signal=35%
GOCC_SET1C_COMPASS_COMPLEX	15	0.407887	1.10374	0.338843	0.474267	1	759	tags=20%, list=4%, signal=21%
GOCC_ENDOLYSOSOME_MEMBRANE	17	0.394105	1.10368	0.352814	0.471571	1	2008	tags=29%, list=10%, signal=33%
GOCC_TERTIARY_GRANULE_MEMBRANE	69	0.28968	1.10175	0.251142	0.473482	1	2689	tags=17%, list=14%, signal=20%
GOCC_H4_H2A_HISTONE_ACETYLTRANSFERASE_COMPLEX	23	0.363687	1.1012	0.33125	0.472006	1	4028	tags=39%, list=21%, signal=49%
GOCC_MULTIVESICULAR_BODY	53	0.311281	1.1001	0.297297	0.471739	1	2853	tags=21%, list=15%, signal=24%
GOCC_ACROSOMAL_MEMBRANE	26	0.345508	1.09127	0.328976	0.490288	1	2912	tags=35%, list=15%, signal=41%
GOCC_SARCOLEMMA	127	0.259231	1.08614	0.269231	0.499344	1	3021	tags=21%, list=16%, signal=25%
GOCC_FILAMENTOUS_ACTIN	28	0.340315	1.08392	0.326226	0.501635	1	3595	tags=36%, list=19%, signal=44%
GOCC_TRANSCRIPTION_REPRESSOR_COMPLEX	71	0.281143	1.08233	0.299304	0.502621	1	1846	tags=21%, list=10%, signal=23%
GOCC_I_BAND	132	0.252794	1.08112	0.264935	0.502794	1	5365	tags=40%, list=28%, signal=55%
GOCC_ION_CHANNEL_COMPLEX	272	0.230028	1.07299	0.217765	0.51968	1	6334	tags=39%, list=33%, signal=57%
GOCC_INTRINSIC_COMPONENT_OF_SYNAPTIC_MEMBRANE	152	0.244241	1.07225	0.260309	0.518415	1	5922	tags=34%, list=31%, signal=48%
GOCC_INTEGRAL_COMPONENT_OF_SYNAPTIC_VESICLE_MEMBRANE	28	0.33433	1.06922	0.336152	0.523007	1	2838	tags=21%, list=15%, signal=25%
GOCC_FICOLIN_1_RICH_GRANULE	165	0.241941	1.06769	0.271605	0.52394	1	2443	tags=18%, list=13%, signal=20%
GOCC_PLASMA_MEMBRANE_RAFT	105	0.258057	1.06398	0.302564	0.530228	1	2861	tags=24%, list=15%, signal=28%
GOCC_LATE_ENDOSOME	253	0.229501	1.06272	0.283379	0.530395	1	2853	tags=21%, list=15%, signal=24%
GOCC_SECONDARY_LYSOSOME	15	0.405825	1.05334	0.391304	0.551381	1	1754	tags=20%, list=9%, signal=22%
GOCC_AXON_INITIAL_SEGMENT	19	0.370245	1.05314	0.350333	0.548765	1	2715	tags=32%, list=14%, signal=37%
GOCC_EXCITATORY_SYNAPSE	50	0.295679	1.05086	0.372549	0.551608	1	6327	tags=50%, list=33%, signal=74%
GOCC_PROTEIN_COMPLEX_INVOLVED_IN_CELL_ADHESION	42	0.301096	1.03202	0.37931	0.597662	1	5889	tags=40%, list=30%, signal=58%
GOCC_CONTRACTILE_FIBER	226	0.225345	1.03029	0.357527	0.599192	1	3155	tags=20%, list=16%, signal=24%
GOCC_GOLGI_LUMEN	93	0.255279	1.02599	0.392523	0.607596	1	2185	tags=14%, list=11%, signal=16%
GOCC_TERMINAL_BOUTON	47	0.289994	1.02472	0.413551	0.60732	1	2655	tags=17%, list=14%, signal=20%
GOCC_SCHAFFER_COLLATERAL_CA1_SYNAPSE	69	0.273951	1.02151	0.405	0.612898	1	4468	tags=32%, list=23%, signal=41%
GOCC_TERTIARY_GRANULE	155	0.235018	1.01811	0.38843	0.618559	1	3746	tags=24%, list=19%, signal=29%
GOCC_TRANSFERASE_COMPLEX_TRANSFERRING_PHOSPHORUS_CONTAINING_GROUPS	239	0.219208	1.01318	0.426357	0.629169	1	2855	tags=21%, list=15%, signal=24%
GOCC_SPECIFIC_GRANULE_LUMEN	60	0.273405	1.01243	0.406467	0.628015	1	3629	tags=27%, list=19%, signal=33%
GOCC_CATALYTIC_STEP_2_SPLICEOSOME	79	0.254769	1.0106	0.408978	0.629689	1	3953	tags=25%, list=20%, signal=32%
GOCC_CLATHRIN_COATED_ENDOCYTIC_VESICLE_MEMBRANE	67	0.263973	1.00582	0.421525	0.639524	1	3589	tags=24%, list=18%, signal=29%
GOCC_VOLTAGE_GATED_CALCIUM_CHANNEL_COMPLEX	40	0.29399	1.00399	0.452915	0.641152	1	5033	tags=28%, list=26%, signal=37%
GOCC_PRECATALYTIC_SPLICEOSOME	50	0.282182	1.00331	0.460648	0.639755	1	3287	tags=24%, list=17%, signal=29%
GOCC_MEMBRANE_MICRODOMAIN	314	0.211333	1.00257	0.438871	0.638468	1	3153	tags=21%, list=16%, signal=25%
GOCC_ENDOLYSOSOME	26	0.328887	1.00131	0.434783	0.638569	1	2008	tags=23%, list=10%, signal=26%
GOCC_GABA_ERGIC_SYNAPSE	68	0.260992	0.999384	0.456265	0.640589	1	6018	tags=41%, list=31%, signal=59%
GOCC_SPERM_HEAD	16	0.365927	0.994162	0.462185	0.651574	1	2867	tags=25%, list=15%, signal=29%
GOCC_MEDIATOR_COMPLEX	35	0.302649	0.993284	0.473563	0.650813	1	4005	tags=26%, list=21%, signal=32%
GOCC_SPLICEOSOMAL_SNRNP_COMPLEX	53	0.274153	0.987876	0.467934	0.66285	1	3914	tags=30%, list=20%, signal=38%
GOCC_PERIKARYON	137	0.232926	0.987613	0.5075	0.660255	1	4226	tags=26%, list=22%, signal=32%
GOCC_PODOSOME	28	0.31148	0.984014	0.470968	0.666808	1	2978	tags=21%, list=15%, signal=25%
GOCC_90S_PRERIBOSOME	24	0.318889	0.98314	0.477987	0.665975	1	6119	tags=38%, list=32%, signal=55%
GOCC_MEMBRANE_COAT	76	0.254223	0.9804	0.479167	0.670329	1	2177	tags=16%, list=11%, signal=18%
GOCC_SARCOPLASMIC_RETICULUM_MEMBRANE	38	0.296273	0.980307	0.480263	0.667308	1	4528	tags=34%, list=23%, signal=45%
GOCC_STRIATED_MUSCLE_THIN_FILAMENT	19	0.34218	0.972991	0.462366	0.684227	1	2283	tags=21%, list=12%, signal=24%
GOCC_HIPPOCAMPAL_MOSSY_FIBER_TO_CA3_SYNAPSE	32	0.297218	0.969962	0.495495	0.689728	1	2367	tags=22%, list=12%, signal=25%
GOCC_ENDOCYTIC_VESICLE_MEMBRANE	181	0.217901	0.966681	0.557641	0.695828	1	3093	tags=20%, list=16%, signal=23%
GOCC_CELL_CELL_CONTACT_ZONE	64	0.259069	0.966527	0.5	0.692869	1	5280	tags=39%, list=27%, signal=53%
GOCC_BRUSH_BORDER	96	0.2349	0.952746	0.56582	0.728013	1	2899	tags=21%, list=15%, signal=24%
GOCC_PRESYNAPTIC_MEMBRANE	139	0.219596	0.948846	0.544	0.735561	1	5360	tags=29%, list=28%, signal=39%
GOCC_PHOTORECEPTOR_OUTER_SEGMENT	86	0.241679	0.948484	0.554455	0.733097	1	3756	tags=24%, list=19%, signal=30%
GOCC_GABA_RECEPTOR_COMPLEX	20	0.327698	0.94708	0.529167	0.733623	1	5914	tags=50%, list=30%, signal=72%
GOCC_BLOOD_MICROPARTICLE	100	0.231936	0.945821	0.584577	0.733668	1	437	tags=5%, list=2%, signal=5%
GOCC_LUMENAL_SIDE_OF_MEMBRANE	28	0.289714	0.944656	0.551653	0.733469	1	6133	tags=46%, list=32%, signal=68%
GOCC_9PLUS0_NON_MOTILE_CILIUM	121	0.223776	0.944524	0.580902	0.730316	1	3756	tags=24%, list=19%, signal=30%
GOCC_CATION_CHANNEL_COMPLEX	203	0.208229	0.944064	0.610497	0.728261	1	6856	tags=40%, list=35%, signal=62%
GOCC_SARCOPLASM	74	0.241542	0.941322	0.576577	0.732657	1	1726	tags=14%, list=9%, signal=15%
GOCC_POLYSOME	56	0.260242	0.938985	0.595937	0.735621	1	4207	tags=27%, list=22%, signal=34%
GOCC_MITOCHONDRIAL_MATRIX	424	0.193063	0.935251	0.747405	0.742504	1	4846	tags=30%, list=25%, signal=39%
GOCC_PHAGOCYTIC_VESICLE_MEMBRANE	72	0.238732	0.922544	0.616337	0.77408	1	1597	tags=14%, list=8%, signal=15%
GOCC_CALCIUM_CHANNEL_COMPLEX	61	0.249232	0.921225	0.63466	0.774012	1	3448	tags=18%, list=18%, signal=22%
GOCC_ANCHORED_COMPONENT_OF_PLASMA_MEMBRANE	61	0.250422	0.919845	0.625581	0.77435	1	4926	tags=31%, list=25%, signal=42%
GOCC_AXONAL_GROWTH_CONE	22	0.304014	0.916636	0.58658	0.779214	1	2861	tags=23%, list=15%, signal=27%
GOCC_GOLGI_STACK	127	0.21728	0.914535	0.670103	0.780846	1	4406	tags=28%, list=23%, signal=36%
GOCC_DYSTROPHIN_ASSOCIATED_GLYCOPROTEIN_COMPLEX	17	0.323831	0.906657	0.602174	0.797209	1	1867	tags=18%, list=10%, signal=20%
GOCC_INNER_MITOCHONDRIAL_MEMBRANE_PROTEIN_COMPLEX	110	0.219766	0.903798	0.685786	0.801031	1	5253	tags=36%, list=27%, signal=50%
GOCC_CALYX_OF_HELD	17	0.326161	0.9033	0.595699	0.798767	1	2465	tags=24%, list=13%, signal=27%
GOCC_ACROSOMAL_VESICLE	110	0.220905	0.901546	0.692308	0.799643	1	3274	tags=21%, list=17%, signal=25%
GOCC_PSEUDOPODIUM	17	0.321797	0.894559	0.606383	0.813141	1	2804	tags=18%, list=14%, signal=21%
GOCC_U5_SNRNP	16	0.327854	0.887728	0.62268	0.826453	1	3287	tags=31%, list=17%, signal=38%
GOCC_INHIBITORY_SYNAPSE	19	0.310764	0.886421	0.637652	0.826034	1	4435	tags=42%, list=23%, signal=55%
GOCC_U2_TYPE_SPLICEOSOMAL_COMPLEX	84	0.225126	0.885591	0.7	0.824263	1	3914	tags=25%, list=20%, signal=31%
GOCC_MYOFILAMENT	23	0.296262	0.885353	0.609148	0.821255	1	2946	tags=22%, list=15%, signal=26%
GOCC_CILIARY_MEMBRANE	69	0.235038	0.879133	0.703448	0.83211	1	3742	tags=23%, list=19%, signal=29%
GOCC_RESPIRASOME	82	0.222823	0.870789	0.739024	0.846575	1	5253	tags=40%, list=27%, signal=55%
GOCC_CATENIN_COMPLEX	31	0.272937	0.866566	0.686825	0.852555	1	3520	tags=29%, list=18%, signal=35%
GOCC_PRERIBOSOME	63	0.230645	0.864862	0.734118	0.852652	1	6396	tags=37%, list=33%, signal=54%
GOCC_APICOLATERAL_PLASMA_MEMBRANE	20	0.294133	0.854954	0.668058	0.870099	1	3542	tags=25%, list=18%, signal=31%
GOCC_SPLICEOSOMAL_COMPLEX	167	0.196525	0.849812	0.848806	0.87723	1	3953	tags=24%, list=20%, signal=30%
GOCC_GOLGI_CISTERNA	100	0.209375	0.848662	0.804348	0.875841	1	2181	tags=15%, list=11%, signal=17%
GOCC_INTERCALATED_DISC	46	0.240767	0.836679	0.744828	0.896323	1	3767	tags=26%, list=19%, signal=32%
GOCC_OXIDOREDUCTASE_COMPLEX	105	0.199544	0.835273	0.862069	0.895003	1	5370	tags=37%, list=28%, signal=51%
GOCC_PLASMA_MEMBRANE_SIGNALING_RECEPTOR_COMPLEX	173	0.189371	0.82956	0.886842	0.901941	1	4769	tags=25%, list=25%, signal=33%
GOCC_U2_SNRNP	19	0.283986	0.823019	0.70217	0.909722	1	2985	tags=26%, list=15%, signal=31%
GOCC_CUL3_RING_UBIQUITIN_LIGASE_COMPLEX	34	0.246627	0.821666	0.776722	0.908357	1	7687	tags=41%, list=40%, signal=68%
GOCC_INTERMEDIATE_FILAMENT	192	0.184891	0.820565	0.921196	0.906698	1	4881	tags=27%, list=25%, signal=36%
GOCC_CORE_MEDIATOR_COMPLEX	23	0.268122	0.820026	0.733471	0.903902	1	1401	tags=13%, list=7%, signal=14%
GOCC_OUTER_MITOCHONDRIAL_MEMBRANE_PROTEIN_COMPLEX	18	0.297505	0.819496	0.725207	0.90114	1	2462	tags=17%, list=13%, signal=19%
GOCC_ANCHORED_COMPONENT_OF_MEMBRANE	160	0.188923	0.819192	0.918367	0.897994	1	5040	tags=28%, list=26%, signal=38%
GOCC_POTASSIUM_CHANNEL_COMPLEX	85	0.206336	0.81881	0.85122	0.895108	1	6856	tags=46%, list=35%, signal=71%
GOCC_PRERIBOSOME_LARGE_SUBUNIT_PRECURSOR	19	0.280864	0.80687	0.746808	0.911088	1	6396	tags=53%, list=33%, signal=78%
GOCC_COLLAGEN_TRIMER	81	0.20303	0.801878	0.852874	0.915072	1	3894	tags=19%, list=20%, signal=23%
GOCC_PLATELET_ALPHA_GRANULE_MEMBRANE	17	0.283444	0.782848	0.742553	0.938402	1	60	tags=6%, list=0%, signal=6%
GOCC_INTRINSIC_COMPONENT_OF_PRESYNAPTIC_MEMBRANE	71	0.200674	0.770877	0.904232	0.950463	1	5360	tags=27%, list=28%, signal=37%
GOCC_NUCLEAR_OUTER_MEMBRANE	27	0.245701	0.763201	0.802998	0.9561	1	3141	tags=22%, list=16%, signal=26%
GOCC_CUL4_RING_E3_UBIQUITIN_LIGASE_COMPLEX	31	0.233751	0.747779	0.843818	0.970182	1	5884	tags=42%, list=30%, signal=60%
GOCC_PHOSPHATASE_COMPLEX	48	0.209564	0.746808	0.876126	0.967417	1	4743	tags=23%, list=24%, signal=30%
GOCC_GLYCOPROTEIN_COMPLEX	20	0.257866	0.744515	0.842437	0.96596	1	1867	tags=15%, list=10%, signal=17%
GOCC_RNA_POLYMERASE_III_COMPLEX	17	0.255603	0.704895	0.872651	0.997293	1	2568	tags=18%, list=13%, signal=20%
GOCC_U1_SNRNP	16	0.261399	0.702685	0.863548	0.995398	1	4554	tags=44%, list=23%, signal=57%
GOCC_ENDOSOME_LUMEN	34	0.208626	0.68115	0.935123	1	1	3390	tags=21%, list=17%, signal=25%
GOCC_MITOCHONDRIAL_PROTEIN_CONTAINING_COMPLEX	228	0.148895	0.680921	0.997207	1	1	5262	tags=29%, list=27%, signal=40%
GOCC_MYOSIN_FILAMENT	22	0.231499	0.677574	0.900648	1	1	4493	tags=23%, list=23%, signal=30%
GOCC_LUMENAL_SIDE_OF_ENDOPLASMIC_RETICULUM_MEMBRANE	24	0.222777	0.676379	0.894958	0.997724	1	6133	tags=42%, list=32%, signal=61%
GOCC_AGGRESOME	31	0.209496	0.675683	0.935268	0.994357	1	1855	tags=13%, list=10%, signal=14%
GOCC_ENDOPLASMIC_RETICULUM_TUBULAR_NETWORK	20	0.230243	0.664039	0.930586	0.996905	1	3932	tags=25%, list=20%, signal=31%
GOCC_GAP_JUNCTION	29	0.203504	0.646134	0.966874	1	1	2266	tags=14%, list=12%, signal=16%
GOCC_VOLTAGE_GATED_SODIUM_CHANNEL_COMPLEX	17	0.229168	0.620714	0.934911	1	1	3656	tags=24%, list=19%, signal=29%
GOCC_CUL2_RING_UBIQUITIN_LIGASE_COMPLEX	20	0.214898	0.615599	0.95112	1	1	6403	tags=45%, list=33%, signal=67%
GOCC_CONNEXIN_COMPLEX	19	0.21243	0.601503	0.935345	1	1	1333	tags=11%, list=7%, signal=11%
GOCC_SMALL_SUBUNIT_PROCESSOME	30	0.18592	0.595352	0.975771	1	1	6002	tags=30%, list=31%, signal=43%
GOCC_MITOCHONDRIAL_SMALL_RIBOSOMAL_SUBUNIT	24	0.183229	0.548263	0.980349	1	1	6715	tags=38%, list=35%, signal=57%
GOCC_SODIUM_CHANNEL_COMPLEX	26	0.174878	0.541273	0.977131	1	1	7061	tags=46%, list=36%, signal=72%
GOCC_CHITOSOME	18	0.193065	0.532944	0.970085	1	1	7702	tags=50%, list=40%, signal=83%
GOCC_NUCLEOID	40	0.151519	0.507939	0.995495	1	1	4328	tags=20%, list=22%, signal=26%
GOCC_MAGNESIUM_DEPENDENT_PROTEIN_SERINE_THREONINE_PHOSPHATASE_COMPLEX	26	0.154447	0.478067	0.991579	1	1	5389	tags=23%, list=28%, signal=32%
GOCC_TRICARBOXYLIC_ACID_CYCLE_ENZYME_COMPLEX	16	0.155278	0.412543	0.997921	0.999608	1	16395	tags=100%, list=84%, signal=644%
