# Supplementary material for: A novel application of hectorite nanoclay for preparation of colorectal cancer spheroids with malignant potential
Source: Royal Society of Chemistry journal article supplement (doi:10.1039/d2lc00750a), 2023-01-01
Supplement: d2lc00750a4.xlsx [file d2lc00750a4.xlsx]

## Sheet: Dataset_S4
NAME	SIZE	ES	NES	NOM p-val	FDR q-val	FWER p-val	RANK AT MAX	LEADING EDGE
GOMF_NUCLEOSOME_BINDING	46	0.599155	2.11041	0	0.0078287	0.006	3379	tags=54%, list=17%, signal=66%
GOMF_TAU_PROTEIN_KINASE_ACTIVITY	20	0.701437	2.00313	0	0.0276131	0.042	2590	tags=55%, list=13%, signal=63%
GOMF_WNT_PROTEIN_BINDING	29	0.612623	1.97174	0	0.0295509	0.066	3542	tags=45%, list=18%, signal=55%
GOMF_CHROMATIN_DNA_BINDING	84	0.496738	1.95959	0	0.0269233	0.081	2954	tags=38%, list=15%, signal=45%
GOMF_PHOSPHATASE_INHIBITOR_ACTIVITY	43	0.556724	1.92234	0	0.0374416	0.133	2151	tags=33%, list=11%, signal=37%
GOMF_PHOSPHOTYROSINE_RESIDUE_BINDING	42	0.535909	1.85537	0.00226244	0.0750401	0.296	4421	tags=48%, list=23%, signal=62%
GOMF_SEMAPHORIN_RECEPTOR_BINDING	21	0.616439	1.85429	0	0.0646893	0.298	1739	tags=43%, list=9%, signal=47%
GOMF_PROTEIN_PHOSPHORYLATED_AMINO_ACID_BINDING	52	0.510945	1.82923	0	0.0731224	0.372	4421	tags=46%, list=23%, signal=60%
GOMF_NUCLEOSOMAL_DNA_BINDING	23	0.632168	1.82819	0.0021645	0.0657212	0.377	3365	tags=61%, list=17%, signal=74%
GOMF_CLATHRIN_BINDING	61	0.488755	1.82422	0.002457	0.0638961	0.4	3739	tags=39%, list=19%, signal=49%
GOMF_ACTIN_FILAMENT_BINDING	202	0.410287	1.82398	0	0.0582037	0.401	2768	tags=28%, list=14%, signal=33%
GOMF_CORECEPTOR_ACTIVITY	43	0.527056	1.81083	0	0.0627475	0.457	797	tags=16%, list=4%, signal=17%
GOMF_TRANSCRIPTION_COACTIVATOR_ACTIVITY	241	0.390496	1.79503	0	0.0720296	0.538	2764	tags=28%, list=14%, signal=32%
GOMF_FIBROBLAST_GROWTH_FACTOR_RECEPTOR_BINDING	25	0.589178	1.79433	0	0.0672559	0.541	2308	tags=24%, list=12%, signal=27%
GOMF_CHLORIDE_CHANNEL_REGULATOR_ACTIVITY	15	0.660541	1.78545	0.00421053	0.0689567	0.568	2641	tags=40%, list=14%, signal=46%
GOMF_TRANSCRIPTION_COREGULATOR_BINDING	98	0.438715	1.78514	0	0.0648828	0.569	1692	tags=26%, list=9%, signal=28%
GOMF_CARGO_ADAPTOR_ACTIVITY	18	0.632626	1.77933	0.00619835	0.065603	0.592	2706	tags=44%, list=14%, signal=52%
GOMF_LYSINE_ACETYLATED_HISTONE_BINDING	22	0.594935	1.76953	0.00213675	0.068835	0.63	2981	tags=45%, list=15%, signal=54%
GOMF_HISTONE_METHYLTRANSFERASE_ACTIVITY	52	0.480204	1.76545	0.00241546	0.0681044	0.651	2705	tags=35%, list=14%, signal=40%
GOMF_ACTIN_BINDING	414	0.360783	1.74879	0	0.0764516	0.707	3208	tags=29%, list=17%, signal=35%
GOMF_HYDROLASE_ACTIVITY_ACTING_ON_CARBON_NITROGEN_BUT_NOT_PEPTIDE_BONDS_IN_LINEAR_AMIDES	68	0.460256	1.7473	0.00232558	0.0741709	0.715	3901	tags=34%, list=20%, signal=42%
GOMF_N_METHYLTRANSFERASE_ACTIVITY	80	0.43961	1.73967	0	0.0759237	0.736	2705	tags=29%, list=14%, signal=33%
GOMF_PROTEIN_METHYLTRANSFERASE_ACTIVITY	75	0.454433	1.73253	0.00225225	0.078657	0.765	1979	tags=27%, list=10%, signal=30%
GOMF_MICROFILAMENT_MOTOR_ACTIVITY	31	0.535691	1.71776	0.012766	0.0879299	0.813	2586	tags=35%, list=13%, signal=41%
GOMF_CALCIUM_RELEASE_CHANNEL_ACTIVITY	17	0.618641	1.71518	0.00606061	0.0865683	0.819	5902	tags=65%, list=30%, signal=93%
GOMF_LAMININ_BINDING	26	0.555504	1.71193	0.00847458	0.0858392	0.829	3412	tags=42%, list=18%, signal=51%
GOMF_PHOSPHATIDYLINOSITOL_3_KINASE_REGULATOR_ACTIVITY	17	0.61342	1.71036	0.0042735	0.0839828	0.834	2855	tags=41%, list=15%, signal=48%
GOMF_CHLORIDE_TRANSMEMBRANE_TRANSPORTER_ACTIVITY	16	0.610119	1.68908	0.00852879	0.100358	0.884	55	tags=13%, list=0%, signal=13%
GOMF_EXTRACELLULAR_MATRIX_BINDING	53	0.458193	1.68529	0.00902935	0.100279	0.893	3412	tags=30%, list=18%, signal=37%
GOMF_ACIDIC_AMINO_ACID_TRANSMEMBRANE_TRANSPORTER_ACTIVITY	16	0.611261	1.67906	0.0104384	0.103308	0.906	2838	tags=44%, list=15%, signal=51%
GOMF_MITOGEN_ACTIVATED_PROTEIN_KINASE_KINASE_KINASE_BINDING	17	0.588181	1.66939	0.018018	0.109471	0.926	4212	tags=53%, list=22%, signal=68%
GOMF_P53_BINDING	59	0.451828	1.65983	0	0.115685	0.941	2915	tags=34%, list=15%, signal=40%
GOMF_PHOSPHATASE_REGULATOR_ACTIVITY	102	0.409804	1.65803	0	0.11389	0.945	3632	tags=34%, list=19%, signal=42%
GOMF_ALDEHYDE_DEHYDROGENASE_NAD_P_PLUS_ACTIVITY	16	0.600614	1.65246	0.0174292	0.115103	0.951	634	tags=25%, list=3%, signal=26%
GOMF_EXOPEPTIDASE_ACTIVITY	95	0.399619	1.6481	0	0.11624	0.955	1422	tags=19%, list=7%, signal=20%
GOMF_HISTONE_LYSINE_N_METHYLTRANSFERASE_ACTIVITY	38	0.484151	1.64149	0.0114679	0.119732	0.962	1979	tags=37%, list=10%, signal=41%
GOMF_TRANSCRIPTION_COREGULATOR_ACTIVITY	447	0.333675	1.63731	0	0.1212	0.968	2764	tags=26%, list=14%, signal=30%
GOMF_PHOSPHOPROTEIN_BINDING	83	0.415791	1.63701	0.00247525	0.11831	0.969	4849	tags=45%, list=25%, signal=59%
GOMF_DISORDERED_DOMAIN_SPECIFIC_BINDING	30	0.504519	1.62655	0.0112108	0.125243	0.974	3999	tags=50%, list=21%, signal=63%
GOMF_S_ADENOSYLMETHIONINE_DEPENDENT_METHYLTRANSFERASE_ACTIVITY	133	0.380444	1.60222	0	0.151146	0.986	3499	tags=29%, list=18%, signal=35%
GOMF_POLYPEPTIDE_N_ACETYLGALACTOSAMINYLTRANSFERASE_ACTIVITY	17	0.560468	1.59301	0.0305677	0.159602	0.991	1865	tags=41%, list=10%, signal=46%
GOMF_ACETYLGALACTOSAMINYLTRANSFERASE_ACTIVITY	31	0.493476	1.58957	0.0105932	0.159918	0.991	1865	tags=32%, list=10%, signal=36%
GOMF_TAU_PROTEIN_BINDING	39	0.460722	1.58487	0.0165631	0.161939	0.993	2590	tags=33%, list=13%, signal=38%
GOMF_CHEMOREPELLENT_ACTIVITY	27	0.503915	1.58019	0.0043956	0.163571	0.994	2753	tags=37%, list=14%, signal=43%
GOMF_TRANSMEMBRANE_RECEPTOR_PROTEIN_KINASE_ACTIVITY	80	0.401703	1.56597	0.00913242	0.180405	0.996	1311	tags=15%, list=7%, signal=16%
GOMF_CYCLASE_ACTIVITY	18	0.553845	1.55682	0.0512295	0.189131	0.997	2932	tags=33%, list=15%, signal=39%
GOMF_INTRACELLULAR_LIGAND_GATED_ION_CHANNEL_ACTIVITY	30	0.484714	1.55473	0.0241228	0.1881	0.997	6220	tags=50%, list=32%, signal=73%
GOMF_SMAD_BINDING	70	0.407693	1.55	0.00688073	0.191492	0.998	2686	tags=30%, list=14%, signal=35%
GOMF_TRANSCRIPTION_COREPRESSOR_ACTIVITY	167	0.350417	1.54422	0.00255102	0.196178	0.998	2856	tags=30%, list=15%, signal=35%
GOMF_EPHRIN_RECEPTOR_BINDING	27	0.493107	1.54237	0.0305677	0.194975	0.998	3093	tags=41%, list=16%, signal=48%
GOMF_IONOTROPIC_GLUTAMATE_RECEPTOR_BINDING	20	0.528728	1.53091	0.0381356	0.208587	1	1305	tags=20%, list=7%, signal=21%
GOMF_HISTONE_DEACETYLASE_BINDING	104	0.378877	1.52725	0.00721154	0.20952	1	2301	tags=26%, list=12%, signal=29%
GOMF_PHOSPHORUS_OXYGEN_LYASE_ACTIVITY	20	0.520635	1.52237	0.0444915	0.213485	1	2932	tags=30%, list=15%, signal=35%
GOMF_POLY_A_BINDING	21	0.51645	1.52118	0.0414079	0.211631	1	1968	tags=33%, list=10%, signal=37%
GOMF_SIGNALING_ADAPTOR_ACTIVITY	78	0.396292	1.519	0.0103359	0.211264	1	4522	tags=44%, list=23%, signal=57%
GOMF_BASAL_TRANSCRIPTION_MACHINERY_BINDING	54	0.412356	1.51494	0.0158371	0.213311	1	6147	tags=52%, list=32%, signal=76%
GOMF_NUCLEOSIDE_TRIPHOSPHATASE_REGULATOR_ACTIVITY	439	0.310438	1.51465	0	0.20982	1	3792	tags=31%, list=20%, signal=38%
GOMF_LYSINE_N_METHYLTRANSFERASE_ACTIVITY	46	0.437266	1.51373	0.0220751	0.207644	1	1979	tags=30%, list=10%, signal=34%
GOMF_BETA_CATENIN_BINDING	81	0.378509	1.51349	0.0117096	0.204603	1	2157	tags=25%, list=11%, signal=28%
GOMF_ATPASE_COUPLED_INTRAMEMBRANE_LIPID_TRANSPORTER_ACTIVITY	27	0.492217	1.51162	0.0512295	0.203829	1	1463	tags=22%, list=8%, signal=24%
GOMF_MRNA_3_UTR_BINDING	84	0.385268	1.50976	0.00980392	0.203779	1	2031	tags=25%, list=10%, signal=28%
GOMF_PROTEIN_TYROSINE_KINASE_ACTIVITY	137	0.353293	1.50167	0.00522193	0.21224	1	3097	tags=26%, list=16%, signal=30%
GOMF_TRANSFERASE_ACTIVITY_TRANSFERRING_ONE_CARBON_GROUPS	193	0.337505	1.49968	0.0026455	0.212081	1	4862	tags=33%, list=25%, signal=44%
GOMF_MRNA_BINDING	270	0.31763	1.4948	0	0.216349	1	4353	tags=31%, list=22%, signal=40%
GOMF_ATPASE_COUPLED_CATION_TRANSMEMBRANE_TRANSPORTER_ACTIVITY	44	0.428603	1.49348	0.025641	0.215093	1	3068	tags=30%, list=16%, signal=35%
GOMF_METHYL_CPG_BINDING	24	0.49671	1.493	0.0314465	0.212456	1	4441	tags=42%, list=23%, signal=54%
GOMF_ANION_CATION_SYMPORTER_ACTIVITY	20	0.510498	1.48682	0.0524017	0.219341	1	1306	tags=25%, list=7%, signal=27%
GOMF_GUANYL_NUCLEOTIDE_EXCHANGE_FACTOR_ACTIVITY	211	0.329537	1.48461	0.00537634	0.21944	1	4070	tags=34%, list=21%, signal=42%
GOMF_PROTEIN_KINASE_A_BINDING	48	0.427064	1.48311	0.0238095	0.218636	1	1929	tags=29%, list=10%, signal=32%
GOMF_NADP_BINDING	47	0.408878	1.48088	0.0261905	0.219104	1	3567	tags=28%, list=18%, signal=34%
GOMF_LIGAND_GATED_CALCIUM_CHANNEL_ACTIVITY	26	0.473427	1.48008	0.0414079	0.217326	1	5902	tags=58%, list=30%, signal=83%
GOMF_GLUTAMATE_RECEPTOR_BINDING	38	0.444452	1.47424	0.0322581	0.22316	1	1305	tags=16%, list=7%, signal=17%
GOMF_PROTEIN_PHOSPHATASE_REGULATOR_ACTIVITY	84	0.373282	1.47186	0.0175439	0.223734	1	3632	tags=31%, list=19%, signal=38%
GOMF_LIPOPROTEIN_PARTICLE_RECEPTOR_BINDING	27	0.476018	1.46895	0.0401691	0.224987	1	2008	tags=33%, list=10%, signal=37%
GOMF_CATALYTIC_ACTIVITY_ACTING_ON_A_GLYCOPROTEIN	23	0.492061	1.46148	0.0619469	0.233716	1	221	tags=13%, list=1%, signal=13%
GOMF_GENERAL_TRANSCRIPTION_INITIATION_FACTOR_ACTIVITY	41	0.423775	1.45794	0.0474041	0.235821	1	2952	tags=34%, list=15%, signal=40%
GOMF_PROTEIN_TYROSINE_KINASE_BINDING	96	0.358719	1.45607	0.0238095	0.235565	1	4857	tags=36%, list=25%, signal=48%
GOMF_METALLOEXOPEPTIDASE_ACTIVITY	67	0.378506	1.4558	0.0296128	0.232906	1	1422	tags=15%, list=7%, signal=16%
GOMF_PHOSPHOTRANSFERASE_ACTIVITY_FOR_OTHER_SUBSTITUTED_PHOSPHATE_GROUPS	19	0.504263	1.45573	0.0665236	0.230103	1	1630	tags=32%, list=8%, signal=34%
GOMF_FLOPPASE_ACTIVITY	16	0.548748	1.45187	0.0425101	0.232924	1	1463	tags=31%, list=8%, signal=34%
GOMF_AMINOACYLTRANSFERASE_ACTIVITY	16	0.528231	1.45121	0.0647773	0.231124	1	2604	tags=25%, list=13%, signal=29%
GOMF_HISTONE_METHYLTRANSFERASE_ACTIVITY_H3_K4_SPECIFIC	16	0.518631	1.45105	0.0430328	0.228589	1	1979	tags=38%, list=10%, signal=42%
GOMF_LOW_DENSITY_LIPOPROTEIN_PARTICLE_RECEPTOR_BINDING	22	0.49574	1.45092	0.0659575	0.226146	1	2008	tags=36%, list=10%, signal=41%
GOMF_METHYLATED_HISTONE_BINDING	71	0.388336	1.45026	0.0201005	0.224369	1	3904	tags=32%, list=20%, signal=40%
GOMF_PRE_MRNA_BINDING	32	0.45651	1.44617	0.0481696	0.228406	1	5332	tags=47%, list=27%, signal=65%
GOMF_GTPASE_ACTIVATOR_ACTIVITY	238	0.31229	1.44587	0.00578035	0.22606	1	3783	tags=32%, list=19%, signal=39%
GOMF_TRANSMEMBRANE_RECEPTOR_PROTEIN_SERINE_THREONINE_KINASE_ACTIVITY	17	0.514591	1.44187	0.0897704	0.229609	1	954	tags=24%, list=5%, signal=25%
GOMF_RNA_POLYMERASE_II_GENERAL_TRANSCRIPTION_INITIATION_FACTOR_BINDING	22	0.47841	1.44152	0.0521042	0.227649	1	5080	tags=50%, list=26%, signal=68%
GOMF_SULFURIC_ESTER_HYDROLASE_ACTIVITY	16	0.536531	1.4408	0.0691057	0.22613	1	1070	tags=25%, list=6%, signal=26%
GOMF_DEACETYLASE_ACTIVITY	35	0.428233	1.43822	0.0589569	0.227563	1	3432	tags=34%, list=18%, signal=42%
GOMF_OXIDOREDUCTASE_ACTIVITY_ACTING_ON_THE_CH_NH_GROUP_OF_DONORS_NAD_OR_NADP_AS_ACCEPTOR	15	0.534554	1.43637	0.0778443	0.227812	1	421	tags=20%, list=2%, signal=20%
GOMF_TRANSCRIPTION_COREPRESSOR_BINDING	39	0.417514	1.43541	0.0514541	0.226548	1	2464	tags=33%, list=13%, signal=38%
GOMF_ATPASE_COUPLED_INORGANIC_ANION_TRANSMEMBRANE_TRANSPORTER_ACTIVITY	25	0.472773	1.43402	0.05625	0.225969	1	953	tags=12%, list=5%, signal=13%
GOMF_SIGNALING_RECEPTOR_COMPLEX_ADAPTOR_ACTIVITY	49	0.405701	1.43293	0.0414747	0.225067	1	4522	tags=43%, list=23%, signal=56%
GOMF_POTASSIUM_CHANNEL_REGULATOR_ACTIVITY	49	0.397908	1.43186	0.0470852	0.224536	1	3377	tags=37%, list=17%, signal=44%
GOMF_MAP_KINASE_KINASE_KINASE_ACTIVITY	25	0.47422	1.43151	0.0702128	0.22268	1	4941	tags=44%, list=25%, signal=59%
GOMF_PROTEOGLYCAN_BINDING	34	0.431656	1.4311	0.0536481	0.220918	1	2969	tags=26%, list=15%, signal=31%
GOMF_CADHERIN_BINDING	289	0.303801	1.43022	0	0.219879	1	2563	tags=26%, list=13%, signal=30%
GOMF_BICARBONATE_TRANSMEMBRANE_TRANSPORTER_ACTIVITY	20	0.485881	1.42661	0.0874752	0.22286	1	242	tags=15%, list=1%, signal=15%
GOMF_NUCLEAR_RECEPTOR_ACTIVITY	51	0.390082	1.42258	0.034965	0.226246	1	2125	tags=20%, list=11%, signal=22%
GOMF_OXIDOREDUCTASE_ACTIVITY_ACTING_ON_METAL_IONS	16	0.516766	1.41974	0.0944558	0.228135	1	377	tags=19%, list=2%, signal=19%
GOMF_STRUCTURAL_CONSTITUENT_OF_SYNAPSE	17	0.508734	1.41582	0.0843621	0.232215	1	1305	tags=29%, list=7%, signal=32%
GOMF_PROTEIN_DEACETYLASE_ACTIVITY	23	0.477784	1.41251	0.0829787	0.234708	1	3432	tags=39%, list=18%, signal=47%
GOMF_SH2_DOMAIN_BINDING	39	0.412286	1.40914	0.0586957	0.237146	1	2800	tags=36%, list=14%, signal=42%
GOMF_TRIGLYCERIDE_LIPASE_ACTIVITY	27	0.442725	1.40904	0.0561555	0.235072	1	3358	tags=37%, list=17%, signal=45%
GOMF_TRANSFORMING_GROWTH_FACTOR_BETA_RECEPTOR_BINDING	20	0.479901	1.40624	0.0826271	0.236945	1	4217	tags=45%, list=22%, signal=57%
GOMF_STRUCTURAL_CONSTITUENT_OF_MUSCLE	42	0.404834	1.40308	0.0502183	0.239427	1	5918	tags=50%, list=30%, signal=72%
GOMF_MIRNA_BINDING	27	0.460231	1.40199	0.0835165	0.238834	1	2888	tags=33%, list=15%, signal=39%
GOMF_EPHRIN_RECEPTOR_ACTIVITY	19	0.485047	1.40145	0.106383	0.237418	1	893	tags=21%, list=5%, signal=22%
GOMF_PROMOTER_SPECIFIC_CHROMATIN_BINDING	60	0.381472	1.39749	0.0432692	0.241068	1	2764	tags=28%, list=14%, signal=33%
GOMF_SH3_DOMAIN_BINDING	117	0.335306	1.39369	0.0194647	0.244451	1	2533	tags=26%, list=13%, signal=29%
GOMF_PHOSPHATASE_BINDING	185	0.314046	1.39252	0.0114286	0.244186	1	3632	tags=29%, list=19%, signal=36%
GOMF_SPECTRIN_BINDING	26	0.45738	1.39212	0.075	0.242535	1	2096	tags=31%, list=11%, signal=34%
GOMF_MODIFICATION_DEPENDENT_PROTEIN_BINDING	148	0.32206	1.39046	0.0110803	0.24279	1	3159	tags=27%, list=16%, signal=32%
GOMF_TRANSLATION_INITIATION_FACTOR_BINDING	27	0.439957	1.38496	0.0903361	0.249254	1	3522	tags=30%, list=18%, signal=36%
GOMF_L_AMINO_ACID_TRANSMEMBRANE_TRANSPORTER_ACTIVITY	56	0.377509	1.38386	0.0552885	0.248773	1	2838	tags=27%, list=15%, signal=31%
GOMF_PROLINE_RICH_REGION_BINDING	16	0.507089	1.37134	0.0930693	0.265519	1	2520	tags=38%, list=13%, signal=43%
GOMF_AMINO_ACID_TRANSMEMBRANE_TRANSPORTER_ACTIVITY	79	0.35846	1.37115	0.0381862	0.263562	1	2838	tags=24%, list=15%, signal=28%
GOMF_CAMP_RESPONSE_ELEMENT_BINDING	16	0.504697	1.36431	0.116129	0.272976	1	1701	tags=25%, list=9%, signal=27%
GOMF_ACTIN_MONOMER_BINDING	25	0.453812	1.36404	0.0932203	0.271272	1	2914	tags=32%, list=15%, signal=38%
GOMF_HISTONE_BINDING	216	0.301509	1.36349	0.00526316	0.269917	1	2764	tags=26%, list=14%, signal=30%
GOMF_RNA_POLYMERASE_BINDING	51	0.384428	1.36321	0.0689655	0.268169	1	3574	tags=33%, list=18%, signal=41%
GOMF_DNA_BINDING_TRANSCRIPTION_FACTOR_BINDING	433	0.277358	1.35937	0	0.271858	1	2778	tags=24%, list=14%, signal=27%
GOMF_PHOSPHOPROTEIN_PHOSPHATASE_ACTIVITY	167	0.309345	1.35806	0.0182292	0.271772	1	4595	tags=35%, list=24%, signal=46%
GOMF_TRANSMEMBRANE_RECEPTOR_PROTEIN_TYROSINE_KINASE_ACTIVITY	63	0.371795	1.35455	0.0532407	0.275379	1	1690	tags=14%, list=9%, signal=16%
GOMF_CELL_ADHESION_MOLECULE_BINDING	493	0.276314	1.35189	0	0.27771	1	3584	tags=27%, list=18%, signal=32%
GOMF_PROTEIN_C_TERMINUS_BINDING	166	0.308355	1.35092	0.0288714	0.277003	1	2777	tags=29%, list=14%, signal=33%
GOMF_ABC_TYPE_TRANSPORTER_ACTIVITY	49	0.37624	1.34859	0.067757	0.278637	1	1820	tags=20%, list=9%, signal=22%
GOMF_PHOSPHATASE_ACTIVITY	247	0.290852	1.34352	0.0169014	0.284904	1	4811	tags=35%, list=25%, signal=46%
GOMF_NAD_DEPENDENT_PROTEIN_DEACETYLASE_ACTIVITY	17	0.483145	1.34149	0.0860656	0.286057	1	3432	tags=41%, list=18%, signal=50%
GOMF_ATPASE_COUPLED_TRANSMEMBRANE_TRANSPORTER_ACTIVITY	105	0.329985	1.33933	0.0325581	0.287274	1	3068	tags=22%, list=16%, signal=26%
GOMF_LIGAND_GATED_ION_CHANNEL_ACTIVITY	142	0.308026	1.33638	0.020202	0.289913	1	5924	tags=40%, list=31%, signal=57%
GOMF_RECEPTOR_TYROSINE_KINASE_BINDING	71	0.344344	1.33362	0.058548	0.292539	1	4857	tags=37%, list=25%, signal=49%
GOMF_PROTEIN_SERINE_THREONINE_TYROSINE_KINASE_ACTIVITY	418	0.274396	1.3325	0.00327869	0.292178	1	3097	tags=24%, list=16%, signal=28%
GOMF_SIALYLTRANSFERASE_ACTIVITY	20	0.461528	1.33096	0.142241	0.292531	1	2114	tags=30%, list=11%, signal=34%
GOMF_CALMODULIN_BINDING	196	0.301448	1.33057	0.0130548	0.29101	1	2821	tags=24%, list=15%, signal=28%
GOMF_UDP_GLYCOSYLTRANSFERASE_ACTIVITY	120	0.315757	1.32409	0.0287958	0.299874	1	3518	tags=23%, list=18%, signal=28%
GOMF_ACTININ_BINDING	34	0.393063	1.32257	0.0975057	0.300197	1	5126	tags=47%, list=26%, signal=64%
GOMF_RNA_POLYMERASE_CORE_ENZYME_BINDING	37	0.390353	1.31913	0.100437	0.303861	1	3574	tags=32%, list=18%, signal=40%
GOMF_CORE_PROMOTER_SEQUENCE_SPECIFIC_DNA_BINDING	39	0.384568	1.31365	0.0982533	0.311005	1	2951	tags=38%, list=15%, signal=45%
GOMF_PHOSPHATIDYLINOSITOL_BINDING	251	0.283505	1.31065	0.0114943	0.314147	1	4863	tags=32%, list=25%, signal=42%
GOMF_PHOSPHATIDIC_ACID_BINDING	20	0.451744	1.30772	0.140725	0.317263	1	5540	tags=50%, list=29%, signal=70%
GOMF_HEPARAN_SULFATE_PROTEOGLYCAN_BINDING	17	0.467253	1.30679	0.141717	0.316662	1	2226	tags=24%, list=11%, signal=27%
GOMF_ORGANIC_ACID_TRANSMEMBRANE_TRANSPORTER_ACTIVITY	154	0.29809	1.30477	0.0374332	0.318413	1	3091	tags=21%, list=16%, signal=25%
GOMF_NUCLEAR_RECEPTOR_COACTIVATOR_ACTIVITY	51	0.35919	1.30222	0.0812641	0.321011	1	4774	tags=47%, list=25%, signal=62%
GOMF_REGULATORY_RNA_BINDING	38	0.385316	1.29823	0.125561	0.325825	1	2888	tags=26%, list=15%, signal=31%
GOMF_ACTIVE_ION_TRANSMEMBRANE_TRANSPORTER_ACTIVITY	251	0.282204	1.29498	0.0172911	0.329634	1	3068	tags=20%, list=16%, signal=23%
GOMF_PROTEIN_PHOSPHATASE_BINDING	141	0.300591	1.29066	0.0394089	0.335382	1	3632	tags=30%, list=19%, signal=37%
GOMF_CARBOXYLIC_ESTER_HYDROLASE_ACTIVITY	132	0.307925	1.29025	0.0509383	0.333924	1	4018	tags=27%, list=21%, signal=33%
GOMF_C4_DICARBOXYLATE_TRANSMEMBRANE_TRANSPORTER_ACTIVITY	15	0.478915	1.28996	0.175055	0.332122	1	5605	tags=47%, list=29%, signal=66%
GOMF_DIPEPTIDASE_ACTIVITY	15	0.484558	1.28938	0.133197	0.331079	1	5645	tags=47%, list=29%, signal=66%
GOMF_CARBOXYPEPTIDASE_ACTIVITY	40	0.375409	1.28422	0.124444	0.338692	1	3663	tags=30%, list=19%, signal=37%
GOMF_PROTEIN_PHOSPHATASE_1_BINDING	29	0.402389	1.27859	0.143488	0.347528	1	3627	tags=34%, list=19%, signal=42%
GOMF_DNA_BINDING_TRANSCRIPTION_ACTIVATOR_ACTIVITY	444	0.261681	1.27768	0.0131579	0.347082	1	2967	tags=20%, list=15%, signal=23%
GOMF_ACETYLTRANSFERASE_ACTIVITY	80	0.322519	1.27722	0.0646766	0.345719	1	4060	tags=34%, list=21%, signal=43%
GOMF_TRANSMEMBRANE_TRANSPORTER_BINDING	119	0.3061	1.27698	0.0534759	0.343973	1	3404	tags=29%, list=18%, signal=34%
GOMF_TELOMERIC_DNA_BINDING	36	0.390998	1.27522	0.175966	0.345396	1	5205	tags=42%, list=27%, signal=57%
GOMF_AMINOPEPTIDASE_ACTIVITY	35	0.387535	1.2747	0.135198	0.344287	1	2071	tags=23%, list=11%, signal=26%
GOMF_ACTIVE_TRANSMEMBRANE_TRANSPORTER_ACTIVITY	379	0.266489	1.27263	0.00980392	0.345675	1	3068	tags=20%, list=16%, signal=23%
GOMF_PROTEIN_SERINE_KINASE_ACTIVITY	333	0.26867	1.27218	0.0113314	0.344287	1	3012	tags=24%, list=16%, signal=28%
GOMF_LIGAND_GATED_ANION_CHANNEL_ACTIVITY	17	0.458024	1.27086	0.143478	0.344586	1	5914	tags=59%, list=30%, signal=85%
GOMF_FATTY_ACID_LIGASE_ACTIVITY	21	0.435782	1.27042	0.158351	0.343278	1	3091	tags=29%, list=16%, signal=34%
GOMF_SECONDARY_ACTIVE_TRANSMEMBRANE_TRANSPORTER_ACTIVITY	228	0.278605	1.26856	0.033241	0.344847	1	3061	tags=20%, list=16%, signal=23%
GOMF_PROTEIN_SERINE_THREONINE_KINASE_ACTIVITY	394	0.262249	1.26845	0.0131148	0.34296	1	2804	tags=22%, list=14%, signal=26%
GOMF_ION_GATED_CHANNEL_ACTIVITY	44	0.364813	1.26809	0.125275	0.341679	1	2213	tags=18%, list=11%, signal=20%
GOMF_FRIZZLED_BINDING	37	0.385696	1.26719	0.120253	0.34131	1	2153	tags=16%, list=11%, signal=18%
GOMF_RNA_METHYLTRANSFERASE_ACTIVITY	57	0.343375	1.26589	0.118421	0.341356	1	5068	tags=37%, list=26%, signal=50%
GOMF_ACYL_COA_BINDING	24	0.415053	1.26299	0.163482	0.34488	1	6601	tags=58%, list=34%, signal=88%
GOMF_HYDROLASE_ACTIVITY_ACTING_ON_CARBON_NITROGEN_BUT_NOT_PEPTIDE_BONDS	126	0.29294	1.26143	0.0819672	0.345733	1	4434	tags=31%, list=23%, signal=40%
GOMF_MAP_KINASE_KINASE_ACTIVITY	16	0.469054	1.25929	0.159827	0.347718	1	2804	tags=38%, list=14%, signal=44%
GOMF_ELECTRON_TRANSFER_ACTIVITY	106	0.3093	1.25859	0.0837438	0.346964	1	5335	tags=42%, list=27%, signal=57%
GOMF_TRANSCRIPTION_COACTIVATOR_BINDING	35	0.392098	1.25801	0.131034	0.346122	1	1692	tags=23%, list=9%, signal=25%
GOMF_PHOSPHATIDYLINOSITOL_3_KINASE_BINDING	28	0.401097	1.25751	0.169456	0.344996	1	2038	tags=25%, list=11%, signal=28%
GOMF_NADH_DEHYDROGENASE_ACTIVITY	36	0.36821	1.2531	0.142539	0.351147	1	6179	tags=47%, list=32%, signal=69%
GOMF_DICARBOXYLIC_ACID_TRANSMEMBRANE_TRANSPORTER_ACTIVITY	28	0.407055	1.25257	0.170306	0.349979	1	7433	tags=54%, list=38%, signal=87%
GOMF_S_ACYLTRANSFERASE_ACTIVITY	30	0.398935	1.24573	0.154545	0.360373	1	2363	tags=23%, list=12%, signal=27%
GOMF_POLY_PURINE_TRACT_BINDING	27	0.403009	1.24457	0.179266	0.360361	1	1968	tags=26%, list=10%, signal=29%
GOMF_PROTEIN_KINASE_A_REGULATORY_SUBUNIT_BINDING	25	0.405879	1.24412	0.198704	0.359137	1	1929	tags=32%, list=10%, signal=35%
GOMF_ANTIPORTER_ACTIVITY	86	0.311386	1.24293	0.0985577	0.359339	1	3061	tags=21%, list=16%, signal=25%
GOMF_GTPASE_BINDING	271	0.267797	1.24171	0.0352941	0.359708	1	3635	tags=27%, list=19%, signal=32%
GOMF_PDZ_DOMAIN_BINDING	74	0.32257	1.24004	0.106729	0.360549	1	4132	tags=30%, list=21%, signal=38%
GOMF_CYCLIC_NUCLEOTIDE_BINDING	36	0.368283	1.2371	0.167816	0.364171	1	2903	tags=22%, list=15%, signal=26%
GOMF_PRIMARY_ACTIVE_TRANSMEMBRANE_TRANSPORTER_ACTIVITY	164	0.283457	1.23707	0.0626703	0.362216	1	3799	tags=24%, list=20%, signal=29%
GOMF_STEROID_HORMONE_RECEPTOR_ACTIVITY	24	0.413651	1.23667	0.190678	0.360895	1	2740	tags=25%, list=14%, signal=29%
GOMF_GATED_CHANNEL_ACTIVITY	324	0.2604	1.23601	0.020649	0.360183	1	3767	tags=22%, list=19%, signal=27%
GOMF_CATION_CHLORIDE_SYMPORTER_ACTIVITY	15	0.458148	1.22241	0.214286	0.384606	1	967	tags=20%, list=5%, signal=21%
GOMF_SULFUR_COMPOUND_TRANSMEMBRANE_TRANSPORTER_ACTIVITY	49	0.344091	1.22064	0.168182	0.386019	1	3091	tags=24%, list=16%, signal=29%
GOMF_PHOSPHOLIPID_BINDING	433	0.248592	1.22025	0.0316456	0.38475	1	3966	tags=24%, list=20%, signal=30%
GOMF_PHOSPHATIDYLINOSITOL_4_PHOSPHATE_BINDING	26	0.397041	1.2199	0.19213	0.383497	1	4228	tags=38%, list=22%, signal=49%
GOMF_MODIFIED_AMINO_ACID_BINDING	87	0.307115	1.21858	0.125307	0.384077	1	3060	tags=25%, list=16%, signal=30%
GOMF_TRANSFORMING_GROWTH_FACTOR_BETA_BINDING	24	0.405476	1.21431	0.206751	0.390565	1	1481	tags=21%, list=8%, signal=23%
GOMF_FLIPPASE_ACTIVITY	17	0.445279	1.21007	0.235294	0.397222	1	1463	tags=18%, list=8%, signal=19%
GOMF_SPHINGOLIPID_TRANSPORTER_ACTIVITY	18	0.433805	1.20979	0.238281	0.395729	1	3102	tags=33%, list=16%, signal=40%
GOMF_N_ACYLTRANSFERASE_ACTIVITY	75	0.316457	1.20966	0.154545	0.394058	1	4060	tags=32%, list=21%, signal=40%
GOMF_GLUTATHIONE_TRANSFERASE_ACTIVITY	24	0.395632	1.20821	0.2	0.394919	1	2812	tags=25%, list=14%, signal=29%
GOMF_PHOSPHORIC_ESTER_HYDROLASE_ACTIVITY	335	0.256352	1.20674	0.0462963	0.395827	1	5050	tags=34%, list=26%, signal=46%
GOMF_PALMITOYLTRANSFERASE_ACTIVITY	36	0.363213	1.20655	0.193548	0.394161	1	2582	tags=28%, list=13%, signal=32%
GOMF_PHOSPHATIDYLINOSITOL_PHOSPHATE_BINDING	162	0.275017	1.20591	0.105263	0.393549	1	4633	tags=31%, list=24%, signal=40%
GOMF_NEUROTRANSMITTER_RECEPTOR_ACTIVITY	107	0.294304	1.20377	0.130653	0.395904	1	5914	tags=41%, list=30%, signal=59%
GOMF_CYTOSKELETAL_ANCHOR_ACTIVITY	22	0.403699	1.20303	0.226994	0.395483	1	5365	tags=50%, list=28%, signal=69%
GOMF_RETINOIC_ACID_BINDING	19	0.420539	1.20251	0.223602	0.394611	1	858	tags=16%, list=4%, signal=17%
GOMF_PHOSPHATIDYLINOSITOL_PHOSPHATE_KINASE_ACTIVITY	15	0.451319	1.20221	0.223913	0.393268	1	5729	tags=47%, list=30%, signal=66%
GOMF_ENZYME_ACTIVATOR_ACTIVITY	478	0.245675	1.20197	0.0392857	0.391785	1	3819	tags=28%, list=20%, signal=34%
GOMF_OXIDOREDUCTION_DRIVEN_ACTIVE_TRANSMEMBRANE_TRANSPORTER_ACTIVITY	59	0.322743	1.19461	0.171838	0.40423	1	6179	tags=47%, list=32%, signal=69%
GOMF_PROTEIN_KINASE_C_BINDING	47	0.342699	1.18931	0.17849	0.413013	1	3544	tags=30%, list=18%, signal=36%
GOMF_ACYLTRANSFERASE_ACTIVITY	221	0.258348	1.18755	0.0941476	0.41441	1	3427	tags=25%, list=18%, signal=30%
GOMF_TRANSMITTER_GATED_CHANNEL_ACTIVITY	58	0.326323	1.18672	0.193133	0.414053	1	5914	tags=47%, list=30%, signal=67%
GOMF_TRNA_METHYLTRANSFERASE_ACTIVITY	31	0.367937	1.18289	0.213483	0.419612	1	8051	tags=74%, list=41%, signal=127%
GOMF_PYROPHOSPHATE_HYDROLYSIS_DRIVEN_PROTON_TRANSMEMBRANE_TRANSPORTER_ACTIVITY	18	0.42789	1.18149	0.26087	0.420379	1	3068	tags=33%, list=16%, signal=40%
GOMF_BHLH_TRANSCRIPTION_FACTOR_BINDING	31	0.366027	1.17605	0.246187	0.429652	1	2778	tags=32%, list=14%, signal=38%
GOMF_ATPASE_COUPLED_ION_TRANSMEMBRANE_TRANSPORTER_ACTIVITY	15	0.433266	1.17551	0.251572	0.428574	1	2758	tags=33%, list=14%, signal=39%
GOMF_METALLOAMINOPEPTIDASE_ACTIVITY	24	0.380519	1.16708	0.247357	0.444702	1	2071	tags=21%, list=11%, signal=23%
GOMF_THIOLESTER_HYDROLASE_ACTIVITY	42	0.332275	1.16343	0.224944	0.450067	1	3644	tags=31%, list=19%, signal=38%
GOMF_NUCLEAR_RECEPTOR_BINDING	128	0.276501	1.16332	0.162304	0.448241	1	2178	tags=22%, list=11%, signal=24%
GOMF_ENDONUCLEASE_ACTIVITY	106	0.277959	1.16262	0.160428	0.447636	1	2761	tags=20%, list=14%, signal=23%
GOMF_LIGAND_GATED_CATION_CHANNEL_ACTIVITY	113	0.275208	1.16003	0.154589	0.451243	1	5924	tags=37%, list=31%, signal=53%
GOMF_INTEGRIN_BINDING	141	0.269721	1.15829	0.157333	0.453097	1	1298	tags=12%, list=7%, signal=13%
GOMF_GTP_DEPENDENT_PROTEIN_BINDING	22	0.39755	1.157	0.247166	0.454052	1	2384	tags=23%, list=12%, signal=26%
GOMF_PEPTIDE_LYSINE_N_ACETYLTRANSFERASE_ACTIVITY	31	0.359179	1.15628	0.231263	0.453583	1	3303	tags=29%, list=17%, signal=35%
GOMF_ACETYLGLUCOSAMINYLTRANSFERASE_ACTIVITY	39	0.346715	1.15598	0.230277	0.452186	1	3314	tags=23%, list=17%, signal=28%
GOMF_SULFATE_TRANSMEMBRANE_TRANSPORTER_ACTIVITY	16	0.428846	1.15447	0.266811	0.453596	1	3061	tags=19%, list=16%, signal=22%
GOMF_DNA_BINDING_TRANSCRIPTION_REPRESSOR_ACTIVITY	306	0.24406	1.15151	0.0867052	0.458224	1	2951	tags=19%, list=15%, signal=22%
GOMF_POSTSYNAPTIC_NEUROTRANSMITTER_RECEPTOR_ACTIVITY	62	0.304968	1.14891	0.202247	0.461788	1	5914	tags=45%, list=30%, signal=65%
GOMF_HYDROLASE_ACTIVITY_HYDROLYZING_O_GLYCOSYL_COMPOUNDS	80	0.294626	1.14833	0.202299	0.461131	1	4880	tags=31%, list=25%, signal=42%
GOMF_INORGANIC_ANION_TRANSMEMBRANE_TRANSPORTER_ACTIVITY	141	0.26753	1.14067	0.183938	0.47545	1	3061	tags=21%, list=16%, signal=24%
GOMF_PROTEIN_TYROSINE_PHOSPHATASE_ACTIVITY	97	0.283376	1.13929	0.213568	0.476449	1	2924	tags=26%, list=15%, signal=30%
GOMF_EXTRACELLULAR_LIGAND_GATED_ION_CHANNEL_ACTIVITY	70	0.297894	1.13701	0.208134	0.479583	1	5914	tags=44%, list=30%, signal=63%
GOMF_PROTEIN_KINASE_C_ACTIVITY	15	0.420877	1.137	0.282209	0.477513	1	4896	tags=53%, list=25%, signal=71%
GOMF_MRNA_3_UTR_AU_RICH_REGION_BINDING	21	0.383539	1.13658	0.279412	0.476538	1	3085	tags=38%, list=16%, signal=45%
GOMF_PHOSPHATIDYLINOSITOL_5_PHOSPHATE_BINDING	17	0.407355	1.13453	0.253579	0.478885	1	4228	tags=29%, list=22%, signal=38%
GOMF_MODIFIED_AMINO_ACID_TRANSMEMBRANE_TRANSPORTER_ACTIVITY	22	0.377051	1.1337	0.292247	0.478613	1	3606	tags=36%, list=19%, signal=45%
GOMF_E_BOX_BINDING	48	0.316928	1.13331	0.261905	0.477446	1	2778	tags=23%, list=14%, signal=27%
GOMF_TRANSLATION_REPRESSOR_ACTIVITY	22	0.383233	1.13112	0.288747	0.480127	1	4169	tags=32%, list=21%, signal=40%
GOMF_NAD_BINDING	53	0.311432	1.12594	0.24557	0.489762	1	2809	tags=25%, list=14%, signal=29%
GOMF_ALPHA_ACTININ_BINDING	26	0.371097	1.12547	0.301053	0.488637	1	5126	tags=50%, list=26%, signal=68%
GOMF_SODIUM_CHANNEL_REGULATOR_ACTIVITY	32	0.341767	1.12163	0.294505	0.495297	1	2562	tags=28%, list=13%, signal=32%
GOMF_MANGANESE_ION_BINDING	60	0.29938	1.12161	0.251174	0.493248	1	1886	tags=17%, list=10%, signal=18%
GOMF_KINASE_INHIBITOR_ACTIVITY	66	0.300852	1.12094	0.260563	0.492683	1	2072	tags=23%, list=11%, signal=25%
GOMF_SUMO_TRANSFERASE_ACTIVITY	22	0.376951	1.11592	0.305785	0.502505	1	637	tags=14%, list=3%, signal=14%
GOMF_MOLECULAR_ADAPTOR_ACTIVITY	336	0.232608	1.11579	0.141509	0.500791	1	2833	tags=21%, list=15%, signal=25%
GOMF_CHANNEL_REGULATOR_ACTIVITY	125	0.265823	1.11112	0.229592	0.50935	1	2641	tags=22%, list=14%, signal=26%
GOMF_BASIC_AMINO_ACID_TRANSMEMBRANE_TRANSPORTER_ACTIVITY	15	0.419511	1.11078	0.328512	0.507954	1	2661	tags=33%, list=14%, signal=39%
GOMF_S_ADENOSYL_L_METHIONINE_BINDING	15	0.40543	1.1086	0.335341	0.51108	1	1905	tags=27%, list=10%, signal=30%
GOMF_PASSIVE_TRANSMEMBRANE_TRANSPORTER_ACTIVITY	439	0.227319	1.10828	0.118211	0.509779	1	5055	tags=28%, list=26%, signal=36%
GOMF_KINASE_REGULATOR_ACTIVITY	207	0.242069	1.10423	0.202216	0.516898	1	2540	tags=21%, list=13%, signal=24%
GOMF_TRANSMEMBRANE_RECEPTOR_PROTEIN_PHOSPHATASE_ACTIVITY	16	0.403681	1.10254	0.321814	0.518643	1	2247	tags=31%, list=12%, signal=35%
GOMF_HYALURONIC_ACID_BINDING	24	0.362616	1.10189	0.329741	0.518046	1	255	tags=8%, list=1%, signal=8%
GOMF_NEUROTRANSMITTER_BINDING	17	0.401092	1.09826	0.317597	0.524289	1	6018	tags=59%, list=31%, signal=85%
GOMF_C_ACYLTRANSFERASE_ACTIVITY	20	0.383774	1.09729	0.329764	0.52443	1	4328	tags=35%, list=22%, signal=45%
GOMF_ANION_TRANSMEMBRANE_TRANSPORTER_ACTIVITY	296	0.234047	1.09666	0.188235	0.523839	1	3125	tags=20%, list=16%, signal=24%
GOMF_N_ACETYLTRANSFERASE_ACTIVITY	57	0.298668	1.09544	0.29976	0.524627	1	4060	tags=33%, list=21%, signal=42%
GOMF_GENERAL_TRANSCRIPTION_INITIATION_FACTOR_BINDING	50	0.303356	1.09458	0.302059	0.524625	1	5080	tags=36%, list=26%, signal=49%
GOMF_RNA_POLYMERASE_II_GENERAL_TRANSCRIPTION_INITIATION_FACTOR_ACTIVITY	36	0.32984	1.09064	0.324444	0.531549	1	2952	tags=28%, list=15%, signal=33%
GOMF_ANKYRIN_BINDING	18	0.391199	1.08855	0.331263	0.5345	1	4844	tags=39%, list=25%, signal=52%
GOMF_PHOSPHATIDYLINOSITOL_KINASE_ACTIVITY	18	0.388832	1.08068	0.35	0.551592	1	4900	tags=39%, list=25%, signal=52%
GOMF_SNAP_RECEPTOR_ACTIVITY	36	0.320783	1.08006	0.31087	0.551074	1	2689	tags=28%, list=14%, signal=32%
GOMF_ACID_THIOL_LIGASE_ACTIVITY	30	0.332987	1.07916	0.365801	0.551126	1	3091	tags=27%, list=16%, signal=32%
GOMF_PHOSPHOLIPASE_BINDING	20	0.365563	1.0704	0.355895	0.570374	1	2244	tags=25%, list=12%, signal=28%
GOMF_CALCIUM_DEPENDENT_PROTEIN_KINASE_ACTIVITY	19	0.362479	1.06793	0.36518	0.574173	1	5100	tags=53%, list=26%, signal=71%
GOMF_NOTCH_BINDING	21	0.370136	1.06645	0.371595	0.575596	1	181	tags=10%, list=1%, signal=10%
GOMF_PHOSPHOLIPID_TRANSPORTER_ACTIVITY	58	0.29066	1.06102	0.346241	0.587218	1	3102	tags=29%, list=16%, signal=35%
GOMF_LIPOPROTEIN_PARTICLE_RECEPTOR_ACTIVITY	17	0.374557	1.06099	0.365751	0.585027	1	1838	tags=29%, list=9%, signal=32%
GOMF_WATER_TRANSMEMBRANE_TRANSPORTER_ACTIVITY	16	0.392854	1.05655	0.389937	0.594268	1	3606	tags=25%, list=19%, signal=31%
GOMF_ORGANIC_ANION_TRANSMEMBRANE_TRANSPORTER_ACTIVITY	174	0.236857	1.0531	0.302326	0.600523	1	3125	tags=21%, list=16%, signal=24%
GOMF_INTRAMEMBRANE_LIPID_TRANSPORTER_ACTIVITY	39	0.308475	1.0522	0.383562	0.600412	1	1938	tags=21%, list=10%, signal=23%
GOMF_MAGNESIUM_ION_BINDING	200	0.23157	1.05086	0.332432	0.601642	1	4683	tags=31%, list=24%, signal=40%
GOMF_PROTEIN_PHOSPHATASE_2A_BINDING	29	0.329054	1.05011	0.382932	0.601255	1	2924	tags=34%, list=15%, signal=41%
GOMF_ALKALI_METAL_ION_BINDING	17	0.383472	1.04866	0.384146	0.602696	1	3068	tags=35%, list=16%, signal=42%
GOMF_EXTRACELLULAR_MATRIX_STRUCTURAL_CONSTITUENT_CONFERRING_TENSILE_STRENGTH	38	0.313867	1.0467	0.392324	0.605232	1	3894	tags=21%, list=20%, signal=26%
GOMF_PHOSPHATIDYLINOSITOL_4_5_BISPHOSPHATE_BINDING	75	0.270065	1.04394	0.375297	0.610047	1	3076	tags=20%, list=16%, signal=24%
GOMF_PEPTIDE_N_ACETYLTRANSFERASE_ACTIVITY	38	0.311196	1.0421	0.385301	0.612774	1	3303	tags=24%, list=17%, signal=28%
GOMF_BILE_ACID_TRANSMEMBRANE_TRANSPORTER_ACTIVITY	19	0.36792	1.04191	0.397119	0.611025	1	2089	tags=21%, list=11%, signal=24%
GOMF_VITAMIN_B6_BINDING	46	0.295509	1.03658	0.391011	0.622568	1	2829	tags=22%, list=15%, signal=25%
GOMF_POTASSIUM_ION_TRANSMEMBRANE_TRANSPORTER_ACTIVITY	150	0.239937	1.03633	0.3425	0.620944	1	7100	tags=45%, list=37%, signal=70%
GOMF_PHOSPHATIDYLINOSITOL_3_4_5_TRISPHOSPHATE_BINDING	38	0.306431	1.03434	0.397647	0.624091	1	4727	tags=39%, list=24%, signal=52%
GOMF_EXTRACELLULAR_MATRIX_STRUCTURAL_CONSTITUENT	162	0.239295	1.03399	0.370667	0.622722	1	3393	tags=18%, list=17%, signal=22%
GOMF_POLY_PYRIMIDINE_TRACT_BINDING	26	0.335367	1.03273	0.381818	0.623634	1	947	tags=19%, list=5%, signal=20%
GOMF_CGMP_BINDING	15	0.383806	1.03052	0.433333	0.627063	1	2903	tags=20%, list=15%, signal=23%
GOMF_PHOSPHATIDYLCHOLINE_TRANSPORTER_ACTIVITY	18	0.370292	1.03001	0.417021	0.626032	1	2042	tags=22%, list=11%, signal=25%
GOMF_PROTEIN_SERINE_THREONINE_PHOSPHATASE_ACTIVITY	96	0.255588	1.02541	0.387324	0.635902	1	4212	tags=28%, list=22%, signal=36%
GOMF_OXIDOREDUCTASE_ACTIVITY_ACTING_ON_THE_ALDEHYDE_OR_OXO_GROUP_OF_DONORS_NAD_OR_NADP_AS_ACCEPTOR	38	0.304103	1.02519	0.410989	0.634244	1	634	tags=13%, list=3%, signal=14%
GOMF_ORGANIC_HYDROXY_COMPOUND_TRANSMEMBRANE_TRANSPORTER_ACTIVITY	47	0.287207	1.02484	0.400428	0.632855	1	2110	tags=17%, list=11%, signal=19%
GOMF_OXIDOREDUCTASE_ACTIVITY_ACTING_ON_A_HEME_GROUP_OF_DONORS	17	0.371373	1.02441	0.421268	0.631849	1	4557	tags=41%, list=23%, signal=54%
GOMF_TRANSFERASE_ACTIVITY_TRANSFERRING_SULPHUR_CONTAINING_GROUPS	67	0.272986	1.02193	0.421801	0.635838	1	1302	tags=12%, list=7%, signal=13%
GOMF_SCAFFOLD_PROTEIN_BINDING	62	0.27796	1.02082	0.421634	0.63664	1	4322	tags=31%, list=22%, signal=39%
GOMF_RETINOIC_ACID_RECEPTOR_BINDING	22	0.33791	1.02062	0.446469	0.63509	1	1189	tags=27%, list=6%, signal=29%
GOMF_CATION_CHANNEL_ACTIVITY	304	0.217582	1.0174	0.40176	0.641512	1	6343	tags=35%, list=33%, signal=51%
GOMF_UBIQUITIN_LIKE_PROTEIN_CONJUGATING_ENZYME_BINDING	32	0.310825	1.01657	0.45666	0.641553	1	1142	tags=13%, list=6%, signal=13%
GOMF_CAMP_BINDING	23	0.342095	1.01498	0.428571	0.643385	1	2261	tags=17%, list=12%, signal=20%
GOMF_METALLOPEPTIDASE_ACTIVITY	181	0.230961	1.01369	0.421918	0.644495	1	1422	tags=10%, list=7%, signal=11%
GOMF_HORMONE_BINDING	84	0.254588	1.01253	0.421911	0.64506	1	4967	tags=36%, list=26%, signal=48%
GOMF_MYOSIN_V_BINDING	16	0.378123	1.01055	0.441532	0.648032	1	3523	tags=31%, list=18%, signal=38%
GOMF_INTRACELLULAR_CALCIUM_ACTIVATED_CHLORIDE_CHANNEL_ACTIVITY	18	0.35769	1.00964	0.452869	0.648011	1	4306	tags=39%, list=22%, signal=50%
GOMF_ANION_CHANNEL_ACTIVITY	79	0.25664	1.00946	0.455882	0.646309	1	3861	tags=29%, list=20%, signal=36%
GOMF_VOLTAGE_GATED_CALCIUM_CHANNEL_ACTIVITY	43	0.288952	1.00889	0.42511	0.645504	1	5902	tags=30%, list=30%, signal=43%
GOMF_UBIQUITIN_CONJUGATING_ENZYME_BINDING	27	0.328361	1.00495	0.440529	0.653838	1	1142	tags=15%, list=6%, signal=16%
GOMF_OXIDOREDUCTASE_ACTIVITY_ACTING_ON_THE_ALDEHYDE_OR_OXO_GROUP_OF_DONORS	46	0.288389	1.00416	0.443439	0.653664	1	813	tags=13%, list=4%, signal=14%
GOMF_MYOSIN_BINDING	68	0.264553	1.00227	0.452436	0.656328	1	3723	tags=24%, list=19%, signal=29%
GOMF_P_TYPE_TRANSMEMBRANE_TRANSPORTER_ACTIVITY	19	0.351946	0.99969	0.458078	0.661001	1	4822	tags=37%, list=25%, signal=49%
GOMF_METALLOCARBOXYPEPTIDASE_ACTIVITY	27	0.323127	0.998961	0.439825	0.660707	1	3663	tags=26%, list=19%, signal=32%
GOMF_COA_HYDROLASE_ACTIVITY	24	0.330816	0.996393	0.462777	0.665125	1	3301	tags=38%, list=17%, signal=45%
GOMF_EXTRACELLULAR_MATRIX_STRUCTURAL_CONSTITUENT_CONFERRING_COMPRESSION_RESISTANCE	22	0.333067	0.995728	0.45738	0.66475	1	210	tags=9%, list=1%, signal=9%
GOMF_PROTEIN_N_TERMINUS_BINDING	98	0.244172	0.991386	0.459658	0.673613	1	3600	tags=26%, list=19%, signal=31%
GOMF_OXIDOREDUCTASE_ACTIVITY_ACTING_ON_THE_CH_NH_GROUP_OF_DONORS	24	0.324825	0.989164	0.486542	0.677241	1	1579	tags=17%, list=8%, signal=18%
GOMF_RIBOSOMAL_SMALL_SUBUNIT_BINDING	16	0.363958	0.98861	0.466667	0.676392	1	3580	tags=44%, list=18%, signal=54%
GOMF_14_3_3_PROTEIN_BINDING	25	0.317147	0.985715	0.473684	0.681756	1	3012	tags=32%, list=16%, signal=38%
GOMF_INTRAMOLECULAR_OXIDOREDUCTASE_ACTIVITY_TRANSPOSING_C_C_BONDS	15	0.374469	0.983912	0.476578	0.684195	1	2075	tags=20%, list=11%, signal=22%
GOMF_RECEPTOR_SERINE_THREONINE_KINASE_BINDING	25	0.328034	0.983437	0.509595	0.683211	1	5687	tags=52%, list=29%, signal=73%
GOMF_TRANSLATION_REGULATOR_ACTIVITY	111	0.238147	0.982942	0.474227	0.682281	1	4169	tags=28%, list=21%, signal=35%
GOMF_ENDORIBONUCLEASE_ACTIVITY	60	0.262915	0.975028	0.516355	0.700687	1	2680	tags=18%, list=14%, signal=21%
GOMF_GDP_DISSOCIATION_INHIBITOR_ACTIVITY	16	0.352077	0.973324	0.498969	0.702832	1	662	tags=19%, list=3%, signal=19%
GOMF_PURINE_NUCLEOTIDE_TRANSMEMBRANE_TRANSPORTER_ACTIVITY	20	0.345452	0.970348	0.516704	0.708242	1	2674	tags=30%, list=14%, signal=35%
GOMF_FATTY_ACID_DERIVATIVE_BINDING	22	0.322079	0.96831	0.490486	0.711194	1	3189	tags=27%, list=16%, signal=33%
GOMF_INSULIN_RECEPTOR_BINDING	20	0.33423	0.966428	0.512245	0.713707	1	4295	tags=45%, list=22%, signal=58%
GOMF_CATALYTIC_ACTIVITY_ACTING_ON_A_RRNA	17	0.350159	0.965577	0.50211	0.713705	1	4813	tags=35%, list=25%, signal=47%
GOMF_OXIDOREDUCTASE_ACTIVITY_ACTING_ON_SINGLE_DONORS_WITH_INCORPORATION_OF_MOLECULAR_OXYGEN	24	0.32553	0.965464	0.512448	0.71171	1	2511	tags=25%, list=13%, signal=29%
GOMF_DEATH_RECEPTOR_BINDING	19	0.341672	0.964683	0.508658	0.711649	1	1167	tags=16%, list=6%, signal=17%
GOMF_ACETYLCHOLINE_RECEPTOR_ACTIVITY	22	0.319677	0.95941	0.510374	0.723382	1	5700	tags=41%, list=29%, signal=58%
GOMF_HEXOSYLTRANSFERASE_ACTIVITY	171	0.218516	0.958706	0.594444	0.722906	1	2530	tags=15%, list=13%, signal=17%
GOMF_AMINO_ACID_BINDING	48	0.273187	0.955667	0.536264	0.728664	1	4048	tags=33%, list=21%, signal=42%
GOMF_SYNTAXIN_BINDING	70	0.248842	0.949287	0.553377	0.742518	1	1265	tags=14%, list=7%, signal=15%
GOMF_PROTEIN_TYROSINE_KINASE_ACTIVATOR_ACTIVITY	17	0.345699	0.949072	0.518595	0.740734	1	4870	tags=41%, list=25%, signal=55%
GOMF_PHOSPHATASE_ACTIVATOR_ACTIVITY	21	0.323121	0.948353	0.541667	0.740159	1	5760	tags=57%, list=30%, signal=81%
GOMF_STEROID_BINDING	97	0.235573	0.946098	0.551402	0.743521	1	2966	tags=25%, list=15%, signal=29%
GOMF_AMIDE_BINDING	369	0.198138	0.944917	0.655689	0.7443	1	3472	tags=19%, list=18%, signal=23%
GOMF_ALCOHOL_BINDING	87	0.237014	0.942742	0.614833	0.747619	1	4363	tags=32%, list=22%, signal=41%
GOMF_NEUROTRANSMITTER_RECEPTOR_ACTIVITY_INVOLVED_IN_REGULATION_OF_POSTSYNAPTIC_MEMBRANE_POTENTIAL	47	0.263937	0.94011	0.562963	0.751962	1	5914	tags=45%, list=30%, signal=64%
GOMF_ISOPRENOID_BINDING	37	0.278871	0.93501	0.569565	0.762879	1	3735	tags=22%, list=19%, signal=27%
GOMF_ATPASE_BINDING	74	0.24434	0.934709	0.596027	0.761312	1	1955	tags=15%, list=10%, signal=16%
GOMF_DELAYED_RECTIFIER_POTASSIUM_CHANNEL_ACTIVITY	30	0.294171	0.928381	0.575824	0.77543	1	4957	tags=33%, list=26%, signal=45%
GOMF_AMINO_ACID_SODIUM_SYMPORTER_ACTIVITY	16	0.337129	0.928289	0.557851	0.773351	1	4251	tags=25%, list=22%, signal=32%
GOMF_OMEGA_PEPTIDASE_ACTIVITY	104	0.224917	0.921341	0.647643	0.788685	1	3367	tags=24%, list=17%, signal=29%
GOMF_PROTEASOME_BINDING	16	0.351977	0.918225	0.552209	0.794164	1	267	tags=13%, list=1%, signal=13%
GOMF_PHOSPHORIC_DIESTER_HYDROLASE_ACTIVITY	86	0.23176	0.915428	0.669834	0.798697	1	1882	tags=15%, list=10%, signal=17%
GOMF_TRANSLATION_INITIATION_FACTOR_ACTIVITY	43	0.264329	0.912534	0.601307	0.803436	1	4006	tags=30%, list=21%, signal=38%
GOMF_METAL_ION_TRANSMEMBRANE_TRANSPORTER_ACTIVITY	411	0.186925	0.91186	0.795597	0.802762	1	5033	tags=24%, list=26%, signal=32%
GOMF_APOLIPOPROTEIN_BINDING	18	0.322011	0.908379	0.589431	0.808895	1	4571	tags=44%, list=24%, signal=58%
GOMF_PROTON_TRANSMEMBRANE_TRANSPORTER_ACTIVITY	101	0.223598	0.905573	0.685279	0.81339	1	3435	tags=20%, list=18%, signal=24%
GOMF_HYDROLASE_ACTIVITY_ACTING_ON_GLYCOSYL_BONDS	128	0.213696	0.900239	0.721804	0.82371	1	2076	tags=14%, list=11%, signal=16%
GOMF_G_PROTEIN_BETA_SUBUNIT_BINDING	18	0.316401	0.89229	0.608137	0.840566	1	2426	tags=17%, list=13%, signal=19%
GOMF_RECEPTOR_ANTAGONIST_ACTIVITY	30	0.275211	0.88838	0.632385	0.847756	1	5131	tags=33%, list=26%, signal=45%
GOMF_GTPASE_ACTIVATING_PROTEIN_BINDING	15	0.337729	0.888015	0.629213	0.846162	1	1623	tags=20%, list=8%, signal=22%
GOMF_NEUROPEPTIDE_RECEPTOR_ACTIVITY	42	0.255071	0.885492	0.665909	0.849478	1	2272	tags=17%, list=12%, signal=19%
GOMF_CIS_TRANS_ISOMERASE_ACTIVITY	37	0.26347	0.885131	0.620137	0.847845	1	1176	tags=16%, list=6%, signal=17%
GOMF_CYCLIC_NUCLEOTIDE_PHOSPHODIESTERASE_ACTIVITY	24	0.292275	0.883806	0.622449	0.848553	1	1371	tags=17%, list=7%, signal=18%
GOMF_UBIQUITIN_LIKE_PROTEIN_LIGASE_ACTIVITY	291	0.188658	0.883101	0.872283	0.847854	1	4106	tags=22%, list=21%, signal=28%
GOMF_TRANSITION_METAL_ION_TRANSMEMBRANE_TRANSPORTER_ACTIVITY	38	0.267022	0.88305	0.633262	0.845488	1	1193	tags=13%, list=6%, signal=14%
GOMF_NON_MEMBRANE_SPANNING_PROTEIN_TYROSINE_KINASE_ACTIVITY	46	0.255373	0.88229	0.674419	0.844854	1	3419	tags=26%, list=18%, signal=32%
GOMF_HSP90_PROTEIN_BINDING	35	0.263578	0.879408	0.62987	0.849066	1	3600	tags=29%, list=19%, signal=35%
GOMF_LIGASE_ACTIVITY_FORMING_CARBON_SULFUR_BONDS	40	0.257178	0.878433	0.706667	0.848863	1	3091	tags=20%, list=16%, signal=24%
GOMF_CALCIUM_ION_TRANSMEMBRANE_TRANSPORTER_ACTIVITY	127	0.209779	0.876225	0.759901	0.851356	1	2821	tags=13%, list=15%, signal=16%
GOMF_MRNA_5_UTR_BINDING	23	0.285322	0.876119	0.649895	0.849176	1	5247	tags=30%, list=27%, signal=42%
GOMF_GALACTOSYLTRANSFERASE_ACTIVITY	32	0.276844	0.874795	0.664368	0.849701	1	4821	tags=28%, list=25%, signal=37%
GOMF_SOLUTE_ANION_ANTIPORTER_ACTIVITY	32	0.269052	0.871604	0.652632	0.854443	1	4833	tags=28%, list=25%, signal=37%
GOMF_SULFOTRANSFERASE_ACTIVITY	50	0.246594	0.870567	0.705336	0.854351	1	1302	tags=10%, list=7%, signal=11%
GOMF_ZINC_ION_TRANSMEMBRANE_TRANSPORTER_ACTIVITY	21	0.294814	0.866821	0.653689	0.85993	1	2330	tags=19%, list=12%, signal=22%
GOMF_G_PROTEIN_ACTIVITY	37	0.261345	0.865427	0.652452	0.860421	1	5227	tags=35%, list=27%, signal=48%
GOMF_DYNEIN_COMPLEX_BINDING	18	0.309082	0.863354	0.663717	0.86239	1	5101	tags=44%, list=26%, signal=60%
GOMF_NEUROPEPTIDE_RECEPTOR_BINDING	34	0.263241	0.860979	0.691176	0.864989	1	5539	tags=41%, list=29%, signal=58%
GOMF_SIALIC_ACID_BINDING	19	0.305141	0.859465	0.636929	0.865799	1	2064	tags=16%, list=11%, signal=18%
GOMF_SULFUR_COMPOUND_BINDING	241	0.188543	0.859129	0.876405	0.864158	1	3704	tags=22%, list=19%, signal=27%
GOMF_LIPASE_ACTIVITY	126	0.200377	0.84761	0.811224	0.885285	1	2862	tags=15%, list=15%, signal=18%
GOMF_MONOCARBOXYLIC_ACID_TRANSMEMBRANE_TRANSPORTER_ACTIVITY	53	0.23338	0.84488	0.747748	0.888221	1	2558	tags=15%, list=13%, signal=17%
GOMF_SODIUM_ION_TRANSMEMBRANE_TRANSPORTER_ACTIVITY	146	0.195196	0.844541	0.846354	0.886419	1	3068	tags=14%, list=16%, signal=17%
GOMF_PHOSPHOLIPASE_ACTIVITY	101	0.208689	0.843915	0.827423	0.885303	1	1260	tags=10%, list=6%, signal=11%
GOMF_ENDODEOXYRIBONUCLEASE_ACTIVITY	32	0.260132	0.842781	0.717345	0.88503	1	5222	tags=38%, list=27%, signal=51%
GOMF_PALMITOYL_COA_HYDROLASE_ACTIVITY	16	0.303935	0.836939	0.707754	0.894026	1	3301	tags=44%, list=17%, signal=53%
GOMF_GROWTH_FACTOR_BINDING	129	0.193932	0.826288	0.899183	0.911833	1	2608	tags=16%, list=13%, signal=18%
GOMF_CALCIUM_ACTIVATED_CATION_CHANNEL_ACTIVITY	25	0.275101	0.823537	0.714588	0.914502	1	2213	tags=16%, list=11%, signal=18%
GOMF_PHOSPHOLIPID_TRANSFER_ACTIVITY	22	0.280441	0.82225	0.723502	0.914468	1	5806	tags=50%, list=30%, signal=71%
GOMF_VOLTAGE_GATED_CHANNEL_ACTIVITY	193	0.185095	0.818946	0.939481	0.917927	1	3767	tags=19%, list=19%, signal=23%
GOMF_LIPID_TRANSFER_ACTIVITY	46	0.230451	0.813737	0.802691	0.924461	1	4857	tags=39%, list=25%, signal=52%
GOMF_SOLUTE_CATION_SYMPORTER_ACTIVITY	98	0.201579	0.812753	0.857471	0.923743	1	2596	tags=13%, list=13%, signal=15%
GOMF_VOLTAGE_GATED_CATION_CHANNEL_ACTIVITY	139	0.187571	0.809676	0.905817	0.926424	1	6856	tags=37%, list=35%, signal=56%
GOMF_O_ACYLTRANSFERASE_ACTIVITY	48	0.229723	0.807323	0.82093	0.927991	1	3145	tags=23%, list=16%, signal=27%
GOMF_POTASSIUM_CHANNEL_ACTIVITY	118	0.192701	0.805146	0.884615	0.929175	1	7100	tags=42%, list=37%, signal=66%
GOMF_STRUCTURAL_CONSTITUENT_OF_EYE_LENS	22	0.270296	0.804727	0.771552	0.927493	1	6483	tags=36%, list=33%, signal=55%
GOMF_LIGASE_ACTIVITY	124	0.193391	0.799347	0.887052	0.933683	1	5022	tags=31%, list=26%, signal=41%
GOMF_CYCLIN_DEPENDENT_PROTEIN_KINASE_ACTIVITY	28	0.255326	0.797937	0.776053	0.933559	1	5788	tags=43%, list=30%, signal=61%
GOMF_PHOSPHATIDYLINOSITOL_3_4_BISPHOSPHATE_BINDING	28	0.252647	0.795847	0.801636	0.93444	1	4525	tags=36%, list=23%, signal=47%
GOMF_3_5_EXONUCLEASE_ACTIVITY	44	0.225351	0.792944	0.848416	0.936325	1	4663	tags=32%, list=24%, signal=42%
GOMF_TBP_CLASS_PROTEIN_BINDING	24	0.26987	0.792142	0.788462	0.934993	1	5080	tags=29%, list=26%, signal=39%
GOMF_G_PROTEIN_COUPLED_CHEMOATTRACTANT_RECEPTOR_ACTIVITY	26	0.258007	0.791005	0.771134	0.934467	1	5839	tags=35%, list=30%, signal=49%
GOMF_CARGO_RECEPTOR_ACTIVITY	75	0.205765	0.78711	0.868597	0.937837	1	1286	tags=11%, list=7%, signal=11%
GOMF_CARD_DOMAIN_BINDING	15	0.295361	0.786733	0.760259	0.935922	1	4470	tags=40%, list=23%, signal=52%
GOMF_INSULIN_LIKE_GROWTH_FACTOR_BINDING	23	0.262581	0.785075	0.791232	0.936082	1	4451	tags=39%, list=23%, signal=51%
GOMF_SUMO_BINDING	16	0.285157	0.784691	0.767933	0.934156	1	829	tags=13%, list=4%, signal=13%
GOMF_TRANSLATION_REGULATOR_ACTIVITY_NUCLEIC_ACID_BINDING	82	0.202299	0.780523	0.903529	0.937813	1	5234	tags=30%, list=27%, signal=42%
GOMF_GABA_RECEPTOR_ACTIVITY	21	0.26752	0.7802	0.798687	0.935892	1	5914	tags=48%, list=30%, signal=68%
GOMF_C_C_CHEMOKINE_BINDING	24	0.259912	0.776169	0.799587	0.93932	1	5839	tags=38%, list=30%, signal=54%
GOMF_GLUTAMATE_RECEPTOR_ACTIVITY	27	0.247513	0.773903	0.830396	0.940053	1	5652	tags=37%, list=29%, signal=52%
GOMF_AMINO_ACID_CATION_SYMPORTER_ACTIVITY	22	0.258233	0.773136	0.813596	0.938719	1	6018	tags=27%, list=31%, signal=39%
GOMF_SOLUTE_PROTON_ANTIPORTER_ACTIVITY	22	0.252827	0.771968	0.820619	0.937978	1	1434	tags=14%, list=7%, signal=15%
GOMF_PROTEIN_TRANSPORTER_ACTIVITY	27	0.245219	0.768842	0.835498	0.940083	1	3997	tags=30%, list=21%, signal=37%
GOMF_CALCIUM_CHANNEL_REGULATOR_ACTIVITY	38	0.231759	0.764899	0.851685	0.942848	1	3491	tags=24%, list=18%, signal=29%
GOMF_PEPTIDE_HORMONE_BINDING	50	0.211356	0.763877	0.851765	0.941814	1	4341	tags=30%, list=22%, signal=39%
GOMF_NEUTRAL_AMINO_ACID_TRANSMEMBRANE_TRANSPORTER_ACTIVITY	41	0.223835	0.756445	0.845652	0.948861	1	2596	tags=17%, list=13%, signal=20%
GOMF_SODIUM_CHANNEL_ACTIVITY	46	0.214503	0.751816	0.899297	0.952273	1	7061	tags=43%, list=36%, signal=68%
GOMF_EXCITATORY_EXTRACELLULAR_LIGAND_GATED_ION_CHANNEL_ACTIVITY	27	0.234982	0.749886	0.86558	0.952284	1	7335	tags=56%, list=38%, signal=89%
GOMF_TRNA_BINDING	57	0.205522	0.748853	0.888361	0.951155	1	4590	tags=30%, list=24%, signal=39%
GOMF_O_METHYLTRANSFERASE_ACTIVITY	21	0.257044	0.744879	0.797468	0.953414	1	5588	tags=43%, list=29%, signal=60%
GOMF_IONOTROPIC_GLUTAMATE_RECEPTOR_ACTIVITY	19	0.264271	0.744548	0.845652	0.951442	1	5198	tags=32%, list=27%, signal=43%
GOMF_PHOSPHOLIPASE_C_ACTIVITY	26	0.242333	0.740787	0.853306	0.953401	1	1260	tags=12%, list=6%, signal=12%
GOMF_TRANSLATION_FACTOR_ACTIVITY_RNA_BINDING	67	0.193737	0.732663	0.921429	0.959971	1	5234	tags=30%, list=27%, signal=41%
GOMF_ACETYLCHOLINE_GATED_CATION_SELECTIVE_CHANNEL_ACTIVITY	15	0.272067	0.731069	0.80597	0.959233	1	5688	tags=40%, list=29%, signal=57%
GOMF_ESTROGEN_RECEPTOR_BINDING	34	0.221389	0.729936	0.923913	0.958142	1	1953	tags=15%, list=10%, signal=16%
GOMF_RRNA_BINDING	46	0.210041	0.726999	0.904328	0.958826	1	1507	tags=11%, list=8%, signal=12%
GOMF_SOLUTE_SODIUM_SYMPORTER_ACTIVITY	68	0.191025	0.721892	0.931604	0.961531	1	2984	tags=15%, list=15%, signal=17%
GOMF_PEPTIDE_RECEPTOR_ACTIVITY	147	0.16589	0.710294	0.989501	0.970272	1	5025	tags=24%, list=26%, signal=33%
GOMF_XENOBIOTIC_TRANSMEMBRANE_TRANSPORTER_ACTIVITY	29	0.22014	0.707582	0.914661	0.970352	1	2674	tags=17%, list=14%, signal=20%
GOMF_TRANSFERASE_ACTIVITY_TRANSFERRING_NITROGENOUS_GROUPS	21	0.238535	0.699178	0.872146	0.975401	1	1914	tags=14%, list=10%, signal=16%
GOMF_SEROTONIN_RECEPTOR_ACTIVITY	33	0.214493	0.693307	0.943601	0.977823	1	3128	tags=18%, list=16%, signal=22%
GOMF_HEPARAN_SULFATE_SULFOTRANSFERASE_ACTIVITY	15	0.259168	0.692493	0.878601	0.976115	1	2850	tags=13%, list=15%, signal=16%
GOMF_AMYLOID_BETA_BINDING	80	0.17709	0.691731	0.97669	0.974365	1	5106	tags=24%, list=26%, signal=32%
GOMF_PROTEIN_CARRIER_CHAPERONE	16	0.257644	0.690886	0.881481	0.972683	1	2489	tags=25%, list=13%, signal=29%
GOMF_METAL_ION_PROTON_ANTIPORTER_ACTIVITY	15	0.253322	0.682629	0.904573	0.976744	1	249	tags=7%, list=1%, signal=7%
GOMF_RETINOL_BINDING	16	0.247566	0.67808	0.905155	0.977437	1	2668	tags=19%, list=14%, signal=22%
GOMF_NEUROPEPTIDE_BINDING	25	0.223678	0.677111	0.919588	0.975761	1	4391	tags=24%, list=23%, signal=31%
GOMF_POTASSIUM_ION_ANTIPORTER_ACTIVITY	16	0.250667	0.67226	0.89375	0.97667	1	249	tags=6%, list=1%, signal=6%
GOMF_OPSONIN_BINDING	15	0.253007	0.669219	0.90342	0.976294	1	3624	tags=20%, list=19%, signal=25%
GOMF_PEPTIDOGLYCAN_BINDING	17	0.24479	0.669217	0.888211	0.973975	1	3467	tags=29%, list=18%, signal=36%
GOMF_NEUREXIN_FAMILY_PROTEIN_BINDING	15	0.247099	0.666028	0.900196	0.973752	1	178	tags=7%, list=1%, signal=7%
GOMF_RNA_POLYMERASE_ACTIVITY	36	0.197095	0.663696	0.964602	0.972918	1	2568	tags=14%, list=13%, signal=16%
GOMF_VOLTAGE_GATED_POTASSIUM_CHANNEL_ACTIVITY	88	0.165085	0.653372	0.992771	0.976556	1	6856	tags=40%, list=35%, signal=61%
GOMF_COMPLEMENT_BINDING	18	0.223642	0.63739	0.930085	0.982641	1	986	tags=11%, list=5%, signal=12%
GOMF_QUINONE_BINDING	15	0.236741	0.628039	0.915354	0.984914	1	4787	tags=33%, list=25%, signal=44%
GOMF_GAP_JUNCTION_CHANNEL_ACTIVITY	22	0.212238	0.622424	0.957983	0.984952	1	4099	tags=23%, list=21%, signal=29%
GOMF_BETA_1_3_GALACTOSYLTRANSFERASE_ACTIVITY	16	0.224729	0.615349	0.93464	0.985577	1	6838	tags=38%, list=35%, signal=58%
GOMF_LIGASE_ACTIVITY_FORMING_CARBON_OXYGEN_BONDS	20	0.208838	0.596406	0.956522	0.990203	1	6657	tags=50%, list=34%, signal=76%
GOMF_ORGANIC_ACID_SODIUM_SYMPORTER_ACTIVITY	29	0.190326	0.59456	0.976445	0.988485	1	4251	tags=21%, list=22%, signal=26%
GOMF_CATALYTIC_ACTIVITY_ACTING_ON_A_TRNA	97	0.14697	0.593982	1	0.986378	1	6782	tags=40%, list=35%, signal=61%
GOMF_VOLTAGE_GATED_SODIUM_CHANNEL_ACTIVITY	25	0.188601	0.571726	0.981366	0.99022	1	6641	tags=40%, list=34%, signal=61%
GOMF_FIBROBLAST_GROWTH_FACTOR_BINDING	22	0.183131	0.546647	0.98374	0.993211	1	7448	tags=59%, list=38%, signal=96%
GOMF_LYSOPHOSPHOLIPASE_ACTIVITY	25	0.174515	0.53184	0.99002	0.993365	1	1026	tags=8%, list=5%, signal=8%
GOMF_CARBOXY_LYASE_ACTIVITY	29	0.161165	0.51476	0.993304	0.993316	1	7062	tags=48%, list=36%, signal=76%
