# Supplementary material for: A novel application of hectorite nanoclay for preparation of colorectal cancer spheroids with malignant potential
Source: Royal Society of Chemistry journal article supplement (doi:10.1039/d2lc00750a), 2023-01-01
Supplement: d2lc00750a5.pdf [file d2lc00750a5.pdf]

***Electric Supplementary Information***

**A novel application of hectorite nanoclay for preparation of colorectal cancer spheroids with malignant potential**

Yoshihiro Hirade<sup>a</sup>, Munehiro Kubota<sup>b</sup>, Kaori Kitae<sup>a</sup>, Harumi Yamamoto<sup>a</sup>, Hiroko Omori<sup>c</sup>, Susumu Shinoki<sup>b</sup>, Takao Ohmura<sup>d</sup>, Kazutake Tsujikawa<sup>e\*</sup>

a. Graduate School of Pharmaceutical Science, Osaka University, 1-6 Yamada-oka, Suita City, Osaka 565-0871, Japan.

b. Iwaki Laboratory, Kunimine Industries Co, Ltd, 23-5 Kuidesaku, Shimofunao, Iwaki, Fukushima 972-8312, Japan.

c. Core Instrumentation Facility, Research Institute for Microbial Diseases, Osaka University, 3-1 Yamada-oka, Suita City, Osaka 565-0871, Japan.

d. Kunimine Industries Co, Ltd, 23-5 Kuidesaku, Shimofunao, Iwaki, Fukushima 972-8312, Japan.

e. Graduate School of Pharmaceutical Science, Osaka University, 1-6 Yamada-oka, Suita City, Osaka 565-0871, Japan. E-mail: [tujikawa@phs.osaka-u.ac.jp](mailto:tujikawa@phs.osaka-u.ac.jp)

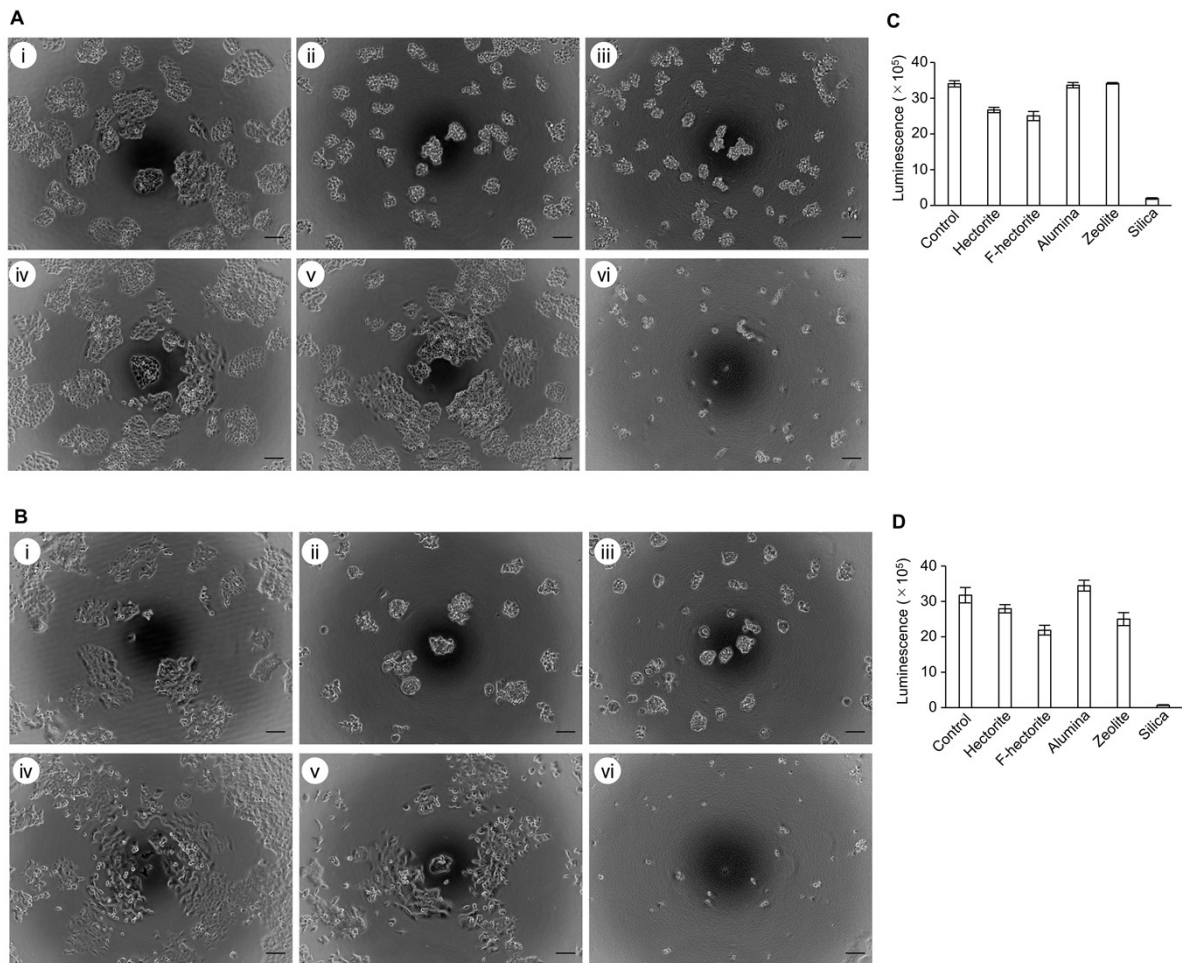

**Fig. S1** Morphology of DLD-1 (A) and HCT116 (B) cells cultured in an adherent plate for 4 days in the presence or absence of different minerals at a concentration of 0.01%. Figure notations are the same as in Figure 1. Scale bars indicate 100  $\mu\text{m}$ . Proliferation of DLD-1 (C) and HCT116 (D) cells cultured in an adherent plate for 5 days in the presence or absence of different minerals at a concentration of 0.01%, assessed using an ATP-based luminescence assay. Data are represented as mean  $\pm$  standard deviation.

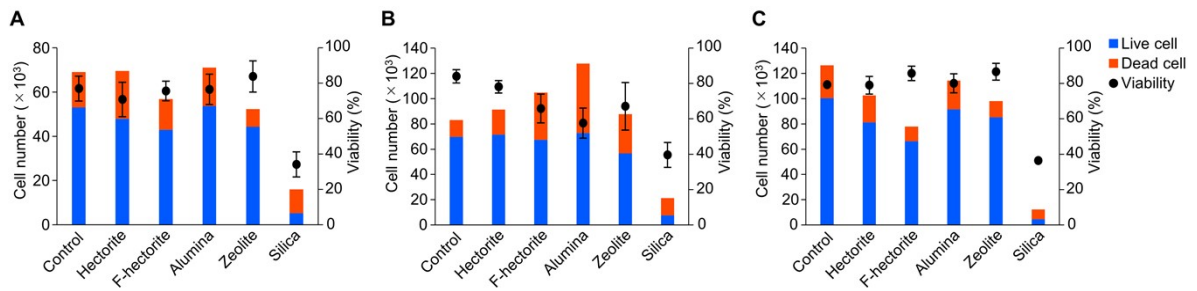

**Fig. S2** The number of live and dead cells and the viability of colorectal cancer cells cultured with different minerals. HT-29 (A), DLD-1 (B), and HCT116 (C) were cultured for 5 days in the presence of different minerals at a concentration of 0.01%. The number of live and dead cells and the viability were determined by trypan blue exclusion assay using an automated cell counter. The number of live and dead cells represented as a stacked bar chart is plotted on the primary vertical axis and the viability represented as closed circles is on the secondary vertical axis. Data are expressed as mean  $\pm$  standard deviation.

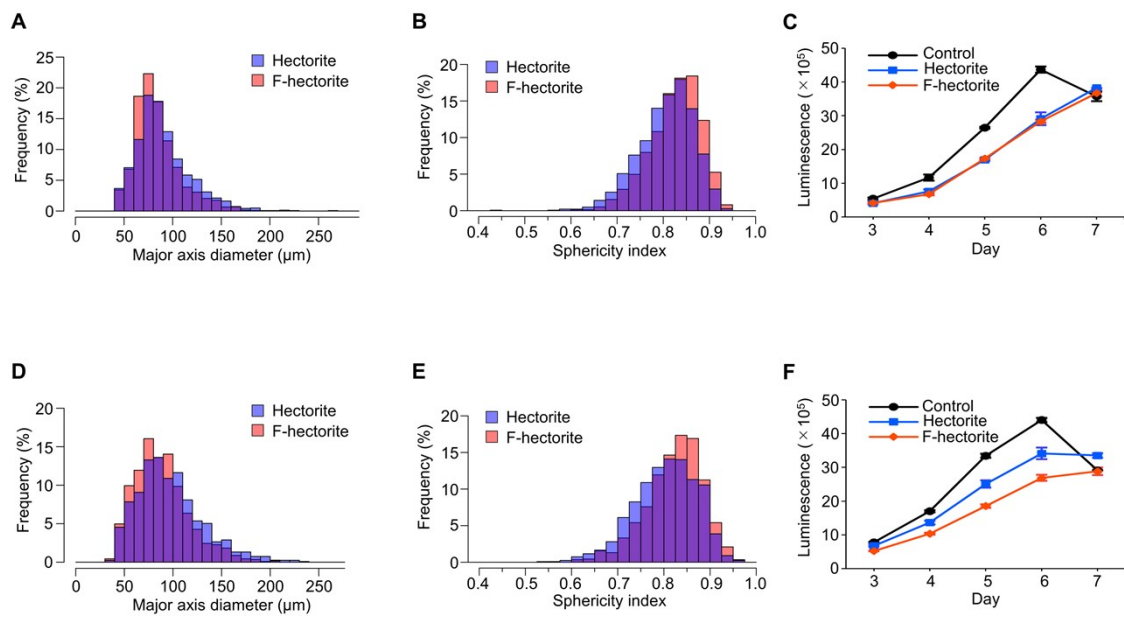

**Fig. S3** DLD-1 (A–C) and HCT116 (D–F) cells were cultured in an adherent plate in the presence of 0.01% hectorite or F-hectorite for 4 days. The major axis diameter of each spheroid was measured from micrographs using an image analysis application (A, D). The sphericity index of each spheroid was calculated as described in the Materials and methods section (B, E). Proliferation of DLD-1 (C) and HCT116 (F) cells cultured in an adherent plate in the presence or absence of 0.01% hectorite or F-hectorite, monitored daily using an ATP-based luminescence assay. Data are represented as mean  $\pm$  standard deviation.

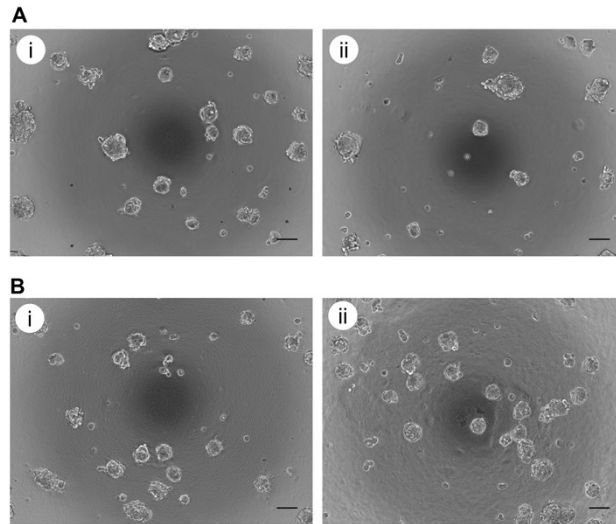

**Fig. S4** Images of HT29 spheroids position shift prepared by hectorite and F-hectorite before and after stirring. HT-29 cells were cultured in an adherent plate in the presence of 0.01% hectorite (A) or F-hectorite (B) for 5 days. The microscopy images were captured before (i) and after (ii) stirring by five times pipetting operation. Scale bars indicate 100  $\mu\text{m}$ .

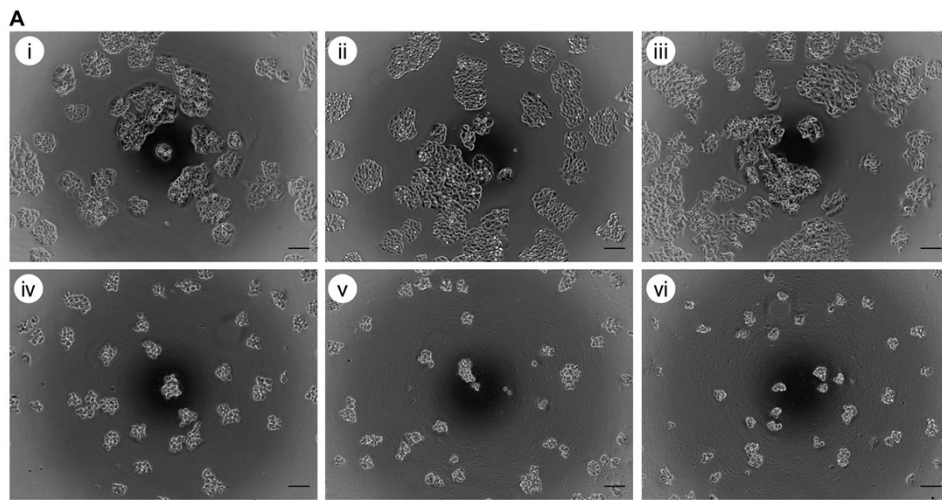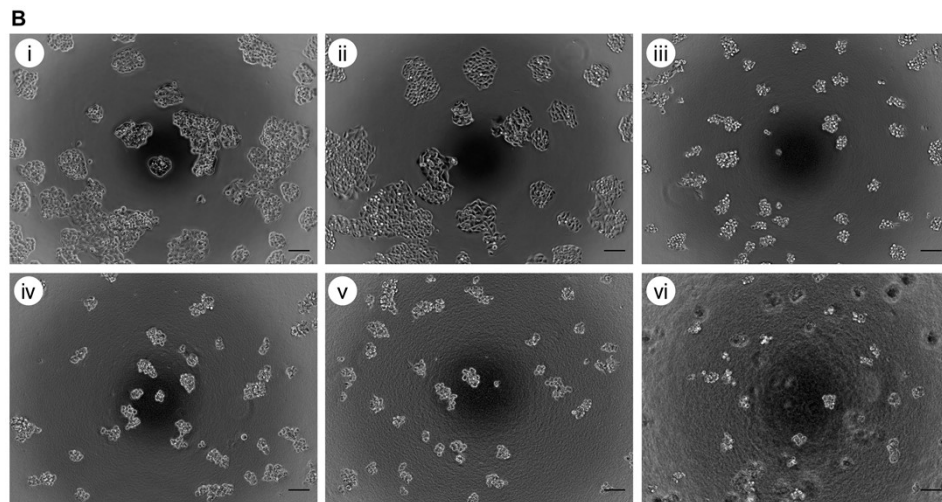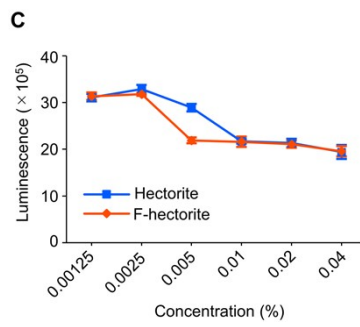

**D**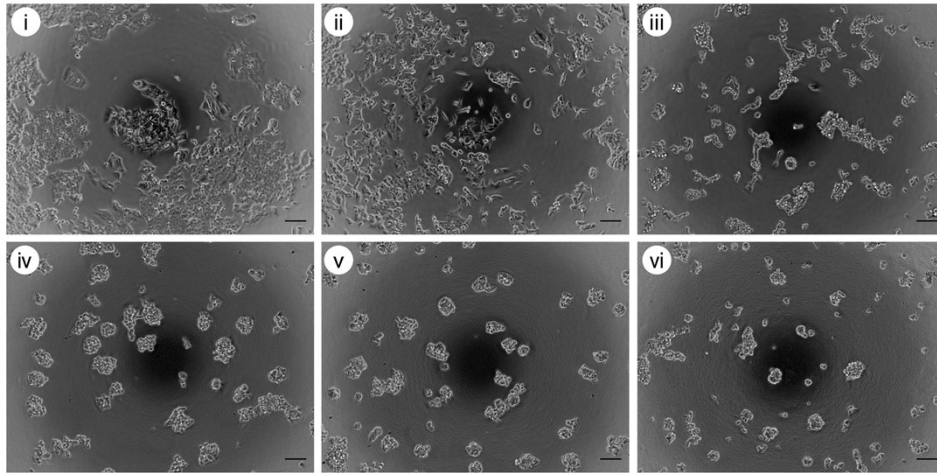**E**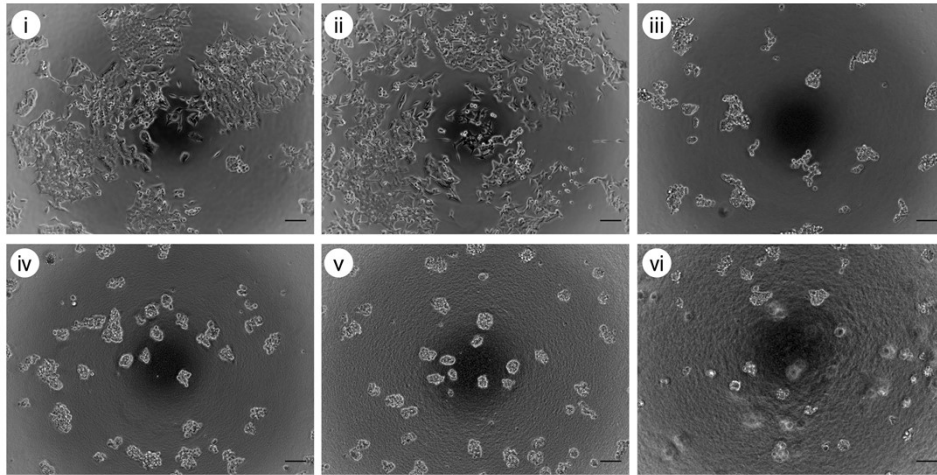**F**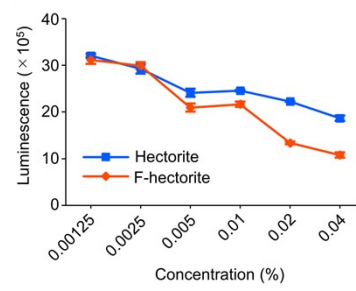

**Fig. S5** Morphology of DLD-1 cells cultured in an adherent plate for 4 days at different concentrations of hectorite (A) or F-hectorite (B); i, 0.00125%; ii, 0.0025%; iii, 0.005%; iv, 0.01%; v, 0.02%; vi, 0.04%. Scale bars indicate 100  $\mu\text{m}$ . (C) Proliferation of DLD-1 cells cultured in an adherent plate for 5 days at different concentrations of hectorite or F-hectorite, assessed using an ATP-based luminescence assay. Data are represented as mean  $\pm$  standard deviation. Morphology of HCT116 cells cultured in an adherent plate for 4 days at different concentrations of hectorite (D) or F-hectorite (E); i, 0.00125%; ii, 0.0025%; iii, 0.005%; iv, 0.01%; v, 0.02%; vi, 0.04%. Scale bars indicate 100  $\mu\text{m}$ . (F) Proliferation of HCT116 cells cultured in an adherent plate for 5 days under different concentrations of hectorite or F-hectorite, assessed using an ATP-based luminescence assay. Data are represented as mean  $\pm$  standard deviation.



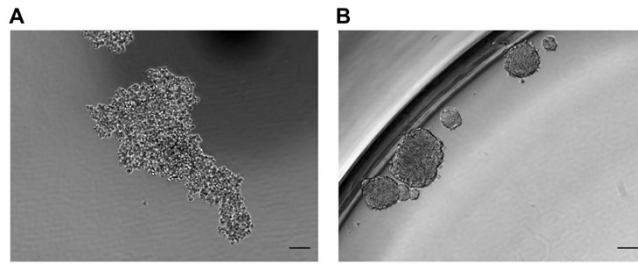

**Fig. S6** Morphology of DLD-1 (A) and HCT116 (B) cells cultured in an ultralow adherent plate for 5 days in a medium supplemented with 10% fetal calf serum.

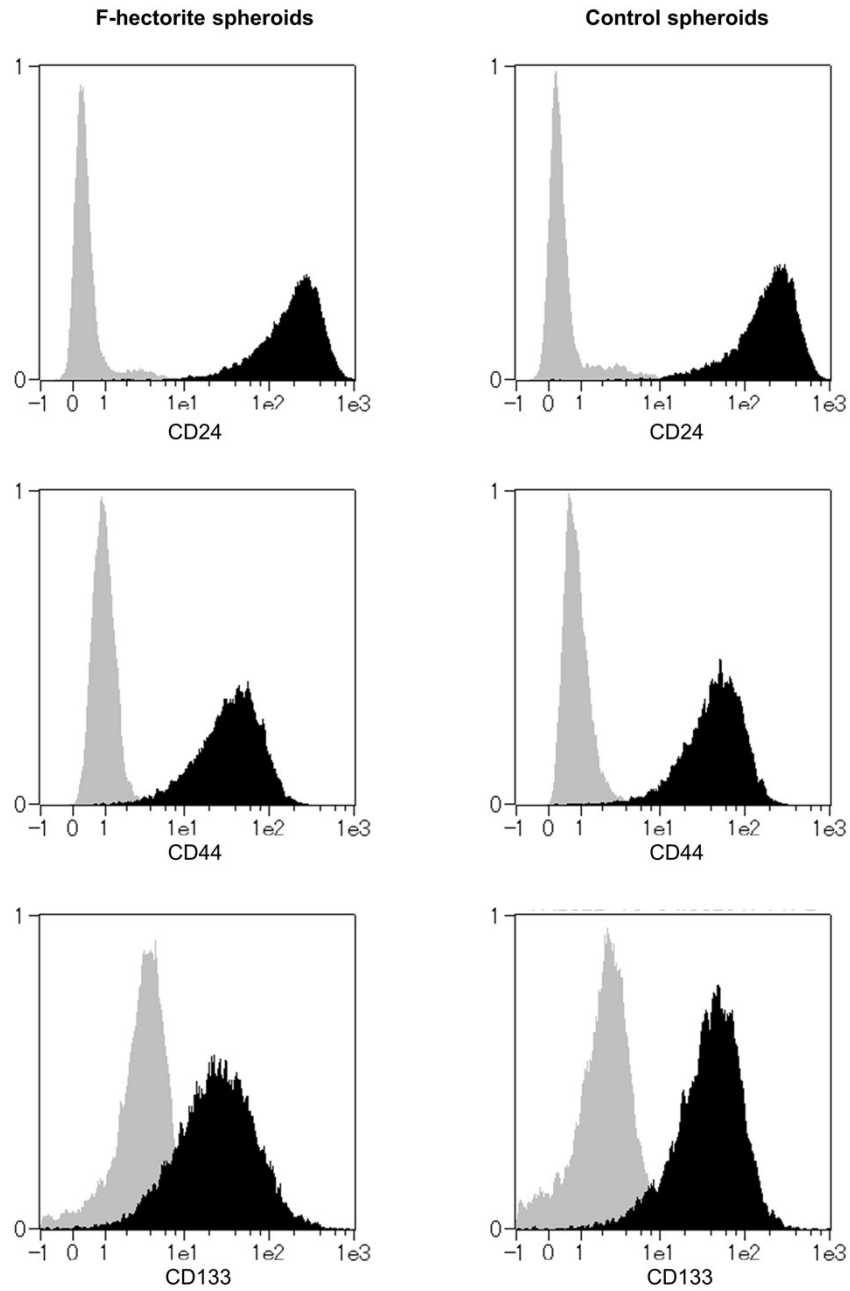

**Fig. S7** Expression comparison of CD44, CD24, and CD133 surface markers in HT-29 spheroids prepared by F- Hectorite and in an ultralow adherent plate. HT-29 cells were cultured with 0.01% F- Hectorite in an adherent plate (F- Hectorite spheroids) and in an ultralow adherent plate (Control spheroids), respectively for 5 days. After being dissociated into single cells, the cells were stained with either CD44, CD24 or CD133 antibody and analyzed by flow cytometry. The black and gray shaded histograms represent the analysis with the indicated antibody and a corresponding isotype control antibody, respectively. The number of signal events on the Y-axis was normalized by area.

**Table S1 Details of synthetic minerals used in this study**

| Minerals           | Product name   | Typical chemical formula                                                                                         | Specific surface area<br>(m <sup>2</sup> /g) | BSA adsorption* |
|--------------------|----------------|------------------------------------------------------------------------------------------------------------------|----------------------------------------------|-----------------|
| Alumina sol        | ALUMINASOL-200 | Al <sub>2</sub> O <sub>3</sub>                                                                                   | 492.3                                        | 452.9           |
| Coloidal silica    | SNOWTEX-CXS    | SiO <sub>2</sub>                                                                                                 | 475.4                                        | 88.9            |
| Hectorite          | SUMECTON-SWN   | Na <sub>0.33</sub> (Mg <sub>2.67</sub> Li <sub>0.33</sub> )(Si <sub>4</sub> O <sub>10</sub> )(OH) <sub>2</sub>   | 209.4                                        | 387.8           |
| Fluoride hectorite | SUMECTON-SWF   | Na <sub>0.33</sub> (Mg <sub>2.67</sub> Li <sub>0.33</sub> )(Si <sub>4</sub> O <sub>10</sub> )(F,OH) <sub>2</sub> | 341.4                                        | 484.8           |
| Zeolite            | Zeol 4A        | {Na <sub>12</sub> (Al <sub>12</sub> Si <sub>12</sub> O <sub>48</sub> ) • 27H <sub>2</sub> O} <sub>8</sub>        | 92.55                                        | 14.5            |

\*BSA adsorption amount was expressed as micrograms of BSA per milligrams of inorganic minerals (µg/mg)

**Table S2 Summary of quantitative analysis of DLD-1 and HCT116 spheroids formed using 0.01% hectorite minerals**

|                                                       | DLD-1            | HCT116           |
|-------------------------------------------------------|------------------|------------------|
| <b>Number of spheroids used for analysis</b>          |                  |                  |
| Hectorite                                             | 1420             | 1212             |
| F-hectorite                                           | 1368             | 1147             |
| <b>Major axis diameter (<math>\mu\text{m}</math>)</b> |                  |                  |
| Hectorite                                             | 86 $\pm$ 28      | 73 $\pm$ 34      |
| F-hectorite                                           | 80 $\pm$ 24      | 69 $\pm$ 28      |
| <b>Sphericity index</b>                               |                  |                  |
| Hectorite                                             | 0.77 $\pm$ 0.060 | 0.76 $\pm$ 0.068 |
| F-hectorite                                           | 0.79 $\pm$ 0.055 | 0.78 $\pm$ 0.060 |

Data are shown as median  $\pm$  standard deviation.

**Table S3 Top 30 of the downregulated genes in F-hectorite spheroids compared with that in control spheroids**

| Gene symbol | Description                                                                                   | Fold change | p-value  | FDR p-value |
|-------------|-----------------------------------------------------------------------------------------------|-------------|----------|-------------|
| TXNIP       | thioredoxin interacting protein                                                               | -219.72     | 1.28E-09 | 4.56E-06    |
| IFI6        | interferon, alpha-inducible protein 6                                                         | -61.64      | 3.43E-10 | 1.84E-06    |
| LAMP3       | lysosomal-associated membrane protein 3                                                       | -42.55      | 4.12E-11 | 8.84E-07    |
| MX1         | MX dynamin-like GTPase 1                                                                      | -30.8       | 3.35E-10 | 1.84E-06    |
| MMP13       | matrix metalloproteinase 13                                                                   | -30.65      | 3.16E-10 | 1.84E-06    |
| IFIT1       | interferon-induced protein with tetratricopeptide repeats 1                                   | -21.49      | 4.34E-09 | 9.31E-06    |
| OAS2        | 2-5-oligoadenylate synthetase 2                                                               | -18.07      | 2.60E-09 | 7.97E-06    |
| IFI27       | interferon, alpha-inducible protein 27                                                        | -16.68      | 6.76E-10 | 2.90E-06    |
| NDUFA4L2    | NADH dehydrogenase (ubiquinone) 1 alpha subcomplex, 4-like 2                                  | -16.21      | 4.22E-07 | 1.00E-04    |
| SERPINE2    | serpin peptidase inhibitor, clade E (nexin, plasminogen activator inhibitor type 1), member 2 | -14.5       | 8.67E-09 | 1.33E-05    |
| EGLN3       | egl-9 family hypoxia-inducible factor 3                                                       | -14.27      | 2.01E-08 | 2.15E-05    |
| CCL20       | chemokine (C-C motif) ligand 20                                                               | -13.86      | 9.55E-09 | 1.37E-05    |
| MT1A        | metallothionein 1A                                                                            | -12.97      | 4.05E-07 | 1.00E-04    |
| MX2         | MX dynamin-like GTPase 2                                                                      | -12.15      | 4.43E-07 | 1.00E-04    |
| IFI44L      | interferon-induced protein 44-like                                                            | -11.79      | 3.65E-09 | 9.31E-06    |
| MT1L        | metallothionein 1L (gene/pseudogene)                                                          | -11.3       | 1.67E-08 | 2.10E-05    |
| DDX58       | DEAD (Asp-Glu-Ala-Asp) box polypeptide 58                                                     | -11.18      | 4.00E-09 | 9.31E-06    |
| MT1X        | metallothionein 1X                                                                            | -10.78      | 8.45E-09 | 1.33E-05    |
| MT2A        | metallothionein 2A                                                                            | -10.65      | 7.51E-08 | 5.52E-05    |
| TNFSF10     | tumor necrosis factor (ligand) superfamily, member 10                                         | -10.42      | 1.94E-08 | 2.15E-05    |
| NDRG1       | N-myc downstream regulated 1                                                                  | -10.36      | 1.26E-05 | 1.50E-03    |
| SPINK1      | serine peptidase inhibitor, Kazal type 1                                                      | -9.83       | 8.71E-08 | 6.03E-05    |
| NUCB2       | nucleobindin 2                                                                                | -9.75       | 1.35E-07 | 8.01E-05    |
| ARRDC4      | arrestin domain containing 4                                                                  | -9.24       | 5.08E-09 | 9.91E-06    |
| OAS1        | 2-5-oligoadenylate synthetase 1                                                               | -9.22       | 9.42E-08 | 6.31E-05    |
| CLGN        | calmegin                                                                                      | -9.22       | 6.55E-08 | 5.02E-05    |
| PARP9       | poly(ADP-ribose) polymerase family member 9                                                   | -8.98       | 1.03E-08 | 1.38E-05    |
| P4HA2       | prolyl 4-hydroxylase, alpha polypeptide II                                                    | -8.87       | 2.97E-08 | 2.75E-05    |
| FXYD3;      | FXYD domain containing ion transport regulator 3;                                             | -8.79       | 6.31E-07 | 2.00E-04    |
| MIR6887     | microRNA 6887                                                                                 | -8.79       | 6.31E-07 | 2.00E-04    |
| SP110       | SP110 nuclear body protein                                                                    | -8.36       | 3.73E-07 | 1.00E-04    |

**Table S4 Expression of cancer stem cell-related markers in F-hectorite spheroids compared with that in control spheroids**

| <b>Gene Symbol</b> | <b>Description</b>                 | <b>Fold change</b> | <b>p-value</b> | <b>FDR p-value</b> |
|--------------------|------------------------------------|--------------------|----------------|--------------------|
| CD24               | CD24 molecule                      | 1.64               | 3.14E-03       | 5.52E-02           |
| CD44               | CD44 molecule (Indian blood group) | 2.33               | 1.17E-03       | 2.96E-02           |
| CD133              | prominin 1                         | 1.32               | 3.65E-02       | 2.29E-01           |

The fold change represents the ratio of F-hectorite to control spheroids.

**Table S5 Expression of cadherin and EpCAM molecules in F-hectorite spheroids compared with that in control spheroids**

| <b>Gene Symbol</b> | <b>Description</b>                        | <b>Fold change</b> | <b>p-value</b> | <b>FDR p-value</b> |
|--------------------|-------------------------------------------|--------------------|----------------|--------------------|
| CDH1               | cadherin 1, type 1, E-cadherin            | 1.19               | 2.30E-01       | 5.70E-01           |
| CDH2               | cadherin 2, type 1, N-cadherin (neuronal) | 1.09               | 7.03E-01       | 8.92E-01           |
| EPCAM              | epithelial cell adhesion molecule         | 1.11               | 5.16E-01       | 7.98E-01           |

The fold change represents the ratio of F-hectorite to control spheroids.
